# Supplementary material for: Lake microbiome and trophy fluctuations of the ancient hemp rettery
Source: Springer Nature journal article supplement (doi:10.1038/s41598-022-12761-w), 2022-05-25
Supplement: MOESM7 [file 41598_2022_12761_MOESM7_ESM.pdf]

## Supplementary information for

### *Lake Microbiome and Trophic Fluctuations of the Ancient Hemp Rettery*

***Olga Iwańska<sup>1,2,+</sup>, Przemysław Latoch<sup>1,3,+</sup>, Magdalena Suchora<sup>4,5</sup>, Irena A. Pidek<sup>4</sup>, Miłosz Huber<sup>4</sup>, Iwona Bubak<sup>6</sup>, Natalia Kopik<sup>1,2</sup>, Mariia Kovalenko<sup>1,2</sup>, Michał Gąsiorowski<sup>7</sup>, Jean-Paul Armache<sup>8</sup>, Agata L Starosta<sup>1,2,\*</sup>***

<sup>1</sup> ECOTECH-Complex and Institute of Biological Sciences, Maria Curie-Skłodowska University, Lublin, Poland

<sup>2</sup> Institute of Biochemistry and Biophysics, Polish Academy of Science, Warsaw, Poland

<sup>3</sup> Polish-Japanese Academy of Information Technology, Warsaw, Poland

<sup>4</sup> Institute of Earth and Environmental Sciences, Maria Curie-Skłodowska University, Lublin, Poland

<sup>5</sup> ECOTECH-Complex, Maria Curie-Skłodowska University, Lublin, Poland

<sup>6</sup> Department of Hydrology, Institute of Geography, University of Gdansk, Gdansk, Poland

<sup>7</sup> Institute of Geological Sciences Polish Academy of Science, Warsaw, Poland

<sup>8</sup> Department of Biochemistry and Molecular Biology and the Huck Institute of Life Sciences, Pennsylvania State University, Pennsylvania, United States

+ contributed equally.

\* corresponding author:

Agata L Starosta [agata.starosta@gmail.com](mailto:agata.starosta@gmail.com), [agata.starosta@ibb.waw.pl](mailto:agata.starosta@ibb.waw.pl)

**This supplemental material includes:**

Supplemental Figure 1-6

Supplemental Table 1-5

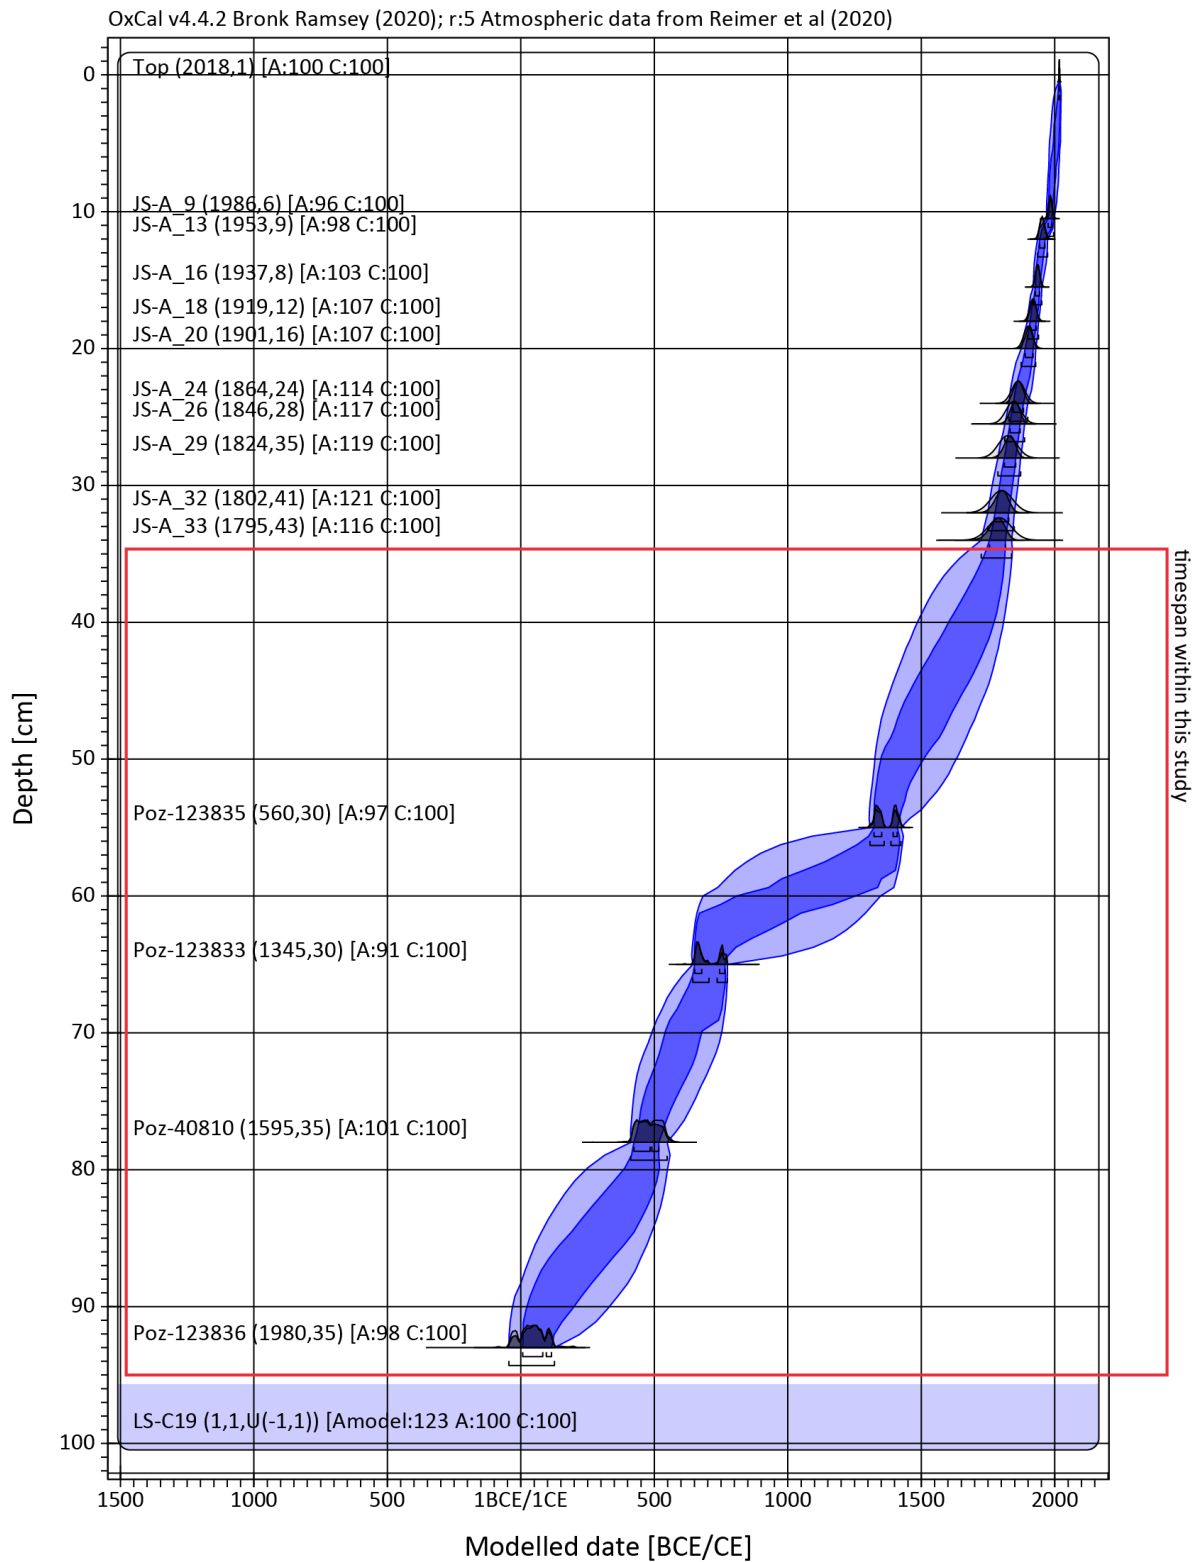

**SuppFig 1.** Age-depth model – constructed by MS with OxCal 4.4 software (<https://c14.arch.ox.ac.uk/oxcal.html>).

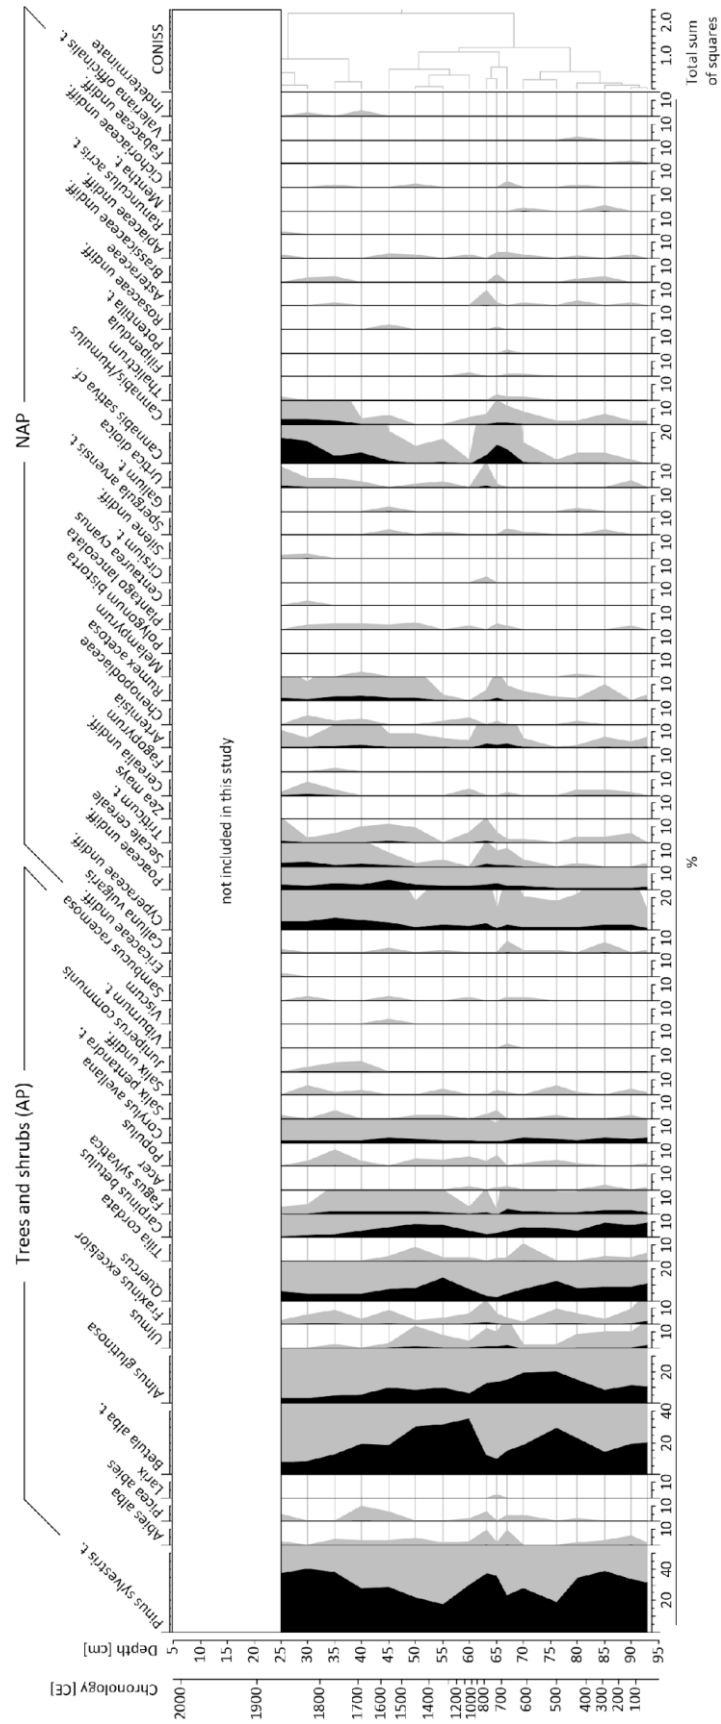

**SuppFig 2.** Pollen percentage diagram of LS-C19 core – drawn by MS with Tilia software (<https://www.tiliait.com>) based on data provided by IAP.





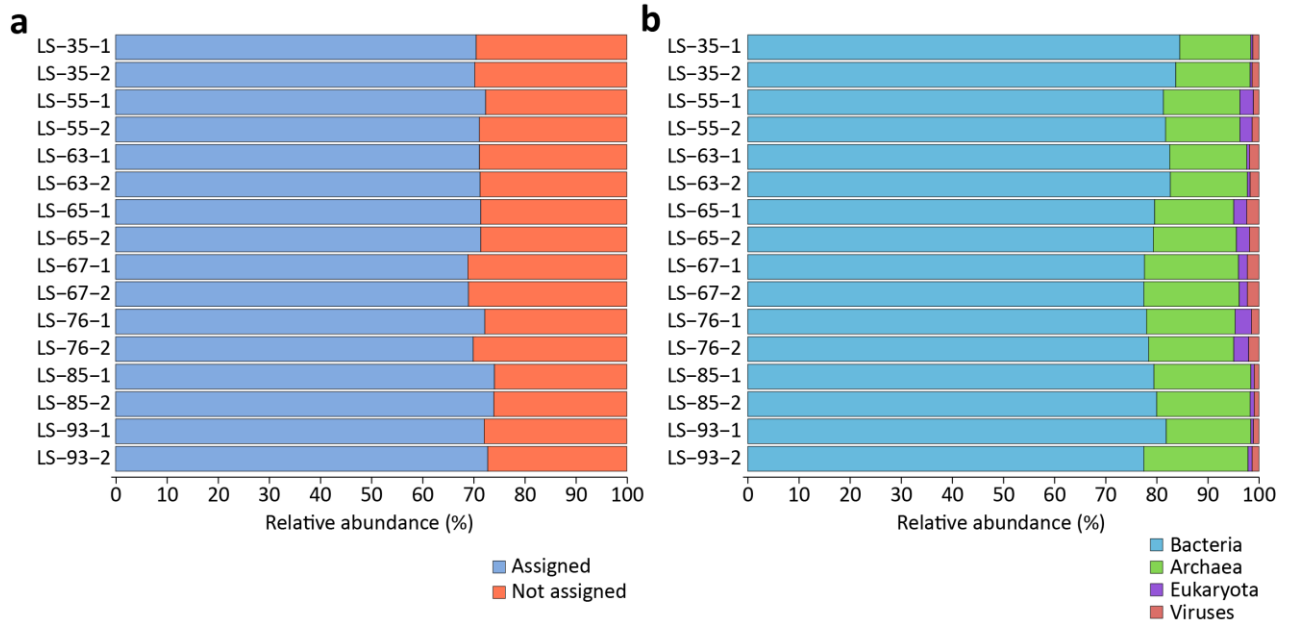

**SuppFig 5. (a)** Taxonomic assignment of sequences per sample. **(b)** Domain assignment per sample.

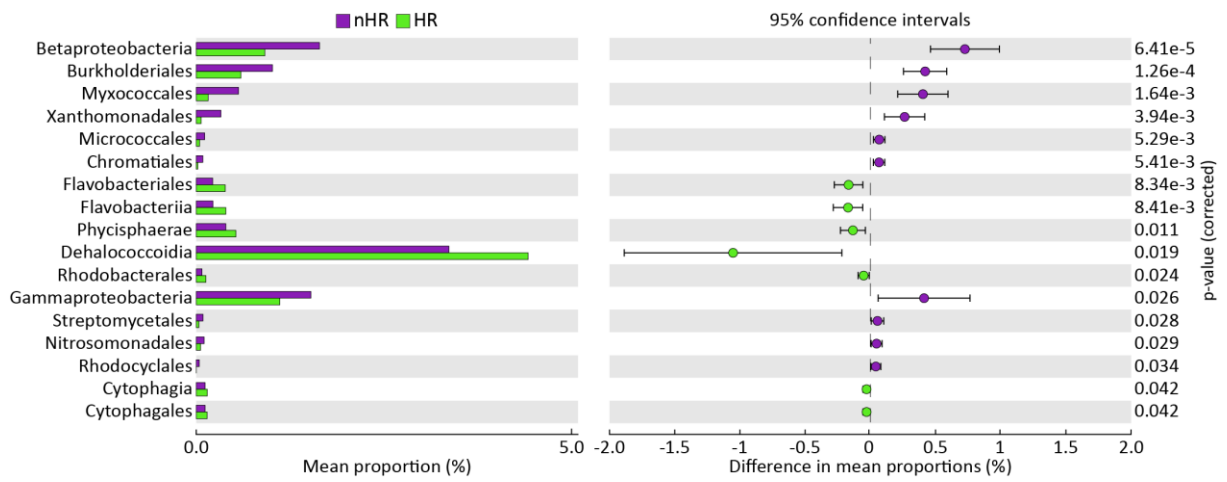

**SuppFig 6.** Extended error bar plot showing significant differences ( $p < 0.05$ ) in the taxa abundances at the class-subclass level for 'HR' (green) vs 'nHR' (purple) groups, calculated with two-sided Welch's t-test (STAMP).

**SuppTab 1.** List of Cladocera taxa recorded in LS-C19 core and their ecological preferences according to Flössner (2000) and Bjerring *et al.* (2009), Błędzki and Rybak (2010).

| taxa                                                                                   | habitat                                               |                    |
|----------------------------------------------------------------------------------------|-------------------------------------------------------|--------------------|
|                                                                                        | planktonic/littoral                                   | benthic/vegetation |
| <i>Leptodora kindti</i> (Focke, 1844)                                                  | planktonic                                            | -                  |
| <i>Bosmina longirostris</i> (O.F. Muller 1785)                                         | planktonic                                            | -                  |
| <i>Eubosmina</i> ( <i>E. coregoni</i> Baird, 1857 & <i>E. longispina</i> Leydig, 1860) | planktonic                                            | -                  |
| <i>Daphnia longispina</i> -group (O.F. Muller 1776)                                    | planktonic                                            | -                  |
| <i>Ceriodaphnia sp.</i> (Dana, 1853)                                                   | planktonic/littoral                                   | vegetation         |
| <i>Sida crystallina</i> (O.F. Muller, 1776)                                            | planktonic/littoral                                   | vegetation         |
| <i>Euryercus lamellatus</i> (O.F. Muller, 1776)                                        | littoral                                              | vegetation         |
| <i>Acroperus harpae</i> (Baird, 1834)                                                  | littoral                                              | vegetation         |
| <i>Camptocercus rectirostris</i> (Schrödler, 1862)                                     | littoral                                              | vegetation         |
| <i>Alona affinis</i> (Leydig, 1860)                                                    | littoral                                              | vegetation         |
| <i>Alona quadrangularis</i> (Baird, 1843)                                              | littoral                                              | benthic/vegetation |
| <i>Alonella excisa</i> (Fischer, 1854)                                                 | littoral                                              | vegetation         |
| <i>Alonella exigua</i> (Lilljeborg, 1853)                                              | littoral                                              | vegetation         |
| <i>Chydorus sphaericus s.l.</i> (O.F. Muller, 1776)                                    | littoral/planktonic<br>(while blue-green algae bloom) | varied             |
| <i>Alona costata</i> (Sars, 1862)                                                      | littoral                                              | vegetation         |
| <i>Alonella nana</i> (Baird, 1834)                                                     | littoral                                              | vegetation         |
| <i>Pleuroxus trigonellus</i> (O.F. Muller, 1776)                                       | littoral                                              | vegetation         |
| <i>Pleuroxus uncinatus</i> (Baird, 1850)                                               | littoral                                              | vegetation         |
| <i>Peracantha truncata</i> (O.F. Muller, 1785)                                         | littoral                                              | vegetation         |
| <i>Pleuroxus laevis</i> (Sars, 1862)                                                   | littoral                                              | vegetation         |
| <i>Graptoleberis testudinaria</i> (Fischer, 1848)                                      | littoral                                              | vegetation         |
| <i>Leydigia leydigi</i> (Schrödler, 1863)                                              | littoral                                              | benthic            |
| <i>Leydigia acanthocercoides</i> (Fischer, 1854)                                       | littoral                                              | vegetation         |
| <i>Alona guttata</i> (Sars 1862)                                                       | littoral                                              | vegetation         |
| <i>Alona rectangula</i> (Sars 1861)                                                    | littoral                                              | vegetation         |
| <i>Kurzia lattissima</i> (Kurz, 1875)                                                  | littoral                                              | vegetation         |
| <i>Disparalona rostrata</i> (Koch, 1841)                                               | littoral                                              | benthic            |
| <i>Oxyurella tenuicaudis</i> (Sars, 1862)                                              | littoral                                              | vegetation         |
| <i>Alona protzi</i> (Hartwig 1900)                                                     | littoral                                              | benthic/phreatic   |
| <i>Latona setifera</i> (O.F. Müller, 1776)                                             | littoral                                              | benthic            |
| <i>Anchistropus emarginatus</i> (Sars, 1862)                                           | littoral                                              | vegetation         |
| <i>Camptocercus lilljeborgi</i> (Schrodler, 1861)                                      | littoral                                              | vegetation         |
| <i>Camptocercus fennicus</i> (Stenroos, 1898)                                          | littoral                                              | vegetation         |
| <i>Poyphemus pediculus</i> (Linné, 1761)                                               | littoral                                              | vegetation         |

Cladocera taxa included in trophic inference as high trophic indicators (counted as the percentage among total littoral taxa): *Alona rectangula*, *Chydorus sphaericus*, *Pleuroxus uncinatus*, *Leydigia leydigi*, *Leydigia acanthocercoides*, *Disparalona rostrata*, *Oxyurella tenuicaudis*, *Camptocercus lilljeborgi* and *Graptoleberis testudinaria*.

**SuppTab 2.** List of dominant diatom taxa recorded in LS-C19 core and their ecological preferences; habitat system by Round (1981), pH system by Hustedt (1937–39), trophic system by Neumann (1932).

| <b>Taxa</b>                                                                              | <b>habitat</b> | <b>pH</b>                       | <b>trophy</b>     |
|------------------------------------------------------------------------------------------|----------------|---------------------------------|-------------------|
| <i>Amphora libyca</i> Ehrenberg                                                          | benthic        | alkaliphilous                   | oligotraphentic   |
| <i>Asterionella formosa</i> Hassal                                                       | planktonic     | alkaliphilous                   | eu-mesotraphentic |
| <i>Aulacoseira ambigua</i> (Grunow) Simonsen                                             | planktonic     | alkaliphilous-<br>neutrophilic  | eutraphentic      |
| <i>Aulacoseira granulata</i> (Ehrenberg) Simonsen                                        | planktonic     | alkaliphilous                   | eutraphentic      |
| <i>Aulacoseira italica</i> (Ehrenberg) Simonsen                                          | planktonic     | neutrophilic -<br>alkaliphilous | eutraphentic      |
| <i>Cyclostephanos dubius</i> (Fricke) Round                                              | planktonic     | alkaliphilous                   | eutraphentic      |
| <i>Cyclotella cyclopuncta</i> Håkansson & J.R.Carter                                     | planktonic     | neutrophilic                    | oligotraphentic   |
| <i>Cyclotella distinguenda</i> v. <i>unipunctata</i> (Hustedt)<br>Håkansson & J.R.Carter | planktonic     | neutrophilic                    | oligotraphentic   |
| <i>Fragilaria nanana</i> Lange-Bertalot                                                  | benthic        | neutrophilic                    | oligotraphentic   |
| <i>Gomphonema acuminatum</i> Ehrenberg                                                   | benthic        | alkaliphilous-<br>neutrophilic  | eu-dystraphentic  |
| <i>Gomphonema angustum</i> Agardh                                                        | benthic        | neutrophilic                    | eu-dystraphentic  |
| <i>Gomphonella olivacea</i> (Hornemann) Rabenhorst                                       | benthic        | alkaliphilous                   | eu-dystraphentic  |
| <i>Gomphonema parvulum</i> (Kützing) Kützing                                             | benthic        | alkaliphilous-<br>neutrophilic  | eu-mesotraphentic |
| <i>Gomphonema truncatum</i> Ehrenberg                                                    | benthic        | alkaliphilous                   | eu-dystraphentic  |
| <i>Lindavia comensis</i> (Pantocsek) Nakov et al.                                        | planktonic     | neutrophilic                    | oligotraphentic   |
| <i>Lindavia ocellata</i> (Pantocsek) Nakov et al.                                        | planktonic     | alkaliphilous                   | oligotraphentic   |
| <i>Lindavia radiosa</i> (Grunow, Lemmermann) De Toni &<br>Forti                          | planktonic     | alkaliphilous                   | mesotraphentic    |
| <i>Pseudostaurosira parasitica</i> (Smith) Morales                                       | benthic        | alkaliphilous                   | eu-mesotraphentic |
| <i>Stephanodiscus hantzschii</i> Grunow                                                  | planktonic     | alkalib- alkaliph               | eutraphentic      |
| <i>Stephanodiscus medius</i> Håkansson                                                   | planktonic     | alkaliphilous                   | eutraphentic      |
| <i>Stephanodiscus parvus</i> Stoermer & Håkansson                                        | planktonic     | alkalibiontic                   | eutraphentic      |
| <i>Surirella bifrons</i> Ehrenberg                                                       | benthic        | alkaliphilous                   | oligotraphentic   |
| <i>Synedra ulna</i> (Nitzsch) Ehrenberg                                                  | benthic        | alkaliphilous-<br>neutrophilic  | eutraphentic      |
| <i>Ulnaria capitata</i> Ehrenberg Compère                                                | benthic        | alkaliphilous                   | eu-mesotraphentic |
| <i>Ulnaria contracta</i> (Østrup) Morales & Vis                                          | benthic        | alkaliphilous                   | eutraphentic      |

**SuppTab 3.** Investigated environmental factors with values for all samples.

| Samples description |            |             |                       | Environmental factors |            |                  |              |                 |                                    |                                |                  |              |
|---------------------|------------|-------------|-----------------------|-----------------------|------------|------------------|--------------|-----------------|------------------------------------|--------------------------------|------------------|--------------|
| Name                | Depth [cm] | Age [years] | Hemp retting [Yes/No] | Cereal* [%]           | Weeds* [%] | Forestation* [%] | Pasture* [%] | Hemp pollen [%] | Carbonates (LOI 950°C × 2,274) [%] | Organic carbon (LOI 550°C) [%] | Fibres [per 1 g] | Trophy** [%] |
| LS-35-1             | 35         | 1754        | N                     | 7.6                   | 9.9        | 71.4             | 0.4          | 7.9             | 24.73                              | 20.19                          | 400              | 19.05        |
| LS-35-2             | 35         | 1754        | N                     | 7.6                   | 9.9        | 71.4             | 0.4          | 7.9             | 24.73                              | 20.19                          | 400              | 19.05        |
| LS-55-1             | 55         | 1367        | N                     | 1.9                   | 5.1        | 89.4             | 0            | 1.5             | 35.8                               | 11.49                          | 200              | 10.53        |
| LS-55-2             | 55         | 1367        | N                     | 1.9                   | 5.1        | 89.4             | 0            | 1.5             | 35.8                               | 11.49                          | 200              | 10.53        |
| LS-63-1             | 63         | 913         | Y                     | 9.4                   | 8.4        | 76.5             | 0            | 6.9             | 31.1                               | 23.26                          | 5500             | 48.19        |
| LS-63-2             | 63         | 913         | Y                     | 9.4                   | 8.4        | 76.5             | 0            | 6.9             | 31.1                               | 23.26                          | 5500             | 48.19        |
| LS-65-1             | 65         | 710         | Y                     | 14.2                  | 10.1       | 71.8             | 0.3          | 14              | 25.9                               | 30.95                          | 5000             | 48.6         |
| LS-65-2             | 65         | 710         | Y                     | 14.2                  | 10.1       | 71.8             | 0.3          | 14              | 25.86                              | 30.95                          | 5000             | 48.6         |
| LS-67-1             | 67         | 668         | Y                     | 10.9                  | 7.8        | 74.8             | 0.2          | 10.6            | 29.5                               | 22.57                          | 1000             | 43.88        |
| LS-67-2             | 67         | 668         | Y                     | 10.9                  | 7.8        | 74.8             | 0.2          | 10.6            | 29.5                               | 22.57                          | 1000             | 43.88        |
| LS-76-1             | 76         | 521         | N                     | 0.2                   | 1.8        | 95.9             | 0            | 0.4             | 31.74                              | 21.68                          | 100              | 33.09        |
| LS-76-2             | 76         | 521         | N                     | 0.2                   | 1.8        | 95.9             | 0            | 0.4             | 31.74                              | 21.68                          | 100              | 33.09        |
| LS-85-1             | 85         | 274         | Y                     | 1.3                   | 4          | 89.8             | 0            | 1.2             | 32.57                              | 18.85                          | 4000             | 30.11        |
| LS-85-2             | 85         | 274         | Y                     | 1.3                   | 4          | 89.8             | 0            | 1.2             | 32.57                              | 18.85                          | 4000             | 30.11        |
| LS-93-1             | 93         | 42          | N                     | 0.2                   | 3.4        | 94.8             | 0            | 0.2             | 26.2                               | 29.12                          | 300              | 13.24        |
| LS-93-2             | 93         | 42          | N                     | 0.2                   | 3.4        | 94.8             | 0            | 0.2             | 26.2                               | 29.12                          | 300              | 13.24        |

\* Cereal, weeds, forestation and pasture are calculated based on pollen percentages of the following species:

Cereal: *Secale cereale*, *Triticum* sp., *Fagopyrum* sp., *Linum usitatissimum*, *Cannabis sativa*, other (Cerealia undiff.)

Weeds: *Centaurea cyanus*, *Convolvulus arvensis*, *Artemisia* sp., *Chenopodiaceae*, *Urtica*, *Brassicaceae*, *Rumex acetosella* t., *Spergula arvensis*, *Scleranthus annuus*

Forestation: sum of all arboreal pollen

Pasture: *Plantago lanceolata*

\*\*trophy inference was estimated based on the percentage abundance of the examined Cladocera taxa with ecological preferences towards high/low trophy (as listed in SuppTab. 1).

**SuppTab 4.** Selected carbon metabolic marker genes KOs involved in different pathways of the carbon cycle.

| Cycle                                  | KEGG Orthology (KO) | Gene                                                                                                      |
|----------------------------------------|---------------------|-----------------------------------------------------------------------------------------------------------|
| Anaerobic Carbon Fixation              | K01648              | ACLY; ATP citrate (pro-S)-lyase [EC:2.3.3.8]                                                              |
|                                        | K00174              | korA, oorA, oforA; 2-oxoglutarate/2-oxoacid ferredoxin oxidoreductase subunit alpha [EC:1.2.7.3 1.2.7.11] |
|                                        | K00175              | korB, oorB, oforB; 2-oxoglutarate/2-oxoacid ferredoxin oxidoreductase subunit beta [EC:1.2.7.3 1.2.7.11]  |
|                                        | K00244              | frdA; fumarate reductase flavoprotein subunit [EC:1.3.5.4]                                                |
|                                        | K00194              | cdhD, acsD; acetyl-CoA decarbonylase/synthase, CODH/ACS complex subunit delta [EC:2.1.1.245]              |
|                                        | K00197              | cdhE, acsC; acetyl-CoA decarbonylase/synthase, CODH/ACS complex subunit gamma [EC:2.1.1.245]              |
| Aerobic Carbon Fixation (Calvin cycle) | K00855              | PRK, prkB; phosphoribulokinase [EC:2.7.1.19]                                                              |
|                                        | K01602              | rbcS, cbbS; ribulose-bisphosphate carboxylase small chain [EC:4.1.1.39]                                   |
| Fermentation                           | K00016              | LDH, ldh; L-lactate dehydrogenase [EC:1.1.1.27]                                                           |
|                                        | K00169              | porA; pyruvate ferredoxin oxidoreductase alpha subunit [EC:1.2.7.1]                                       |
|                                        | K00170              | porB; pyruvate ferredoxin oxidoreductase beta subunit [EC:1.2.7.1]                                        |
| Aerobic Respiration                    | K02274              | coxA, ctaD; cytochrome c oxidase subunit I [EC:7.1.1.9]                                                   |
|                                        | K02276              | coxC, ctaE; cytochrome c oxidase subunit III [EC:7.1.1.9]                                                 |
| CO Oxidation                           | K03518              | coxS; aerobic carbon-monoxide dehydrogenase small subunit [EC:1.2.5.3]                                    |
|                                        | K03519              | coxM, cutM; aerobic carbon-monoxide dehydrogenase medium subunit [EC:1.2.5.3]                             |
|                                        | K03520              | coxL, cutL; aerobic carbon-monoxide dehydrogenase large subunit [EC:1.2.5.3]                              |

**SuppTab 5.** The results of the radiocarbon dating of LS-C19 and JS-c core included in lake-depth modelling.

| Depth<br>bsl<br>[cm]                     | Laborator<br>y<br>code | <sup>14</sup> C date<br>[ <sup>14</sup> C BP] | Calibrated age - 1σ<br>range<br>[cal BCE/CE]<br>68.3% probability                | Calibrated age - 2σ<br>range<br>[cal BCE/CE]<br>95.4% probability | Dated material                                    |
|------------------------------------------|------------------------|-----------------------------------------------|----------------------------------------------------------------------------------|-------------------------------------------------------------------|---------------------------------------------------|
| LS-C19                                   |                        |                                               |                                                                                  |                                                                   |                                                   |
| 55                                       | Poz-123835             | 560 ± 30<br>BP                                | 1326 CE (34.9%)<br>1351 CE<br>1394 CE (33.4%)<br>1414 CE                         | 1312 CE (48.6%)<br>1362 CE<br>1386 CE (46.9%)<br>1428 CE          | Terrestrial plant<br>macrofossil                  |
| 65                                       | Poz-123833             | 1345 ± 30<br>BP                               | 650 CE (55.4%) 680<br>CE<br>747 CE (12.9%) 758<br>CE                             | 643 CE (68.3%) 705<br>CE<br>738 CE (27.1%) 774<br>CE              | Terrestrial plant<br>macrofossil<br>(hemp fibres) |
| 93                                       | Poz-123836             | 1980 ± 35<br>BP                               | 33 BCE (10.7%) 16<br>BCE<br>6 CE (54.4%) 78<br>CE<br>101 CE (3.2%) 106<br>CE     | 45 BCE (95.4%)<br>122 CE                                          | Terrestrial insect<br>macrofossil                 |
| JS-c                                     |                        |                                               |                                                                                  |                                                                   |                                                   |
| 852 (depth<br>bwl)<br>102 (depth<br>bsl) | Poz-40810              | 1595 ± 35<br>BP                               | 430 CE (10.1%) 442<br>CE<br>448 CE (25.0%) 480<br>CE<br>494 CE (33.1%) 536<br>CE | 414 CE (95.4%) 552<br>CE                                          | Terrestrial plant<br>macrofossil                  |

bwl – below water level

bsl – below sediment level

*Comment:*

Sediments of LS-C19 core taken with UWITEC sampler (with hammer application) were in the bottommost section more compacted than JS-c, sampled with Instorf corer. Both cores were correlated based on LOI, pollen and Cladocera data.

### **Supplementary References:**

- Battarbee, R.W., 1986. Diatom analysis. In: Berglund, B.E. (Ed.), Handbook of Holocene Palaeoecology and Palaeohydrology. John Wiley and Sons. Ltd. London, pp. 527-570.
- Hustedt, F. (1937–39). Systematische und ökologische Untersuchungen über die Diatomeenflora von Java, Bali und Sumatra III. Die ökologischen Faktoren und ihr Einfluss auf die Diatomeenflora. – Archiv für Hydrobiologie Supplement, 15: 131-177, 187-295, 393-506, 638-790, 16: 274-344.
- Round, F.E., 1981. The ecology of algae. Cambridge University Press, Cambridge.
- Flössner D. (2000) Die Haplopoda und Cladocera (ohne Bosminidae) Mitteleuropas. Backhuys Publishers, Leiden
- Bjerring, R., Becares, E., Declerck, S., Gross, E. M., Hansson, L. A., Kairesalo, T., ... & Jeppesen, E. (2009). Subfossil Cladocera in relation to contemporary environmental variables in 54 Pan-European lakes. *Freshwater Biology*, 54(11), 2401-2417.
- Błędzki, L. A., & Rybak, J. I. (2016). *Freshwater Crustacean Zooplankton of Europe: Cladocera & Copepoda (Calanoida, Cyclopoida) Key to species identification, with notes on ecology, distribution, methods and introduction to data analysis.* Springer.
