# Supplementary material for: Lake microbiome and trophy fluctuations of the ancient hemp rettery
Source: Sci Rep. 2022 May 25;12:8846. doi: 10.1038/s41598-022-12761-w (PMC9132974; doi:10.1038/s41598-022-12761-w)
Supplement: Supplementary file 2 — Dataset S1. [file 41598_2022_12761_MOESM2_ESM.xlsx]

## Sheet: LOI
depth	crucible 105°C	crucible with dry sediment 105°C	dry sediment 105°C	crucible with ignified sediment 550°C/4h	dry sediment 550°C/4h	organic matter LOI 550°C	crucible with ignified sediment 950°C/2h	ignified sediment 950°C/2h	LOI 950°C	carbonates (LOI 950°C * 2,274)	ash
[cm]	[g]	[g]	[g]	[g]	[g]	[%]	[g]	[g]	[%]	[%]	[%]
16	5.6429	6.0289	0.386	5.9365	0.2936	23.9378	5.8329	0.19	26.8394	61.0327	15.0294
18	6.0807	6.5785	0.4978	6.4575	0.3768	24.307	6.3195	0.2388	27.722	63.0398	12.6533
20	6.0327	6.7695	0.7372	6.5824	0.5497	25.4341	6.3773	0.3446	27.8215	63.2661	11.2999
22	5.8301	6.3476	0.5175	6.2229	0.3928	24.0966	6.074	0.2439	28.7729	65.4297	10.4737
23	5.5353	6.0094	0.4741	5.9028	0.3675	22.4847	5.7617	0.2264	29.7617	67.678	9.83729
24	5.8664	6.7562	0.8898	6.5706	0.7042	20.8586	6.3003	0.4339	30.3776	69.0787	10.0627
25	5.5849	6.0329	0.448	5.9496	0.3647	18.5937	5.8086	0.2237	31.4732	71.5701	9.83616
26	6.834	7.4785	0.6445	7.3633	0.5293	17.8743	7.1583	0.3243	31.8076	72.3305	9.79519
28	5.973	6.4617	0.4887	6.3851	0.4121	15.6742	6.2253	0.2523	32.699	74.3575	9.96824
30	5.6502	6.4804	0.8301	6.3615	0.7113	14.3115	6.0863	0.4361	33.1526	75.3891	10.2994
32	5.6434	6.0846	0.4412	6.0192	0.3758	14.8232	5.8787	0.2353	31.845	72.4155	12.7613
34	6.0267	6.4716	0.4449	6.3913	0.3646	18.049	6.2673	0.2406	27.8714	63.3796	18.5714
35	5.6429	6.4372	0.7941	6.2767	0.6338	20.1864	6.0805	0.4376	24.7072	56.1842	23.6294
37	6.032	6.4922	0.4602	6.3949	0.3629	21.143	6.2833	0.2513	24.2503	55.1452	23.7118
39	5.534	5.9821	0.4481	5.8933	0.3593	19.817	5.7761	0.2421	26.1549	59.4762	20.7068
40	5.5337	6.1535	0.6199	6.0176	0.4839	21.939	5.8657	0.332	24.504	55.722	22.339
42	6.078	6.5346	0.4566	6.4325	0.3545	22.3609	6.3237	0.2457	23.8283	54.1855	23.4535
44	7.6585	8.1129	0.4544	8.0091	0.3506	22.8433	7.9092	0.2507	21.985	49.994	27.1627
45	6.0265	6.7019	0.6754	6.5374	0.5109	24.3559	6.4018	0.3753	20.077	45.6551	29.989
47	5.9245	6.3897	0.4652	6.2764	0.3519	24.3551	6.1742	0.2497	21.969	49.9576	25.6873
49	5.8756	6.3731	0.4975	6.2961	0.4205	15.4774	6.1526	0.277	28.8442	65.5918	18.9309
50	6.9673	7.894	0.927	7.768	0.8007	13.6246	7.484	0.5167	30.6365	69.6673	16.7081
51	5.7887	6.2561	0.4674	6.2006	0.4119	11.8742	6.0475	0.2588	32.7557	74.4864	13.6394
53	5.7256	6.2065	0.4809	6.1505	0.4249	11.6448	5.9898	0.2642	33.4165	75.9891	12.366
55	6.8349	7.7431	0.9086	7.6391	0.8042	11.4902	7.3134	0.4785	35.8464	81.5146	6.99518
56	5.6495	6.1391	0.4896	6.0818	0.4323	11.7034	5.9006	0.2511	37.0098	84.1603	4.13627
58	5.872	6.3446	0.4726	6.2605	0.3885	17.7952	6.0968	0.2248	34.6382	78.7672	3.43762
60	5.726	6.5821	0.8565	6.3477	0.6217	27.4139	6.0985	0.3725	29.0952	66.1624	6.42372
61	5.8661	6.3331	0.467	6.235	0.3689	21.0064	6.0831	0.217	32.5268	73.9659	5.02771
63	5.5351	6.3282	0.7927	6.1434	0.6083	23.2623	5.8973	0.3622	31.0458	70.5981	6.1396
64	6.0904	6.6527	0.5623	6.473	0.3826	31.958	6.3276	0.2372	25.8581	58.8013	9.24069
66	5.9244	6.5531	0.6291	6.4088	0.4844	23.0011	6.224	0.2996	29.3753	66.7994	10.1995
67	5.8423	6.3833	0.541	6.2612	0.4189	22.5693	6.1016	0.2593	29.5009	67.0851	10.3456
68	6.9665	7.3353	0.3688	7.2512	0.2847	22.8037	7.1437	0.1772	29.1486	66.2839	10.9124
70	5.5853	6.0737	0.4885	5.9769	0.3916	19.8362	5.8242	0.2389	31.259	71.0829	9.0809
72	5.842	6.2789	0.4369	6.2006	0.3586	17.9217	6.0531	0.2111	33.7606	76.7716	5.30671
74	5.7685	6.2309	0.4624	6.1533	0.3848	16.782	5.9928	0.2243	34.7102	78.931	4.28698
76	5.7889	6.3633	0.5747	6.239	0.4501	21.6809	6.0563	0.2674	31.7905	72.2916	6.02753
78	5.5232	6.0116	0.4884	5.9134	0.3902	20.1065	5.7559	0.2327	32.2482	73.3323	6.56122
80	5.8297	6.539	0.7089	6.4062	0.5765	18.6768	6.1744	0.3447	32.6985	74.3565	6.96668
81	6.0904	6.5579	0.4675	6.4672	0.3768	19.4011	6.32	0.2296	31.4866	71.6006	8.99833
83	5.6344	6.0724	0.438	5.9697	0.3353	23.4475	5.8492	0.2148	27.5114	62.561	13.9916
85	5.523	6.2652	0.7427	6.1257	0.6027	18.8501	5.8833	0.3603	32.6377	74.2181	6.93179
87	5.872	6.3009	0.4289	6.1887	0.3167	26.1599	6.0689	0.1969	27.9319	63.5172	10.3229
88	5.5237	5.9381	0.4144	5.829	0.3053	26.3272	5.7135	0.1898	27.8716	63.3801	10.2927
89	5.9732	6.4265	0.4533	6.3029	0.3297	27.2667	6.1796	0.2064	27.2005	61.854	10.8793
90	6.8347	7.3192	0.4845	7.1866	0.3519	27.3684	7.056	0.2213	26.9556	61.2971	11.3345
91	5.842	6.2731	0.4311	6.163	0.321	25.5393	6.0424	0.2004	27.9749	63.615	10.8457
93	7.6586	8.0876	0.4283	7.9622	0.3036	29.1151	7.8507	0.1914	26.1966	59.571	11.3138
95	6.0788	6.6727	0.5943	6.5291	0.4503	24.2302	6.3556	0.2772	29.1267	66.2341	9.53569
