# Supplementary material for: Lake microbiome and trophy fluctuations of the ancient hemp rettery
Source: Sci Rep. 2022 May 25;12:8846. doi: 10.1038/s41598-022-12761-w (PMC9132974; doi:10.1038/s41598-022-12761-w)
Supplement: Supplementary file 3 — Dataset S2. [file 41598_2022_12761_MOESM3_ESM.xlsx]

## Sheet: a. ReadsQuality
Sample	Number of reads	Number of base pairs	Avg. read length	Number of reads (reads min. 100 bp)	Number of base pairs (reads min. 100 bp)	Avg. read length (reads min. 100 bp)
LS-35-1_R1	88113343	12926791426	147	85664470	12617395872	147
LS-35-1_R2	88113343	12773138968	145	85664470	12577867690	147
LS-35-2_R1	73437652	10785069080	147	71468313	10533692730	147
LS-35-2_R2	73437652	10657047834	145	71468313	10500359750	147
LS-55-1_R1	63599696	9429755625	148	62437128	9268573870	148
LS-55-1_R2	63599696	9316432073	146	62437128	9225164692	148
LS-55-2_R1	67342137	9994446076	148	66086820	9819385426	149
LS-55-2_R2	67342137	9869158463	146	66086820	9771807174	148
LS-63-1_R1	71353994	10432125614	146	69428811	10197410176	147
LS-63-1_R2	71353994	10333484913	145	69428811	10173674454	147
LS-63-2_R1	72409041	10596624266	146	70446057	10355043098	147
LS-63-2_R2	72409041	10488612415	145	70446057	10327365814	147
LS-65-1_R1	68557473	10183550170	148	67306330	10008388660	149
LS-65-1_R2	68557473	10056969469	147	67306330	9960122084	148
LS-65-2_R1	64479881	9585614822	149	63305364	9422499184	149
LS-65-2_R2	64479881	9469797457	147	63305364	9378639388	148
LS-67-1_R1	62878842	9192520931	146	61083377	8974404962	147
LS-67-1_R2	62878842	9102696010	145	61083377	8953196614	147
LS-67-2_R1	56701200	8277815718	146	55069700	8080182692	147
LS-67-2_R2	56701200	8195046017	144	55069700	8058910938	146
LS-76-1_R1	67219051	9960593457	148	66020747	9796815168	148
LS-76-1_R2	67219051	9849003677	146	66020747	9753523590	148
LS-76-2_R1	69663857	10348180447	148	68356989	10165766630	149
LS-76-2_R2	69663857	10216641987	147	68356989	10115745626	148
LS-85-1_R1	59198116	8587018223	145	57252236	8362759806	146
LS-85-1_R2	59198116	8506969738	144	57252236	8342772242	146
LS-85-2_R1	59538309	8669242187	146	57725097	8455439776	146
LS-85-2_R2	59538309	8586208601	144	57725097	8434451400	146
LS-93-1_R1	60588936	8854683852	146	58892958	8648054816	147
LS-93-1_R2	60588936	8764339567	145	58892958	8624898524	146
LS-93-2_R1	69848966	10193776341	146	67748255	9946673284	147
LS-93-2_R2	69848966	10193776341	145	67748255	9923173652	146

## Sheet: b. Contigs
Sample	Number of contigs	Maximum contig length	Number of base pairs	Avg. Length	N50
LS-35-1	4560710	336970	2646721134	580	571
LS-35-2	3930217	234104	2236839371	569	556
LS-55-1	2822239	576592	1761893547	624	620
LS-55-2	3036413	801018	1904814515	627	629
LS-63-1	2964208	346912	1805614818	609	611
LS-63-2	3042655	363764	1847089604	607	607
LS-65-1	2892150	419895	1811663887	626	633
LS-65-2	2791548	420022	1729502251	619	622
LS-67-1	2718986	230456	1677012661	616	622
LS-67-2	2440951	222512	1490148263	610	611
LS-76-1	2586176	685055	1644319545	635	645
LS-76-2	2782631	569750	1766346368	634	649
LS-85-1	2368565	259181	1471214176	621	627
LS-85-2	2471395	272280	1542478549	624	629
LS-93-1	2371598	277408	1508715006	636	650
LS-93-2	3064551	241954	1888380240	616	622

## Sheet: c. ORF_and_KEGG
Sample	Number of ORFs	KEGG annotations
LS-35-1	6038193	2217476
LS-35-2	5183102	1875926
LS-55-1	3866293	1325687
LS-55-2	4201665	1378624
LS-63-1	4040497	1434855
LS-63-2	4160836	1482232
LS-65-1	4052587	1291767
LS-65-2	3874592	1285914
LS-67-1	3814810	1134165
LS-67-2	3411664	1029447
LS-76-1	3617461	1177782
LS-76-2	3942868	1173870
LS-85-1	3239368	1217221
LS-85-2	3387117	1266345
LS-93-1	3312484	1135238
LS-93-2	4215659	1478097
