# Supplementary material for: Lake microbiome and trophy fluctuations of the ancient hemp rettery
Source: Sci Rep. 2022 May 25;12:8846. doi: 10.1038/s41598-022-12761-w (PMC9132974; doi:10.1038/s41598-022-12761-w)
Supplement: Supplementary file 4 — Dataset S3. [file 41598_2022_12761_MOESM4_ESM.xlsx]

## Sheet: a. phyla
Phyla	nHR: mean rel. freq. (%)	nHR: std. dev. (%)	HR: mean rel. freq. (%)	HR: std. dev. (%)	p-values	p-values (corrected)	Difference between means	95.0% lower CI	95.0% upper CI	LS-35-1	LS-35-1: parent seq. count	LS-35-1: rel. freq. (%)	LS-35-2	LS-35-2: parent seq. count	LS-35-2: rel. freq. (%)	LS-55-1	LS-55-1: parent seq. count	LS-55-1: rel. freq. (%)	LS-55-2	LS-55-2: parent seq. count	LS-55-2: rel. freq. (%)	LS-76-1	LS-76-1: parent seq. count	LS-76-1: rel. freq. (%)	LS-76-2	LS-76-2: parent seq. count	LS-76-2: rel. freq. (%)	LS-93-1	LS-93-1: parent seq. count	LS-93-1: rel. freq. (%)	LS-93-2	LS-93-2: parent seq. count	LS-93-2: rel. freq. (%)	LS-63-1	LS-63-1: parent seq. count	LS-63-1: rel. freq. (%)	LS-63-2	LS-63-2: parent seq. count	LS-63-2: rel. freq. (%)	LS-65-1	LS-65-1: parent seq. count	LS-65-1: rel. freq. (%)	LS-65-2	LS-65-2: parent seq. count	LS-65-2: rel. freq. (%)	LS-67-1	LS-67-1: parent seq. count	LS-67-1: rel. freq. (%)	LS-67-2
Proteobacteria	39.6378	2.13325	34.0183	3.92955	0.00693684	0.00693684	5.61944	1.89125	9.34763	2.93572e+08	7.97958e+08	36.7904	2.98773e+08	7.87905e+08	37.9199	3.12482e+08	7.74826e+08	40.3293	2.99836e+08	7.71792e+08	38.8493	3.2533e+08	7.73528e+08	42.0579	3.19898e+08	7.66931e+08	41.7115	2.89326e+08	7.80506e+08	37.069	3.18688e+08	7.52068e+08	42.3749	2.22955e+08	7.54681e+08	29.543	2.21083e+08	7.52701e+08	29.372	2.23942e+08	7.23723e+08	30.9431	2.26413e+08	7.2113e+08	31.3971	2.63656e+08	7.24756e+08	36.3786	256784143
Chloroflexi	24.7795	2.84289	28.548	1.53944	0.0106292	0.0106292	-3.76851	-6.46468	-1.07234	2.2463e+08	7.97958e+08	28.1505	2.22218e+08	7.87905e+08	28.2036	1.59114e+08	7.74826e+08	20.5355	1.67e+08	7.71792e+08	21.638	1.77886e+08	7.73528e+08	22.9968	1.80723e+08	7.66931e+08	23.5645	2.16299e+08	7.80506e+08	27.7126	1.91285e+08	7.52068e+08	25.4346	2.33582e+08	7.54681e+08	30.9511	2.34127e+08	7.52701e+08	31.1049	1.99745e+08	7.23723e+08	27.5996	2.04117e+08	7.2113e+08	28.3051	1.91131e+08	7.24756e+08	26.3718	202626132
Actinobacteria	6.83713	1.63817	4.75217	1.13806	0.0165766	0.0165766	2.08496	0.44929	3.72063	4.37994e+07	7.97958e+08	5.48893	3.88751e+07	7.87905e+08	4.93399	5.46747e+07	7.74826e+08	7.05638	5.49175e+07	7.71792e+08	7.11559	7.43822e+07	7.73528e+08	9.61596	6.59574e+07	7.66931e+08	8.60018	5.66727e+07	7.80506e+08	7.26102	3.47828e+07	7.52068e+08	4.62496	2.80727e+07	7.54681e+08	3.71981	2.8007e+07	7.52701e+08	3.72086	2.96452e+07	7.23723e+08	4.09621	2.66167e+07	7.2113e+08	3.69097	5.00479e+07	7.24756e+08	6.90548	44226807
Planctomycetes	10.6079	1.65412	12.8322	1.53574	0.0207554	0.0207554	-2.22429	-4.05497	-0.393598	67837618	7.97958e+08	8.5014	6.46637e+07	7.87905e+08	8.20705	1.02335e+08	7.74826e+08	13.2074	9.78534e+07	7.71792e+08	12.6787	8.08654e+07	7.73528e+08	10.4541	7.6901e+07	7.66931e+08	10.0271	8.31384e+07	7.80506e+08	10.6519	8.37477e+07	7.52068e+08	11.1357	1.04477e+08	7.54681e+08	13.8439	1.04074e+08	7.52701e+08	13.8267	1.07165e+08	7.23723e+08	14.8074	1.06019e+08	7.2113e+08	14.7018	7.781e+07	7.24756e+08	10.736	79504563
Bacteroidetes	4.21152	1.05657	5.80652	1.43732	0.034413	0.034413	-1.595	-3.05328	-0.136713	4.69368e+07	7.97958e+08	5.88211	4.65524e+07	7.87905e+08	5.90837	3.10767e+07	7.74826e+08	4.01081	3.44581e+07	7.71792e+08	4.46468	2.31357e+07	7.73528e+08	2.99093	2.52891e+07	7.66931e+08	3.29744	2.74694e+07	7.80506e+08	3.51944	2.72127e+07	7.52068e+08	3.61838	5.64965e+07	7.54681e+08	7.48615	5.41072e+07	7.52701e+08	7.18842	5.08685e+07	7.23723e+08	7.02873	4.62432e+07	7.2113e+08	6.4126	4.20394e+07	7.24756e+08	5.80048	38194612
[truncated: 8 more columns]

## Sheet: b. class-subclass
Class-Subclass	nHR: mean rel. freq. (%)	nHR: std. dev. (%)	HR: mean rel. freq. (%)	HR: std. dev. (%)	p-values	p-values (corrected)	Difference between means	95.0% lower CI	95.0% upper CI	LS-35-1	LS-35-1: parent seq. count	LS-35-1: rel. freq. (%)	LS-35-2	LS-35-2: parent seq. count	LS-35-2: rel. freq. (%)	LS-55-1	LS-55-1: parent seq. count	LS-55-1: rel. freq. (%)	LS-55-2	LS-55-2: parent seq. count	LS-55-2: rel. freq. (%)	LS-76-1	LS-76-1: parent seq. count	LS-76-1: rel. freq. (%)	LS-76-2	LS-76-2: parent seq. count	LS-76-2: rel. freq. (%)	LS-93-1	LS-93-1: parent seq. count	LS-93-1: rel. freq. (%)	LS-93-2	LS-93-2: parent seq. count	LS-93-2: rel. freq. (%)	LS-63-1	LS-63-1: parent seq. count	LS-63-1: rel. freq. (%)	LS-63-2	LS-63-2: parent seq. count	LS-63-2: rel. freq. (%)	LS-65-1	LS-65-1: parent seq. count	LS-65-1: rel. freq. (%)	LS-65-2	LS-65-2: parent seq. count	LS-65-2: rel. freq. (%)	LS-67-1	LS-67-1: parent seq. count	LS-67-1: rel. freq. (%)	LS-67-2
Betaproteobacteria	1.6389	0.269235	0.913673	0.174489	6.4084e-05	6.4084e-05	0.725225	0.461011	0.989439	9.48766e+06	5.91616e+08	1.60369	9.95009e+06	5.84189e+08	1.70323	1.10799e+07	5.92763e+08	1.8692	1.08172e+07	5.88114e+08	1.8393	1.11441e+07	5.98946e+08	1.86062	1.0698e+07	5.89095e+08	1.81601	6.35255e+06	5.86675e+08	1.08281	7.6076e+06	5.69294e+08	1.33632	3.59999e+06	5.54315e+08	0.649449	3.52867e+06	5.52499e+08	0.638674	4.78307e+06	5.33037e+08	0.897324	4.64333e+06	5.30507e+08	0.875263	6.2299e+06	5.54647e+08	1.12322	5709873
Burkholderiales	1.01399	0.167709	0.593617	0.112802	0.000125654	0.000125654	0.420374	0.254316	0.586432	5769124	5.91616e+08	0.975147	5.98456e+06	5.84189e+08	1.02442	6840815	5.92763e+08	1.15406	6.71581e+06	5.88114e+08	1.14192	6945722	5.98946e+08	1.15966	6696383	5.89095e+08	1.13672	3841975	5.86675e+08	0.654873	4.92511e+06	5.69294e+08	0.865127	2.34303e+06	5.54315e+08	0.42269	2.28706e+06	5.52499e+08	0.413948	3.13211e+06	5.33037e+08	0.587598	3.05817e+06	5.30507e+08	0.576462	4.06259e+06	5.54647e+08	0.732464	3735260
Myxococcales	0.562636	0.215524	0.159443	0.0144388	0.00163521	0.00163521	0.403193	0.210485	0.595901	4.67648e+06	5.91616e+08	0.79046	4.3577e+06	5.84189e+08	0.74594	4685119	5.92763e+08	0.790386	3.79611e+06	5.88114e+08	0.645472	3.55647e+06	5.98946e+08	0.593789	2766023	5.89095e+08	0.469538	1404046	5.86675e+08	0.239323	1.28764e+06	5.69294e+08	0.226182	792084	5.54315e+08	0.142894	788370	5.52499e+08	0.142691	778776	5.33037e+08	0.146102	800617	5.30507e+08	0.150916	980153	5.54647e+08	0.176716	924184
Xanthomonadales	0.327214	0.168964	0.0644845	0.0672359	0.00394224	0.00394224	0.262729	0.107664	0.417794	3.11005e+06	5.91616e+08	0.525688	3.11475e+06	5.84189e+08	0.533176	2.89063e+06	5.92763e+08	0.487653	2.40231e+06	5.88114e+08	0.408478	1.42543e+06	5.98946e+08	0.23799	1.0145e+06	5.89095e+08	0.172213	581112	5.86675e+08	0.0990519	873641	5.69294e+08	0.153461	0	5.54315e+08	0	0	5.52499e+08	0	0	5.33037e+08	0	0	5.30507e+08	0	892681	5.54647e+08	0.160946	817507
Micrococcales	0.112829	0.0265958	0.0447402	0.0451051	0.00528828	0.00528828	0.0680887	0.0246888	0.111489	496323	5.91616e+08	0.0838927	512503	5.84189e+08	0.0877291	771820	5.92763e+08	0.130207	810341	5.88114e+08	0.137786	786253	5.98946e+08	0.131273	906723	5.89095e+08	0.153918	561864	5.86675e+08	0.095771	467130	5.69294e+08	0.0820544	0	5.54315e+08	0	0	5.52499e+08	0	0	5.33037e+08	0	0	5.30507e+08	0	560189	5.54647e+08	0.100999	506590
Chromatiales	0.0890782	0.037276	0.0223359	0.0386888	0.00541062	0.00541062	0.0667423	0.0231847	0.1103	507611	5.91616e+08	0.0858009	525077	5.84189e+08	0.0898814	771741	5.92763e+08	0.130194	702964	5.88114e+08	0.119529	640490	5.98946e+08	0.106936	594309	5.89095e+08	0.100885	465819	5.86675e+08	0.0793999	0	5.69294e+08	0	0	5.54315e+08	0	0	5.52499e+08	0	0	5.33037e+08	0	0	5.30507e+08	0	499700	5.54647e+08	0.0900933	482715
Flavobacteriales	0.219346	0.0257643	0.386323	0.122397	0.00833986	0.00833986	-0.166977	-0.276951	-0.0570034	1.39267e+06	5.91616e+08	0.235401	1.39182e+06	5.84189e+08	0.238249	1.16421e+06	5.92763e+08	0.196403	1.26898e+06	5.88114e+08	0.215772	1.22243e+06	5.98946e+08	0.204098	1.52177e+06	5.89095e+08	0.258323	1.01227e+06	5.86675e+08	0.172544	1.33201e+06	5.69294e+08	0.233977	2.54999e+06	5.54315e+08	0.460025	2384607	5.52499e+08	0.431603	2.6599e+06	5.33037e+08	0.499009	2.34071e+06	5.30507e+08	0.441222	2.55619e+06	5.54647e+08	0.460868	2419785
Flavobacteriia	0.222499	0.0265169	0.393375	0.125462	0.00840712	0.00840712	-0.170877	-0.28361	-0.0581436	1.41632e+06	5.91616e+08	0.239398	1.41342e+06	5.84189e+08	0.241946	1.18224e+06	5.92763e+08	0.199446	1.28832e+06	5.88114e+08	0.219059	1.23799e+06	5.98946e+08	0.206695	1.54515e+06	5.89095e+08	0.262292	1.01998e+06	5.86675e+08	0.173858	1.35091e+06	5.69294e+08	0.237296	2.59492e+06	5.54315e+08	0.468131	2.42985e+06	5.52499e+08	0.439792	2.71946e+06	5.33037e+08	0.510182	2.38839e+06	5.30507e+08	0.450209	2.5976e+06	5.54647e+08	0.468334	2467434
Phycisphaerae	0.394198	0.0478085	0.527952	0.103088	0.0111397	0.0111397	-0.133754	-0.229612	-0.0378953	2.26226e+06	5.91616e+08	0.382388	2.01578e+06	5.84189e+08	0.345056	2.63413e+06	5.92763e+08	0.444381	2.59881e+06	5.88114e+08	0.441889	1.9415e+06	5.98946e+08	0.324153	2.19858e+06	5.89095e+08	0.373213	2.20487e+06	5.86675e+08	0.375825	2.65678e+06	5.69294e+08	0.466681	3.37162e+06	5.54315e+08	0.60825	3.44896e+06	5.52499e+08	0.624246	3.44148e+06	5.33037e+08	0.645636	3.35435e+06	5.30507e+08	0.632292	2.22912e+06	5.54647e+08	0.401898	2117781
Dehalococcoidia	3.36191	0.918937	4.41492	0.304583	0.0192855	0.0192855	-1.053	-1.88791	-0.218097	1.63827e+07	5.91616e+08	2.76915	18075788	5.84189e+08	3.09417	1.29476e+07	5.92763e+08	2.18428	1.48173e+07	5.88114e+08	2.51946	1.9755e+07	5.98946e+08	3.29829	2.14196e+07	5.89095e+08	3.63602	3.07478e+07	5.86675e+08	5.24104	2.36422e+07	5.69294e+08	4.15291	25605006	5.54315e+08	4.61921	2.57215e+07	5.52499e+08	4.65548	2.32401e+07	5.33037e+08	4.35994	2.40445e+07	5.30507e+08	4.53237	2.03548e+07	5.54647e+08	3.66986	23498973
Rhodobacterales	0.0769791	0.0454274	0.128185	0.0249972	0.024325	0.024325	-0.0512055	-0.0943964	-0.00801446	0	5.91616e+08	0	0	5.84189e+08	0	548981	5.92763e+08	0.092614	604547	5.88114e+08	0.102794	604804	5.98946e+08	0.100978	720294	5.89095e+08	0.122271	521876	5.86675e+08	0.088955	616092	5.69294e+08	0.10822	603362	5.54315e+08	0.108848	631915	5.52499e+08	0.114374	840964	5.33037e+08	0.157768	893607	5.30507e+08	0.168444	777882	5.54647e+08	0.140248	748671
Gammaproteobacteria	1.52533	0.376946	1.1133	0.184873	0.0262916	0.0262916	0.412023	0.0593124	0.764734	7.83935e+06	5.91616e+08	1.32507	8.022e+06	5.84189e+08	1.37319	1.30526e+07	5.92763e+08	2.20199	1.00236e+07	5.88114e+08	1.70436	1.17495e+07	5.98946e+08	1.9617	8.55603e+06	5.89095e+08	1.4524	5.94863e+06	5.86675e+08	1.01396	6.66038e+06	5.69294e+08	1.16994	5.39938e+06	5.54315e+08	0.974063	5.2298e+06	5.52499e+08	0.94657	6.05791e+06	5.33037e+08	1.13649	5.78073e+06	5.30507e+08	1.08966	8.00526e+06	5.54647e+08	1.44331	7536836
Streptomycetales	0.0900519	0.0375465	0.0352431	0.045543	0.0282286	0.0282286	0.0548088	0.00679649	0.102821	468934	5.91616e+08	0.0792634	0	5.84189e+08	0	719486	5.92763e+08	0.121378	658547	5.88114e+08	0.111976	659908	5.98946e+08	0.110178	731374	5.89095e+08	0.124152	506861	5.86675e+08	0.0863956	495690	5.69294e+08	0.0870711	0	5.54315e+08	0	0	5.52499e+08	0	476204	5.33037e+08	0.0893378	0	5.30507e+08	0	534127	5.54647e+08	0.0963004	524737
Nitrosomonadales	0.105382	0.0197208	0.0577415	0.0450794	0.0291888	0.0291888	0.04764	0.00595759	0.0893225	541532	5.91616e+08	0.0915345	558888	5.84189e+08	0.0956691	530449	5.92763e+08	0.0894875	559503	5.88114e+08	0.0951351	800289	5.98946e+08	0.133616	841135	5.89095e+08	0.142784	521641	5.86675e+08	0.0889148	602944	5.69294e+08	0.105911	0	5.54315e+08	0	0	5.52499e+08	0	522353	5.33037e+08	0.0979957	0	5.30507e+08	0	543884	5.54647e+08	0.0980593	536890
Rhodocyclales	0.0419712	0.0421181	0	0	0.0335928	0.0335928	0.0419712	0.00432837	0.079614	0	5.91616e+08	0	0	5.84189e+08	0	485014	5.92763e+08	0.0818225	538699	5.88114e+08	0.0915976	467050	5.98946e+08	0.0779786	497023	5.89095e+08	0.0843705	0	5.86675e+08	0	0	5.69294e+08	0	0	5.54315e+08	0	0	5.52499e+08	0	0	5.33037e+08	0	0	5.30507e+08	0	0	5.54647e+08	0	0
Cytophagia	0.117774	0.0111783	0.146778	0.0303228	0.0419985	0.0419985	-0.0290036	-0.0566984	-0.00130875	770595	5.91616e+08	0.130253	786487	5.84189e+08	0.134629	709199	5.92763e+08	0.119643	724195	5.88114e+08	0.123138	634649	5.98946e+08	0.105961	688564	5.89095e+08	0.116885	578955	5.86675e+08	0.0986841	643296	5.69294e+08	0.112999	898391	5.54315e+08	0.162072	878962	5.52499e+08	0.159088	977907	5.33037e+08	0.18346	805304	5.30507e+08	0.151799	932559	5.54647e+08	0.168136	853075
Cytophagales	0.117446	0.0111862	0.146214	0.0301435	0.0424181	0.0424181	-0.0287681	-0.0563096	-0.00122662	769101	5.91616e+08	0.13	784458	5.84189e+08	0.134282	708699	5.92763e+08	0.119559	721891	5.88114e+08	0.122747	632826	5.98946e+08	0.105657	686542	5.89095e+08	0.116542	577440	5.86675e+08	0.098426	639653	5.69294e+08	0.112359	895462	5.54315e+08	0.161544	875299	5.52499e+08	0.158425	972693	5.33037e+08	0.182481	800234	5.30507e+08	0.150843	929674	5.54647e+08	0.167615	851347
[truncated: 8 more columns]
