# Supplementary material for: Lake microbiome and trophy fluctuations of the ancient hemp rettery
Source: Sci Rep. 2022 May 25;12:8846. doi: 10.1038/s41598-022-12761-w (PMC9132974; doi:10.1038/s41598-022-12761-w)
Supplement: Supplementary file 5 — Dataset S4. [file 41598_2022_12761_MOESM5_ESM.xlsx]

## Sheet: STAMP_KEGG
KEGG	nHR: mean rel. freq. (%)	nHR: std. dev. (%)	HR: mean rel. freq. (%)	HR: std. dev. (%)	p-values	p-values (corrected)	Difference between means	95.0% lower CI	95.0% upper CI	LS-35-1	LS-35-1: parent seq. count	LS-35-1: rel. freq. (%)	LS-35-2	LS-35-2: parent seq. count	LS-35-2: rel. freq. (%)	LS-55-1	LS-55-1: parent seq. count	LS-55-1: rel. freq. (%)	LS-55-2	LS-55-2: parent seq. count	LS-55-2: rel. freq. (%)	LS-76-1	LS-76-1: parent seq. count	LS-76-1: rel. freq. (%)	LS-76-2	LS-76-2: parent seq. count	LS-76-2: rel. freq. (%)	LS-93-1	LS-93-1: parent seq. count	LS-93-1: rel. freq. (%)	LS-93-2	LS-93-2: parent seq. count	LS-93-2: rel. freq. (%)	LS-63-1	LS-63-1: parent seq. count	LS-63-1: rel. freq. (%)	LS-63-2	LS-63-2: parent seq. count	LS-63-2: rel. freq. (%)	LS-65-1	LS-65-1: parent seq. count	LS-65-1: rel. freq. (%)	LS-65-2	LS-65-2: parent seq. count	LS-65-2: rel. freq. (%)	LS-67-1	LS-67-1: parent seq. count	LS-67-1: rel. freq. (%)	LS-67-2
K14274 xylonolactonase [EC:3.1.1.-]	0.00543212	0.00065329	0.00299915	0.000363882	3.31137e-06	0.00219933	0.00243297	0.00181062	0.00305532	2295	38517452	0.00595834	1663	28642163	0.00580613	1600	26103837	0.00612937	1648	27161364	0.00606744	1154	22945505	0.00502931	1213	22183832	0.00546795	1270	26358245	0.00481823	1201	28730741	0.00418019	791	26223346	0.0030164	850	26962296	0.00315255	606	21374961	0.00283509	702	20608942	0.00340629	578	20367957	0.00283779	405
K01601 ribulose-bisphosphate carboxylase large chain [EC:4.1.1.39]	0.00851542	0.00130562	0.00374864	0.000881031	3.21077e-06	0.0022658	0.00476678	0.00347296	0.00606061	3450	38517452	0.00895698	2214	28642163	0.00772986	2403	26103837	0.00920554	2597	27161364	0.00956138	2406	22945505	0.0104857	1983	22183832	0.00893894	1715	26358245	0.0065065	1936	28730741	0.00673843	743	26223346	0.00283335	754	26962296	0.0027965	719	21374961	0.00336375	586	20608942	0.00284343	827	20367957	0.0040603	729
K01621 xylulose-5-phosphate/fructose-6-phosphate phosphoketolase [EC:4.1.2.9 4.1.2.22]	0.0103459	0.00126301	0.00539721	0.000575423	3.17267e-06	0.00238818	0.00494868	0.00377636	0.006121	3860	38517452	0.0100214	2858	28642163	0.0099783	3026	26103837	0.0115922	2914	27161364	0.0107285	2894	22945505	0.0126125	2093	22183832	0.0094348	2703	26358245	0.0102549	2340	28730741	0.00814459	1500	26223346	0.00572009	1412	26962296	0.00523694	1055	21374961	0.00493568	1111	20608942	0.00539086	1277	20367957	0.00626965	849
K02931 large subunit ribosomal protein L5	0.0336313	0.000934774	0.0370602	0.000705791	3.14492e-06	0.00253637	-0.00342894	-0.00438518	-0.0024727	13165	38517452	0.0341793	9641	28642163	0.0336602	8447	26103837	0.0323592	8984	27161364	0.0330764	7831	22945505	0.0341287	7248	22183832	0.0326724	8818	26358245	0.0334544	10205	28730741	0.0355194	9673	26223346	0.036887	10026	26962296	0.0371853	8225	21374961	0.0384796	7523	20608942	0.0365036	7448	20367957	0.0365672	6584
K18009 meso-butanediol dehydrogenase / (S,S)-butanediol dehydrogenase / diacetyl reductase [EC:1.1.1.- 1.1.1.76 1.1.1.304]	0.0113501	0.000973753	0.00769171	0.000596658	2.60678e-06	0.00267574	0.00365839	0.00271438	0.0046024	4182	38517452	0.0108574	3173	28642163	0.0110781	3364	26103837	0.012887	3241	27161364	0.0119324	2759	22945505	0.0120241	2581	22183832	0.0116346	2904	26358245	0.0110174	2692	28730741	0.00936975	1921	26223346	0.00732553	2175	26962296	0.00806682	1616	21374961	0.00756025	1474	20608942	0.00715224	1612	20367957	0.00791439	1249
K11383 two-component system, NtrC family, sensor histidine kinase KinB [EC:2.7.13.3]	0.0188291	0.00199693	0.0263289	0.00186962	4.30579e-06	0.00270093	-0.00749984	-0.00971832	-0.00528136	7023	38517452	0.0182333	5286	28642163	0.0184553	4660	26103837	0.0178518	4724	27161364	0.0173924	3689	22945505	0.0160772	4114	22183832	0.018545	5742	26358245	0.0217845	6405	28730741	0.0222932	6157	26223346	0.0234791	6500	26962296	0.0241077	5554	21374961	0.0259837	5990	20608942	0.0290651	5608	20367957	0.0275334	5171
K02066 phospholipid/cholesterol/gamma-HCH transport system permease protein	0.048181	0.00355106	0.0351633	0.00262668	3.11217e-06	0.00270304	0.0130178	0.00940814	0.0166274	18202	38517452	0.0472565	13327	28642163	0.0465293	14048	26103837	0.0538158	13794	27161364	0.0507854	11826	22945505	0.0515395	10784	22183832	0.048612	11152	26358245	0.0423093	12814	28730741	0.0446003	8353	26223346	0.0318533	8664	26962296	0.0321338	7090	21374961	0.0331697	6981	20608942	0.0338736	7659	20367957	0.0376032	6428
K10762 putative replication protein	0.00190391	0.000325169	0.000566523	0.000332292	2.44273e-06	0.00275809	0.00133738	0.000960476	0.00171429	798	38517452	0.00207179	539	28642163	0.00188184	563	26103837	0.00215677	452	27161364	0.00166413	548	22945505	0.00238827	424	22183832	0.0019113	323	26358245	0.00122542	555	28730741	0.00193173	162	26223346	0.00061777	6	26962296	2.22533e-05	66	21374961	0.000308772	56	20608942	0.000271727	237	20367957	0.00116359	142
K18215 MFS transporter, DHA3 family, tetracycline resistance protein	0.00114524	0.000164059	0.000448539	0.000193428	4.78392e-06	0.00284291	0.000696704	0.000490581	0.000902828	451	38517452	0.0011709	314	28642163	0.00109629	274	26103837	0.00104965	337	27161364	0.00124073	275	22945505	0.00119849	305	22183832	0.00137488	328	26358245	0.00124439	226	28730741	0.000786614	78	26223346	0.000297445	122	26962296	0.000452484	78	21374961	0.000364913	43	20608942	0.000208647	159	20367957	0.000780638	44
K06726 D-ribose pyranase [EC:5.4.99.62]	0.000892906	0.000278894	0.00204309	0.000296213	3.03452e-06	0.00285523	-0.00115018	-0.0014801	-0.000820258	263	38517452	0.000682807	153	28642163	0.000534178	295	26103837	0.0011301	164	27161364	0.000603799	199	22945505	0.000867272	211	22183832	0.000951143	245	26358245	0.0009295	415	28730741	0.00144445	597	26223346	0.0022766	634	26962296	0.00235143	555	21374961	0.0025965	381	20608942	0.00184871	375	20367957	0.00184113	333
K16514 4-oxalomesaconate tautomerase [EC:5.3.2.8]	0.000442791	0.000100273	8.43598e-05	5.23127e-05	5.50121e-06	0.00295782	0.000358431	0.00026385	0.000453012	171	38517452	0.000443955	144	28642163	0.000502755	125	26103837	0.000478857	133	27161364	0.000489666	130	22945505	0.00056656	111	22183832	0.000500364	66	26358245	0.000250396	89	28730741	0.000309773	4	26223346	1.52536e-05	11	26962296	4.07977e-05	7	21374961	3.27486e-05	36	20608942	0.000174681	14	20367957	6.87354e-05	25
K02836 peptide chain release factor 2	0.0530558	0.00196308	0.0598235	0.00137613	5.81993e-06	0.00298695	-0.00676771	-0.00873257	-0.00480284	20328	38517452	0.0527761	15129	28642163	0.0528207	13341	26103837	0.0511074	13875	27161364	0.0510836	12180	22945505	0.0530823	11634	22183832	0.0524436	14056	26358245	0.0533268	16608	28730741	0.0578057	15218	26223346	0.0580323	16052	26962296	0.059535	12965	21374961	0.0606551	12605	20608942	0.0611628	12408	20367957	0.0609192	11096
K01265 methionyl aminopeptidase [EC:3.4.11.18]	0.0441615	0.00103397	0.0481106	0.000601545	2.39522e-06	0.00300493	-0.00394902	-0.00494144	-0.0029566	17264	38517452	0.0448212	12679	28642163	0.0442669	11075	26103837	0.0424267	11697	27161364	0.0430648	10334	22945505	0.0450371	9806	22183832	0.0442034	11499	26358245	0.0436258	13172	28730741	0.0458464	12501	26223346	0.0476713	13001	26962296	0.0482192	10566	21374961	0.0494317	9904	20608942	0.0480568	9752	20367957	0.0478791	8537
K07006 uncharacterized protein	0.00952449	0.00117996	0.00535393	0.000962032	5.3258e-06	0.00300668	0.00417056	0.00293168	0.00540944	3707	38517452	0.00962421	2539	28642163	0.00886455	2721	26103837	0.0104238	3239	27161364	0.011925	2261	22945505	0.00985378	1747	22183832	0.0078751	2423	26358245	0.00919257	2424	28730741	0.00843696	1403	26223346	0.00535019	1334	26962296	0.00494765	1012	21374961	0.00473451	909	20608942	0.00441071	1094	20367957	0.00537118	765
K01061 carboxymethylenebutenolidase [EC:3.1.1.45]	0.0288247	0.0035263	0.017144	0.0022718	8.82869e-06	0.00302075	0.0116806	0.00822484	0.0151365	10418	38517452	0.0270475	7863	28642163	0.0274525	9062	26103837	0.0347152	8798	27161364	0.0323916	7131	22945505	0.031078	6414	22183832	0.0289129	6854	26358245	0.0260032	6607	28730741	0.0229963	3841	26223346	0.0146473	4136	26962296	0.0153399	3130	21374961	0.0146433	3096	20608942	0.0150226	3874	20367957	0.0190201	3406
K03688 ubiquinone biosynthesis protein	0.0329386	0.00408625	0.0183086	0.00367949	6.23305e-06	0.00305989	0.01463	0.0101679	0.0190921	12941	38517452	0.0335978	8844	28642163	0.0308776	10443	26103837	0.0400056	10358	27161364	0.0381351	7720	22945505	0.0336449	6748	22183832	0.0304185	7870	26358245	0.0298578	7749	28730741	0.0269711	4341	26223346	0.016554	4553	26962296	0.0168865	3404	21374961	0.0159252	3291	20608942	0.0159688	3409	20367957	0.0167371	2736
K03749 DedD protein	0.00248033	0.000334621	0.00135349	0.000276603	9.27446e-06	0.00307994	0.00112685	0.000773736	0.00147996	968	38517452	0.00251315	677	28642163	0.00236365	770	26103837	0.00294976	755	27161364	0.00277968	648	22945505	0.00282408	524	22183832	0.00236208	563	26358245	0.00213595	550	28730741	0.00191433	345	26223346	0.00131562	297	26962296	0.00110154	258	21374961	0.00120702	284	20608942	0.00137804	199	20367957	0.000977025	230
K00320 5,10-methylenetetrahydromethanopterin reductase [EC:1.5.98.2]	0.0119167	0.00243471	0.00373809	0.00193646	8.74444e-06	0.00308542	0.0081786	0.00564471	0.0107125	4449	38517452	0.0115506	2971	28642163	0.0103728	4102	26103837	0.0157142	3727	27161364	0.0137217	2214	22945505	0.00964895	1975	22183832	0.00890288	3989	26358245	0.0151338	2956	28730741	0.0102886	844	26223346	0.00321851	893	26962296	0.00331203	341	21374961	0.00159532	410	20608942	0.00198943	561	20367957	0.00275433	652
K01923 phosphoribosylaminoimidazole-succinocarboxamide synthase [EC:6.3.2.6]	0.0408209	0.00155898	0.0459412	0.00108778	9.57476e-06	0.00308882	-0.00512026	-0.00667869	-0.00356184	15873	38517452	0.0412099	11661	28642163	0.0407127	10098	26103837	0.038684	10759	27161364	0.0396114	9167	22945505	0.0399512	9429	22183832	0.0425039	10559	26358245	0.0400596	12594	28730741	0.0438346	12179	26223346	0.0464433	12288	26962296	0.0455748	10362	21374961	0.0484773	9443	20608942	0.0458199	9239	20367957	0.0453605	8187
K15537 alkylglycerol monooxygenase [EC:1.14.16.5]	0.00175201	0.000364026	0.000429984	0.000362853	8.52604e-06	0.0031054	0.00132202	0.000905363	0.00173869	518	38517452	0.00134484	465	28642163	0.00162348	646	26103837	0.00247473	466	27161364	0.00171567	356	22945505	0.0015515	291	22183832	0.00131177	528	26358245	0.00200317	572	28730741	0.0019909	37	26223346	0.000141096	4	26962296	1.48355e-05	41	21374961	0.000191813	51	20608942	0.000247465	125	20367957	0.000613709	45
K14941 2-phospho-L-lactate guanylyltransferase [EC:2.7.7.68]	0.00417804	0.000507773	0.00225143	0.000330333	2.20126e-06	0.00310681	0.00192661	0.00142786	0.00242535	1657	38517452	0.00430195	1112	28642163	0.00388239	1167	26103837	0.00447061	1412	27161364	0.00519856	1033	22945505	0.00450197	802	22183832	0.00361525	994	26358245	0.00377112	1058	28730741	0.00368247	732	26223346	0.00279141	606	26962296	0.00224758	382	21374961	0.00178714	415	20608942	0.00201369	437	20367957	0.00214553	426
K01768 adenylate cyclase [EC:4.6.1.1]	0.421767	0.0394	0.267881	0.0310368	1.65816e-06	0.00312038	0.153886	0.113016	0.194755	155682	38517452	0.404186	113695	28642163	0.39695	122448	26103837	0.46908	127003	27161364	0.467587	100594	22945505	0.438404	98918	22183832	0.445901	107671	26358245	0.408491	98700	28730741	0.343534	65230	26223346	0.248748	67445	26962296	0.250146	49874	21374961	0.233329	46939	20608942	0.22776	58791	20367957	0.288645	49203
K02878 large subunit ribosomal protein L16	0.0268004	0.000975723	0.0300532	0.000621301	8.33208e-06	0.00313592	-0.00325279	-0.0042065	-0.00229909	10444	38517452	0.027115	7972	28642163	0.0278331	6576	26103837	0.0251917	7264	27161364	0.0267439	6177	22945505	0.0269203	5748	22183832	0.0259108	6915	26358245	0.0262347	8175	28730741	0.0284538	7979	26223346	0.0304271	8139	26962296	0.0301866	6659	21374961	0.0311533	6237	20608942	0.0302636	5906	20367957	0.0289965	5332
K11173 hydroxyacid-oxoacid transhydrogenase [EC:1.1.99.24]	0.00527856	0.000794242	0.00257787	0.000540821	6.68824e-06	0.00314654	0.00270069	0.00191182	0.00348957	2180	38517452	0.00565977	1640	28642163	0.00572582	1603	26103837	0.00614086	1643	27161364	0.00604903	1149	22945505	0.00500752	1183	22183832	0.00533271	1259	26358245	0.00477649	1016	28730741	0.00353628	504	26223346	0.00192195	590	26962296	0.00218824	412	21374961	0.00192749	485	20608942	0.00235335	718	20367957	0.00352514	552
K21305 dolichyl N-acetyl-alpha-D-glucosaminyl phosphate 3-beta-D-2,3-diacetamido-2,3-dideoxy-beta-D-glucuronosyltransferase [EC:2.4.1.335]	0.00372367	0.000689477	0.00603374	0.00042407	8.12309e-06	0.00316268	-0.00231007	-0.002979	-0.00164114	1032	38517452	0.0026793	790	28642163	0.00275817	889	26103837	0.00340563	1137	27161364	0.00418609	846	22945505	0.003687	895	22183832	0.00403447	1132	26358245	0.00429467	1363	28730741	0.00474405	1795	26223346	0.00684505	1705	26962296	0.00632365	1316	21374961	0.00615674	1278	20608942	0.00620119	1114	20367957	0.00546938	1082
K17315 glucose/mannose transport system substrate-binding protein	0.00646209	0.000833895	0.00981788	0.000972983	7.92207e-06	0.00319458	-0.00335579	-0.00439688	-0.00231471	2390	38517452	0.00620498	1551	28642163	0.00541509	1538	26103837	0.00589185	1466	27161364	0.00539737	1591	22945505	0.00693382	1573	22183832	0.00709075	2094	26358245	0.00794438	1959	28730741	0.00681848	2623	26223346	0.0100025	2587	26962296	0.00959488	2338	21374961	0.010938	1838	20608942	0.00891846	2244	20367957	0.0110173	1952
K03634 outer membrane lipoprotein carrier protein	0.00804723	0.000772383	0.00521876	0.000772266	7.91498e-06	0.00330993	0.00282846	0.00194304	0.00371389	2681	38517452	0.00696048	2262	28642163	0.00789745	2192	26103837	0.00839723	2243	27161364	0.00825805	2148	22945505	0.00936131	1939	22183832	0.0087406	2049	26358245	0.00777366	2008	28730741	0.00698903	1297	26223346	0.00494597	1189	26962296	0.00440986	998	21374961	0.00466901	1059	20608942	0.00513855	939	20367957	0.00461018	899
K01872 alanyl-tRNA synthetase [EC:6.1.1.7]	0.134549	0.00384127	0.147482	0.00255817	7.41722e-06	0.00334991	-0.0129329	-0.016727	-0.00913878	52516	38517452	0.136343	39735	28642163	0.138729	33828	26103837	0.12959	36145	27161364	0.133075	30288	22945505	0.132	28883	22183832	0.130198	35642	26358245	0.135221	40578	28730741	0.141235	38160	26223346	0.145519	39329	26962296	0.145867	32688	21374961	0.152927	30604	20608942	0.148499	29449	20367957	0.144585	26699
K03321 sulfate permease, SulP family	0.076154	0.0118951	0.0349864	0.0103068	7.89485e-06	0.00342849	0.0411677	0.0283844	0.053951	29881	38517452	0.0775778	21833	28642163	0.0762268	22675	26103837	0.0868646	22961	27161364	0.0845355	20342	22945505	0.0886535	18165	22183832	0.081884	15249	26358245	0.0578529	15985	28730741	0.0556373	6062	26223346	0.0231168	6031	26962296	0.0223683	5811	21374961	0.027186	5488	20608942	0.0266292	9167	20367957	0.045007	7803
K09022 2-iminobutanoate/2-iminopropanoate deaminase [EC:3.5.99.10]	0.0279186	0.000957602	0.0240435	0.00092665	2.16524e-06	0.00349254	0.00387502	0.00279467	0.00495536	10490	38517452	0.0272344	8021	28642163	0.0280042	7793	26103837	0.0298538	7571	27161364	0.0278742	6647	22945505	0.0289686	6062	22183832	0.0273262	7195	26358245	0.027297	7697	28730741	0.0267901	6144	26223346	0.0234295	6330	26962296	0.0234772	5027	21374961	0.0235182	4675	20608942	0.0226843	5013	20367957	0.0246122	4315
K22293 GntR family transcriptional regulator, rspAB operon transcriptional repressor	0.0114712	0.000819868	0.00845677	0.000882821	1.18331e-05	0.00351599	0.00301444	0.00203726	0.00399162	4059	38517452	0.0105381	3377	28642163	0.0117903	3217	26103837	0.0123239	3176	27161364	0.0116931	2433	22945505	0.0106034	2538	22183832	0.0114408	3392	26358245	0.0128688	3020	28730741	0.0105114	2272	26223346	0.00866404	2206	26962296	0.0081818	1511	21374961	0.00706902	1541	20608942	0.00747734	1810	20367957	0.00888651	1520
K03040 DNA-directed RNA polymerase subunit alpha [EC:2.7.7.6]	0.0615455	0.00272428	0.0716097	0.00294767	1.16028e-05	0.00354074	-0.0100643	-0.01332	-0.00680861	22797	38517452	0.0591862	17572	28642163	0.0613501	15256	26103837	0.0584435	15854	27161364	0.0583697	14188	22945505	0.0618335	13953	22183832	0.0628972	16703	26358245	0.0633692	19225	28730741	0.0669144	19169	26223346	0.073099	20230	26962296	0.0750307	16214	21374961	0.0758551	15088	20608942	0.0732109	13877	20367957	0.0681315	12822
K21498 antitoxin HigA-1	0.0286318	0.00331048	0.0178838	0.00195813	1.14043e-05	0.00357683	0.0107479	0.00756074	0.0139352	12316	38517452	0.0319751	8972	28642163	0.0313244	7661	26103837	0.0293482	8268	27161364	0.0304403	6871	22945505	0.0299449	6519	22183832	0.0293863	6628	26358245	0.0251458	6174	28730741	0.0214892	4187	26223346	0.0159667	4240	26962296	0.0157257	3321	21374961	0.0155369	3426	20608942	0.0166239	4106	20367957	0.0201591	3633
K17472 Rrf2 family transcriptional regulator, cysteine metabolism repressor	0.0134359	0.00107659	0.0169887	0.00091571	1.24387e-05	0.00360116	-0.00355277	-0.00470128	-0.00240426	5170	38517452	0.0134225	3903	28642163	0.0136268	3200	26103837	0.0122587	3497	27161364	0.0128749	2963	22945505	0.0129132	2882	22183832	0.0129914	3508	26358245	0.0133089	4623	28730741	0.0160908	4566	26223346	0.017412	4569	26962296	0.0169459	4026	21374961	0.0188351	3597	20608942	0.0174536	3174	20367957	0.0155833	2901
K07334 toxin HigB-1	0.0177691	0.0022226	0.0107122	0.00101066	1.98645e-05	0.00361758	0.0070569	0.00499429	0.00911951	7455	38517452	0.0193549	5903	28642163	0.0206095	4958	26103837	0.0189934	4625	27161364	0.0170279	4365	22945505	0.0190233	4027	22183832	0.0181529	4181	26358245	0.0158622	3772	28730741	0.0131288	2697	26223346	0.0102847	2553	26962296	0.00946878	2122	21374961	0.0099275	1993	20608942	0.00967056	2563	20367957	0.0125835	2067
K13888 membrane fusion protein, macrolide-specific efflux system	0.0126261	0.00168855	0.018603	0.00185499	2.02159e-05	0.00362315	-0.00597687	-0.00801201	-0.00394173	4998	38517452	0.0129759	4019	28642163	0.0140318	2982	26103837	0.0114236	2836	27161364	0.0104413	2706	22945505	0.0117932	2653	22183832	0.0119592	3199	26358245	0.0121366	4668	28730741	0.0162474	4642	26223346	0.0177018	4892	26962296	0.0181439	3627	21374961	0.0169685	3871	20608942	0.0187831	4292	20367957	0.0210723	3994
K02950 small subunit ribosomal protein S12	0.0246403	0.000973019	0.0277039	0.000819279	1.98066e-05	0.00366616	-0.00306356	-0.00409752	-0.0020296	9138	38517452	0.0237243	7427	28642163	0.0259303	6199	26103837	0.0237475	6435	27161364	0.0236917	5730	22945505	0.0249722	5340	22183832	0.0240716	6492	26358245	0.0246299	7572	28730741	0.026355	7033	26223346	0.0268196	7551	26962296	0.0280058	6114	21374961	0.0286036	5833	20608942	0.0283032	5385	20367957	0.0264386	4891
K09471 gamma-glutamylputrescine oxidase [EC:1.4.3.-]	0.013898	0.00229686	0.00676984	0.00180382	1.95196e-05	0.00367327	0.00712815	0.00474809	0.00950821	4696	38517452	0.0121919	3209	28642163	0.0112038	4153	26103837	0.0159095	4293	27161364	0.0158055	3883	22945505	0.0169227	3096	22183832	0.0139561	3961	26358245	0.0150276	2921	28730741	0.0101668	1600	26223346	0.00610143	1646	26962296	0.00610482	955	21374961	0.00446784	840	20608942	0.0040759	1621	20367957	0.00795858	1337
K13995 maleamate amidohydrolase [EC:3.5.1.107]	0.00288064	0.000330732	0.00126476	0.000412071	1.63402e-06	0.00368995	0.00161588	0.00118565	0.0020461	937	38517452	0.00243266	855	28642163	0.00298511	841	26103837	0.00322175	793	27161364	0.00291959	696	22945505	0.00303327	721	22183832	0.00325011	775	26358245	0.00294026	650	28730741	0.00226239	279	26223346	0.00106394	194	26962296	0.000719523	188	21374961	0.000879534	199	20608942	0.0009656	262	20367957	0.00128633	362
K09914 putative lipoprotein	0.00736289	0.00153236	0.00255541	0.00126513	1.94982e-05	0.00373143	0.00480749	0.00319118	0.00642379	2267	38517452	0.00588564	1597	28642163	0.0055757	2235	26103837	0.00856196	2352	27161364	0.00865936	2098	22945505	0.0091434	1739	22183832	0.00783904	2193	26358245	0.00831998	1413	28730741	0.00491808	298	26223346	0.00113639	428	26962296	0.0015874	242	21374961	0.00113217	305	20608942	0.00147994	836	20367957	0.00410449	596
K00939 adenylate kinase [EC:2.7.4.3]	0.040937	0.00136197	0.0482952	0.0023132	1.39088e-05	0.00373916	-0.00735821	-0.00958335	-0.00513307	15362	38517452	0.0398832	11920	28642163	0.041617	10524	26103837	0.0403159	11088	27161364	0.0408227	9142	22945505	0.0398422	8727	22183832	0.0393395	11035	26358245	0.0418655	12587	28730741	0.0438102	13017	26223346	0.049639	13358	26962296	0.0495433	10826	21374961	0.050648	10589	20608942	0.0513806	8922	20367957	0.0438041	8472
K19670 phosphonoacetate hydrolase [EC:3.11.1.2]	0.00189468	0.00046015	0.000445489	0.000245421	1.69911e-05	0.00376169	0.00144919	0.00101379	0.0018846	777	38517452	0.00201727	589	28642163	0.00205641	679	26103837	0.00260115	557	27161364	0.00205071	492	22945505	0.00214421	403	22183832	0.00181664	244	26358245	0.000925707	444	28730741	0.00154538	38	26223346	0.000144909	100	26962296	0.000370888	89	21374961	0.000416375	39	20608942	0.000189238	106	20367957	0.000520425	51
K01796 alpha-methylacyl-CoA racemase [EC:5.1.99.4]	0.0155103	0.00164058	0.0102534	0.000918346	1.36785e-05	0.00376693	0.00525687	0.00369271	0.00682103	6138	38517452	0.0159356	4547	28642163	0.0158752	4118	26103837	0.0157755	4765	27161364	0.0175433	3741	22945505	0.0163038	3523	22183832	0.0158809	4028	26358245	0.0152817	3300	28730741	0.011486	3006	26223346	0.0114631	2995	26962296	0.0111081	2196	21374961	0.0102737	1879	20608942	0.0091174	2136	20367957	0.0104871	2014
K19088 CRISPR-associated protein Cst1	0.000494327	0.000316763	0.00147493	0.00019524	1.74454e-05	0.003788	-0.0009806	-0.00128806	-0.000673141	22	38517452	5.7117e-05	46	28642163	0.000160602	59	26103837	0.00022602	81	27161364	0.000298218	194	22945505	0.000845482	179	22183832	0.000806894	192	26358245	0.000728425	239	28730741	0.000831862	328	26223346	0.00125079	398	26962296	0.00147614	359	21374961	0.00167954	313	20608942	0.00151876	300	20367957	0.0014729	332
K01783 ribulose-phosphate 3-epimerase [EC:5.1.3.1]	0.0388471	0.00106462	0.0421056	0.000695902	1.91524e-05	0.00379386	-0.00325848	-0.00430533	-0.00221163	14579	38517452	0.0378504	11153	28642163	0.0389391	10049	26103837	0.0384963	10550	27161364	0.0388419	8725	22945505	0.0380249	8339	22183832	0.0375904	10618	26358245	0.0402834	11708	28730741	0.0407508	10816	26223346	0.0412457	11513	26962296	0.0427004	9027	21374961	0.0422317	8855	20608942	0.0429668	8395	20367957	0.0412167	7461
K13891 glutathione transport system permease protein	0.00098032	0.000279846	0.00201558	0.000326723	1.94888e-05	0.00379393	-0.00103526	-0.00138477	-0.000685752	290	38517452	0.000752905	203	28642163	0.000708745	208	26103837	0.000796818	256	27161364	0.000942515	217	22945505	0.000945719	274	22183832	0.00123513	422	26358245	0.00160102	247	28730741	0.000859706	592	26223346	0.00225753	607	26962296	0.00225129	450	21374961	0.00210527	468	20608942	0.00227086	472	20367957	0.00231737	347
K04100 protocatechuate 4,5-dioxygenase, alpha chain [EC:1.13.11.8]	0.000291734	6.75497e-05	6.92364e-05	5.86417e-05	1.35152e-05	0.00381502	0.000222498	0.000149848	0.000295148	141	38517452	0.000366068	93	28642163	0.000324696	94	26103837	0.0003601	95	27161364	0.000349762	57	22945505	0.000248415	64	22183832	0.000288498	43	26358245	0.000163137	67	28730741	0.0002332	7	26223346	2.66938e-05	0	26962296	0	4	21374961	1.87135e-05	11	20608942	5.33749e-05	35	20367957	0.000171839	6
K01426 amidase [EC:3.5.1.4]	0.0551919	0.00616257	0.0358882	0.00525457	2.16677e-05	0.00382265	0.0193037	0.0127231	0.0258843	19770	38517452	0.0513274	13791	28642163	0.0481493	16833	26103837	0.0644848	17423	27161364	0.0641463	13309	22945505	0.0580026	12057	22183832	0.0543504	14171	26358245	0.0537631	13593	28730741	0.0473117	8338	26223346	0.0317961	8494	26962296	0.0315033	6663	21374961	0.031172	6141	20608942	0.0297977	8191	20367957	0.0402151	6550
K01634 sphinganine-1-phosphate aldolase [EC:4.1.2.27]	0.00981378	0.00176111	0.00427211	0.00096323	1.66098e-05	0.00382737	0.00554167	0.00386886	0.00721448	3779	38517452	0.00981114	2590	28642163	0.00904261	3186	26103837	0.0122051	3267	27161364	0.0120281	1973	22945505	0.00859863	1906	22183832	0.00859184	2982	26358245	0.0113133	1988	28730741	0.00691942	1147	26223346	0.00437397	1315	26962296	0.00487718	767	21374961	0.00358831	582	20608942	0.00282402	803	20367957	0.00394247	607
K02049 NitT/TauT family transport system ATP-binding protein	0.0382794	0.00327866	0.0283515	0.00234469	2.20535e-05	0.00383087	0.00992783	0.00662794	0.0132277	15785	38517452	0.0409814	11391	28642163	0.03977	11031	26103837	0.0422582	11485	27161364	0.0422843	8538	22945505	0.0372099	7926	22183832	0.0357287	9072	26358245	0.0344181	9649	28730741	0.0335842	7469	26223346	0.0284823	7439	26962296	0.0275904	5638	21374961	0.0263767	5461	20608942	0.0264982	5804	20367957	0.0284957	4586
K02874 large subunit ribosomal protein L14	0.0243575	0.00086773	0.0271283	0.000728961	1.69899e-05	0.00383665	-0.00277082	-0.00369209	-0.00184954	9523	38517452	0.0247239	7210	28642163	0.0251727	6166	26103837	0.023621	6244	27161364	0.0229885	5604	22945505	0.0244231	5525	22183832	0.0249055	6169	26358245	0.0234044	7361	28730741	0.0256206	7026	26223346	0.0267929	7650	26962296	0.028373	5880	21374961	0.0275088	5589	20608942	0.0271193	5515	20367957	0.0270768	4981
K01880 glycyl-tRNA synthetase [EC:6.1.1.14]	0.0405379	0.00377803	0.0523187	0.00267552	1.63199e-05	0.00383892	-0.0117808	-0.0155729	-0.00798874	15654	38517452	0.0406413	11674	28642163	0.0407581	9181	26103837	0.0351711	9722	27161364	0.0357935	9269	22945505	0.0403957	8738	22183832	0.039389	12084	26358245	0.0458452	13305	28730741	0.0463093	14043	26223346	0.0535515	14569	26962296	0.0540347	11779	21374961	0.0551065	11346	20608942	0.0550538	10772	20367957	0.052887	9330
K00655 1-acyl-sn-glycerol-3-phosphate acyltransferase [EC:2.3.1.51]	0.0765438	0.00417304	0.0637069	0.00245131	1.91039e-05	0.00385182	0.0128369	0.00882444	0.0168493	30202	38517452	0.0784112	21416	28642163	0.0747709	21310	26103837	0.0816355	22123	27161364	0.0814503	18250	22945505	0.0795363	16750	22183832	0.0755054	18642	26358245	0.0707255	20202	28730741	0.0703149	16355	26223346	0.0623681	16801	26962296	0.0623129	13314	21374961	0.0622878	12872	20608942	0.0624583	12814	20367957	0.0629125	11112
K01937 CTP synthase [EC:6.3.4.2]	0.0819246	0.00269537	0.0908913	0.00250976	1.58172e-05	0.00388243	-0.00896678	-0.0119538	-0.00597979	31316	38517452	0.0813034	24048	28642163	0.0839601	20526	26103837	0.0786321	21420	27161364	0.078862	18620	22945505	0.0811488	17998	22183832	0.0811312	21835	26358245	0.0828394	25145	28730741	0.0875195	24079	26223346	0.0918228	24171	26962296	0.0896474	20522	21374961	0.0960095	18961	20608942	0.0920038	17843	20367957	0.0876033	16621
K01478 arginine deiminase [EC:3.5.3.6]	0.0078424	0.00123525	0.00275121	0.00161913	1.62397e-05	0.00390133	0.00509119	0.0034294	0.00675298	2801	38517452	0.00727203	1876	28642163	0.00654978	2430	26103837	0.00930898	2414	27161364	0.00888762	2234	22945505	0.00973611	1706	22183832	0.00769029	1884	26358245	0.00714767	1766	28730741	0.00614673	411	26223346	0.00156731	336	26962296	0.00124618	246	21374961	0.00115088	168	20608942	0.00081518	780	20367957	0.00382954	659
K03684 ribonuclease D [EC:3.1.13.5]	0.0211692	0.00174985	0.0159003	0.00106432	2.28393e-05	0.00390725	0.005269	0.00357513	0.00696286	8263	38517452	0.0214526	6336	28642163	0.0221212	6296	26103837	0.0241191	5880	27161364	0.0216484	5082	22945505	0.0221481	4438	22183832	0.0200056	5268	26358245	0.0199862	5135	28730741	0.0178728	3925	26223346	0.0149676	4151	26962296	0.0153956	3017	21374961	0.0141146	3292	20608942	0.0159736	3474	20367957	0.0170562	2794
K06192 paraquat-inducible protein B	0.00917491	0.00114206	0.00335622	0.00189475	1.90659e-05	0.00391406	0.00581869	0.00398786	0.00764953	3052	38517452	0.00792368	2469	28642163	0.00862016	2821	26103837	0.0108068	2892	27161364	0.0106475	2322	22945505	0.0101196	2060	22183832	0.00928604	2151	26358245	0.00816063	2251	28730741	0.00783481	354	26223346	0.00134994	264	26962296	0.000979145	357	21374961	0.00167018	406	20608942	0.00197002	1132	20367957	0.00555775	872
K02535 UDP-3-O-[3-hydroxymyristoyl] N-acetylglucosamine deacetylase [EC:3.5.1.108]	0.0187217	0.00118692	0.0143111	0.00142816	2.3339e-05	0.00393314	0.00441065	0.00290053	0.00592077	6937	38517452	0.01801	5388	28642163	0.0188114	5354	26103837	0.0205104	5321	27161364	0.0195903	4220	22945505	0.0183914	4110	22183832	0.018527	4298	26358245	0.0163061	5639	28730741	0.0196271	3655	26223346	0.013938	3520	26962296	0.0130553	2777	21374961	0.0129918	2890	20608942	0.014023	2862	20367957	0.0140515	2394
K07726 putative transcriptional regulator	0.0075587	0.000999388	0.00438166	0.000467337	1.88365e-05	0.00393858	0.00317704	0.00224693	0.00410716	2954	38517452	0.00766925	2232	28642163	0.00779271	2212	26103837	0.00847385	2331	27161364	0.00858204	1812	22945505	0.00789697	1587	22183832	0.00715386	2039	26358245	0.00773572	1484	28730741	0.0051652	1032	26223346	0.00393542	1111	26962296	0.00412057	935	21374961	0.00437428	948	20608942	0.00459995	1071	20367957	0.00525826	820
K02959 small subunit ribosomal protein S16	0.020133	0.000491579	0.0224783	0.000784744	2.42415e-05	0.00396682	-0.0023453	-0.0031096	-0.001581	7745	38517452	0.0201078	6011	28642163	0.0209865	5205	26103837	0.0199396	5449	27161364	0.0200616	4463	22945505	0.0194504	4379	22183832	0.0197396	5255	26358245	0.0199368	5988	28730741	0.0208418	5971	26223346	0.0227698	6029	26962296	0.0223609	4863	21374961	0.0227509	4877	20608942	0.0236645	4367	20367957	0.0214405	4236
K06976 uncharacterized protein	0.00485217	0.000844319	0.00210562	0.000389167	1.58101e-05	0.00396694	0.00274654	0.00196193	0.00353116	1470	38517452	0.00381645	1261	28642163	0.0044026	1622	26103837	0.00621365	1504	27161364	0.00553728	1299	22945505	0.00566124	1015	22183832	0.0045754	1299	26358245	0.00492825	1058	28730741	0.00368247	678	26223346	0.00258548	578	26962296	0.00214373	307	21374961	0.00143626	326	20608942	0.00158184	408	20367957	0.00200315	440
K05555 cyclase [EC:4.-.-.-]	0.0226876	0.00213206	0.0156427	0.00213494	2.40389e-05	0.00399152	0.00704487	0.00459895	0.00949079	9327	38517452	0.024215	6377	28642163	0.0222644	6554	26103837	0.0251074	6334	27161364	0.0233199	4741	22945505	0.020662	4692	22183832	0.0211505	6755	26358245	0.0256277	5503	28730741	0.0191537	3872	26223346	0.0147655	3940	26962296	0.014613	2605	21374961	0.0121872	2943	20608942	0.0142802	2985	20367957	0.0146554	3313
K02065 phospholipid/cholesterol/gamma-HCH transport system ATP-binding protein	0.0420655	0.00228162	0.0349363	0.00182266	1.88328e-05	0.0040121	0.00712917	0.00475098	0.00950737	15741	38517452	0.0408672	12081	28642163	0.0421791	12002	26103837	0.0459779	12117	27161364	0.0446112	9066	22945505	0.039511	9220	22183832	0.0415618	10225	26358245	0.0387924	12361	28730741	0.0430236	8798	26223346	0.0335503	9087	26962296	0.0337026	7043	21374961	0.0329498	7300	20608942	0.0354215	7087	20367957	0.0347948	6039
K01026 propionate CoA-transferase [EC:2.8.3.1]	0.0180599	0.00315506	0.00836617	0.00263911	2.50456e-05	0.00403986	0.00969369	0.00634942	0.0130379	6033	38517452	0.015663	4459	28642163	0.015568	5531	26103837	0.0211885	5666	27161364	0.0208605	5053	22945505	0.0220217	4375	22183832	0.0197216	4453	26358245	0.0168941	3609	28730741	0.0125615	1534	26223346	0.00584975	1689	26962296	0.0062643	1154	21374961	0.00539884	1169	20608942	0.0056723	2441	20367957	0.0119845	1772
K22347 4,4'-dithiodibutanoate disulfide reductase [EC:1.8.1.20]	0.00338723	0.000470901	0.00169372	0.000511047	1.57783e-05	0.00404894	0.00169351	0.00112982	0.0022572	1250	38517452	0.00324528	828	28642163	0.00289084	845	26103837	0.00323707	912	27161364	0.00335771	1050	22945505	0.00457606	725	22183832	0.00326815	889	26358245	0.00337276	905	28730741	0.00314994	320	26223346	0.00122029	371	26962296	0.001376	291	21374961	0.00136141	248	20608942	0.00120336	391	20367957	0.00191968	274
K15738 ABC transport system ATP-binding/permease protein	0.0192783	0.00308138	0.0101614	0.00198032	2.65651e-05	0.00405334	0.00911693	0.00609882	0.012135	7650	38517452	0.0198611	6155	28642163	0.0214893	5801	26103837	0.0222228	5556	27161364	0.0204555	5159	22945505	0.0224837	4258	22183832	0.0191942	3788	26358245	0.0143712	4065	28730741	0.0141486	2225	26223346	0.00848481	2066	26962296	0.00766255	1923	21374961	0.00899651	1755	20608942	0.00851572	2764	20367957	0.0135703	2256
K17228 dimethylsulfone monooxygenase [EC:1.14.14.35]	0.00376722	0.000739426	0.00153599	0.000583706	2.62548e-05	0.00406087	0.00223123	0.00146367	0.00299879	1295	38517452	0.00336211	767	28642163	0.00267787	1338	26103837	0.00512568	877	27161364	0.00322885	749	22945505	0.00326426	852	22183832	0.00384063	1165	26358245	0.00441987	1212	28730741	0.00421848	327	26223346	0.00124698	237	26962296	0.000879005	224	21374961	0.00104796	188	20608942	0.000912225	378	20367957	0.00185586	285
K19191 4-methylaminobutanoate oxidase (formaldehyde-forming) [EC:1.5.3.19]	0.0227359	0.00339929	0.0126081	0.00243537	2.59381e-05	0.00406759	0.0101278	0.00670472	0.0135508	10886	38517452	0.0282625	7210	28642163	0.0251727	6250	26103837	0.0239428	6489	27161364	0.0238906	5498	22945505	0.0239611	4653	22183832	0.0209747	4853	26358245	0.0184117	4962	28730741	0.0172707	2706	26223346	0.010319	2809	26962296	0.0104183	2228	21374961	0.0104234	2073	20608942	0.0100587	3006	20367957	0.0147585	2394
K17325 glycerol transport system ATP-binding protein	0.000718873	0.000158515	0.000248561	0.000103441	2.58662e-05	0.00411345	0.000470312	0.000314504	0.000626121	238	38517452	0.000617902	237	28642163	0.000827451	233	26103837	0.000892589	185	27161364	0.000681115	163	22945505	0.000710379	202	22183832	0.000910573	191	26358245	0.000724631	111	28730741	0.000386346	32	26223346	0.000122029	36	26962296	0.00013352	43	21374961	0.00020117	31	20608942	0.00015042	85	20367957	0.000417322	59
K00356 NADH dehydrogenase [EC:1.6.99.3]	0.0095634	0.000975989	0.00637009	0.000866976	1.56911e-05	0.00412019	0.00319331	0.00213366	0.00425296	3768	38517452	0.00978258	2492	28642163	0.00870046	2870	26103837	0.0109946	2986	27161364	0.0109936	2032	22945505	0.00885576	1867	22183832	0.00841604	2301	26358245	0.00872972	2883	28730741	0.0100345	1748	26223346	0.00666582	1825	26962296	0.00676871	1230	21374961	0.0057544	1146	20608942	0.00556069	1082	20367957	0.00531227	1022
K18682 ribonucrease Y [EC:3.1.-.-]	0.0654496	0.00433524	0.0782704	0.00249834	2.79034e-05	0.00420077	-0.0128208	-0.0169748	-0.00866686	25624	38517452	0.0665257	20252	28642163	0.070707	15708	26103837	0.0601751	16543	27161364	0.0609064	14011	22945505	0.0610621	14314	22183832	0.0645245	17706	26358245	0.0671744	20836	28730741	0.0725216	20554	26223346	0.0783805	21357	26962296	0.0792106	17068	21374961	0.0798504	16767	20608942	0.0813579	15979	20367957	0.0784517	14512
K15983 3-ketosteroid 9alpha-monooxygenase subunit B [EC:1.14.15.30]	0.00226584	0.000421919	0.000527238	0.000395252	1.50072e-06	0.00423615	0.0017386	0.00126975	0.00220746	787	38517452	0.00204323	551	28642163	0.00192374	624	26103837	0.00239045	673	27161364	0.00247778	630	22945505	0.00274564	483	22183832	0.00217726	757	26358245	0.00287197	430	28730741	0.00149665	41	26223346	0.000156349	35	26962296	0.000129811	48	21374961	0.000224562	28	20608942	0.000135863	177	20367957	0.000869012	116
K03395 aminoglycoside 3-N-acetyltransferase I [EC:2.3.1.60]	0.000516248	0.000118622	0.000160218	9.62332e-05	2.94233e-05	0.00425921	0.00035603	0.000231708	0.000480351	207	38517452	0.000537419	150	28642163	0.000523703	184	26103837	0.000704877	181	27161364	0.000666388	112	22945505	0.000488113	96	22183832	0.000432748	124	26358245	0.000470441	88	28730741	0.000306292	20	26223346	7.62679e-05	4	26962296	1.48355e-05	45	21374961	0.000210527	6	20608942	2.91136e-05	47	20367957	0.000230755	37
K03150 2-iminoacetate synthase [EC:4.1.99.19]	0.00727366	0.000850173	0.0100328	0.000869687	3.24875e-05	0.00426531	-0.00275917	-0.00374513	-0.0017732	2799	38517452	0.00726684	2103	28642163	0.00734232	2079	26103837	0.00796435	2071	27161364	0.0076248	1530	22945505	0.00666797	1338	22183832	0.00603142	1693	26358245	0.00642304	2548	28730741	0.00886855	2684	26223346	0.0102352	3054	26962296	0.0113269	2337	21374961	0.0109334	2139	20608942	0.010379	2097	20367957	0.0102956	1694
K02994 small subunit ribosomal protein S8	0.025154	0.000717511	0.0275135	0.000737978	2.92164e-05	0.00428419	-0.00235947	-0.00319393	-0.00152501	9777	38517452	0.0253833	7378	28642163	0.0257592	6303	26103837	0.0241459	6716	27161364	0.0247263	5711	22945505	0.0248894	5636	22183832	0.0254059	6436	26358245	0.0244174	7615	28730741	0.0265047	7269	26223346	0.0277196	7272	26962296	0.026971	6045	21374961	0.0282808	5801	20608942	0.028148	5298	20367957	0.0260114	5081
K08906 cytochrome c6	0.000991351	0.000241392	0.000279621	0.000181082	3.03588e-05	0.00428477	0.00071173	0.000465295	0.000958164	524	38517452	0.00136042	191	28642163	0.000666849	334	26103837	0.00127951	286	27161364	0.00105297	263	22945505	0.00114619	174	22183832	0.000784355	237	26358245	0.000899149	213	28730741	0.000741366	12	26223346	4.57608e-05	4	26962296	1.48355e-05	85	21374961	0.000397662	18	20608942	8.73407e-05	97	20367957	0.000476238	73
K01640 hydroxymethylglutaryl-CoA lyase [EC:4.1.3.4]	0.011429	0.00165573	0.00595052	0.0017521	3.22771e-05	0.00428753	0.00547845	0.00352365	0.00743324	3842	38517452	0.0099747	3093	28642163	0.0107988	3134	26103837	0.0120059	3282	27161364	0.0120833	3241	22945505	0.0141248	2886	22183832	0.0130095	2886	26358245	0.0109491	2438	28730741	0.00848568	1096	26223346	0.00417948	1025	26962296	0.00380161	917	21374961	0.00429007	966	20608942	0.00468729	1703	20367957	0.00836117	1337
K06900 uncharacterized protein	0.00403837	0.000802866	0.00164858	0.00037131	3.34583e-05	0.00429293	0.0023898	0.00164345	0.00313615	1934	38517452	0.0050211	1236	28642163	0.00431532	997	26103837	0.00381936	883	27161364	0.00325094	1064	22945505	0.00463707	784	22183832	0.00353411	1329	26358245	0.00504207	772	28730741	0.00268702	336	26223346	0.0012813	358	26962296	0.00132778	337	21374961	0.00157661	238	20608942	0.00115484	458	20367957	0.00224863	289
K22479 N-acetyltransferase	0.00230638	0.000572795	0.000633265	0.000376244	3.00679e-05	0.00429742	0.00167312	0.00110923	0.002237	1024	38517452	0.00265854	549	28642163	0.00191675	690	26103837	0.00264329	952	27161364	0.00350498	497	22945505	0.002166	410	22183832	0.00184819	565	26358245	0.00214354	451	28730741	0.00156975	180	26223346	0.000686411	119	26962296	0.000441357	47	21374961	0.000219883	54	20608942	0.000262022	82	20367957	0.000402593	106
K15862 cytochrome c oxidase cbb3-type subunit I/II [EC:1.9.3.1]	0.00128836	0.000325163	0.000297394	0.000138231	3.08389e-05	0.0042988	0.000990971	0.000691052	0.00129089	482	38517452	0.00125138	396	28642163	0.00138258	498	26103837	0.00190777	417	27161364	0.00153527	191	22945505	0.000832407	287	22183832	0.00129374	327	26358245	0.0012406	248	28730741	0.000863187	91	26223346	0.000347019	109	26962296	0.000404268	38	21374961	0.000177778	41	20608942	0.000198943	40	20367957	0.000196387	19
K09763 uncharacterized protein	0.00138185	0.00015017	0.000759523	0.000211431	2.90153e-05	0.00431068	0.000622323	0.000409934	0.000834713	577	38517452	0.00149802	377	28642163	0.00131624	407	26103837	0.00155916	426	27161364	0.0015684	311	22945505	0.00135539	260	22183832	0.00117202	376	26358245	0.0014265	333	28730741	0.00115904	165	26223346	0.00062921	218	26962296	0.000808536	136	21374961	0.000636258	87	20608942	0.000422147	200	20367957	0.000981935	106
K15866 2-(1,2-epoxy-1,2-dihydrophenyl)acetyl-CoA isomerase [EC:5.3.3.18]	0.0494614	0.00421859	0.0369689	0.00334873	3.2107e-05	0.00431572	0.0124926	0.00810511	0.0168801	16953	38517452	0.0440138	12351	28642163	0.0431217	12617	26103837	0.0483339	14065	27161364	0.0517831	12197	22945505	0.0531564	12000	22183832	0.0540934	14325	26358245	0.0543473	13458	28730741	0.0468418	9416	26223346	0.0359069	9390	26962296	0.0348264	6828	21374961	0.0319439	6749	20608942	0.0327479	8147	20367957	0.0399991	7048
K07795 putative tricarboxylic transport membrane protein	0.0628329	0.00547595	0.0469681	0.00379868	3.32612e-05	0.00431669	0.0158647	0.0103993	0.0213302	25184	38517452	0.0653833	20214	28642163	0.0705743	14674	26103837	0.056214	14914	27161364	0.0549089	14475	22945505	0.0630843	15214	22183832	0.0685815	17389	26358245	0.0659718	16648	28730741	0.0579449	11341	26223346	0.0432477	11693	26962296	0.043368	9834	21374961	0.0460071	9979	20608942	0.0484207	9347	20367957	0.0458907	7808
K06859 glucose-6-phosphate isomerase, archaeal [EC:5.3.1.9]	0.00389011	0.000669852	0.00583801	0.000439022	3.13668e-05	0.00431906	-0.0019479	-0.00260698	-0.00128881	1624	38517452	0.00421627	1235	28642163	0.00431183	804	26103837	0.00308001	809	27161364	0.0029785	847	22945505	0.00369135	804	22183832	0.00362426	1062	26358245	0.0040291	1491	28730741	0.00518956	1456	26223346	0.0055523	1590	26962296	0.00589712	1430	21374961	0.00669007	1108	20608942	0.00537631	1111	20367957	0.00545465	1042
K06200 carbon starvation protein	0.0443327	0.00303894	0.0531539	0.00193076	3.18684e-05	0.00433526	-0.00882118	-0.0117901	-0.00585229	16007	38517452	0.0415578	11769	28642163	0.0410898	12581	26103837	0.048196	12574	27161364	0.0462937	9612	22945505	0.0418906	9078	22183832	0.0409217	12670	26358245	0.0480685	13401	28730741	0.0466434	14547	26223346	0.0554735	14951	26962296	0.0554515	11863	21374961	0.0554995	10973	20608942	0.0532439	10641	20367957	0.0522438	9253
K03599 stringent starvation protein A	0.0018662	0.000519143	0.000281119	0.000196102	3.56993e-05	0.00447867	0.00158508	0.00111025	0.00205991	502	38517452	0.00130331	415	28642163	0.00144891	748	26103837	0.00286548	545	27161364	0.00200653	516	22945505	0.00224881	462	22183832	0.0020826	316	26358245	0.00119887	510	28730741	0.0017751	49	26223346	0.000186856	13	26962296	4.82155e-05	56	21374961	0.000261989	0	20608942	0	105	20367957	0.000515516	44
K03086 RNA polymerase primary sigma factor	0.187208	0.00864829	0.212184	0.00627229	3.56916e-05	0.00452802	-0.0249753	-0.0337149	-0.0162357	71892	38517452	0.186648	56327	28642163	0.196658	46815	26103837	0.179341	49062	27161364	0.180632	41027	22945505	0.178802	40934	22183832	0.184522	48989	26358245	0.185858	58957	28730741	0.205205	56161	26223346	0.214164	56689	26962296	0.210253	47004	21374961	0.219902	46087	20608942	0.223626	42695	20367957	0.209618	37706
K00344 NADPH2	0.0601089	0.00863834	0.034706	0.00717158	3.832e-05	0.00460288	0.0254029	0.0162725	0.0345333	23222	38517452	0.0602896	16661	28642163	0.0581695	20088	26103837	0.0769542	19137	27161364	0.0704567	13518	22945505	0.0589135	11199	22183832	0.0504827	14144	26358245	0.0536606	14924	28730741	0.0519444	8707	26223346	0.0332032	8856	26962296	0.0328459	5846	21374961	0.0273498	6208	20608942	0.0301228	6494	20367957	0.0318834	5253
K08322 L-gulonate 5-dehydrogenase [EC:1.1.1.380]	0.0033793	0.000483313	0.00519407	0.000626655	3.79393e-05	0.00460615	-0.00181478	-0.00246022	-0.00116933	1103	38517452	0.00286364	888	28642163	0.00310032	773	26103837	0.00296125	754	27161364	0.002776	824	22945505	0.00359112	919	22183832	0.00414266	1015	26358245	0.00385079	1077	28730741	0.0037486	1283	26223346	0.00489259	1398	26962296	0.00518502	1404	21374961	0.00656843	1172	20608942	0.00568685	1054	20367957	0.00517479	850
K03775 FKBP-type peptidyl-prolyl cis-trans isomerase SlyD [EC:5.2.1.8]	0.00292978	0.000697148	0.000923516	0.000381643	3.71492e-05	0.00460936	0.00200626	0.00134398	0.00266855	1233	38517452	0.00320115	764	28642163	0.0026674	1060	26103837	0.00406071	1014	27161364	0.00373324	722	22945505	0.00314659	562	22183832	0.00253338	586	26358245	0.00222321	538	28730741	0.00187256	140	26223346	0.000533875	173	26962296	0.000641637	119	21374961	0.000556726	100	20608942	0.000485226	227	20367957	0.0011145	256
K00245 fumarate reductase iron-sulfur subunit [EC:1.3.5.4]	0.00296791	0.000725204	0.000896364	0.000494146	3.7706e-05	0.00462759	0.00207155	0.00135112	0.00279198	1027	38517452	0.00266632	673	28642163	0.00234968	1091	26103837	0.00417946	1099	27161364	0.00404619	755	22945505	0.0032904	551	22183832	0.00248379	658	26358245	0.00249637	641	28730741	0.00223106	129	26223346	0.000491928	167	26962296	0.000619383	80	21374961	0.00037427	69	20608942	0.000334806	300	20367957	0.0014729	168
K09936 bacterial/archaeal transporter family-2 protein	0.00174123	0.000423179	0.000538927	0.000268963	3.8979e-05	0.00463276	0.0012023	0.000788843	0.00161576	515	38517452	0.00133706	415	28642163	0.00144891	572	26103837	0.00219125	585	27161364	0.00215379	471	22945505	0.00205269	405	22183832	0.00182565	523	26358245	0.0019842	269	28730741	0.000936279	111	26223346	0.000423287	62	26962296	0.000229951	85	21374961	0.000397662	46	20608942	0.000223204	137	20367957	0.000672625	135
K00496 alkane 1-monooxygenase [EC:1.14.15.3]	0.00259418	0.000664583	0.000700501	0.000365971	4.03754e-05	0.00474873	0.00189368	0.00126174	0.00252562	765	38517452	0.00198611	418	28642163	0.00145939	755	26103837	0.0028923	850	27161364	0.00312945	806	22945505	0.00351267	622	22183832	0.00280384	798	26358245	0.00302752	558	28730741	0.00194217	123	26223346	0.000469048	133	26962296	0.000493281	53	21374961	0.000247954	89	20608942	0.000431851	181	20367957	0.000888651	112
K06196 cytochrome c-type biogenesis protein	0.0444959	0.00186689	0.0525364	0.00284818	4.15407e-05	0.00483542	-0.00804052	-0.010843	-0.00523804	17526	38517452	0.0455015	13443	28642163	0.0469343	10629	26103837	0.0407182	11607	27161364	0.0427335	10160	22945505	0.0442788	9861	22183832	0.0444513	11881	26358245	0.0450751	13295	28730741	0.0462745	14075	26223346	0.0536735	14501	26962296	0.0537825	11852	21374961	0.0554481	11854	20608942	0.0575187	10115	20367957	0.0496613	9254
K02933 large subunit ribosomal protein L6	0.0316022	0.00113114	0.0348222	0.00059658	4.22427e-05	0.00486696	-0.00322003	-0.0042886	-0.00215145	12186	38517452	0.0316376	9385	28642163	0.0327664	8107	26103837	0.0310567	8295	27161364	0.0305397	7129	22945505	0.0310693	6863	22183832	0.0309369	8107	26358245	0.030757	9784	28730741	0.0340541	9065	26223346	0.0345684	9471	26962296	0.0351268	7577	21374961	0.035448	7189	20608942	0.0348829	7194	20367957	0.0353202	6221
K01130 arylsulfatase [EC:3.1.6.1]	0.233823	0.036367	0.122286	0.0350396	4.2908e-05	0.00489368	0.111538	0.0705937	0.152482	87538	38517452	0.227268	64218	28642163	0.224208	75977	26103837	0.291057	76262	27161364	0.280774	56452	22945505	0.246026	50946	22183832	0.229654	51516	26358245	0.195445	50610	28730741	0.176153	24200	26223346	0.0922842	23202	26962296	0.0860535	17114	21374961	0.0800656	18981	20608942	0.0921008	33634	20367957	0.165132	28500
K15533 1,3-beta-galactosyl-N-acetylhexosamine phosphorylase [EC:2.4.1.211]	0.000282612	0.000314506	0.0013319	0.000365408	5.39601e-05	0.00495337	-0.00104929	-0.00144093	-0.000657644	78	38517452	0.000202506	55	28642163	0.000192025	69	26103837	0.000264329	36	27161364	0.000132541	18	22945505	7.84467e-05	31	22183832	0.000139741	39	26358245	0.000147961	317	28730741	0.00110335	409	26223346	0.00155968	414	26962296	0.00153548	420	21374961	0.00196492	313	20608942	0.00151876	179	20367957	0.000878831	146
K07457 endonuclease III related protein	0.0161034	0.00187604	0.0213096	0.00138296	5.36145e-05	0.00496198	-0.0052062	-0.00711121	-0.00330119	5871	38517452	0.0152424	4323	28642163	0.0150931	3468	26103837	0.0132854	4147	27161364	0.015268	3485	22945505	0.0151882	3730	22183832	0.016814	5003	26358245	0.0189808	5446	28730741	0.0189553	5887	26223346	0.0224495	6115	26962296	0.0226798	4830	21374961	0.0225965	4716	20608942	0.0228833	4192	20367957	0.0205813	3605
K14415 tRNA-splicing ligase RtcB (3'-phosphate/5'-hydroxy nucleic acid ligase) [EC:6.5.1.8]	0.0756329	0.00412248	0.0902565	0.00515973	5.03917e-05	0.00499099	-0.0146235	-0.020002	-0.00924511	28903	38517452	0.0750387	22310	28642163	0.0778922	18178	26103837	0.0696373	19163	27161364	0.0705524	16812	22945505	0.0732693	17153	22183832	0.0773221	20692	26358245	0.078503	23803	28730741	0.0828485	23031	26223346	0.0878263	23567	26962296	0.0874072	20425	21374961	0.0955557	19995	20608942	0.097021	19164	20367957	0.094089	16885
K02906 large subunit ribosomal protein L3	0.0368863	0.00135977	0.0407398	0.000597064	5.35107e-05	0.0049933	-0.00385346	-0.00511118	-0.00259573	14415	38517452	0.0374246	10835	28642163	0.0378288	9528	26103837	0.0365004	9387	27161364	0.0345601	8341	22945505	0.0363513	7847	22183832	0.0353726	10097	26358245	0.0383068	11132	28730741	0.038746	10511	26223346	0.0400826	11006	26962296	0.04082	8852	21374961	0.0414129	8608	20608942	0.0417683	8290	20367957	0.0407012	7205
K06986 uncharacterized protein	0.000400785	0.000116314	7.59912e-05	8.18384e-05	4.79378e-05	0.00501172	0.000324794	0.000208257	0.000441331	146	38517452	0.000379049	80	28642163	0.000279309	100	26103837	0.000383085	121	27161364	0.000445486	145	22945505	0.000631932	69	22183832	0.000311037	134	26358245	0.00050838	77	28730741	0.000268006	0	26223346	0	3	26962296	1.11266e-05	0	21374961	0	0	20608942	0	33	20367957	0.000162019	13
K01820 L-rhamnose isomerase / sugar isomerase [EC:5.3.1.14 5.3.1.-]	0.00463388	0.00135886	0.00877627	0.00135285	5.33654e-05	0.00502124	-0.00414239	-0.0056968	-0.00258798	1185	38517452	0.00307653	780	28642163	0.00272326	1032	26103837	0.00395344	1220	27161364	0.00449167	1097	22945505	0.00478089	1094	22183832	0.00493152	1885	26358245	0.00715146	1713	28730741	0.00596225	2718	26223346	0.0103648	2568	26962296	0.00952441	2416	21374961	0.0113029	1622	20608942	0.00787037	1699	20367957	0.00834153	1396
K01086 fructose-1,6-bisphosphatase I / sedoheptulose-1,7-bisphosphatase [EC:3.1.3.11 3.1.3.37]	0.00134287	0.000389009	0.000265394	0.000263266	5.0352e-05	0.00503119	0.00107747	0.000691697	0.00146325	451	38517452	0.0011709	303	28642163	0.00105788	421	26103837	0.00161279	408	27161364	0.00150213	455	22945505	0.00198296	371	22183832	0.00167239	267	26358245	0.00101297	210	28730741	0.000730924	2	26223346	7.62679e-06	0	26962296	0	8	21374961	3.7427e-05	5	20608942	2.42613e-05	80	20367957	0.000392774	71
K00658 2-oxoglutarate dehydrogenase E2 component (dihydrolipoamide succinyltransferase) [EC:2.3.1.61]	0.0172847	0.00180849	0.0120068	0.00162516	5.31363e-05	0.0050417	0.00527787	0.00330473	0.007251	6527	38517452	0.0169456	4632	28642163	0.016172	5309	26103837	0.020338	5472	27161364	0.0201463	3981	22945505	0.0173498	3611	22183832	0.0162776	4038	26358245	0.0153197	4519	28730741	0.0157288	3243	26223346	0.0123668	2941	26962296	0.0109078	2482	21374961	0.0116117	2439	20608942	0.0118347	2047	20367957	0.0100501	1871
K04337 curli production assembly/transport component CsgE	0.000241722	0.00021957	0.000877275	0.000189249	5.00607e-05	0.00504675	-0.000635553	-0.00087102	-0.000400086	19	38517452	4.93283e-05	0	28642163	0	117	26103837	0.00044821	52	27161364	0.000191448	23	22945505	0.000100237	103	22183832	0.000464302	16	26358245	6.07021e-05	178	28730741	0.000619545	273	26223346	0.00104106	264	26962296	0.000979145	198	21374961	0.000926317	235	20608942	0.00114028	175	20367957	0.000859193	87
K00991 2-C-methyl-D-erythritol 4-phosphate cytidylyltransferase [EC:2.7.7.60]	0.027752	0.00211925	0.0336505	0.00141934	4.78419e-05	0.00504844	-0.00589848	-0.00799464	-0.00380233	10374	38517452	0.0269332	7474	28642163	0.0260944	6448	26103837	0.0247013	6929	27161364	0.0255105	6565	22945505	0.0286113	6455	22183832	0.0290978	8122	26358245	0.0308139	8692	28730741	0.0302533	8867	26223346	0.0338134	8999	26962296	0.0333762	7629	21374961	0.0356913	7197	20608942	0.0349217	6871	20367957	0.0337344	6253
K06998 trans-2,3-dihydro-3-hydroxyanthranilate isomerase [EC:5.3.3.17]	0.0172713	0.00208193	0.011415	0.00104974	4.88862e-05	0.00506399	0.00585631	0.00390152	0.00781109	6682	38517452	0.017348	4988	28642163	0.0174149	5285	26103837	0.0202461	5441	27161364	0.0200321	4077	22945505	0.0177682	3556	22183832	0.0160297	4178	26358245	0.0158508	3873	28730741	0.0134803	2808	26223346	0.010708	2958	26962296	0.0109709	2093	21374961	0.00979183	2153	20608942	0.0104469	2582	20367957	0.0126768	2288
K12536 ATP-binding cassette, subfamily C, bacterial exporter for protease/lipase	0.000832025	0.000174712	0.000215658	0.000216519	4.93437e-05	0.0050649	0.000616367	0.000389881	0.000842853	243	38517452	0.000630883	226	28642163	0.000789047	167	26103837	0.000639753	263	27161364	0.000968287	245	22945505	0.00106775	233	22183832	0.00105031	232	26358245	0.00088018	181	28730741	0.000629987	22	26223346	8.38947e-05	15	26962296	5.56332e-05	32	21374961	0.000149708	11	20608942	5.33749e-05	36	20367957	0.000176748	8
K07690 two-component system, NarL family, response regulator EvgA	0.000554895	0.0001607	0.00153783	0.000350652	5.57012e-05	0.00507195	-0.000982935	-0.0013086	-0.00065727	260	38517452	0.000675019	99	28642163	0.000345644	101	26103837	0.000386916	94	27161364	0.00034608	132	22945505	0.000575276	174	22183832	0.000784355	177	26358245	0.000671517	188	28730741	0.000654351	394	26223346	0.00150248	457	26962296	0.00169496	329	21374961	0.00153918	316	20608942	0.00153332	364	20367957	0.00178712	391
K17247 methionine sulfoxide reductase heme-binding subunit	0.00440064	0.0010287	0.00136619	0.000349284	5.30137e-05	0.00507269	0.00303444	0.00209882	0.00397007	1988	38517452	0.0051613	1262	28642163	0.00440609	1569	26103837	0.00601061	1509	27161364	0.00555569	962	22945505	0.00419254	791	22183832	0.00356566	898	26358245	0.0034069	835	28730741	0.00290629	339	26223346	0.00129274	278	26962296	0.00103107	191	21374961	0.000893569	226	20608942	0.00109661	295	20367957	0.00144835	250
K10189 lactose/L-arabinose transport system permease protein	0.00144522	0.000507676	0.00428492	0.00100037	4.49317e-05	0.00507323	-0.00283969	-0.00377976	-0.00189963	344	38517452	0.000893102	310	28642163	0.00108232	239	26103837	0.000915574	307	27161364	0.00113028	324	22945505	0.00141204	381	22183832	0.00171747	559	26358245	0.00212078	658	28730741	0.00229023	1591	26223346	0.00606711	1383	26962296	0.00512939	1041	21374961	0.00487018	954	20608942	0.00462906	799	20367957	0.00392283	633
K02895 large subunit ribosomal protein L24	0.0210451	0.000698786	0.0231769	0.000680593	4.76325e-05	0.00507376	-0.00213176	-0.00292256	-0.00134095	8006	38517452	0.0207854	5924	28642163	0.0206828	5280	26103837	0.0202269	5508	27161364	0.0202788	4962	22945505	0.0216252	4796	22183832	0.0216193	5479	26358245	0.0207867	6423	28730741	0.0223558	5878	26223346	0.0224151	6155	26962296	0.0228282	5096	21374961	0.023841	5019	20608942	0.0243535	4793	20367957	0.0235321	4236
K21471 peptidoglycan DL-endopeptidase CwlO [EC:3.4.-.-]	0.100099	0.00490537	0.084439	0.00529261	5.21379e-05	0.00507491	0.0156602	0.00980719	0.0215133	39278	38517452	0.101975	29181	28642163	0.101881	26208	26103837	0.100399	28616	27161364	0.105356	23474	22945505	0.102303	21735	22183832	0.0979768	27074	26358245	0.102715	25337	28730741	0.0881878	22822	26223346	0.0870293	23215	26962296	0.0861017	16524	21374961	0.0773054	15503	20608942	0.0752246	18023	20367957	0.088487	14781
K22468 polyphosphate kinase [EC:2.7.4.1]	0.0274363	0.00425818	0.0156382	0.0024954	4.99557e-05	0.00508153	0.0117981	0.00770561	0.0158906	9812	38517452	0.0254742	7155	28642163	0.0249807	8815	26103837	0.033769	8866	27161364	0.032642	7043	22945505	0.0306945	6155	22183832	0.0277454	5751	26358245	0.0218186	6426	28730741	0.0223663	4116	26223346	0.0156959	4087	26962296	0.0151582	2973	21374961	0.0139088	2450	20608942	0.011888	3368	20367957	0.0165358	2460
K00631 glycerol-3-phosphate O-acyltransferase [EC:2.3.1.15]	0.014532	0.00372613	0.00414746	0.00191958	5.18549e-05	0.00509125	0.0103845	0.00687601	0.013893	5355	38517452	0.0139028	3640	28642163	0.0127085	5399	26103837	0.0206828	4973	27161364	0.0183091	3919	22945505	0.0170796	3044	22183832	0.0137217	3060	26358245	0.0116093	2368	28730741	0.00824204	662	26223346	0.00252447	646	26962296	0.00239594	466	21374961	0.00218012	396	20608942	0.0019215	1228	20367957	0.00602908	1096
K02484 two-component system, OmpR family, sensor kinase [EC:2.7.13.3]	0.0451812	0.00267179	0.0360021	0.00316821	4.64574e-05	0.00509273	0.00917905	0.00581039	0.0125477	19056	38517452	0.0494737	12445	28642163	0.0434499	12626	26103837	0.0483684	12747	27161364	0.0469306	10491	22945505	0.0457214	9539	22183832	0.0429998	11233	26358245	0.0426166	12035	28730741	0.0418889	10411	26223346	0.0397013	10527	26962296	0.0390434	6671	21374961	0.0312094	6905	20608942	0.0335049	7959	20367957	0.0390761	5753
K02823 dihydroorotate dehydrogenase electron transfer subunit	0.0330778	0.00332303	0.0423744	0.0018359	4.73834e-05	0.0050953	-0.00929653	-0.012458	-0.00613506	11710	38517452	0.0304018	8888	28642163	0.0310312	7976	26103837	0.0305549	8516	27161364	0.0313534	7116	22945505	0.0310126	7367	22183832	0.0332089	9787	26358245	0.0371307	11472	28730741	0.0399294	11050	26223346	0.042138	11699	26962296	0.0433902	9682	21374961	0.045296	9260	20608942	0.044932	8262	20367957	0.0405637	7511
K10947 PadR family transcriptional regulator, regulatory protein PadR	0.029656	0.00196396	0.0350552	0.00123944	5.28896e-05	0.00510408	-0.00539911	-0.00731498	-0.00348325	11150	38517452	0.0289479	8292	28642163	0.0289503	7994	26103837	0.0306239	8366	27161364	0.0308011	6351	22945505	0.0276786	6039	22183832	0.0272225	7691	26358245	0.0291787	9724	28730741	0.0338453	9449	26223346	0.0360328	9867	26962296	0.0365955	7420	21374961	0.0347135	7183	20608942	0.0348538	6972	20367957	0.0342302	5933
K02653 type IV pilus assembly protein PilC	0.0836481	0.00503405	0.104574	0.00768044	5.78767e-05	0.00510536	-0.0209262	-0.0284833	-0.0133691	31005	38517452	0.080496	24036	28642163	0.0839182	21728	26103837	0.0832368	22673	27161364	0.0834752	17771	22945505	0.0774487	17534	22183832	0.0790395	22892	26358245	0.0868495	27214	28730741	0.0947208	27621	26223346	0.10533	30126	26962296	0.111734	23915	21374961	0.111883	24032	20608942	0.11661	19652	20367957	0.0964849	18538
K14080 [methyl-Co(III) methanol-specific corrinoid protein]	0.0135079	0.00170265	0.00772076	0.002047	5.70157e-05	0.00510924	0.0057871	0.00362195	0.00795225	5183	38517452	0.0134562	3550	28642163	0.0123943	3317	26103837	0.0127069	3737	27161364	0.0137585	3612	22945505	0.0157416	3680	22183832	0.0165887	3186	26358245	0.0120873	3255	28730741	0.0113293	1404	26223346	0.00535401	1390	26962296	0.00515535	1369	21374961	0.00640469	1272	20608942	0.00617208	1947	20367957	0.00955913	1556
K02986 small subunit ribosomal protein S4	0.0364853	0.0013528	0.0405255	0.000477115	4.61763e-05	0.00511154	-0.00404026	-0.0052729	-0.00280762	13992	38517452	0.0363264	10824	28642163	0.0377904	9300	26103837	0.0356269	9891	27161364	0.0364157	7960	22945505	0.0346909	7952	22183832	0.0358459	9449	26358245	0.0358484	11302	28730741	0.0393377	10537	26223346	0.0401818	11022	26962296	0.0408793	8758	21374961	0.0409732	8451	20608942	0.0410065	8066	20367957	0.0396014	7381
K02664 type IV pilus assembly protein PilO	0.0112466	0.000976734	0.0085274	0.000618418	4.70955e-05	0.00511303	0.00271915	0.00176566	0.00367265	4282	38517452	0.011117	3125	28642163	0.0109105	3223	26103837	0.0123468	3231	27161364	0.0118956	2804	22945505	0.0122203	2626	22183832	0.0118374	2723	26358245	0.0103307	2676	28730741	0.00931407	2115	26223346	0.00806533	2225	26962296	0.00825226	1722	21374961	0.00805616	1936	20608942	0.00939398	1985	20367957	0.0097457	1519
K09931 uncharacterized protein	0.0102816	0.00160698	0.00583576	0.000805606	5.66173e-05	0.00511413	0.00444581	0.00293808	0.00595353	3801	38517452	0.00986825	2492	28642163	0.00870046	3143	26103837	0.0120404	3343	27161364	0.0123079	2733	22945505	0.0119108	2388	22183832	0.0107646	2295	26358245	0.00870695	2285	28730741	0.00795315	1302	26223346	0.00496504	1195	26962296	0.00443212	1162	21374961	0.00543627	1200	20608942	0.00582272	1423	20367957	0.00698646	1108
K09857 uncharacterized protein	0.00461378	0.000805312	0.0015391	0.00111985	5.75857e-05	0.00511969	0.00307468	0.00194579	0.00420357	1636	38517452	0.00424743	1368	28642163	0.00477618	1384	26103837	0.0053019	1414	27161364	0.00520592	1211	22945505	0.00527772	1194	22183832	0.0053823	915	26358245	0.0034714	933	28730741	0.00324739	132	26223346	0.000503368	101	26962296	0.000374597	128	21374961	0.000598832	133	20608942	0.000645351	687	20367957	0.00337295	544
K19156 antitoxin PrlF	0.00299412	0.000597118	0.00132499	0.000355726	4.58299e-05	0.00512342	0.00166913	0.00109346	0.00224479	1280	38517452	0.00332317	872	28642163	0.00304446	821	26103837	0.00314513	913	27161364	0.00336139	727	22945505	0.00316838	844	22183832	0.00380457	607	26358245	0.00230288	518	28730741	0.00180295	338	26223346	0.00128893	291	26962296	0.00107928	212	21374961	0.000991815	164	20608942	0.000795771	403	20367957	0.0019786	297
K03649 double-stranded uracil-DNA glycosylase [EC:3.2.2.28]	0.00278299	0.000658555	0.000903335	0.000250329	5.99036e-05	0.00512402	0.00187965	0.00127708	0.00248223	920	38517452	0.00238853	751	28642163	0.00262201	893	26103837	0.00342095	1039	27161364	0.00382529	760	22945505	0.0033122	596	22183832	0.00268664	629	26358245	0.00238635	466	28730741	0.00162196	181	26223346	0.000690225	199	26962296	0.000738068	93	21374961	0.000435089	203	20608942	0.000985009	247	20367957	0.00121269	189
K18290 itaconyl-CoA hydratase [EC:4.2.1.56]	0.00117135	0.000274799	0.000421009	0.000194294	5.9603e-05	0.00513723	0.000750345	0.000474648	0.00102604	458	38517452	0.00118907	263	28642163	0.000918227	406	26103837	0.00155533	416	27161364	0.00153159	307	22945505	0.00133795	220	22183832	0.000991713	296	26358245	0.00112299	208	28730741	0.000723963	97	26223346	0.000369899	38	26962296	0.000140938	37	21374961	0.0001731	68	20608942	0.000329954	100	20367957	0.000490967	118
K18661 malonyl-CoA/methylmalonyl-CoA synthetase [EC:6.2.1.-]	0.0098859	0.00149987	0.00580925	0.00098819	5.93098e-05	0.00515128	0.00407665	0.00259904	0.00555426	3327	38517452	0.00863764	2360	28642163	0.0082396	3027	26103837	0.011596	2939	27161364	0.0108205	2478	22945505	0.0107995	2622	22183832	0.0118194	2526	26358245	0.00958334	2181	28730741	0.00759117	1344	26223346	0.0051252	1181	26962296	0.00438019	1207	21374961	0.00564679	1020	20608942	0.00494931	1440	20367957	0.00706993	1339
K07465 putative RecB family exonuclease	0.0117551	0.0021676	0.0057538	0.00167067	5.88805e-05	0.00515364	0.00600127	0.00376917	0.00823338	4603	38517452	0.0119504	3807	28642163	0.0132916	3289	26103837	0.0125997	3881	27161364	0.0142887	3047	22945505	0.0132793	2666	22183832	0.0120178	2445	26358245	0.00927603	2108	28730741	0.00733709	1041	26223346	0.00396975	1478	26962296	0.00548173	988	21374961	0.00462223	925	20608942	0.00448834	1778	20367957	0.0087294	1437
K07102 N-acetylmuramate 1-kinase [EC:2.7.1.221]	0.0133769	0.00166847	0.00881609	0.00123338	6.22169e-05	0.00528189	0.00456076	0.0028651	0.00625642	5452	38517452	0.0141546	3726	28642163	0.0130088	4165	26103837	0.0159555	4065	27161364	0.0149661	3117	22945505	0.0135844	2981	22183832	0.0134377	2747	26358245	0.0104218	3300	28730741	0.011486	1959	26223346	0.00747044	2250	26962296	0.00834499	1563	21374961	0.00731229	1539	20608942	0.00746763	2088	20367957	0.0102514	1740
K07034 uncharacterized protein	0.00674937	0.00137447	0.0105053	0.00102717	6.34142e-05	0.00534336	-0.00375592	-0.00515744	-0.00235439	2071	38517452	0.00537678	1801	28642163	0.00628793	1436	26103837	0.00550111	1607	27161364	0.00591649	1420	22945505	0.00618858	1477	22183832	0.006658	2361	26358245	0.00895735	2617	28730741	0.00910871	2949	26223346	0.0112457	2714	26962296	0.0100659	2279	21374961	0.010662	2430	20608942	0.011791	2061	20367957	0.0101188	2150
K03782 catalase-peroxidase [EC:1.11.1.21]	0.0435011	0.00703393	0.0243681	0.00357284	6.45731e-05	0.0054007	0.0191329	0.0125223	0.0257436	18169	38517452	0.0471708	13462	28642163	0.0470006	11713	26103837	0.0448708	12549	27161364	0.0462017	11975	22945505	0.0521889	10218	22183832	0.0460606	7551	26358245	0.0286476	10305	28730741	0.0358675	5583	26223346	0.0212902	5847	26962296	0.0216858	4345	21374961	0.0203275	4417	20608942	0.0214324	5239	20367957	0.0257218	4585
K14638 solute carrier family 15 (peptide/histidine transporter), member 3/4	0.00241165	0.000430588	0.00066563	0.000383325	1.46838e-06	0.00552647	0.00174602	0.0012781	0.00221394	1007	38517452	0.0026144	619	28642163	0.00216115	773	26103837	0.00296125	792	27161364	0.00291591	451	22945505	0.00196553	606	22183832	0.00273172	588	26358245	0.0022308	492	28730741	0.00171245	82	26223346	0.000312698	87	26962296	0.000322673	80	21374961	0.00037427	53	20608942	0.00025717	179	20367957	0.000878831	145
K06202 CyaY protein	0.000559745	0.000179189	7.39167e-05	8.90048e-05	6.76876e-05	0.00557855	0.000485828	0.000317901	0.000653756	201	38517452	0.000521841	148	28642163	0.000516721	220	26103837	0.000842788	194	27161364	0.00071425	165	22945505	0.000719095	118	22183832	0.000531919	71	26358245	0.000269365	104	28730741	0.000361982	0	26223346	0	0	26962296	0	0	21374961	0	3	20608942	1.45568e-05	12	20367957	5.89161e-05	14
K02600 N utilization substance protein A	0.0690151	0.00281204	0.0765611	0.00189268	6.74915e-05	0.00560328	-0.007546	-0.0103308	-0.00476117	26250	38517452	0.0681509	19432	28642163	0.067844	17251	26103837	0.0660861	17960	27161364	0.0661233	16047	22945505	0.0699353	15236	22183832	0.0686806	18385	26358245	0.0697505	21706	28730741	0.0755497	19324	26223346	0.0736901	20109	26962296	0.0745819	16744	21374961	0.0783346	15810	20608942	0.0767143	15275	20367957	0.0749952	14249
K18816 aminoglycoside 6'-N-acetyltransferase I [EC:2.3.1.82]	0.00272121	0.000399892	0.00127582	0.000532996	6.86445e-05	0.00561641	0.00144539	0.000901236	0.00198955	925	38517452	0.00240151	800	28642163	0.00279309	699	26103837	0.00267777	838	27161364	0.00308526	729	22945505	0.00317709	661	22183832	0.00297965	739	26358245	0.00280368	532	28730741	0.00185168	181	26223346	0.000690225	223	26962296	0.000827081	189	21374961	0.000884212	135	20608942	0.000655055	301	20367957	0.00147781	340
K11070 spermidine/putrescine transport system permease protein	0.0103571	0.00112975	0.00685701	0.00122129	7.10867e-05	0.00569248	0.00350007	0.00215062	0.00484951	4067	38517452	0.0105589	3041	28642163	0.0106172	3062	26103837	0.0117301	3274	27161364	0.0120539	2450	22945505	0.0106775	2044	22183832	0.00921392	2278	26358245	0.00864246	2690	28730741	0.00936279	1686	26223346	0.00642939	1748	26962296	0.00648313	1314	21374961	0.00614738	1068	20608942	0.00518222	1238	20367957	0.00607817	1247
K02347 DNA polymerase (family X)	0.0681267	0.00380156	0.0782491	0.00240607	7.08394e-05	0.0057132	-0.0101223	-0.0138331	-0.00641151	26501	38517452	0.0688026	19824	28642163	0.0692126	16728	26103837	0.0640825	17691	27161364	0.065133	14820	22945505	0.0645878	15181	22183832	0.0684327	17902	26358245	0.067918	22078	28730741	0.0768445	20202	26223346	0.0770382	20520	26962296	0.0761063	17867	21374961	0.0835885	16393	20608942	0.0795431	15694	20367957	0.0770524	14389
K03354 anaphase-promoting complex subunit 7	0.000870159	0.000269323	0.000126302	0.000106786	7.36965e-05	0.00573867	0.000743856	0.000496749	0.000990963	292	38517452	0.000758098	145	28642163	0.000506247	293	26103837	0.00112244	369	27161364	0.00135855	162	22945505	0.000706021	163	22183832	0.000734769	289	26358245	0.00109643	195	28730741	0.000678716	0	26223346	0	27	26962296	0.00010014	6	21374961	2.80702e-05	21	20608942	0.000101898	40	20367957	0.000196387	4
K11731 citronellyl-CoA dehydrogenase [EC:1.3.99.-]	0.00624758	0.000549948	0.00378059	0.000926133	7.07375e-05	0.00574603	0.00246698	0.00157468	0.00335929	2482	38517452	0.00644383	1584	28642163	0.00553031	1776	26103837	0.0068036	1852	27161364	0.00681851	1530	22945505	0.00666797	1452	22183832	0.00654531	1528	26358245	0.00579705	1544	28730741	0.00537403	711	26223346	0.00271132	857	26962296	0.00317851	621	21374961	0.00290527	1094	20608942	0.00530838	715	20367957	0.00351042	646
K01770 2-C-methyl-D-erythritol 2,4-cyclodiphosphate synthase [EC:4.6.1.12]	0.0197959	0.00130274	0.0232491	0.000809262	7.36178e-05	0.00577235	-0.00345326	-0.0047198	-0.00218671	7156	38517452	0.0185786	5404	28642163	0.0188673	4890	26103837	0.0187329	5129	27161364	0.0188834	4504	22945505	0.0196291	4414	22183832	0.0198974	5642	26358245	0.0214051	6428	28730741	0.0223732	6216	26223346	0.0237041	6241	26962296	0.0231471	5322	21374961	0.0248983	4675	20608942	0.0226843	4500	20367957	0.0220935	4162
K00600 glycine hydroxymethyltransferase [EC:2.1.2.1]	0.0705175	0.00428968	0.0819417	0.0023448	7.33196e-05	0.00578917	-0.0114242	-0.0154984	-0.00735003	28030	38517452	0.0727722	19942	28642163	0.0696246	16815	26103837	0.0644158	17764	27161364	0.0654017	16356	22945505	0.0712819	15244	22183832	0.0687167	19306	26358245	0.0732446	22606	28730741	0.0786823	21959	26223346	0.0837384	23223	26962296	0.0861314	17601	21374961	0.082344	17265	20608942	0.0837743	16046	20367957	0.0787806	14405
K12942 aminobenzoyl-glutamate transport protein	0.011138	0.00340414	0.00207316	0.00180303	7.48739e-05	0.00579042	0.00906484	0.00584701	0.0122827	3543	38517452	0.00919843	2471	28642163	0.00862714	4204	26103837	0.0161049	4342	27161364	0.0159859	2981	22945505	0.0129917	2361	22183832	0.0106429	2583	26358245	0.00979959	1653	28730741	0.00575342	76	26223346	0.000289818	55	26962296	0.000203989	41	21374961	0.000191813	88	20608942	0.000426999	772	20367957	0.00379027	756
K04760 transcription elongation factor GreB	0.002473	0.000407313	0.000920797	0.000581307	7.29087e-05	0.00579727	0.0015522	0.00097044	0.00213396	1151	38517452	0.00298826	675	28642163	0.00235667	803	26103837	0.00307618	773	27161364	0.00284595	467	22945505	0.00203526	482	22183832	0.00217275	522	26358245	0.0019804	669	28730741	0.00232852	177	26223346	0.000674971	112	26962296	0.000415395	108	21374961	0.000505264	119	20608942	0.000577419	184	20367957	0.00090338	94
K16051 3-oxo-5alpha-steroid 4-dehydrogenase [EC:1.3.99.5]	0.00630184	0.0010736	0.00336055	0.000422954	7.90165e-05	0.00586957	0.00294129	0.00195669	0.00392589	2048	38517452	0.00531707	1475	28642163	0.00514975	1742	26103837	0.00667335	1780	27161364	0.00655343	1827	22945505	0.00796234	1427	22183832	0.00643261	1993	26358245	0.0075612	1369	28730741	0.00476493	971	26223346	0.00370281	1023	26962296	0.00379419	613	21374961	0.00286784	614	20608942	0.00297929	663	20367957	0.00325511	616
K10188 lactose/L-arabinose transport system substrate-binding protein	0.00170023	0.000598649	0.00520151	0.00129923	7.64187e-05	0.00586969	-0.00350128	-0.00470859	-0.00229397	439	38517452	0.00113974	446	28642163	0.00155714	278	26103837	0.00106498	334	27161364	0.00122969	380	22945505	0.0016561	363	22183832	0.00163633	654	26358245	0.0024812	815	28730741	0.00283668	1721	26223346	0.00656285	1657	26962296	0.00614562	1449	21374961	0.00677896	1087	20608942	0.00527441	1075	20367957	0.0052779	943
K06181 23S rRNA pseudouridine2457 synthase [EC:5.4.99.20]	0.00172202	0.000369055	0.000669061	0.000107556	7.88891e-05	0.00589892	0.00105296	0.000719201	0.00138673	682	38517452	0.00177063	534	28642163	0.00186438	564	26103837	0.0021606	596	27161364	0.00219429	369	22945505	0.00160816	364	22183832	0.00164083	422	26358245	0.00160102	269	28730741	0.000936279	133	26223346	0.000507182	203	26962296	0.000752903	124	21374961	0.000580118	131	20608942	0.000635646	130	20367957	0.000638257	158
K01803 triosephosphate isomerase (TIM) [EC:5.3.1.1]	0.0440906	0.00200749	0.0493904	0.00139195	8.02741e-05	0.00592402	-0.00529979	-0.00730319	-0.00329639	16788	38517452	0.0435854	12308	28642163	0.0429716	11226	26103837	0.0430052	11234	27161364	0.0413602	9768	22945505	0.0425704	10086	22183832	0.0454655	12075	26358245	0.0458111	13778	28730741	0.0479556	13350	26223346	0.0509088	13420	26962296	0.0497732	10475	21374961	0.0490059	10650	20608942	0.0516766	9921	20367957	0.0487089	8956
K01869 leucyl-tRNA synthetase [EC:6.1.1.4]	0.123956	0.00516724	0.137909	0.00228789	7.82683e-05	0.00593106	-0.0139532	-0.0187363	-0.0091701	49971	38517452	0.129736	37084	28642163	0.129473	30535	26103837	0.116975	32781	27161364	0.12069	27848	22945505	0.121366	26474	22183832	0.119339	32257	26358245	0.122379	37836	28730741	0.131692	35996	26223346	0.137267	37052	26962296	0.137422	29702	21374961	0.138957	28835	20608942	0.139915	27400	20367957	0.134525	25586
K15270 S-adenosylmethionine uptake transporter	0.00422676	0.00120827	0.000999303	0.000590418	7.77591e-05	0.00593229	0.00322745	0.00209737	0.00435754	1325	38517452	0.00344	854	28642163	0.00298162	1583	26103837	0.00606424	1717	27161364	0.00632148	1036	22945505	0.00451505	813	22183832	0.00366483	871	26358245	0.00330447	1012	28730741	0.00352236	240	26223346	0.000915215	210	26962296	0.000778865	95	21374961	0.000444445	117	20608942	0.000567715	177	20367957	0.000869012	88
K00764 amidophosphoribosyltransferase [EC:2.4.2.14]	0.0932867	0.002343	0.102909	0.00365553	7.88516e-05	0.00593542	-0.00962217	-0.0132005	-0.00604388	34675	38517452	0.0900241	26613	28642163	0.0929155	23929	26103837	0.0916685	25089	27161364	0.0923702	21257	22945505	0.0926412	20844	22183832	0.0939603	24810	26358245	0.0941261	28325	28730741	0.0985878	27194	26223346	0.103701	27631	26962296	0.10248	22105	21374961	0.103415	21300	20608942	0.103353	21958	20367957	0.107807	19398
K11072 spermidine/putrescine transport system ATP-binding protein [EC:3.6.3.31]	0.0171095	0.00177905	0.0124308	0.0012604	8.49761e-05	0.00595941	0.00467864	0.00289278	0.0064645	6848	38517452	0.017779	5167	28642163	0.0180398	5146	26103837	0.0197136	5108	27161364	0.0188061	4041	22945505	0.0176113	3404	22183832	0.0153445	3810	26358245	0.0144547	4346	28730741	0.0151267	3267	26223346	0.0124584	3369	26962296	0.0124952	2385	21374961	0.0111579	2157	20608942	0.0104663	2617	20367957	0.0128486	2093
K07131 uncharacterized protein	0.00519085	0.000678451	0.00314904	0.000719591	8.47336e-05	0.00597954	0.00204181	0.00123982	0.0028438	2282	38517452	0.00592459	1360	28642163	0.00474824	1518	26103837	0.00581524	1562	27161364	0.00575082	1207	22945505	0.00526029	1165	22183832	0.00525157	1338	26358245	0.00507621	1063	28730741	0.00369987	788	26223346	0.00300496	820	26962296	0.00304128	488	21374961	0.00228305	412	20608942	0.00199913	680	20367957	0.00333858	594
K02904 large subunit ribosomal protein L29	0.0153628	0.000655152	0.0170737	0.000412264	8.43414e-05	0.0059893	-0.00171088	-0.00234959	-0.00107218	5613	38517452	0.0145726	4273	28642163	0.0149186	3924	26103837	0.0150323	4096	27161364	0.0150802	3652	22945505	0.015916	3542	22183832	0.0159666	3911	26358245	0.0148379	4763	28730741	0.0165781	4426	26223346	0.0168781	4539	26962296	0.0168346	3535	21374961	0.016538	3539	20608942	0.0171722	3442	20367957	0.0168991	3247
K06927 diphthine-ammonia ligase [EC:6.3.1.14]	0.00833364	0.00387514	0.0186103	0.00188057	8.30365e-05	0.00601003	-0.0102766	-0.0138981	-0.00665516	1865	38517452	0.00484196	1483	28642163	0.00517768	1131	26103837	0.0043327	1357	27161364	0.00499607	2129	22945505	0.00927851	2316	22183832	0.01044	3192	26358245	0.0121101	4451	28730741	0.0154921	4690	26223346	0.0178848	5203	26962296	0.0192973	4625	21374961	0.0216375	4276	20608942	0.0207483	3401	20367957	0.0166978	3497
K00329 NADH dehydrogenase [EC:7.1.1.2]	0.00977944	0.00105769	0.00661926	0.00110077	8.19781e-05	0.00601048	0.00316018	0.00192248	0.00439788	3798	38517452	0.00986047	2520	28642163	0.00879822	2910	26103837	0.0111478	3012	27161364	0.0110893	2058	22945505	0.00896908	1897	22183832	0.00855127	2336	26358245	0.0088625	3148	28730741	0.0109569	1797	26223346	0.00685267	1868	26962296	0.00692819	1254	21374961	0.00586668	1174	20608942	0.00569656	1091	20367957	0.00535645	1022
K15512 benzoyl-CoA 2,3-epoxidase subunit B [EC:1.14.13.208]	0.00195872	0.000563061	0.000484497	0.000372066	8.37763e-05	0.00602496	0.00147422	0.000919124	0.00202932	759	38517452	0.00197054	534	28642163	0.00186438	794	26103837	0.0030417	729	27161364	0.00268396	396	22945505	0.00172583	356	22183832	0.00160477	370	26358245	0.00140374	395	28730741	0.00137483	41	26223346	0.000156349	76	26962296	0.000281875	24	21374961	0.000112281	48	20608942	0.000232909	133	20367957	0.000652986	54
K05389 potassium channel subfamily K, other eukaryote	0.000324623	9.62914e-05	7.32381e-05	5.87869e-05	8.4337e-05	0.00602689	0.000251385	0.000158104	0.000344666	95	38517452	0.000246641	98	28642163	0.000342153	125	26103837	0.000478857	81	27161364	0.000298218	98	22945505	0.000427099	84	22183832	0.000378654	69	26358245	0.000261778	47	28730741	0.000163588	8	26223346	3.05072e-05	11	26962296	4.07977e-05	0	21374961	0	0	20608942	0	27	20367957	0.000132561	28
K01535 H+-transporting ATPase [EC:7.1.2.1]	0.00542955	0.0041927	0.0168559	0.00350747	8.28407e-05	0.00603454	-0.0114264	-0.0158707	-0.00698206	495	38517452	0.00128513	362	28642163	0.00126387	561	26103837	0.00214911	835	27161364	0.00307422	1378	22945505	0.00600553	1502	22183832	0.0067707	2287	26358245	0.0086766	4083	28730741	0.0142113	5474	26223346	0.0208745	5299	26962296	0.0196534	4728	21374961	0.0221193	3405	20608942	0.016522	2479	20367957	0.0121711	2201
K08218 MFS transporter, PAT family, beta-lactamase induction signal transducer AmpG	0.0170541	0.00203328	0.0117658	0.00120348	8.74142e-05	0.00609256	0.00528832	0.00333051	0.00724613	7279	38517452	0.0188979	5167	28642163	0.0180398	5043	26103837	0.019319	5092	27161364	0.0187472	3801	22945505	0.0165653	3678	22183832	0.0165796	3390	26358245	0.0128613	4431	28730741	0.0154225	2611	26223346	0.00995678	2776	26962296	0.0102959	2276	21374961	0.010648	2420	20608942	0.0117425	2601	20367957	0.0127701	2333
K09748 ribosome maturation factor RimP	0.011473	0.0012036	0.00828193	0.000926293	8.89158e-05	0.00615919	0.00319103	0.00195222	0.00442985	4249	38517452	0.0110314	2891	28642163	0.0100935	3430	26103837	0.0131398	3506	27161364	0.012908	2873	22945505	0.012521	2605	22183832	0.0117428	2621	26358245	0.00994376	2989	28730741	0.0104035	2004	26223346	0.00764205	1969	26962296	0.00730279	1594	21374961	0.00745732	1512	20608942	0.00733662	2035	20367957	0.00999118	1626
K03758 arginine	0.00373473	0.00109335	0.0009033	0.000721873	9.25231e-05	0.00621832	0.00283143	0.00175375	0.0039091	1081	38517452	0.00280652	921	28642163	0.00321554	1473	26103837	0.00564285	1069	27161364	0.00393574	1189	22945505	0.00518184	826	22183832	0.00372343	582	26358245	0.00220804	909	28730741	0.00316386	51	26223346	0.000194483	98	26962296	0.000363471	83	21374961	0.000388305	31	20608942	0.00015042	228	20367957	0.00111941	177
K03545 trigger factor	0.0574644	0.00212274	0.0631943	0.00179487	9.3649e-05	0.00621995	-0.00572986	-0.00798921	-0.00347051	20901	38517452	0.0542637	16279	28642163	0.0568358	15225	26103837	0.0583248	15650	27161364	0.0576186	13206	22945505	0.0575538	12403	22183832	0.0559101	15037	26358245	0.0570486	17859	28730741	0.0621599	16757	26223346	0.0639011	16823	26962296	0.0623945	13544	21374961	0.0633639	13015	20608942	0.0631522	12304	20367957	0.0604086	11019
K18199 cyclohexyl-isocyanide hydratase [EC:4.2.1.103]	0.00452341	0.00070858	0.00263985	0.000297653	9.34937e-05	0.00624638	0.00188356	0.00123062	0.00253649	1609	38517452	0.00417733	1139	28642163	0.00397665	1368	26103837	0.00524061	1287	27161364	0.00473835	1283	22945505	0.00559151	1131	22183832	0.00509831	1043	26358245	0.00395702	979	28730741	0.0034075	644	26223346	0.00245583	769	26962296	0.00285213	571	21374961	0.00267135	487	20608942	0.00236305	564	20367957	0.00276906	474
K07391 magnesium chelatase family protein	0.0765309	0.00321963	0.0848896	0.00219926	9.25046e-05	0.00625431	-0.00835865	-0.0115591	-0.00515818	29437	38517452	0.0764251	22332	28642163	0.077969	19778	26103837	0.0757666	20207	27161364	0.0743961	17077	22945505	0.0744242	15796	22183832	0.071205	21069	26358245	0.0799332	23596	28730741	0.0821281	22238	26223346	0.0848023	23342	26962296	0.0865727	18220	21374961	0.0852399	18155	20608942	0.0880928	16642	20367957	0.0817068	15041
K01972 DNA ligase (NAD+) [EC:6.5.1.2]	0.101042	0.00332939	0.113619	0.00485637	9.48755e-05	0.00626456	-0.0125772	-0.0174092	-0.00774513	39090	38517452	0.101486	29520	28642163	0.103065	24945	26103837	0.0955607	26567	27161364	0.0978117	22916	22945505	0.0998714	22467	22183832	0.101276	26817	26358245	0.10174	30892	28730741	0.107522	29394	26223346	0.112091	30046	26962296	0.111437	25561	21374961	0.119584	24367	20608942	0.118235	23636	20367957	0.116045	21337
K13774 citronellol/citronellal dehydrogenase	0.00165905	0.000463822	0.00046076	0.000320775	9.77595e-05	0.0062716	0.00119829	0.000735734	0.00166085	532	38517452	0.00138119	301	28642163	0.0010509	687	26103837	0.0026318	533	27161364	0.00196235	423	22945505	0.0018435	299	22183832	0.00134783	452	26358245	0.00171483	385	28730741	0.00134003	48	26223346	0.000183043	43	26962296	0.000159482	42	21374961	0.000196492	74	20608942	0.000359067	136	20367957	0.000667715	55
K03664 SsrA-binding protein	0.0265926	0.00132204	0.030998	0.00165485	9.23967e-05	0.00628465	-0.00440539	-0.00613032	-0.00268046	10263	38517452	0.0266451	7829	28642163	0.0273338	6385	26103837	0.02446	6767	27161364	0.0249141	6125	22945505	0.0266937	5805	22183832	0.0261677	7349	26358245	0.0278812	8230	28730741	0.0286453	8413	26223346	0.0320821	8512	26962296	0.03157	6901	21374961	0.0322854	6398	20608942	0.0310448	6654	20367957	0.032669	5742
K01608 tartronate-semialdehyde synthase [EC:4.1.1.47]	0.0042307	0.000883528	0.00183768	0.000763876	9.69296e-05	0.00628984	0.00239302	0.00144435	0.00334168	1347	38517452	0.00349712	919	28642163	0.00320856	1297	26103837	0.00496862	1236	27161364	0.00455058	1240	22945505	0.00540411	1163	22183832	0.00524256	1052	26358245	0.00399116	857	28730741	0.00298287	257	26223346	0.000980043	240	26962296	0.000890132	238	21374961	0.00111345	317	20608942	0.00153817	596	20367957	0.00292616	506
K01459 N-carbamoyl-D-amino-acid hydrolase [EC:3.5.1.77]	0.00128573	0.000422796	0.00018101	0.000196017	9.75573e-05	0.00629439	0.00110472	0.000711588	0.00149786	501	38517452	0.00130071	356	28642163	0.00124292	516	26103837	0.00197672	401	27161364	0.00147636	389	22945505	0.00169532	272	22183832	0.00122612	155	26358245	0.000588051	224	28730741	0.000779653	0	26223346	0	19	26962296	7.04688e-05	3	21374961	1.40351e-05	0	20608942	0	45	20367957	0.000220935	27
K12972 glyoxylate/hydroxypyruvate reductase [EC:1.1.1.79 1.1.1.81]	0.00492063	0.00115404	0.00179837	0.000410837	9.64477e-05	0.00629474	0.00312226	0.00207023	0.00417429	1892	38517452	0.00491206	1495	28642163	0.00521958	1534	26103837	0.00587653	1754	27161364	0.0064577	1254	22945505	0.00546512	1171	22183832	0.00527862	861	26358245	0.00326653	830	28730741	0.00288889	381	26223346	0.0014529	365	26962296	0.00135374	317	21374961	0.00148304	295	20608942	0.00143142	480	20367957	0.00235664	388
K00632 acetyl-CoA acyltransferase [EC:2.3.1.16]	0.0448906	0.00578385	0.0298854	0.00313713	9.21639e-05	0.0063068	0.0150052	0.00951849	0.020492	18867	38517452	0.048983	14004	28642163	0.048893	12567	26103837	0.0481423	12792	27161364	0.0470963	11444	22945505	0.0498747	9654	22183832	0.0435182	10826	26358245	0.0410725	9063	28730741	0.0315446	7432	26223346	0.0283412	7884	26962296	0.0292408	5446	21374961	0.0254784	5702	20608942	0.0276676	6853	20367957	0.033646	6438
K03685 ribonuclease III [EC:3.1.26.3]	0.0378472	0.00185496	0.0453377	0.00291007	9.63013e-05	0.00632173	-0.00749049	-0.0103356	-0.00464542	14300	38517452	0.037126	11457	28642163	0.0400005	9719	26103837	0.0372321	9335	27161364	0.0343687	8620	22945505	0.0375673	8376	22183832	0.0377572	9950	26358245	0.0377491	11773	28730741	0.040977	12464	26223346	0.0475302	12765	26962296	0.0473439	10336	21374961	0.0483556	10033	20608942	0.0486828	8748	20367957	0.0429498	8162
K07576 metallo-beta-lactamase family protein	0.0638735	0.00227026	0.0697513	0.00129267	9.18464e-05	0.0063234	-0.00587778	-0.00804853	-0.00370702	24637	38517452	0.0639632	18909	28642163	0.0660181	15646	26103837	0.0599375	17280	27161364	0.0636198	14870	22945505	0.0648057	14018	22183832	0.0631902	16264	26358245	0.0617037	19465	28730741	0.0677497	17833	26223346	0.0680043	18897	26962296	0.0700868	14998	21374961	0.0701662	14524	20608942	0.0704743	13686	20367957	0.0671938	12755
K17321 glycerol transport system substrate-binding protein	0.00118514	0.00014853	0.000451457	0.0002848	0.000100046	0.00634621	0.000733683	0.000465063	0.0010023	544	38517452	0.00141235	343	28642163	0.00119754	301	26103837	0.00115309	281	27161364	0.00103456	221	22945505	0.000963152	308	22183832	0.0013884	289	26358245	0.00109643	355	28730741	0.00123561	36	26223346	0.000137282	79	26962296	0.000293002	21	21374961	9.82458e-05	56	20608942	0.000271727	202	20367957	0.000991754	114
K02676 type IV pilus assembly protein PilZ	0.00311122	0.000846705	0.000924349	0.000427825	0.000100018	0.00638024	0.00218687	0.00139165	0.00298208	968	38517452	0.00251315	539	28642163	0.00188184	1132	26103837	0.00433653	1043	27161364	0.00384001	846	22945505	0.003687	836	22183832	0.00376851	712	26358245	0.00270124	621	28730741	0.00216145	128	26223346	0.000488115	107	26962296	0.00039685	91	21374961	0.000425732	188	20608942	0.000912225	328	20367957	0.00161037	197
K08295 2-aminobenzoate-CoA ligase [EC:6.2.1.32]	0.00163232	0.000463993	0.000433085	0.000334761	0.000101982	0.00639713	0.00119924	0.000731058	0.00166741	857	38517452	0.00222497	592	28642163	0.00206688	490	26103837	0.00187712	587	27161364	0.00216116	292	22945505	0.00127258	268	22183832	0.00120809	320	26358245	0.00121404	297	28730741	0.00103374	43	26223346	0.000163976	84	26962296	0.000311546	69	21374961	0.000322808	8	20608942	3.88181e-05	85	20367957	0.000417322	48
K05306 phosphonoacetaldehyde hydrolase [EC:3.11.1.1]	0.00251399	0.00065215	0.000846481	0.000377262	0.000101862	0.00642527	0.00166751	0.00104221	0.00229282	1056	38517452	0.00274161	612	28642163	0.00213671	880	26103837	0.00337115	817	27161364	0.00300795	604	22945505	0.00263232	683	22183832	0.00307882	479	26358245	0.00181727	381	28730741	0.00132611	123	26223346	0.000469048	146	26962296	0.000541497	95	21374961	0.000444445	140	20608942	0.000679317	313	20367957	0.00153673	240
K03106 signal recognition particle subunit SRP54 [EC:3.6.5.4]	0.0628086	0.00160882	0.0680306	0.00197671	0.000103843	0.00644228	-0.00522209	-0.00729619	-0.00314798	23741	38517452	0.061637	17895	28642163	0.0624778	15918	26103837	0.0609795	16606	27161364	0.0611383	14673	22945505	0.0639472	14105	22183832	0.0635823	16490	26358245	0.0625611	19004	28730741	0.0661452	18560	26223346	0.0707766	18482	26962296	0.0685476	14843	21374961	0.0694411	14335	20608942	0.0695572	13742	20367957	0.0674687	12340
K02886 large subunit ribosomal protein L2	0.0445136	0.00187422	0.0495423	0.00066005	0.000103694	0.00646857	-0.00502866	-0.00673627	-0.00332104	17184	38517452	0.0446135	13055	28642163	0.0455797	11275	26103837	0.0431929	11782	27161364	0.0433778	9974	22945505	0.0434682	9425	22183832	0.0424859	11743	26358245	0.0445515	14032	28730741	0.0488397	13190	26223346	0.0502987	13138	26962296	0.0487273	10611	21374961	0.0496422	10280	20608942	0.0498813	10205	20367957	0.0501032	8859
K08776 puromycin-sensitive aminopeptidase [EC:3.4.11.-]	0.00607539	0.00159991	0.00199809	0.000824573	0.000110274	0.00655317	0.0040773	0.00257075	0.00558386	1509	38517452	0.0039177	1213	28642163	0.00423502	2016	26103837	0.007723	2085	27161364	0.00767634	1509	22945505	0.00657645	1548	22183832	0.00697806	1967	26358245	0.00746256	1159	28730741	0.00403401	710	26223346	0.00270751	213	26962296	0.000789992	230	21374961	0.00107603	218	20608942	0.00105779	580	20367957	0.00284761	501
K00800 3-phosphoshikimate 1-carboxyvinyltransferase [EC:2.5.1.19]	0.0465262	0.00283236	0.0543108	0.00263791	0.000109769	0.00655766	-0.0077846	-0.0109237	-0.00464548	17473	38517452	0.0453639	13694	28642163	0.0478106	11350	26103837	0.0434802	11782	27161364	0.0433778	10266	22945505	0.0447408	10312	22183832	0.0464843	12791	26358245	0.0485275	15062	28730741	0.0524247	14855	26223346	0.056648	15179	26962296	0.0562971	12308	21374961	0.0575814	11753	20608942	0.0570286	10332	20367957	0.0507267	9432
K01753 D-serine dehydratase [EC:4.3.1.18]	0.00149401	0.000401069	0.000460764	0.00030111	0.000111403	0.00658561	0.00103325	0.000623701	0.0014428	394	38517452	0.00102291	316	28642163	0.00110327	506	26103837	0.00193841	424	27161364	0.00156104	526	22945505	0.00229239	307	22183832	0.00138389	338	26358245	0.00128233	393	28730741	0.00136787	65	26223346	0.000247871	88	26962296	0.000326382	21	21374961	9.82458e-05	66	20608942	0.000320249	153	20367957	0.00075118	51
K08354 thiosulfate reductase cytochrome b subunit	0.00364533	0.000826466	0.00152803	0.000592486	0.000109751	0.00659148	0.0021173	0.0012849	0.0029497	1596	38517452	0.00414358	884	28642163	0.00308636	1179	26103837	0.00451658	1240	27161364	0.00456531	841	22945505	0.00366521	950	22183832	0.0042824	608	26358245	0.00230668	746	28730741	0.00259652	257	26223346	0.000980043	348	26962296	0.00129069	230	21374961	0.00107603	156	20608942	0.000756953	545	20367957	0.00267577	338
K03721 transcriptional regulator of aroF, aroG, tyrA and aromatic amino acid transport	0.00279556	0.0009223	0.00541322	0.000920537	0.000109189	0.00659279	-0.00261767	-0.00367401	-0.00156132	954	38517452	0.0024768	957	28642163	0.00334123	449	26103837	0.00172005	416	27161364	0.00153159	1026	22945505	0.00447146	587	22183832	0.00264607	664	26358245	0.00251914	1051	28730741	0.0036581	1753	26223346	0.00668488	1693	26962296	0.00627914	1111	21374961	0.00519767	1270	20608942	0.00616237	953	20367957	0.00467892	1055
K08363 mercuric ion transport protein	0.000723441	0.000199353	0.000201311	0.000158796	0.000107097	0.00660782	0.000522131	0.000314547	0.000729714	375	38517452	0.000973585	248	28642163	0.000865856	123	26103837	0.000471195	221	27161364	0.000813656	217	22945505	0.000945719	163	22183832	0.000734769	115	26358245	0.000436296	157	28730741	0.000546453	147	26223346	0.000560569	7	26962296	2.59622e-05	8	21374961	3.7427e-05	28	20608942	0.000135863	46	20367957	0.000225845	51
K01933 phosphoribosylformylglycinamidine cyclo-ligase [EC:6.3.3.1]	0.0475351	0.00231957	0.0534396	0.00125596	0.000108356	0.00661321	-0.00590447	-0.0081043	-0.00370464	17351	38517452	0.0450471	13423	28642163	0.0468645	11765	26103837	0.04507	12244	27161364	0.0450787	11195	22945505	0.0487895	10667	22183832	0.0480846	13049	26358245	0.0495063	14894	28730741	0.0518399	14099	26223346	0.0537651	14376	26962296	0.0533189	11733	21374961	0.0548913	11337	20608942	0.0550101	10588	20367957	0.0519836	9842
K15268 O-acetylserine/cysteine efflux transporter	0.0132687	0.00255814	0.00665403	0.0011506	0.000108957	0.00661417	0.00661471	0.00424325	0.00898618	5018	38517452	0.0130279	4220	28642163	0.0147335	4262	26103837	0.0163271	4068	27161364	0.0149772	3542	22945505	0.0154366	2878	22183832	0.0129734	2736	26358245	0.0103801	2383	28730741	0.00829425	1440	26223346	0.00549129	1354	26962296	0.00502183	1194	21374961	0.00558598	1249	20608942	0.00606048	1557	20367957	0.00764436	1443
K02020 molybdate transport system substrate-binding protein	0.0244115	0.00189859	0.0190309	0.00188424	0.000107798	0.00661491	0.00538063	0.00321221	0.00754904	9831	38517452	0.0255235	7235	28642163	0.02526	6230	26103837	0.0238662	6374	27161364	0.0234672	6093	22945505	0.0265542	5866	22183832	0.0264427	6286	26358245	0.0238483	5841	28730741	0.0203301	4700	26223346	0.017923	4932	26962296	0.0182922	3647	21374961	0.017062	3874	20608942	0.0187977	4562	20367957	0.0223979	3959
K03585 membrane fusion protein, multidrug efflux system	0.0546939	0.00549859	0.0388433	0.00569398	0.00011303	0.00664698	0.0158506	0.00943315	0.0222681	20097	38517452	0.0521763	15637	28642163	0.0545943	16446	26103837	0.0630022	17561	27161364	0.0646543	11678	22945505	0.0508945	11111	22183832	0.050086	13894	26358245	0.0527122	14202	28730741	0.0494314	9091	26223346	0.0346676	8774	26962296	0.0325417	6611	21374961	0.0309287	7309	20608942	0.0354652	8793	20367957	0.0431708	7649
K02687 ribosomal protein L11 methyltransferase [EC:2.1.1.-]	0.028038	0.00208803	0.022115	0.00210523	0.000115279	0.00667492	0.00592302	0.00351932	0.00832671	10875	38517452	0.028234	7849	28642163	0.0274037	8203	26103837	0.0314245	8294	27161364	0.030536	6434	22945505	0.0280404	6288	22183832	0.028345	6682	26358245	0.0253507	7174	28730741	0.0249698	5317	26223346	0.0202758	5865	26962296	0.0217526	3919	21374961	0.0183345	4274	20608942	0.0207386	4717	20367957	0.0231589	4204
K02463 general secretion pathway protein N	0.000833286	0.000281284	0.000118345	0.000142067	0.0001142	0.00668098	0.00071494	0.000450777	0.000979103	287	38517452	0.000745117	230	28642163	0.000803012	316	26103837	0.00121055	353	27161364	0.00129964	200	22945505	0.00087163	174	22183832	0.000784355	139	26358245	0.000527349	122	28730741	0.000424632	0	26223346	0	0	26962296	0	0	21374961	0	0	20608942	0	63	20367957	0.000309309	10
K03438 16S rRNA (cytosine1402-N4)-methyltransferase [EC:2.1.1.199]	0.0499609	0.00247053	0.0568916	0.00244172	0.000116587	0.00668217	-0.00693066	-0.00974654	-0.00411478	18837	38517452	0.0489051	14564	28642163	0.0508481	12237	26103837	0.0468782	12972	27161364	0.047759	11692	22945505	0.0509555	10995	22183832	0.0495631	12983	26358245	0.0492559	15952	28730741	0.0555224	15033	26223346	0.0573268	15852	26962296	0.0587932	12814	21374961	0.0599486	12333	20608942	0.059843	10722	20367957	0.0526415	10206
K06187 recombination protein RecR	0.033577	0.0012692	0.036807	0.000624968	0.000115044	0.00669568	-0.00322997	-0.00441813	-0.0020418	12738	38517452	0.0330707	9692	28642163	0.0338382	8305	26103837	0.0318152	8566	27161364	0.0315374	7839	22945505	0.0341636	7527	22183832	0.0339301	9249	26358245	0.0350896	10105	28730741	0.0351714	9483	26223346	0.0361624	10060	26962296	0.0373114	7969	21374961	0.0372819	7776	20608942	0.0377312	7563	20367957	0.0371319	6458
K17324 glycerol transport system ATP-binding protein	0.000621448	0.000154079	0.000205197	0.000139613	0.000116548	0.00671401	0.000416251	0.000247544	0.000584958	270	38517452	0.000700981	154	28642163	0.000537669	161	26103837	0.000616768	162	27161364	0.000596435	191	22945505	0.000832407	156	22183832	0.000703215	186	26358245	0.000705662	80	28730741	0.000278447	38	26223346	0.000144909	17	26962296	6.3051e-05	3	21374961	1.40351e-05	33	20608942	0.000160125	100	20367957	0.000490967	50
K17224 S-sulfosulfanyl-L-cysteine sulfohydrolase [EC:3.1.6.20]	0.00248878	0.000749423	0.000595973	0.000387612	0.000118532	0.00675933	0.0018928	0.00118677	0.00259884	995	38517452	0.00258324	706	28642163	0.0024649	1023	26103837	0.00391896	816	27161364	0.00300427	627	22945505	0.00273256	492	22183832	0.00221783	440	26358245	0.00166931	379	28730741	0.00131914	91	26223346	0.000347019	169	26962296	0.000626801	45	21374961	0.000210527	64	20608942	0.000310545	84	20367957	0.000412412	69
K15552 taurine transport system permease protein	0.00208539	0.000318317	0.000954222	0.000445941	0.000119562	0.00678381	0.00113117	0.000682577	0.00157976	817	38517452	0.00212112	549	28642163	0.00191675	739	26103837	0.002831	562	27161364	0.00206912	513	22945505	0.00223573	385	22183832	0.0017355	503	26358245	0.00190832	536	28730741	0.0018656	119	26223346	0.000453794	138	26962296	0.000511826	141	21374961	0.00065965	113	20608942	0.000548306	286	20367957	0.00140417	176
K00043 4-hydroxybutyrate dehydrogenase [EC:1.1.1.61]	0.00313298	0.000808925	0.00101133	0.000283192	0.000123332	0.00679288	0.00212165	0.00138485	0.00285845	1272	38517452	0.0033024	925	28642163	0.0032295	974	26103837	0.00373125	1028	27161364	0.00378479	968	22945505	0.00421869	678	22183832	0.00305628	531	26358245	0.00201455	496	28730741	0.00172637	225	26223346	0.000858014	329	26962296	0.00122022	188	21374961	0.000879534	105	20608942	0.000509488	160	20367957	0.000785548	213
K01873 valyl-tRNA synthetase [EC:6.1.1.9]	0.129877	0.00531301	0.14363	0.00211357	0.000120978	0.00679585	-0.0137527	-0.0186286	-0.00887684	51668	38517452	0.134142	38492	28642163	0.134389	32062	26103837	0.122825	34074	27161364	0.12545	29256	22945505	0.127502	27577	22183832	0.124311	34710	26358245	0.131686	39853	28730741	0.138712	36630	26223346	0.139685	39266	26962296	0.145633	31323	21374961	0.146541	29880	20608942	0.144986	28882	20367957	0.141801	25812
K02663 type IV pilus assembly protein PilN	0.0077994	0.00138343	0.00422961	0.000557845	0.000122359	0.00680568	0.00356979	0.00229898	0.00484061	2962	38517452	0.00769002	2215	28642163	0.00773335	2478	26103837	0.00949286	2525	27161364	0.00929629	1958	22945505	0.00853326	1820	22183832	0.00820417	1681	26358245	0.00637751	1456	28730741	0.00506774	987	26223346	0.00376382	948	26962296	0.00351602	839	21374961	0.00392515	770	20608942	0.00373624	1056	20367957	0.00518461	884
K22445 4,4'-diapolycopenoate synthase [EC:1.2.99.10]	0.00963589	0.00181157	0.00499354	0.00139837	0.000123017	0.00680873	0.00464236	0.00277595	0.00650876	3741	38517452	0.00971248	2573	28642163	0.00898326	3261	26103837	0.0124924	3174	27161364	0.0116857	2464	22945505	0.0107385	2012	22183832	0.00906967	1952	26358245	0.00740565	2011	28730741	0.00699947	1144	26223346	0.00436252	1327	26962296	0.00492169	731	21374961	0.00341989	668	20608942	0.00324131	1076	20367957	0.00528281	799
K01945 phosphoribosylamine---glycine ligase [EC:6.3.4.13]	0.0565463	0.00289641	0.0637546	0.0019476	0.000133937	0.00681209	-0.00720825	-0.0100759	-0.00434056	21067	38517452	0.0546947	15876	28642163	0.0554288	14356	26103837	0.0549957	14744	27161364	0.054283	13142	22945505	0.0572748	12061	22183832	0.0543684	15250	26358245	0.0578567	18235	28730741	0.0634686	16870	26223346	0.064332	17208	26962296	0.0638225	14117	21374961	0.0660446	13852	20608942	0.0672135	12555	20367957	0.0616409	11077
K07323 phospholipid transport system substrate-binding protein	0.00757318	0.00107951	0.00486736	0.000602964	0.000121946	0.00681632	0.00270582	0.00167697	0.00373467	2694	38517452	0.00699423	1900	28642163	0.00663358	2473	26103837	0.0094737	2472	27161364	0.00910116	1782	22945505	0.00776623	1659	22183832	0.00747842	1674	26358245	0.00635095	1950	28730741	0.00678716	1096	26223346	0.00417948	1044	26962296	0.00387207	949	21374961	0.00443977	993	20608942	0.0048183	1112	20367957	0.00545956	996
K02992 small subunit ribosomal protein S7	0.02908	0.00147088	0.0328372	0.000656142	0.000120855	0.00682289	-0.00375724	-0.00511971	-0.00239476	10974	38517452	0.028491	8586	28642163	0.0299768	7158	26103837	0.0274213	7441	27161364	0.0273955	6780	22945505	0.0295483	6278	22183832	0.0282999	7727	26358245	0.0293153	9249	28730741	0.032192	8372	26223346	0.0319258	8920	26962296	0.0330832	6787	21374961	0.0317521	6932	20608942	0.0336359	6788	20367957	0.0333269	6049
K17316 glucose/mannose transport system permease protein	0.00400229	0.000458172	0.00594631	0.000783957	0.000132403	0.00682629	-0.00194402	-0.0026971	-0.00119094	1451	38517452	0.00376712	1119	28642163	0.00390683	1003	26103837	0.00384235	900	27161364	0.00331353	982	22945505	0.00427971	920	22183832	0.00414716	1314	26358245	0.00498516	1085	28730741	0.00377644	1664	26223346	0.00634549	1690	26962296	0.00626801	1408	21374961	0.00658715	1117	20608942	0.00541998	1345	20367957	0.00660351	1222
K05375 MbtH protein	0.000203752	6.03818e-05	5.40077e-05	3.82233e-05	0.000133622	0.00682683	0.000149745	9.08019e-05	0.000208687	53	38517452	0.0001376	47	28642163	0.000164094	76	26103837	0.000291145	71	27161364	0.000261401	62	22945505	0.000270205	38	22183832	0.000171296	56	26358245	0.000212457	35	28730741	0.000121821	14	26223346	5.33875e-05	0	26962296	0	4	21374961	1.87135e-05	9	20608942	4.36704e-05	6	20367957	2.9458e-05	12
K09141 uncharacterized protein	0.0194653	0.00160636	0.0237115	0.00139717	0.000124605	0.00682969	-0.00424624	-0.0059752	-0.00251727	7969	38517452	0.0206893	5693	28642163	0.0198763	4500	26103837	0.0172388	5191	27161364	0.0191117	3981	22945505	0.0173498	4092	22183832	0.0184459	5624	26358245	0.0213368	6227	28730741	0.0216736	5952	26223346	0.0226973	6504	26962296	0.0241226	5078	21374961	0.0237568	5072	20608942	0.0246107	4767	20367957	0.0234044	4815
K03555 DNA mismatch repair protein MutS	0.111601	0.00759801	0.130476	0.0040927	0.000133247	0.00683858	-0.0188748	-0.0260749	-0.0116748	42771	38517452	0.111043	33701	28642163	0.117662	26900	26103837	0.10305	29408	27161364	0.108271	23619	22945505	0.102935	23678	22183832	0.106735	30808	26358245	0.116882	36266	28730741	0.126227	35505	26223346	0.135395	36992	26962296	0.137199	27442	21374961	0.128384	27661	20608942	0.134218	25654	20367957	0.125953	23032
K05560 multicomponent K+	0.000583233	0.000192102	7.77905e-05	6.39492e-05	0.000126007	0.00684011	0.000505442	0.000330874	0.000680011	176	38517452	0.000456936	138	28642163	0.000481807	248	26103837	0.000950052	207	27161364	0.000762112	140	22945505	0.000610141	149	22183832	0.00067166	96	26358245	0.000364212	106	28730741	0.000368943	0	26223346	0	6	26962296	2.22533e-05	23	21374961	0.000107603	0	20608942	0	20	20367957	9.81935e-05	11
K19687 antitoxin VapB	0.00150004	0.000344659	0.000638749	0.000238488	0.000132331	0.00685391	0.000861296	0.000517527	0.00120506	557	38517452	0.0014461	363	28642163	0.00126736	498	26103837	0.00190777	520	27161364	0.00191448	391	22945505	0.00170404	359	22183832	0.0016183	350	26358245	0.00132786	234	28730741	0.000814459	143	26223346	0.000545316	111	26962296	0.000411686	91	21374961	0.000425732	87	20608942	0.000422147	179	20367957	0.000878831	88
K02051 NitT/TauT family transport system substrate-binding protein	0.0492887	0.0033473	0.0408569	0.00163041	0.000125983	0.00687188	0.00843186	0.00530233	0.0115614	20251	38517452	0.0525762	14374	28642163	0.0501848	14085	26103837	0.0539576	14342	27161364	0.0528029	10687	22945505	0.0465756	10559	22183832	0.0475977	12203	26358245	0.0462967	12733	28730741	0.0443184	10515	26223346	0.0400979	10803	26962296	0.0400671	8646	21374961	0.0404492	8466	20608942	0.0410793	8073	20367957	0.0396358	6972
K10576 ubiquitin-conjugating enzyme E2 H [EC:2.3.2.23]	0.00111132	0.000341941	0.000263252	0.000204426	0.00013212	0.0068745	0.000848071	0.000518192	0.00117795	632	38517452	0.00164081	252	28642163	0.000879822	320	26103837	0.00122587	284	27161364	0.0010456	249	22945505	0.00108518	357	22183832	0.00160928	182	26358245	0.000690486	205	28730741	0.000713521	46	26223346	0.000175416	19	26962296	7.04688e-05	12	21374961	5.61405e-05	20	20608942	9.70453e-05	28	20367957	0.000137471	95
K06973 uncharacterized protein	0.00877616	0.00120501	0.0117677	0.00074745	0.000131619	0.00688015	-0.00299151	-0.00416267	-0.00182034	3918	38517452	0.010172	2832	28642163	0.00988752	1858	26103837	0.00711773	2023	27161364	0.00744808	1873	22945505	0.00816282	1735	22183832	0.00782101	2447	26358245	0.00928362	2964	28730741	0.0103165	3003	26223346	0.0114516	3052	26962296	0.0113195	2534	21374961	0.011855	2451	20608942	0.0118929	2511	20367957	0.0123282	2408
K04019 ethanolamine utilization protein EutA	0.00272024	0.000702164	0.000925088	0.00054589	0.000127514	0.00688883	0.00179515	0.00107002	0.00252028	985	38517452	0.00255728	751	28642163	0.00262201	883	26103837	0.00338264	825	27161364	0.0030374	779	22945505	0.003395	764	22183832	0.00344395	510	26358245	0.00193488	399	28730741	0.00138876	141	26223346	0.000537689	146	26962296	0.000541497	112	21374961	0.000523978	118	20608942	0.000572567	406	20367957	0.00199333	306
K01879 glycyl-tRNA synthetase beta chain [EC:6.1.1.14]	0.038264	0.00224942	0.0318557	0.00233562	0.000128326	0.00689966	0.00640827	0.00377923	0.00903731	14021	38517452	0.0364017	10461	28642163	0.0365231	10521	26103837	0.0403044	11137	27161364	0.0410031	9554	22945505	0.0416378	8515	22183832	0.0383838	9492	26358245	0.0360115	10299	28730741	0.0358466	7780	26223346	0.0296682	8331	26962296	0.0308987	6878	21374961	0.0321778	5991	20608942	0.0290699	6746	20367957	0.0331207	5339
K03517 quinolinate synthase [EC:2.5.1.72]	0.0373738	0.00323522	0.0461097	0.00310619	0.000147339	0.00690292	-0.00873592	-0.0123723	-0.00509959	13921	38517452	0.0361421	10700	28642163	0.0373575	9364	26103837	0.0358721	9517	27161364	0.0350387	7800	22945505	0.0339936	7886	22183832	0.0355484	10721	26358245	0.0406742	12746	28730741	0.0443636	11855	26223346	0.0452078	12470	26962296	0.0462498	10271	21374961	0.0480515	9897	20608942	0.0480228	8180	20367957	0.0401611	7682
K01056 peptidyl-tRNA hydrolase, PTH1 family [EC:3.1.1.29]	0.0310802	0.000931398	0.0343612	0.00130752	0.000131598	0.00691104	-0.003281	-0.00459553	-0.00196647	11415	38517452	0.0296359	8788	28642163	0.030682	8005	26103837	0.030666	8167	27161364	0.0300684	7294	22945505	0.0317884	7093	22183832	0.0319737	8244	26358245	0.0312767	9352	28730741	0.0325505	8839	26223346	0.0337066	8890	26962296	0.032972	7945	21374961	0.0371697	7238	20608942	0.0351207	6998	20367957	0.0343579	6288
K01915 glutamine synthetase [EC:6.3.1.2]	0.126243	0.0057248	0.140896	0.0023274	0.000129196	0.00691349	-0.0146532	-0.0199152	-0.0093913	47507	38517452	0.123339	36140	28642163	0.126178	31310	26103837	0.119944	32574	27161364	0.119928	30130	22945505	0.131311	27214	22183832	0.122675	34003	26358245	0.129003	39523	28730741	0.137563	37736	26223346	0.143902	38834	26962296	0.144031	29493	21374961	0.137979	28931	20608942	0.140381	28656	20367957	0.140692	25456
K02292 beta-carotene ketolase (CrtO type)	0.017247	0.0025444	0.0106284	0.000831266	0.000139071	0.00691741	0.00661854	0.00430819	0.00892888	8277	38517452	0.021489	5140	28642163	0.0179456	4561	26103837	0.0174725	5027	27161364	0.0185079	4060	22945505	0.0176941	3792	22183832	0.0170935	4215	26358245	0.0159912	3385	28730741	0.0117818	2509	26223346	0.00956781	2541	26962296	0.00942427	2344	21374961	0.0109661	2162	20608942	0.0104906	2081	20367957	0.010217	1975
K00615 transketolase [EC:2.2.1.1]	0.175141	0.0073245	0.204696	0.0118965	0.000130575	0.00692171	-0.0295557	-0.0411002	-0.0180112	67223	38517452	0.174526	49579	28642163	0.173098	43058	26103837	0.164949	46245	27161364	0.17026	38967	22945505	0.169824	39304	22183832	0.177174	47700	26358245	0.180968	54682	28730741	0.190326	53678	26223346	0.204695	56115	26962296	0.208124	48686	21374961	0.227771	44678	20608942	0.216789	40118	20367957	0.196966	36262
K15371 glutamate dehydrogenase [EC:1.4.1.2]	0.0246441	0.00603444	0.00986384	0.00351831	0.00014714	0.00692234	0.0147803	0.00898602	0.0205745	7102	38517452	0.0184384	5127	28642163	0.0179002	8196	26103837	0.0313977	8191	27161364	0.0301568	7441	22945505	0.032429	5958	22183832	0.0268574	6151	26358245	0.0233362	4780	28730741	0.0166372	1727	26223346	0.00658573	1766	26962296	0.00654989	1377	21374961	0.00644212	1314	20608942	0.00637587	2773	20367957	0.0136145	2003
K05836 GntR family transcriptional regulator, histidine utilization repressor	0.00100128	0.00028838	0.000279735	0.000134334	0.000137435	0.00692761	0.000721548	0.000453267	0.000989828	394	38517452	0.00102291	231	28642163	0.000806503	368	26103837	0.00140975	398	27161364	0.00146532	223	22945505	0.000971868	212	22183832	0.000955651	222	26358245	0.000842241	154	28730741	0.000536011	40	26223346	0.000152536	50	26962296	0.000185444	12	21374961	5.61405e-05	48	20608942	0.000232909	69	20367957	0.000338767	73
K21071 ATP-dependent phosphofructokinase / diphosphate-dependent phosphofructokinase [EC:2.7.1.11 2.7.1.90]	0.0905594	0.00482026	0.105433	0.00570594	0.000130139	0.00693114	-0.0148739	-0.020945	-0.00880292	37022	38517452	0.0961175	28093	28642163	0.0980827	23573	26103837	0.0903047	24745	27161364	0.0911037	19143	22945505	0.0834281	18640	22183832	0.0840252	24301	26358245	0.0921951	25633	28730741	0.089218	28548	26223346	0.108865	29488	26962296	0.109368	24157	21374961	0.113015	22522	20608942	0.109283	21335	20367957	0.104748	18983
K02926 large subunit ribosomal protein L4	0.0355949	0.00151163	0.0393273	0.000852616	0.000138125	0.00693143	-0.00373238	-0.00517543	-0.00228933	13525	38517452	0.035114	10824	28642163	0.0377904	8916	26103837	0.0341559	9367	27161364	0.0344865	7841	22945505	0.0341723	7804	22183832	0.0351788	9354	26358245	0.0354879	11025	28730741	0.0383735	10184	26223346	0.0388356	10824	26962296	0.0401449	8681	21374961	0.0406129	8078	20608942	0.0391966	8152	20367957	0.0400237	6965
K15864 nitrite reductase (NO-forming) / hydroxylamine reductase [EC:1.7.2.1 1.7.99.1]	0.00143035	0.000412311	0.000406343	0.000232698	0.000131446	0.00693531	0.00102401	0.000630362	0.00141765	656	38517452	0.00170312	435	28642163	0.00151874	506	26103837	0.00193841	555	27161364	0.00204334	255	22945505	0.00111133	197	22183832	0.000888034	339	26358245	0.00128613	274	28730741	0.000953682	57	26223346	0.000217364	83	26962296	0.000307837	46	21374961	0.000215205	41	20608942	0.000198943	72	20367957	0.000353496	78
K08641 zinc D-Ala-D-Ala dipeptidase [EC:3.4.13.22]	0.00490081	0.000426416	0.00366373	0.00046376	0.000138861	0.00693753	0.00123708	0.000726032	0.00174813	1771	38517452	0.00459792	1253	28642163	0.00437467	1358	26103837	0.0052023	1317	27161364	0.0048488	1346	22945505	0.00586607	1074	22183832	0.00484136	1237	26358245	0.00469303	1374	28730741	0.00478233	962	26223346	0.00366849	1083	26962296	0.00401672	657	21374961	0.00307369	696	20608942	0.00337717	690	20367957	0.00338767	571
K01822 steroid Delta-isomerase [EC:5.3.3.1]	0.00208669	0.000617194	0.00053147	0.000262106	0.000140218	0.00694387	0.00155522	0.000985992	0.00212445	694	38517452	0.00180178	518	28642163	0.00180852	617	26103837	0.00236364	531	27161364	0.00195498	751	22945505	0.00327297	567	22183832	0.00255592	505	26358245	0.00191591	293	28730741	0.00101981	52	26223346	0.000198297	56	26962296	0.000207697	79	21374961	0.000369591	84	20608942	0.00040759	200	20367957	0.000981935	136
K02519 translation initiation factor IF-2	0.10142	0.00394085	0.111265	0.00294882	0.000147124	0.00695053	-0.00984459	-0.0138646	-0.00582458	38380	38517452	0.0996431	29075	28642163	0.101511	25827	26103837	0.0989395	25998	27161364	0.0957168	23620	22945505	0.10294	22419	22183832	0.10106	26673	26358245	0.101194	31707	28730741	0.110359	28068	26223346	0.107034	29787	26962296	0.110476	24202	21374961	0.113226	23475	20608942	0.113907	23016	20367957	0.113001	20891
K21721 N-[(2S)-2-amino-2-carboxyethyl]-L-glutamate dehydrogenase [EC:1.5.1.51]	0.00215361	0.000241118	0.00133044	0.000328043	0.000137292	0.00695141	0.000823169	0.000490353	0.00115599	906	38517452	0.00235218	653	28642163	0.00227986	486	26103837	0.0018618	581	27161364	0.00213907	553	22945505	0.00241006	533	22183832	0.00240265	544	26358245	0.00206387	494	28730741	0.00171941	381	26223346	0.0014529	193	26962296	0.000715814	239	21374961	0.00111813	210	20608942	0.00101898	363	20367957	0.00178221	265
K14696 solute carrier family 30 (zinc transporter), member 9	0.00219106	0.000515621	0.000922322	0.000259267	0.000149219	0.00696213	0.00126874	0.000784776	0.0017527	852	38517452	0.00221198	402	28642163	0.00140353	735	26103837	0.00281568	786	27161364	0.00289382	494	22945505	0.00215293	413	22183832	0.00186172	683	26358245	0.00259122	459	28730741	0.00159759	216	26223346	0.000823694	230	26962296	0.000853043	261	21374961	0.00122105	177	20608942	0.00085885	161	20367957	0.000790457	78
K18289 itaconate CoA-transferase [EC:2.8.3.- 2.8.3.22]	0.00133627	0.00040537	0.00029816	0.000141931	0.000146925	0.0069703	0.00103811	0.000668879	0.00140734	512	38517452	0.00132927	277	28642163	0.000967106	452	26103837	0.00173155	576	27161364	0.00212066	332	22945505	0.00144691	265	22183832	0.00119456	199	26358245	0.000754982	329	28730741	0.00114511	46	26223346	0.000175416	62	26962296	0.000229951	17	21374961	7.95323e-05	56	20608942	0.000271727	89	20367957	0.000436961	43
K18893 ATP-binding cassette, subfamily B, multidrug efflux pump	0.00296378	0.000852002	0.000873958	0.00053459	0.000146651	0.00698666	0.00208983	0.00125973	0.00291992	1395	38517452	0.00362173	874	28642163	0.00305145	1032	26103837	0.00395344	1009	27161364	0.00371484	798	22945505	0.00347781	568	22183832	0.00256042	410	26358245	0.00155549	510	28730741	0.0017751	167	26223346	0.000636837	176	26962296	0.000652763	128	21374961	0.000598832	70	20608942	0.000339658	130	20367957	0.000638257	100
K09792 uncharacterized protein	0.0054918	0.00104704	0.00289336	0.000507675	0.00014252	0.00699647	0.00259844	0.00162005	0.00357683	2369	38517452	0.00615046	1428	28642163	0.00498566	1783	26103837	0.00683041	1834	27161364	0.00675224	1412	22945505	0.00615371	1063	22183832	0.00479178	1034	26358245	0.00392287	1249	28730741	0.00434726	787	26223346	0.00300114	689	26962296	0.00255542	469	21374961	0.00219416	525	20608942	0.00254744	581	20367957	0.00285252	476
K11004 ATP-binding cassette, subfamily B, bacterial HlyB/CyaB	0.00306181	0.000874578	0.000842238	0.000331835	0.000146511	0.00700958	0.00221957	0.00141943	0.00301971	1220	38517452	0.0031674	885	28642163	0.00308985	1008	26103837	0.0038615	988	27161364	0.00363752	926	22945505	0.00403565	746	22183832	0.00336281	528	26358245	0.00200317	384	28730741	0.00133655	148	26223346	0.000564383	117	26962296	0.000433939	102	21374961	0.000477194	149	20608942	0.000722987	218	20367957	0.00107031	186
K14584 2-hydroxychromene-2-carboxylate isomerase [EC:5.99.1.4]	0.00265971	0.000910355	0.000399465	0.000439849	0.000142354	0.00701888	0.00226024	0.00140992	0.00311057	852	38517452	0.00221198	534	28642163	0.00186438	1130	26103837	0.00432887	970	27161364	0.00357125	764	22945505	0.00332963	525	22183832	0.00236659	397	26358245	0.00150617	603	28730741	0.0020988	81	26223346	0.000308885	34	26962296	0.000126102	7	21374961	3.27486e-05	27	20608942	0.000131011	39	20367957	0.000191477	19
K04759 ferrous iron transport protein B	0.071094	0.00677786	0.0879972	0.0049482	0.000143798	0.00702869	-0.0169032	-0.0237658	-0.0100406	25849	38517452	0.0671098	19546	28642163	0.0682421	17148	26103837	0.0656915	17546	27161364	0.0645991	15850	22945505	0.0690767	15540	22183832	0.070051	20599	26358245	0.0781501	24660	28730741	0.0858314	24285	26223346	0.0926083	25042	26962296	0.0928778	19115	21374961	0.0894271	18439	20608942	0.0894709	15700	20367957	0.0770819	15038
K14742 tRNA threonylcarbamoyladenosine biosynthesis protein TsaB	0.0297666	0.00165606	0.0340392	0.000546438	0.000146328	0.0070306	-0.00427258	-0.00577692	-0.00276824	11412	38517452	0.0296281	7941	28642163	0.0277249	7469	26103837	0.0286127	7927	27161364	0.0291848	6738	22945505	0.0293652	6415	22183832	0.0289175	8273	26358245	0.0313868	9571	28730741	0.0333128	8895	26223346	0.0339202	9348	26962296	0.0346706	7482	21374961	0.0350036	6858	20608942	0.0332768	6958	20367957	0.0341615	6140
K01679 fumarate hydratase, class II [EC:4.2.1.2]	0.0249043	0.00247019	0.0188162	0.00126342	0.000145836	0.00703691	0.00608811	0.00376444	0.00841178	9508	38517452	0.0246849	6711	28642163	0.0234305	7522	26103837	0.0288157	7638	27161364	0.0281208	6068	22945505	0.0264453	5278	22183832	0.0237921	5863	26358245	0.0222435	6235	28730741	0.0217015	5096	26223346	0.0194331	5285	26962296	0.0196014	3930	21374961	0.018386	3829	20608942	0.0185793	3496	20367957	0.0171642	3027
K07743 transcriptional regulator	0.00122994	0.000265001	0.000578461	0.000142095	0.000145582	0.0070548	0.000651479	0.000400528	0.00090243	492	38517452	0.00127734	235	28642163	0.000820469	348	26103837	0.00133314	412	27161364	0.00151686	232	22945505	0.00101109	341	22183832	0.00153716	381	26358245	0.00144547	258	28730741	0.000897993	100	26223346	0.00038134	121	26962296	0.000448775	117	21374961	0.000547369	99	20608942	0.000480374	128	20367957	0.000628438	128
K08478 phosphoglycerate transport regulatory protein PgtC	0.0017856	0.00042024	0.000759838	0.000238052	0.000152034	0.00706425	0.00102576	0.000624295	0.00142723	618	38517452	0.00160447	403	28642163	0.00140702	713	26103837	0.0027314	563	27161364	0.0020728	445	22945505	0.00193938	336	22183832	0.00151462	414	26358245	0.00157067	415	28730741	0.00144445	215	26223346	0.00081988	189	26962296	0.000700979	90	21374961	0.000421053	206	20608942	0.000999566	76	20367957	0.000373135	135
K01254 leukotriene-A4 hydrolase [EC:3.3.2.6]	0.00266119	0.00060073	0.00109062	0.000530592	0.00014537	0.00707487	0.00157058	0.000919907	0.00222125	1407	38517452	0.00365289	741	28642163	0.0025871	834	26103837	0.00319493	769	27161364	0.00283123	673	22945505	0.00293304	514	22183832	0.002317	579	26358245	0.00219666	453	28730741	0.00157671	222	26223346	0.000846574	102	26962296	0.000378306	156	21374961	0.000729826	126	20608942	0.000611385	402	20367957	0.00197369	322
K02275 cytochrome c oxidase subunit II [EC:1.9.3.1]	0.0132237	0.00227314	0.00749732	0.000872213	0.000153331	0.00709534	0.00572641	0.00364529	0.00780753	5321	38517452	0.0138145	3690	28642163	0.0128831	4497	26103837	0.0172274	4219	27161364	0.0155331	3122	22945505	0.0136062	2748	22183832	0.0123874	2670	26358245	0.0101297	2933	28730741	0.0102086	2012	26223346	0.00767255	2028	26962296	0.00752161	1583	21374961	0.00740586	1522	20608942	0.00738514	1494	20367957	0.00733505	1009
K03536 ribonuclease P protein component [EC:3.1.26.5]	0.0157482	0.000661367	0.0181599	0.000984678	0.00015426	0.00710917	-0.00241168	-0.00338632	-0.00143704	6313	38517452	0.01639	4146	28642163	0.0144752	4053	26103837	0.0155265	4229	27161364	0.0155699	3813	22945505	0.0166176	3407	22183832	0.015358	4330	26358245	0.0164275	4488	28730741	0.0156209	4157	26223346	0.0158523	4940	26962296	0.0183219	4129	21374961	0.019317	3884	20608942	0.0188462	3582	20367957	0.0175864	3345
K02967 small subunit ribosomal protein S2	0.044849	0.00153294	0.0491326	0.00160032	0.000158435	0.00712703	-0.00428361	-0.00608038	-0.00248685	17162	38517452	0.0445564	12910	28642163	0.0450734	11675	26103837	0.0447252	11742	27161364	0.0432305	10182	22945505	0.0443747	10000	22183832	0.0450779	11404	26358245	0.0432654	13931	28730741	0.0484881	12710	26223346	0.0484683	12834	26962296	0.0475998	10505	21374961	0.0491463	10755	20608942	0.0521861	9686	20367957	0.0475551	8820
K05879 phosphoenolpyruvate---glycerone phosphotransferase subunit DhaL [EC:2.7.1.121]	0.00579469	0.000760886	0.00394208	0.000466054	0.000155328	0.00712929	0.00185261	0.00111502	0.0025902	2706	38517452	0.00702539	1728	28642163	0.00603306	1657	26103837	0.00634773	1528	27161364	0.00562564	1285	22945505	0.00560023	1258	22183832	0.0056708	1553	26358245	0.00589189	1196	28730741	0.00416279	797	26223346	0.00303928	987	26962296	0.00366067	872	21374961	0.00407954	732	20608942	0.00355186	945	20367957	0.00463964	762
K05592 ATP-dependent RNA helicase DeaD [EC:3.6.4.13]	0.0266152	0.00336671	0.0184851	0.00189874	0.000166466	0.00714665	0.00813008	0.00491619	0.011344	10628	38517452	0.0275927	7790	28642163	0.0271977	7869	26103837	0.030145	7294	27161364	0.0268543	7131	22945505	0.031078	6016	22183832	0.0271188	6017	26358245	0.0228278	5777	28730741	0.0201074	4925	26223346	0.018781	5127	26962296	0.0190154	3416	21374961	0.0159813	3340	20608942	0.0162066	4426	20367957	0.0217302	3728
K00395 adenylylsulfate reductase, subunit B [EC:1.8.99.2]	0.00174208	0.000345134	0.000890419	0.000154176	0.000158263	0.00714777	0.000851658	0.000531917	0.0011714	811	38517452	0.00210554	582	28642163	0.00203197	480	26103837	0.00183881	415	27161364	0.00152791	476	22945505	0.00207448	419	22183832	0.00188876	360	26358245	0.0013658	317	28730741	0.00110335	217	26223346	0.000827507	226	26962296	0.000838208	162	21374961	0.000757896	249	20608942	0.00120821	209	20367957	0.00102612	127
K07151 dolichyl-diphosphooligosaccharide---protein glycosyltransferase [EC:2.4.99.18]	0.0212637	0.00535299	0.0363282	0.00570482	0.000165296	0.00715079	-0.0150645	-0.0214087	-0.00872036	7130	38517452	0.0185111	5660	28642163	0.0197611	3992	26103837	0.0152928	3797	27161364	0.0139794	4839	22945505	0.0210891	6451	22183832	0.0290797	6054	26358245	0.0229681	8455	28730741	0.0294284	9836	26223346	0.0375086	9236	26962296	0.0342552	8333	21374961	0.0389849	7723	20608942	0.037474	8522	20367957	0.0418402	8082
K01689 enolase [EC:4.2.1.11]	0.0741096	0.00365556	0.0829504	0.00198293	0.000165996	0.00715365	-0.00884084	-0.0123087	-0.00537302	28533	38517452	0.0740781	21453	28642163	0.0749001	18179	26103837	0.0696411	18936	27161364	0.0697167	16603	22945505	0.0723584	16394	22183832	0.0739007	20181	26358245	0.0765643	23478	28730741	0.0817173	21739	26223346	0.0828994	21795	26962296	0.0808351	17907	21374961	0.0837756	17890	20608942	0.086807	16666	20367957	0.0818246	15340
K00831 phosphoserine aminotransferase [EC:2.6.1.52]	0.0127308	0.00225868	0.00729793	0.00144075	0.000174935	0.00715649	0.00543286	0.00322429	0.00764143	5139	38517452	0.013342	3365	28642163	0.0117484	3972	26103837	0.0152162	4522	27161364	0.0166486	3100	22945505	0.0135103	2480	22183832	0.0111793	2467	26358245	0.0093595	3115	28730741	0.010842	1732	26223346	0.0066048	1847	26962296	0.00685031	1407	21374961	0.00658247	1603	20608942	0.00777818	1254	20367957	0.00615673	981
K06947 polynucleotide 5'-hydroxyl-kinase GRC3/NOL9 [EC:2.7.1.-]	0.00706683	0.00123945	0.0105073	0.00128131	0.000160427	0.00715959	-0.00344049	-0.00488579	-0.0019952	2534	38517452	0.00657884	1900	28642163	0.00663358	1493	26103837	0.00571947	1451	27161364	0.00534215	1595	22945505	0.00695125	1773	22183832	0.00799231	2481	26358245	0.00941261	2271	28730741	0.00790443	2907	26223346	0.0110855	3150	26962296	0.011683	2596	21374961	0.0121451	2458	20608942	0.0119269	1889	20367957	0.00927437	1808
K11003 hemolysin D	0.0016954	0.000432956	0.00060974	0.000167905	0.000157279	0.00716063	0.00108566	0.000689007	0.00148231	734	38517452	0.00190563	460	28642163	0.00160602	514	26103837	0.00196906	586	27161364	0.00215748	390	22945505	0.00169968	464	22183832	0.00209161	367	26358245	0.00139235	213	28730741	0.000741366	101	26223346	0.000385153	111	26962296	0.000411686	120	21374961	0.000561405	99	20608942	0.000480374	168	20367957	0.000824825	118
K11068 hemolysin III	0.0101632	0.0013522	0.00676807	0.000520624	0.000156723	0.00716422	0.0033951	0.00215686	0.00463334	3414	38517452	0.00886351	2405	28642163	0.00839671	3204	26103837	0.0122741	3182	27161364	0.0117152	2589	22945505	0.0112833	2206	22183832	0.00994418	2617	26358245	0.00992858	2557	28730741	0.00889987	1697	26223346	0.00647133	1726	26962296	0.00640153	1392	21374961	0.00651229	1194	20608942	0.0057936	1495	20367957	0.00733996	1282
K06997 PLP dependent protein	0.0345047	0.00133082	0.0377519	0.000927383	0.000165103	0.0071699	-0.00324714	-0.00457703	-0.00191726	13173	38517452	0.0342001	9773	28642163	0.034121	8710	26103837	0.0333667	9043	27161364	0.0332936	7753	22945505	0.0337888	7606	22183832	0.0342862	9311	26358245	0.0353248	10819	28730741	0.0376565	9837	26223346	0.0375124	10129	26962296	0.0375673	8347	21374961	0.0390504	7778	20608942	0.0377409	7275	20367957	0.0357179	6780
K02946 small subunit ribosomal protein S10	0.0211772	0.00112743	0.0238891	0.000665804	0.000171504	0.00717203	-0.00271196	-0.00379708	-0.00162684	8477	38517452	0.0220082	6469	28642163	0.0225856	5212	26103837	0.0199664	5452	27161364	0.0200726	4748	22945505	0.0206925	4413	22183832	0.0198929	5619	26358245	0.0213178	6574	28730741	0.0228814	6191	26223346	0.0236087	6310	26962296	0.0234031	5139	21374961	0.0240421	4824	20608942	0.0234073	4977	20367957	0.0244354	4578
K07666 two-component system, OmpR family, response regulator QseB	0.00382684	0.00111462	0.00102992	0.000426644	0.000158204	0.0071738	0.00279692	0.00177662	0.00381722	1421	38517452	0.00368924	1012	28642163	0.00353325	1556	26103837	0.00596081	1362	27161364	0.00501448	914	22945505	0.00398335	776	22183832	0.00349804	689	26358245	0.00261398	667	28730741	0.00232156	207	26223346	0.000789373	154	26962296	0.000571168	128	21374961	0.000598832	185	20608942	0.000897669	250	20367957	0.00122742	140
K02834 ribosome-binding factor A	0.0218829	0.000817986	0.0238557	0.000474888	0.000167747	0.00717437	-0.00197278	-0.0027576	-0.00118796	8455	38517452	0.0219511	6346	28642163	0.0221561	5466	26103837	0.0209395	5733	27161364	0.0211072	4906	22945505	0.0213811	4716	22183832	0.0212587	6084	26358245	0.023082	6662	28730741	0.0231877	6120	26223346	0.023338	6253	26962296	0.0231916	5113	21374961	0.0239205	4799	20608942	0.023286	4944	20367957	0.0242734	4402
K17218 sulfide	0.0133473	0.00242142	0.00750495	0.00124461	0.000172903	0.00717738	0.00584235	0.00356305	0.00812165	6216	38517452	0.0161381	4732	28642163	0.0165211	3956	26103837	0.0151549	4051	27161364	0.0149146	2760	22945505	0.0120285	2434	22183832	0.010972	2762	26358245	0.0104787	3037	28730741	0.0105706	1701	26223346	0.00648659	1638	26962296	0.00607515	1440	21374961	0.00673685	1275	20608942	0.00618663	1640	20367957	0.00805186	1421
K02982 small subunit ribosomal protein S3	0.0412174	0.00204916	0.0461455	0.00110471	0.000174203	0.00717854	-0.00492804	-0.00687013	-0.00298595	15827	38517452	0.0410905	12103	28642163	0.0422559	10257	26103837	0.0392931	10749	27161364	0.0395746	9123	22945505	0.0397594	8949	22183832	0.0403402	10911	26358245	0.041395	13225	28730741	0.0460308	12414	26223346	0.0473395	12301	26962296	0.045623	9428	21374961	0.0441077	9796	20608942	0.0475328	9170	20367957	0.0450217	8467
K02594 homocitrate synthase NifV [EC:2.3.3.14]	0.0221996	0.00332513	0.0308025	0.00301155	0.00017491	0.00718147	-0.00860289	-0.012243	-0.00496281	8201	38517452	0.0212916	6334	28642163	0.0221143	4138	26103837	0.0158521	5279	27161364	0.0194357	5469	22945505	0.0238347	5283	22183832	0.0238146	6139	26358245	0.0232906	8034	28730741	0.0279631	7475	26223346	0.0285051	7269	26962296	0.0269599	7198	21374961	0.0336749	7138	20608942	0.0346355	6172	20367957	0.0303025	6327
K06888 uncharacterized protein	0.0661379	0.00360462	0.0570983	0.00294905	0.000171108	0.0071821	0.0090396	0.00525022	0.012829	27066	38517452	0.0702694	19937	28642163	0.0696072	17936	26103837	0.0687102	17601	27161364	0.0648016	14453	22945505	0.0629884	15095	22183832	0.0680451	15518	26358245	0.0588734	18907	28730741	0.0658076	14343	26223346	0.0546955	14902	26962296	0.0552698	12120	21374961	0.0567019	10932	20608942	0.0530449	11949	20367957	0.0586657	10179
K02341 DNA polymerase III subunit delta' [EC:2.7.7.7]	0.0465356	0.00232572	0.0521609	0.00118889	0.000169938	0.0071864	-0.00562531	-0.00781292	-0.0034377	16804	38517452	0.043627	12793	28642163	0.0446649	11791	26103837	0.0451696	12431	27161364	0.0457672	10812	22945505	0.0471203	10461	22183832	0.047156	12377	26358245	0.0469568	14889	28730741	0.0518225	13587	26223346	0.0518126	13409	26962296	0.0497324	11584	21374961	0.0541943	10827	20608942	0.0525354	10498	20367957	0.0515417	9467
K07734 transcriptional regulator	0.00131468	0.000450202	0.000214178	0.000219216	0.000160418	0.00718762	0.0011005	0.000679608	0.0015214	502	38517452	0.00130331	336	28642163	0.0011731	525	26103837	0.0020112	482	27161364	0.00177458	401	22945505	0.00174762	216	22183832	0.000973682	208	26358245	0.000789127	214	28730741	0.000744847	25	26223346	9.53349e-05	4	26962296	1.48355e-05	8	21374961	3.7427e-05	10	20608942	4.85226e-05	32	20367957	0.00015711	43
K08296 phosphohistidine phosphatase [EC:3.1.3.-]	0.0100135	0.00147804	0.00640443	0.00106438	0.000170665	0.00719023	0.00360909	0.00211852	0.00509966	3949	38517452	0.0102525	2911	28642163	0.0101633	3278	26103837	0.0125575	3094	27161364	0.0113912	2424	22945505	0.0105642	2025	22183832	0.00912827	2151	26358245	0.00816063	2267	28730741	0.0078905	1440	26223346	0.00549129	1695	26962296	0.00628656	1390	21374961	0.00650294	1207	20608942	0.00585668	1166	20367957	0.00572468	929
K00832 aromatic-amino-acid transaminase [EC:2.6.1.57]	0.00156125	0.000513738	0.000242637	0.000153869	0.000163719	0.00719283	0.00131861	0.000853604	0.00178361	635	38517452	0.0016486	509	28642163	0.0017771	561	26103837	0.00214911	512	27161364	0.00188503	478	22945505	0.0020832	317	22183832	0.00142897	168	26358245	0.000637372	253	28730741	0.00088059	41	26223346	0.000156349	19	26962296	7.04688e-05	42	21374961	0.000196492	36	20608942	0.000174681	43	20367957	0.000211116	26
K03168 DNA topoisomerase I [EC:5.99.1.2]	0.10811	0.0057148	0.126492	0.00746075	0.00017398	0.00719565	-0.0183812	-0.0260485	-0.0107139	42611	38517452	0.110628	33379	28642163	0.116538	26444	26103837	0.101303	27689	27161364	0.101943	24321	22945505	0.105995	23238	22183832	0.104752	28095	26358245	0.106589	33654	28730741	0.117136	34069	26223346	0.129919	35707	26962296	0.132433	29128	21374961	0.136272	27307	20608942	0.132501	25189	20367957	0.12367	22898
K07107 acyl-CoA thioester hydrolase [EC:3.1.2.-]	0.0249098	0.00211136	0.0197874	0.00108919	0.000165058	0.00719565	0.00512242	0.003134	0.00711084	9816	38517452	0.0254846	7440	28642163	0.0259757	6916	26103837	0.0264942	7301	27161364	0.0268801	5823	22945505	0.0253775	5848	22183832	0.0263615	5705	26358245	0.0216441	6051	28730741	0.0210611	5160	26223346	0.0196771	5347	26962296	0.0198314	3763	21374961	0.0176047	3922	20608942	0.0190306	4296	20367957	0.021092	3495
K14054 protein MpaA	0.00268462	0.000372919	0.00389604	0.000490971	0.000168978	0.00719974	-0.00121142	-0.00171462	-0.000708226	1144	38517452	0.00297008	722	28642163	0.00252076	628	26103837	0.00240578	674	27161364	0.00248147	561	22945505	0.00244492	548	22183832	0.00247027	940	26358245	0.00356625	752	28730741	0.00261741	1208	26223346	0.00460658	1206	26962296	0.00447291	846	21374961	0.0039579	852	20608942	0.00413413	687	20367957	0.00337295	728
K01818 L-fucose/D-arabinose isomerase [EC:5.3.1.25 5.3.1.3]	0.0230134	0.0023957	0.032384	0.00389653	0.000172892	0.0072034	-0.00937062	-0.0131508	-0.00559047	8655	38517452	0.0224703	6546	28642163	0.0228544	5598	26103837	0.0214451	5834	27161364	0.021479	4978	22945505	0.0216949	4592	22183832	0.0206998	7504	26358245	0.0284693	7181	28730741	0.0249941	9769	26223346	0.0372531	9624	26962296	0.0356943	7772	21374961	0.0363603	7279	20608942	0.0353196	5722	20367957	0.0280931	5330
K10212 glycosyl-4,4'-diaponeurosporenoate acyltransferase [EC:2.3.1.-]	0.00306784	0.000788858	0.000992075	0.000733257	0.00016462	0.00720436	0.00207576	0.00120224	0.00294928	1432	38517452	0.0037178	1069	28642163	0.00373226	892	26103837	0.00341712	884	27161364	0.00325462	745	22945505	0.00324682	798	22183832	0.00359721	585	26358245	0.00221942	390	28730741	0.00135743	123	26223346	0.000469048	124	26962296	0.000459901	125	21374961	0.000584796	99	20608942	0.000480374	462	20367957	0.00226827	403
K00368 nitrite reductase (NO-forming) [EC:1.7.2.1]	0.0023719	0.00056677	0.00100513	0.000308293	0.000169843	0.00720938	0.00136677	0.000828879	0.00190466	1206	38517452	0.00313105	728	28642163	0.00254171	751	26103837	0.00287697	831	27161364	0.00305949	470	22945505	0.00204833	377	22183832	0.00169944	517	26358245	0.00196144	476	28730741	0.00165676	328	26223346	0.00125079	354	26962296	0.00131294	171	21374961	0.000800001	121	20608942	0.000587124	158	20367957	0.000775728	118
K19686 ribonuclease VapC [EC:3.1.-.-]	0.00674836	0.000955511	0.00443074	0.000616164	0.000163571	0.00721437	0.00231762	0.00138101	0.00325424	2559	38517452	0.00664374	1707	28642163	0.00595975	1849	26103837	0.00708325	2243	27161364	0.00825805	1652	22945505	0.00719967	1600	22183832	0.00721246	1804	26358245	0.00684416	1375	28730741	0.00478581	1076	26223346	0.00410321	1123	26962296	0.00416508	799	21374961	0.00373802	768	20608942	0.00372654	1125	20367957	0.00552338	763
K03595 GTPase	0.0268679	0.00195339	0.0212551	0.0021515	0.000163311	0.00723117	0.00561288	0.00325509	0.00797067	10790	38517452	0.0280133	8013	28642163	0.0279762	7279	26103837	0.0278848	7621	27161364	0.0280582	6381	22945505	0.0278094	6148	22183832	0.0277139	6650	26358245	0.0252293	6395	28730741	0.0222584	5272	26223346	0.0201042	5402	26962296	0.0200354	4168	21374961	0.0194995	3955	20608942	0.0191907	4081	20367957	0.0200364	3889
K18014 3-aminobutyryl-CoA ammonia-lyase [EC:4.3.1.14]	0.000519727	9.14129e-05	0.000228272	0.000116922	0.000162868	0.00723991	0.000291455	0.000170482	0.000412429	237	38517452	0.000615305	146	28642163	0.000509738	136	26103837	0.000520996	102	27161364	0.000375533	125	22945505	0.000544769	135	22183832	0.000608551	160	26358245	0.000607021	108	28730741	0.000375904	50	26223346	0.00019067	22	26962296	8.15954e-05	30	21374961	0.000140351	27	20608942	0.000131011	36	20367957	0.000176748	57
K02528 16S rRNA (adenine1518-N6/adenine1519-N6)-dimethyltransferase [EC:2.1.1.182]	0.0424196	0.00144878	0.0460967	0.00127644	0.000190019	0.00732256	-0.00367708	-0.00524468	-0.00210948	15890	38517452	0.041254	11935	28642163	0.0416693	10886	26103837	0.0417027	11601	27161364	0.0427114	9799	22945505	0.0427055	9009	22183832	0.0406107	11344	26358245	0.0430378	13120	28730741	0.0456654	12098	26223346	0.0461345	12049	26962296	0.0446883	10234	21374961	0.0478784	9489	20608942	0.0460431	8999	20367957	0.0441821	8505
K00406 cytochrome c oxidase cbb3-type subunit III	0.00589849	0.0014314	0.00209206	0.00140914	0.000189739	0.0073368	0.00380643	0.0021781	0.00543477	2473	38517452	0.00642047	1448	28642163	0.00505548	2315	26103837	0.00886843	1868	27161364	0.00687742	1311	22945505	0.00571354	883	22183832	0.00398038	1192	26358245	0.0045223	1652	28730741	0.00574994	410	26223346	0.00156349	537	26962296	0.00199167	189	21374961	0.000884212	229	20608942	0.00111117	271	20367957	0.00133052	171
K17322 glycerol transport system permease protein	0.000578234	0.000136881	0.000219996	0.000129856	0.000187807	0.00733746	0.000358238	0.000205247	0.000511229	237	38517452	0.000615305	148	28642163	0.000516721	144	26103837	0.000551643	153	27161364	0.0005633	135	22945505	0.000588351	181	22183832	0.00081591	178	26358245	0.000675311	86	28730741	0.000299331	16	26223346	6.10143e-05	59	26962296	0.000218824	6	21374961	2.80702e-05	23	20608942	0.000111602	72	20367957	0.000353496	72
K07129 uncharacterized protein	0.00222419	0.000317159	0.000861033	0.000571102	0.000183908	0.00733746	0.00136315	0.000819365	0.00190694	865	38517452	0.00224574	681	28642163	0.00237761	621	26103837	0.00237896	628	27161364	0.00231211	546	22945505	0.00237955	591	22183832	0.0026641	478	26358245	0.00181347	466	28730741	0.00162196	134	26223346	0.000510995	84	26962296	0.000311546	79	21374961	0.000369591	22	20608942	0.00010675	366	20367957	0.00179694	243
K11216 autoinducer-2 kinase [EC:2.7.1.189]	0.0134052	0.00197106	0.00736884	0.00243384	0.000184653	0.00734127	0.00603639	0.00348719	0.00858558	5879	38517452	0.0152632	4102	28642163	0.0143215	4027	26103837	0.0154269	4240	27161364	0.0156104	2802	22945505	0.0122115	2463	22183832	0.0111027	3487	26358245	0.0132293	2895	28730741	0.0100763	1497	26223346	0.00570865	1467	26962296	0.00544093	1018	21374961	0.00476258	949	20608942	0.0046048	1669	20367957	0.00819424	1534
K19714 3-deoxy-alpha-D-manno-octulosonate 8-oxidase [EC:1.1.3.48]	0.0015334	0.000422512	0.000505855	0.000313927	0.000185366	0.00734373	0.00102755	0.000597483	0.00145761	485	38517452	0.00125917	339	28642163	0.00118357	493	26103837	0.00188861	520	27161364	0.00191448	431	22945505	0.00187836	454	22183832	0.00204654	337	26358245	0.00127854	235	28730741	0.000817939	57	26223346	0.000217364	54	26962296	0.00020028	70	21374961	0.000327486	50	20608942	0.000242613	195	20367957	0.000957386	191
K01838 beta-phosphoglucomutase [EC:5.4.2.6]	0.0195359	0.0028709	0.0265913	0.00107935	0.000187345	0.00734484	-0.00705538	-0.00968047	-0.00443029	6519	38517452	0.0169248	5340	28642163	0.0186438	4570	26103837	0.017507	4993	27161364	0.0183827	4204	22945505	0.0183217	3989	22183832	0.0179816	6009	26358245	0.0227974	7392	28730741	0.0257285	6987	26223346	0.0266442	6888	26962296	0.0255468	5931	21374961	0.0277474	5872	20608942	0.0284925	5237	20367957	0.025712	4925
K01561 haloacetate dehalogenase [EC:3.8.1.3]	0.00481746	0.00102052	0.00236938	0.000476161	0.00019128	0.00734608	0.00244808	0.00149853	0.00339763	1890	38517452	0.00490687	1471	28642163	0.00513579	1683	26103837	0.00644733	1370	27161364	0.00504393	1357	22945505	0.00591401	765	22183832	0.00344846	1133	26358245	0.00429847	961	28730741	0.00334485	610	26223346	0.00232617	718	26962296	0.00266298	565	21374961	0.00264328	486	20608942	0.0023582	324	20367957	0.00159073	312
K02167 TetR/AcrR family transcriptional regulator, transcriptional repressor of bet genes	0.00209261	0.000598316	0.000627897	0.00022998	0.000189403	0.00734896	0.00146471	0.000916875	0.00201254	731	38517452	0.00189784	380	28642163	0.00132672	740	26103837	0.00283483	799	27161364	0.00294168	551	22945505	0.00240134	396	22183832	0.00178508	610	26358245	0.00231427	356	28730741	0.00123909	100	26223346	0.00038134	134	26962296	0.00049699	85	21374961	0.000397662	138	20608942	0.000669612	130	20367957	0.000638257	83
K01887 arginyl-tRNA synthetase [EC:6.1.1.19]	0.0844663	0.00328619	0.092319	0.00179324	0.000182937	0.00735068	-0.00785268	-0.010973	-0.00473238	32465	38517452	0.0842865	24216	28642163	0.0845467	20959	26103837	0.0802909	22033	27161364	0.0811189	19278	22945505	0.0840165	18404	22183832	0.0829613	22955	26358245	0.0870885	26266	28730741	0.0914212	23300	26223346	0.0888521	25238	26962296	0.0936048	20148	21374961	0.0942598	18943	20608942	0.0919164	18557	20367957	0.0911088	17071
K02660 twitching motility protein PilJ	0.0147811	0.00136242	0.011487	0.000970187	0.000183615	0.00735177	0.00329419	0.00192459	0.00466379	5303	38517452	0.0137678	4055	28642163	0.0141575	4364	26103837	0.0167178	4575	27161364	0.0168438	3073	22945505	0.0133926	3086	22183832	0.013911	3574	26358245	0.0135593	4568	28730741	0.0158993	3112	26223346	0.0118673	2913	26962296	0.010804	2405	21374961	0.0112515	2160	20608942	0.0104809	2319	20367957	0.0113855	2369
K15827 formate hydrogenlyase subunit 2	0.000261337	8.66706e-05	4.92243e-05	3.54796e-05	0.000180545	0.00735933	0.000212113	0.000132409	0.000291817	99	38517452	0.000257026	73	28642163	0.000254869	89	26103837	0.000340946	65	27161364	0.000239311	65	22945505	0.00028328	86	22183832	0.00038767	68	26358245	0.000257984	20	28730741	6.96118e-05	19	26223346	7.24545e-05	23	26962296	8.53043e-05	0	21374961	0	8	20608942	3.88181e-05	16	20367957	7.85548e-05	0
K17758 ADP-dependent NAD(P)H-hydrate dehydratase [EC:4.2.1.136]	0.0363767	0.00214649	0.0414874	0.00115712	0.000189123	0.00736342	-0.00511063	-0.00714494	-0.00307631	13434	38517452	0.0348777	10356	28642163	0.0361565	8962	26103837	0.0343321	9484	27161364	0.0349172	8184	22945505	0.0356671	7878	22183832	0.0355123	10116	26358245	0.0383789	11829	28730741	0.0411719	10864	26223346	0.0414287	11302	26962296	0.0419178	9124	21374961	0.0426855	9010	20608942	0.0437189	8164	20367957	0.0400826	7387
K11749 regulator of sigma E protease [EC:3.4.24.-]	0.061511	0.00173187	0.0667694	0.00211789	0.000187301	0.0073687	-0.00525836	-0.00748441	-0.00303232	23864	38517452	0.0619563	17679	28642163	0.0617237	15731	26103837	0.0602632	16693	27161364	0.0614586	13925	22945505	0.0606873	13008	22183832	0.0586373	16420	26358245	0.0622955	18694	28730741	0.0650662	17144	26223346	0.0653769	18393	26962296	0.0682175	14229	21374961	0.0665685	14482	20608942	0.0702705	13145	20367957	0.0645376	11443
K01579 aspartate 1-decarboxylase [EC:4.1.1.11]	0.0121554	0.00162927	0.0160716	0.000798136	0.000182809	0.00737177	-0.00391615	-0.00544045	-0.00239184	4631	38517452	0.0120231	3550	28642163	0.0123943	2795	26103837	0.0107072	2814	27161364	0.0103603	2610	22945505	0.0113748	2500	22183832	0.0112695	3519	26358245	0.0133507	4529	28730741	0.0157636	4177	26223346	0.0159286	4365	26962296	0.0161893	3727	21374961	0.0174363	3515	20608942	0.0170557	3306	20367957	0.0162314	2694
K14387 solute carrier family 5 (high affinity choline transporter), member 7	0.0011672	0.000376133	0.000260621	0.000265711	0.000186975	0.0073816	0.000906579	0.000529308	0.00128385	642	38517452	0.00166678	368	28642163	0.00128482	419	26103837	0.00160513	371	27161364	0.00136591	289	22945505	0.00125951	177	22183832	0.000797878	156	26358245	0.000591845	220	28730741	0.00076573	0	26223346	0	0	26962296	0	6	21374961	2.80702e-05	0	20608942	0	80	20367957	0.000392774	125
K02897 large subunit ribosomal protein L25	0.0347151	0.00158533	0.0385648	0.00115257	0.000181753	0.00738193	-0.00384965	-0.00545285	-0.00224645	13061	38517452	0.0339093	10123	28642163	0.035343	8721	26103837	0.0334089	8727	27161364	0.0321302	7966	22945505	0.034717	7784	22183832	0.0350886	9278	26358245	0.0351996	10896	28730741	0.0379245	10010	26223346	0.0381721	10317	26962296	0.0382645	8749	21374961	0.0409311	7863	20608942	0.0381533	7589	20367957	0.0372595	7182
K07124 uncharacterized protein	0.0402344	0.00718204	0.0219891	0.00203897	0.000182674	0.00739274	0.0182452	0.0117549	0.0247355	15594	38517452	0.0404855	10596	28642163	0.0369944	13226	26103837	0.0506669	13673	27161364	0.0503399	10014	22945505	0.0436425	8275	22183832	0.0373019	8772	26358245	0.0332799	8379	28730741	0.0291639	6068	26223346	0.0231397	6683	26962296	0.0247865	4173	21374961	0.0195228	4439	20608942	0.0215392	4406	20367957	0.021632	3311
K01866 tyrosyl-tRNA synthetase [EC:6.1.1.1]	0.0613126	0.00244858	0.0671193	0.00142399	0.000193225	0.00739559	-0.00580671	-0.00815674	-0.00345668	23555	38517452	0.0611541	17495	28642163	0.0610813	15530	26103837	0.0594932	15984	27161364	0.0588483	13994	22945505	0.060988	13263	22183832	0.0597868	16304	26358245	0.0618554	19334	28730741	0.0672938	17364	26223346	0.0662158	17823	26962296	0.0661034	14293	21374961	0.066868	14361	20608942	0.0696833	13557	20367957	0.0665604	12080
K00001 alcohol dehydrogenase [EC:1.1.1.1]	0.0646394	0.00478429	0.0533147	0.00274015	0.000196299	0.00746268	0.0113247	0.00674549	0.015904	26660	38517452	0.0692154	18833	28642163	0.0657527	18299	26103837	0.0701008	18768	27161364	0.0690981	14838	22945505	0.0646663	12926	22183832	0.0582677	16798	26358245	0.0637296	16171	28730741	0.0562847	14526	26223346	0.0553934	14634	26962296	0.0542758	10768	21374961	0.0503767	9815	20608942	0.047625	11166	20367957	0.0548214	9521
K03417 methylisocitrate lyase [EC:4.1.3.30]	0.00306598	0.000747161	0.00117016	0.000192595	0.000195746	0.0074668	0.00189581	0.00122222	0.00256941	1045	38517452	0.00271306	736	28642163	0.00256964	1165	26103837	0.00446295	1104	27161364	0.0040646	654	22945505	0.00285023	704	22183832	0.00317348	662	26358245	0.00251155	627	28730741	0.00218233	399	26223346	0.00152154	301	26962296	0.00111637	215	21374961	0.00100585	195	20608942	0.000946191	221	20367957	0.00108504	182
K08717 urea transporter	0.000736258	0.000217658	0.000219494	0.00011084	0.000197712	0.00749115	0.000516765	0.000312136	0.000721394	305	38517452	0.000791849	241	28642163	0.000841417	228	26103837	0.000873435	215	27161364	0.000791566	203	22945505	0.000884705	205	22183832	0.000924096	144	26358245	0.000546319	68	28730741	0.00023668	88	26223346	0.000335579	22	26962296	8.15954e-05	38	21374961	0.000177778	34	20608942	0.000164977	66	20367957	0.000324038	28
K01736 chorismate synthase [EC:4.2.3.5]	0.041417	0.00245211	0.0488893	0.00304019	0.000198565	0.00749833	-0.00747231	-0.010652	-0.00429266	15927	38517452	0.0413501	11793	28642163	0.0411736	9891	26103837	0.037891	10693	27161364	0.0393684	9426	22945505	0.0410799	8966	22183832	0.0404168	11486	26358245	0.0435765	13354	28730741	0.0464798	13361	26223346	0.0509508	13786	26962296	0.0511307	11050	21374961	0.051696	10799	20608942	0.0523996	8897	20367957	0.0436814	8648
K18829 antitoxin VapB	0.00946677	0.00106794	0.0120168	0.000742874	0.000199505	0.00750872	-0.00255001	-0.00361669	-0.00148333	4157	38517452	0.0107925	2793	28642163	0.00975136	2144	26103837	0.00821335	2072	27161364	0.00762848	2014	22945505	0.00877732	2185	22183832	0.00984952	2794	26358245	0.0106001	2908	28730741	0.0101216	3264	26223346	0.0124469	3172	26962296	0.0117646	2894	21374961	0.0135392	2399	20608942	0.0116406	2578	20367957	0.0126571	2057
K03101 signal peptidase II [EC:3.4.23.36]	0.0270837	0.0012477	0.030027	0.000713744	0.000201965	0.00757604	-0.00294332	-0.0041373	-0.00174934	9963	38517452	0.0258662	7741	28642163	0.0270266	6821	26103837	0.0261303	6953	27161364	0.0255989	6226	22945505	0.0271339	5950	22183832	0.0268213	7603	26358245	0.0288449	8403	28730741	0.0292474	8042	26223346	0.0306673	8284	26962296	0.0307244	6530	21374961	0.0305498	6259	20608942	0.0303703	5907	20367957	0.0290014	5514
K19338 LysR family transcriptional regulator, nitrogen assimilation regulatory protein	0.00175463	0.000536289	0.000463017	0.000214323	0.000207396	0.00760294	0.00129162	0.000799294	0.00178394	845	38517452	0.00219381	452	28642163	0.00157809	663	26103837	0.00253986	582	27161364	0.00214275	488	22945505	0.00212678	288	22183832	0.00129824	243	26358245	0.000921913	355	28730741	0.00123561	126	26223346	0.000480488	78	26962296	0.000289293	103	21374961	0.000481872	97	20608942	0.000470669	67	20367957	0.000328948	21
K09796 periplasmic copper chaperone A	0.00362778	0.00103536	0.00108368	0.000847047	0.000206119	0.00760552	0.00254409	0.00145567	0.00363252	1472	38517452	0.00382164	862	28642163	0.00300955	1283	26103837	0.00491499	1332	27161364	0.00490402	1049	22945505	0.0045717	698	22183832	0.00314644	501	26358245	0.00190073	791	28730741	0.00275315	177	26223346	0.000674971	220	26962296	0.000815954	119	21374961	0.000556726	76	20608942	0.000368772	142	20367957	0.000697174	88
K12537 membrane fusion protein, protease secretion system	0.000442588	0.000154049	6.62553e-05	5.25533e-05	0.000210888	0.00760748	0.000376333	0.000236192	0.000516474	187	38517452	0.000485494	166	28642163	0.000579565	142	26103837	0.000543981	153	27161364	0.0005633	114	22945505	0.000496829	113	22183832	0.00050938	45	26358245	0.000170725	55	28730741	0.000191433	6	26223346	2.28804e-05	8	26962296	2.96711e-05	11	21374961	5.14621e-05	13	20608942	6.30794e-05	34	20367957	0.000166929	0
K02568 cytochrome c-type protein NapB	6.84327e-05	2.64787e-05	3.2612e-06	8.62833e-06	0.000206858	0.00760792	6.51715e-05	4.1131e-05	8.92119e-05	19	38517452	4.93283e-05	24	28642163	8.37926e-05	19	26103837	7.27862e-05	21	27161364	7.73157e-05	21	22945505	9.15212e-05	24	22183832	0.000108187	6	26358245	2.27633e-05	12	28730741	4.17671e-05	0	26223346	0	0	26962296	0	0	21374961	0	0	20608942	0	0	20367957	0	0
K16703 colanic acid/amylovoran biosynthesis glycosyltransferase [EC:2.4.-.-]	0.0150178	0.00201712	0.0202511	0.00191854	0.000205744	0.00761656	-0.00523328	-0.00749051	-0.00297605	4955	38517452	0.0128643	3291	28642163	0.0114901	4047	26103837	0.0155035	4111	27161364	0.0151355	3912	22945505	0.0170491	3569	22183832	0.0160883	3692	26358245	0.014007	5173	28730741	0.0180051	5260	26223346	0.0200585	4985	26962296	0.0184888	4152	21374961	0.0194246	4154	20608942	0.0201563	4986	20367957	0.0244796	3195
K02558 UDP-N-acetylmuramate	0.00799887	0.00229302	0.00222432	0.000602153	0.000203782	0.00761888	0.00577455	0.00370645	0.00784265	3018	38517452	0.00783541	2094	28642163	0.0073109	3084	26103837	0.0118144	3037	27161364	0.0111813	1844	22945505	0.00803643	1668	22183832	0.00751899	1471	26358245	0.0055808	1354	28730741	0.00471272	390	26223346	0.00148722	402	26962296	0.00149097	382	21374961	0.00178714	372	20608942	0.00180504	624	20367957	0.00306364	490
K00940 nucleoside-diphosphate kinase [EC:2.7.4.6]	0.0252984	0.000906865	0.027667	0.000875058	0.000205387	0.00762837	-0.00236858	-0.0033903	-0.00134687	9585	38517452	0.0248848	6947	28642163	0.0242545	6428	26103837	0.0246247	6892	27161364	0.0253743	5621	22945505	0.0244972	5603	22183832	0.0252571	7027	26358245	0.0266596	7710	28730741	0.0268354	7256	26223346	0.02767	7137	26962296	0.0264703	6251	21374961	0.0292445	5666	20608942	0.0274929	5389	20367957	0.0264582	5074
K02899 large subunit ribosomal protein L27	0.0174403	0.000586072	0.0188196	0.000373248	0.000210831	0.0076298	-0.00137931	-0.00195217	-0.000806438	6694	38517452	0.0173791	5148	28642163	0.0179735	4414	26103837	0.0169094	4566	27161364	0.0168106	3924	22945505	0.0171014	3987	22183832	0.0179725	4453	26358245	0.0168941	5310	28730741	0.0184819	4827	26223346	0.0184073	5011	26962296	0.0185852	3927	21374961	0.018372	4014	20608942	0.019477	3901	20367957	0.0191526	3423
K01889 phenylalanyl-tRNA synthetase alpha chain [EC:6.1.1.20]	0.054259	0.00202824	0.0590203	0.00114623	0.000210462	0.00764094	-0.00476129	-0.00669814	-0.00282444	21004	38517452	0.0545311	15957	28642163	0.0557116	13343	26103837	0.0511151	14031	27161364	0.0516579	12859	22945505	0.0560415	11892	22183832	0.0536066	14215	26358245	0.05393	16514	28730741	0.0574785	15135	26223346	0.0577157	15998	26962296	0.0593347	12687	21374961	0.0593545	12612	20608942	0.0611967	11750	20367957	0.0576887	10841
K01485 cytosine/creatinine deaminase [EC:3.5.4.1 3.5.4.21]	0.00464947	0.000767867	0.00273996	0.000228604	0.000205116	0.00764345	0.00190951	0.00121462	0.00260441	1819	38517452	0.00472253	1436	28642163	0.00501359	1384	26103837	0.0053019	1372	27161364	0.00505129	1242	22945505	0.00541282	1032	22183832	0.00465204	1101	26358245	0.00417706	823	28730741	0.00286453	814	26223346	0.0031041	706	26962296	0.00261847	622	21374961	0.00290995	517	20608942	0.00250862	616	20367957	0.00302436	484
K00240 succinate dehydrogenase / fumarate reductase, iron-sulfur subunit [EC:1.3.5.1 1.3.5.4]	0.0257437	0.00229101	0.0203156	0.00107985	0.000209388	0.00765114	0.00542811	0.0032941	0.00756213	11193	38517452	0.0290596	8175	28642163	0.0285418	6403	26103837	0.024529	7080	27161364	0.0260664	6194	22945505	0.0269944	5630	22183832	0.0253788	6188	26358245	0.0234765	6293	28730741	0.0219034	5119	26223346	0.0195208	5546	26962296	0.0205695	4003	21374961	0.0187275	3920	20608942	0.0190209	4288	20367957	0.0210527	3672
K07403 membrane-bound serine protease (ClpP class)	0.0610049	0.00616535	0.0757683	0.00256291	0.000210255	0.00765804	-0.0147634	-0.0204398	-0.0090869	22024	38517452	0.0571793	16784	28642163	0.0585989	13952	26103837	0.0534481	15040	27161364	0.0553728	13647	22945505	0.0594757	13883	22183832	0.0625816	18347	26358245	0.0696063	20622	28730741	0.0717768	19416	26223346	0.0740409	19947	26962296	0.0739811	16623	21374961	0.0777686	16550	20608942	0.0803049	14885	20367957	0.0730805	14212
K02939 large subunit ribosomal protein L9	0.028185	0.00122458	0.0311983	0.000378328	0.000215223	0.00769015	-0.0030133	-0.00412287	-0.00190372	10581	38517452	0.0274707	8092	28642163	0.0282521	6923	26103837	0.026521	7287	27161364	0.0268285	6658	22945505	0.0290166	6271	22183832	0.0282683	7504	26358245	0.0284693	8807	28730741	0.0306536	8058	26223346	0.0307283	8497	26962296	0.0315144	6689	21374961	0.0312936	6425	20608942	0.0311758	6379	20367957	0.0313188	5587
K19956 L-sorbose 1-phosphate reductase [EC:1.1.1.-]	0.0118978	0.00220716	0.0186333	0.0027739	0.000214733	0.00769697	-0.00673554	-0.00962287	-0.00384821	4969	38517452	0.0129006	3716	28642163	0.0129739	2505	26103837	0.00959629	2553	27161364	0.00939938	2289	22945505	0.00997581	2305	22183832	0.0103905	4063	26358245	0.0154145	4175	28730741	0.0145315	5624	26223346	0.0214465	5902	26962296	0.0218898	4331	21374961	0.020262	4435	20608942	0.0215198	2968	20367957	0.0145719	2843
K15539 cytoskeleton protein RodZ	0.0228941	0.00123244	0.0185415	0.00184647	0.000214531	0.00771423	0.0043526	0.00252779	0.0061774	8550	38517452	0.0221977	6790	28642163	0.0237063	6101	26103837	0.023372	6507	27161364	0.0239568	4878	22945505	0.0212591	5454	22183832	0.0245855	6112	26358245	0.0231882	6001	28730741	0.020887	4521	26223346	0.0172404	4800	26962296	0.0178026	3696	21374961	0.0172913	3126	20608942	0.0151682	3968	20367957	0.0194816	3722
K02871 large subunit ribosomal protein L13	0.0266001	0.000905172	0.0287515	0.000658482	0.000220087	0.0077174	-0.0021514	-0.00306694	-0.00123586	10071	38517452	0.0261466	7768	28642163	0.0271209	6734	26103837	0.025797	6826	27161364	0.0251313	6031	22945505	0.026284	6021	22183832	0.0271414	7093	26358245	0.02691	8122	28730741	0.0282694	7221	26223346	0.0275365	7761	26962296	0.0287846	6172	21374961	0.0288749	5892	20608942	0.0285895	6036	20367957	0.0296348	5202
K02837 peptide chain release factor 3	0.00739988	0.00209955	0.00233298	0.000761638	0.000219875	0.00773399	0.00506689	0.00315102	0.00698277	2518	38517452	0.0065373	1596	28642163	0.0055722	2693	26103837	0.0103165	2479	27161364	0.00912693	2228	22945505	0.00970996	1686	22183832	0.00760013	1751	26358245	0.00664308	1061	28730741	0.00369291	445	26223346	0.00169696	415	26962296	0.00153919	362	21374961	0.00169357	350	20608942	0.00169829	581	20367957	0.00285252	430
K00673 arginine N-succinyltransferase [EC:2.3.1.109]	0.00170062	0.000576486	0.000262976	0.000151327	0.000217839	0.00773464	0.00143764	0.000917708	0.00195758	296	38517452	0.000768483	434	28642163	0.00151525	696	26103837	0.00266627	624	27161364	0.00229738	392	22945505	0.0017084	374	22183832	0.00168591	504	26358245	0.00191212	302	28730741	0.00105114	21	26223346	8.00813e-05	38	26962296	0.000140938	44	21374961	0.000205848	31	20608942	0.00015042	61	20367957	0.00029949	40
K07452 5-methylcytosine-specific restriction enzyme B [EC:3.1.21.-]	0.00408868	0.000988772	0.00170247	0.000364675	0.000217172	0.00773528	0.00238621	0.00148311	0.00328931	1754	38517452	0.00455378	1029	28642163	0.00359261	1050	26103837	0.0040224	1261	27161364	0.00464262	1141	22945505	0.00497265	1128	22183832	0.00508478	1067	26358245	0.00404807	515	28730741	0.00179251	396	26223346	0.0015101	613	26962296	0.00227355	282	21374961	0.0013193	227	20608942	0.00110146	373	20367957	0.00183131	360
K01602 ribulose-bisphosphate carboxylase small chain [EC:4.1.1.39]	0.00121617	0.000385041	0.000303865	0.000169479	0.000218732	0.00774202	0.000912305	0.000556083	0.00126853	441	38517452	0.00114494	329	28642163	0.00114866	342	26103837	0.00131015	319	27161364	0.00117446	446	22945505	0.00194374	348	22183832	0.00156871	215	26358245	0.000815684	179	28730741	0.000623026	38	26223346	0.000144909	49	26962296	0.000181735	44	21374961	0.000205848	29	20608942	0.000140716	132	20367957	0.000648077	54
K13688 cyclic beta-1,2-glucan synthetase [EC:2.4.1.-]	0.153609	0.0132304	0.122321	0.009298	0.000219691	0.00775166	0.0312882	0.0180366	0.0445397	64315	38517452	0.166976	47154	28642163	0.164631	43920	26103837	0.168251	44355	27161364	0.163302	34396	22945505	0.149903	32579	22183832	0.146859	35561	26358245	0.134914	38510	28730741	0.134038	31695	26223346	0.120866	33145	26962296	0.122931	22584	21374961	0.105656	23143	20608942	0.112296	27322	20367957	0.134142	24170
K18302 membrane fusion protein, multidrug efflux system	0.00259363	0.000558784	0.00120182	0.00049241	0.000225895	0.00779995	0.00139182	0.000787154	0.00199648	1233	38517452	0.00320115	885	28642163	0.00308985	856	26103837	0.00327921	662	27161364	0.00243729	580	22945505	0.00252773	416	22183832	0.00187524	439	26358245	0.00166551	768	28730741	0.00267309	148	26223346	0.000564383	343	26962296	0.00127215	153	21374961	0.000715791	162	20608942	0.000786067	229	20367957	0.00112432	229
K03457 nucleobase	0.0174816	0.0015863	0.0225043	0.00210583	0.000225758	0.00781913	-0.00502266	-0.00717527	-0.00287004	6324	38517452	0.0164185	4571	28642163	0.015959	4659	26103837	0.017848	4930	27161364	0.0181508	3978	22945505	0.0173367	3534	22183832	0.0159305	5576	26358245	0.0211547	4900	28730741	0.0170549	6038	26223346	0.0230253	5974	26962296	0.0221569	4646	21374961	0.0217357	4402	20608942	0.0213597	5001	20367957	0.0245533	4834
K07663 two-component system, OmpR family, catabolic regulation response regulator CreB	0.00131476	0.000303334	0.000510766	0.000307914	0.000225295	0.00782709	0.000803989	0.000453593	0.00115438	456	38517452	0.00118388	267	28642163	0.000932192	410	26103837	0.00157065	418	27161364	0.00153895	431	22945505	0.00187836	214	22183832	0.000964667	319	26358245	0.00121025	356	28730741	0.00123909	96	26223346	0.000366086	186	26962296	0.000689852	33	21374961	0.000154386	49	20608942	0.000237761	111	20367957	0.000544974	33
K02343 DNA polymerase III subunit gamma/tau [EC:2.7.7.7]	0.0749585	0.0036503	0.0836674	0.00274959	0.000225168	0.00784682	-0.00870888	-0.0124402	-0.00497754	26833	38517452	0.0696645	20550	28642163	0.0717474	18723	26103837	0.0717251	20095	27161364	0.0739838	18196	22945505	0.0793009	16595	22183832	0.0748067	20641	26358245	0.0783095	23022	28730741	0.0801302	20458	26223346	0.0780145	22019	26962296	0.0816659	18521	21374961	0.0866481	16913	20608942	0.0820663	17628	20367957	0.0865477	15423
K00412 ubiquinol-cytochrome c reductase cytochrome b subunit	0.0162788	0.00338003	0.0082235	0.00255449	0.000228702	0.00784886	0.00805531	0.00459662	0.011514	7055	38517452	0.0183164	4655	28642163	0.0162523	5669	26103837	0.0217171	5495	27161364	0.0202309	3483	22945505	0.0151794	3271	22183832	0.014745	3176	26358245	0.0120494	3373	28730741	0.01174	1947	26223346	0.00742468	1983	26962296	0.00735471	1124	21374961	0.00525849	1040	20608942	0.00504635	1764	20367957	0.00866066	1395
K06140 regulator of nucleoside diphosphate kinase	0.000592884	0.00030644	0.00131254	0.000210906	0.00022805	0.00785036	-0.000719656	-0.00102487	-0.000414441	300	38517452	0.000778868	162	28642163	0.0005656	115	26103837	0.000440548	89	27161364	0.000327671	83	22945505	0.000361727	98	22183832	0.000441763	132	26358245	0.000500792	381	28730741	0.00132611	298	26223346	0.00113639	419	26962296	0.00155402	312	21374961	0.00145965	289	20608942	0.0014023	279	20367957	0.0013698	151
K08987 putative membrane protein	0.000356585	0.000109953	0.000100326	5.93692e-05	0.000224915	0.00786228	0.000256259	0.000152026	0.000360492	107	38517452	0.000277796	113	28642163	0.000394523	99	26103837	0.000379255	108	27161364	0.000397624	129	22945505	0.000562202	91	22183832	0.000410209	65	26358245	0.000246602	53	28730741	0.000184471	10	26223346	3.8134e-05	36	26962296	0.00013352	6	21374961	2.80702e-05	14	20608942	6.79317e-05	38	20367957	0.000186568	18
K08764 sterol carrier protein 2 [EC:2.3.1.176]	0.00480862	0.000513373	0.00297907	0.000785662	0.000234449	0.0080217	0.00182955	0.00105707	0.00260204	1877	38517452	0.00487312	1387	28642163	0.00484251	1248	26103837	0.00478091	1518	27161364	0.00558882	1066	22945505	0.00464579	1065	22183832	0.00480079	1385	26358245	0.00525452	1058	28730741	0.00368247	519	26223346	0.00197915	962	26962296	0.00356795	897	21374961	0.0041965	391	20608942	0.00189723	481	20367957	0.00236155	536
K11212 LPPG	0.00627114	0.000607071	0.00365322	0.000621089	1.42493e-06	0.00804446	0.00261792	0.00191384	0.003322	2651	38517452	0.00688259	1767	28642163	0.00616923	1682	26103837	0.0064435	1771	27161364	0.00652029	1481	22945505	0.00645442	1334	22183832	0.00601339	1804	26358245	0.00684416	1391	28730741	0.0048415	960	26223346	0.00366086	961	26962296	0.00356424	611	21374961	0.00285848	595	20608942	0.0028871	733	20367957	0.00359879	674
K16011 mannose-1-phosphate guanylyltransferase / mannose-6-phosphate isomerase [EC:2.7.7.13 5.3.1.8]	0.0148332	0.0018364	0.0104525	0.00141704	0.000235855	0.00804542	0.0043807	0.00248894	0.00627247	6272	38517452	0.0162835	4160	28642163	0.014524	3803	26103837	0.0145687	4004	27161364	0.0147415	3808	22945505	0.0165958	3735	22183832	0.0168366	2809	26358245	0.010657	4154	28730741	0.0144584	2662	26223346	0.0101513	2728	26962296	0.0101178	2315	21374961	0.0108304	2154	20608942	0.0104518	1842	20367957	0.00904362	1478
K01969 3-methylcrotonyl-CoA carboxylase beta subunit [EC:6.4.1.4]	0.0163222	0.00303951	0.00887682	0.00260529	0.000241088	0.00812576	0.00744535	0.00419295	0.0106978	4962	38517452	0.0128825	3789	28642163	0.0132287	5257	26103837	0.0201388	5457	27161364	0.020091	4522	22945505	0.0197076	3399	22183832	0.015322	4281	26358245	0.0162416	3725	28730741	0.0129652	1804	26223346	0.00687937	1971	26962296	0.00731021	1387	21374961	0.0064889	1166	20608942	0.00565774	1965	20367957	0.00964751	1699
K00604 methionyl-tRNA formyltransferase [EC:2.1.2.9]	0.0602039	0.00233213	0.0679537	0.00331053	0.000240768	0.00813924	-0.00774983	-0.0110678	-0.00443184	22344	38517452	0.0580101	17146	28642163	0.0598628	14780	26103837	0.05662	15932	27161364	0.0586568	13876	22945505	0.0604737	13788	22183832	0.0621534	16185	26358245	0.0614039	18517	28730741	0.0644501	17719	26223346	0.0675696	17984	26962296	0.0667006	14831	21374961	0.0693849	14210	20608942	0.0689507	15010	20367957	0.0736942	12750
K20906 2-hydroxyisobutanoyl-CoA mutase large subunit [EC:5.4.99.64]	0.000715054	0.000243798	0.000126704	7.82151e-05	0.000240281	0.0081472	0.00058835	0.000367139	0.000809561	217	38517452	0.000563381	197	28642163	0.000687797	248	26103837	0.000950052	223	27161364	0.000821019	254	22945505	0.00110697	179	22183832	0.000806894	126	26358245	0.000478029	88	28730741	0.000306292	26	26223346	9.91483e-05	16	26962296	5.93421e-05	3	21374961	1.40351e-05	35	20608942	0.000169829	14	20367957	6.87354e-05	50
K21467 penicillin-binding protein 3	0.000123758	0.00010571	0.000477413	0.000151645	0.000245708	0.00815966	-0.000353654	-0.000505206	-0.000202103	47	38517452	0.000122023	81	28642163	0.0002828	62	26103837	0.000237513	6	27161364	2.20902e-05	8	22945505	3.48652e-05	12	22183832	5.40934e-05	0	26358245	0	68	28730741	0.00023668	164	26223346	0.000625397	139	26962296	0.000515535	142	21374961	0.000664329	136	20608942	0.000659908	50	20367957	0.000245484	59
K04691 serine protease DegS [EC:3.4.21.-]	0.00459238	0.000838788	0.00258893	0.000662836	0.000245117	0.00816405	0.00200345	0.00113243	0.00287446	1422	38517452	0.00369183	1164	28642163	0.00406394	1610	26103837	0.00616768	1406	27161364	0.00517647	1145	22945505	0.00499008	1023	22183832	0.00461147	1236	26358245	0.00468923	962	28730741	0.00334833	372	26223346	0.00141858	589	26962296	0.00218453	512	21374961	0.00239533	462	20608942	0.00224175	700	20367957	0.00343677	550
K18382 NAD+-dependent secondary alcohol dehydrogenase Adh1 [EC:1.1.1.-]	0.000262633	6.14696e-05	0.000120267	3.86698e-05	0.000240143	0.00816704	0.000142366	8.24427e-05	0.000202289	78	38517452	0.000202506	54	28642163	0.000188533	60	26103837	0.000229851	95	27161364	0.000349762	76	22945505	0.00033122	71	22183832	0.000320053	74	26358245	0.000280747	57	28730741	0.000198394	44	26223346	0.000167789	22	26962296	8.15954e-05	18	21374961	8.42107e-05	18	20608942	8.73407e-05	37	20367957	0.000181658	28
K01808 ribose 5-phosphate isomerase B [EC:5.3.1.6]	0.0319739	0.00105359	0.0356088	0.00156594	0.000246714	0.00816906	-0.00363487	-0.00518551	-0.00208422	12661	38517452	0.0328708	9507	28642163	0.0331923	7925	26103837	0.0303595	8287	27161364	0.0305102	7175	22945505	0.0312697	7169	22183832	0.0323163	8713	26358245	0.0330561	9256	28730741	0.0322164	9560	26223346	0.0364561	9714	26962296	0.0360281	7828	21374961	0.0366223	7234	20608942	0.0351013	7579	20367957	0.0372104	6710
K01425 glutaminase [EC:3.5.1.2]	0.0103484	0.00260232	0.00419078	0.00197081	0.000244583	0.00817038	0.00615767	0.00349304	0.0088223	3604	38517452	0.0093568	2371	28642163	0.00827801	4123	26103837	0.0157946	3519	27161364	0.0129559	2576	22945505	0.0112266	1927	22183832	0.00868651	2127	26358245	0.00806958	2419	28730741	0.00841955	790	26223346	0.00301258	650	26962296	0.00241077	441	21374961	0.00206316	513	20608942	0.00248921	919	20367957	0.00451199	814
K03319 divalent anion	0.00407953	0.000881351	0.00202515	0.000399418	0.000243205	0.00817269	0.00205438	0.00123674	0.00287202	1380	38517452	0.00358279	1106	28642163	0.00386144	1365	26103837	0.00522912	1339	27161364	0.0049298	1109	22945505	0.00483319	953	22183832	0.00429592	936	26358245	0.00355107	676	28730741	0.00235288	404	26223346	0.00154061	472	26962296	0.00175059	401	21374961	0.00187603	366	20608942	0.00177593	588	20367957	0.00288689	343
K20907 2-hydroxyisobutanoyl-CoA mutase small subunit [EC:5.4.99.64]	0.000198389	6.66267e-05	4.47197e-05	3.63087e-05	0.000244259	0.00818376	0.000153669	9.04194e-05	0.00021692	75	38517452	0.000194717	28	28642163	9.7758e-05	69	26103837	0.000264329	60	27161364	0.000220902	69	22945505	0.000300712	53	22183832	0.000238913	39	26358245	0.000147961	35	28730741	0.000121821	0	26223346	0	0	26962296	0	5	21374961	2.33919e-05	21	20608942	0.000101898	8	20367957	3.92774e-05	17
K11069 spermidine/putrescine transport system substrate-binding protein	0.015002	0.00233235	0.00957358	0.00162317	0.000249544	0.00823859	0.00542843	0.00309854	0.00775832	5829	38517452	0.0151334	4082	28642163	0.0142517	4760	26103837	0.0182349	4692	27161364	0.0172745	4006	22945505	0.0174588	3045	22183832	0.0137262	2946	26358245	0.0111768	3666	28730741	0.0127599	2243	26223346	0.00855345	2238	26962296	0.00830048	1766	21374961	0.008262	1482	20608942	0.00719105	2208	20367957	0.0108406	1817
K14727 3-oxoadipate enol-lactonase / 4-carboxymuconolactone decarboxylase [EC:3.1.1.24 4.1.1.44]	0.00946652	0.00222046	0.00434854	0.00142334	0.000252652	0.00829273	0.00511797	0.00294438	0.00729157	2920	38517452	0.00758098	1783	28642163	0.00622509	3146	26103837	0.0120519	2949	27161364	0.0108573	2904	22945505	0.0126561	2332	22183832	0.0105122	2249	26358245	0.00853243	2102	28730741	0.00731621	788	26223346	0.00300496	752	26962296	0.00278908	634	21374961	0.00296609	622	20608942	0.00301811	1273	20367957	0.00625001	1047
K05776 molybdate transport system ATP-binding protein	0.0040694	0.000628902	0.0026255	0.000361655	0.00025255	0.00831354	0.00144391	0.000841529	0.00204628	1534	38517452	0.00398261	1107	28642163	0.00386493	1266	26103837	0.00484986	1294	27161364	0.00476412	989	22945505	0.00431021	957	22183832	0.00431395	986	26358245	0.00374076	784	28730741	0.00272878	573	26223346	0.00218508	636	26962296	0.00235885	489	21374961	0.00228772	619	20608942	0.00300355	640	20367957	0.00314219	534
K02821 PTS system, ascorbate-specific IIA component [EC:2.7.1.194]	0.00123035	0.000372937	0.000338244	0.000119566	0.000255666	0.00834313	0.000892105	0.000553728	0.00123048	524	38517452	0.00136042	283	28642163	0.000988054	464	26103837	0.00177752	423	27161364	0.00155736	357	22945505	0.00155586	257	22183832	0.0011585	202	26358245	0.000766364	195	28730741	0.000678716	68	26223346	0.000259311	69	26962296	0.000255913	65	21374961	0.000304094	32	20608942	0.000155272	115	20367957	0.000564612	61
K02613 ring-1,2-phenylacetyl-CoA epoxidase subunit PaaE	0.00207414	0.000649922	0.000582476	0.000344692	0.000255558	0.00836379	0.00149166	0.000877196	0.00210613	790	38517452	0.00205102	626	28642163	0.00218559	657	26103837	0.00251687	759	27161364	0.00279441	627	22945505	0.00273256	484	22183832	0.00218177	358	26358245	0.00135821	222	28730741	0.000772692	44	26223346	0.000167789	135	26962296	0.000500699	74	21374961	0.000346199	42	20608942	0.000203795	263	20367957	0.00129124	147
K14986 two-component system, LuxR family, sensor kinase FixL [EC:2.7.13.3]	0.0311992	0.0041411	0.0210577	0.00364856	0.000263201	0.00839493	0.0101414	0.00566067	0.0146222	11474	38517452	0.0297891	8888	28642163	0.0310312	9656	26103837	0.0369907	10562	27161364	0.0388861	6384	22945505	0.0278224	6035	22183832	0.0272045	7213	26358245	0.0273653	8764	28730741	0.0305039	4620	26223346	0.0176179	5069	26962296	0.0188003	3597	21374961	0.0168281	3944	20608942	0.0191373	5217	20367957	0.0256138	3445
K02575 MFS transporter, NNP family, nitrate/nitrite transporter	0.0143683	0.0021728	0.00902105	0.000477903	0.000260287	0.00839686	0.0053472	0.00339379	0.00730061	5910	38517452	0.0153437	4291	28642163	0.0149814	4042	26103837	0.0154843	4438	27161364	0.0163394	3646	22945505	0.0158898	3379	22183832	0.0152318	2517	26358245	0.00954919	3484	28730741	0.0121264	2170	26223346	0.00827507	2520	26962296	0.00934639	2045	21374961	0.00956727	1934	20608942	0.00938428	1673	20367957	0.00821388	1616
K06208 chorismate mutase [EC:5.4.99.5]	0.00543118	0.000921174	0.00796846	0.00103017	0.000262613	0.00839989	-0.00253728	-0.00365887	-0.00141568	2264	38517452	0.00587786	1512	28642163	0.00527893	1098	26103837	0.00420628	995	27161364	0.00366329	1366	22945505	0.00595324	1312	22183832	0.00591422	1659	26358245	0.00629405	1799	28730741	0.00626159	1962	26223346	0.00748188	2019	26962296	0.00748823	1729	21374961	0.0080889	1520	20608942	0.00737544	1958	20367957	0.00961314	1753
K17204 erythritol transport system ATP-binding protein	0.000321154	9.2649e-05	0.000749962	0.000186559	0.000258362	0.00840682	-0.000428807	-0.000603637	-0.000253977	108	38517452	0.000280392	83	28642163	0.000289783	118	26103837	0.000452041	114	27161364	0.000419714	55	22945505	0.000239698	44	22183832	0.000198343	67	26358245	0.00025419	125	28730741	0.000435074	286	26223346	0.00109063	242	26962296	0.00089755	125	21374961	0.000584796	118	20608942	0.000572567	189	20367957	0.000927928	98
K09138 uncharacterized protein	0.0125833	0.00159582	0.0162692	0.00109382	0.000262185	0.00841003	-0.00368586	-0.0052736	-0.00209812	4960	38517452	0.0128773	3936	28642163	0.013742	2633	26103837	0.0100866	2973	27161364	0.0109457	2640	22945505	0.0115055	2707	22183832	0.0122026	3790	26358245	0.0143788	4289	28730741	0.0149283	4403	26223346	0.0167904	4878	26962296	0.0180919	3719	21374961	0.0173989	3402	20608942	0.0165074	3194	20367957	0.0156815	2884
K06139 PqqA peptide cyclase [EC:1.21.98.4]	0.015792	0.00137891	0.0121488	0.00143309	0.000259962	0.00841042	0.00364313	0.00203071	0.00525555	6306	38517452	0.0163718	4681	28642163	0.016343	4080	26103837	0.0156299	5001	27161364	0.0184122	3054	22945505	0.0133098	3548	22183832	0.0159936	4137	26358245	0.0156953	4189	28730741	0.0145802	3266	26223346	0.0124546	3518	26962296	0.0130479	2156	21374961	0.0100866	2214	20608942	0.0107429	2320	20367957	0.0113904	2023
K07112 uncharacterized protein	0.0330665	0.00413675	0.0231965	0.00333612	0.000259292	0.00841283	0.00987	0.00554369	0.0141963	14031	38517452	0.0364276	10241	28642163	0.035755	8694	26103837	0.0333054	8789	27161364	0.0323585	8386	22945505	0.0365475	8091	22183832	0.0364725	7827	26358245	0.0296947	6887	28730741	0.0239708	5278	26223346	0.0201271	5537	26962296	0.0205361	4622	21374961	0.0216234	4629	20608942	0.0224611	6058	20367957	0.0297428	5026
K03977 GTPase	0.0656956	0.00263523	0.0719034	0.000954072	0.000262064	0.0084301	-0.00620778	-0.00861222	-0.00380335	25734	38517452	0.0668113	18870	28642163	0.0658819	15923	26103837	0.0609987	17121	27161364	0.0630344	15136	22945505	0.065965	14361	22183832	0.0647363	17986	26358245	0.0682367	20083	28730741	0.0699007	18947	26223346	0.0722524	19801	26962296	0.0734396	15308	21374961	0.0716165	14519	20608942	0.07045	14807	20367957	0.0726975	12847
K00680 uncharacterized N-acetyltransferase [EC:2.3.1.-]	0.000573436	0.000195037	0.000117586	7.10104e-05	0.000276157	0.00845012	0.000455851	0.000277841	0.000633861	379	38517452	0.00098397	187	28642163	0.000652884	149	26103837	0.000570797	146	27161364	0.000537528	128	22945505	0.000557843	136	22183832	0.000613059	110	26358245	0.000417327	73	28730741	0.000254083	50	26223346	0.00019067	37	26962296	0.000137229	8	21374961	3.7427e-05	5	20608942	2.42613e-05	7	20367957	3.43677e-05	36
K02356 elongation factor P	0.0356185	0.00121627	0.0383939	0.000667648	0.000265906	0.00845732	-0.00277548	-0.00393142	-0.00161954	14375	38517452	0.0373207	10188	28642163	0.0355699	9105	26103837	0.0348799	9372	27161364	0.0345049	7793	22945505	0.0339631	7914	22183832	0.0356746	9314	26358245	0.0353362	10831	28730741	0.0376983	10268	26223346	0.0391559	10576	26962296	0.0392251	8297	21374961	0.0388164	7970	20608942	0.0386725	7665	20367957	0.0376326	6955
K15580 oligopeptide transport system substrate-binding protein	0.0588844	0.00266435	0.0662036	0.00299281	0.000275755	0.00846073	-0.0073192	-0.0105715	-0.00406687	24065	38517452	0.0624782	17280	28642163	0.0603306	14099	26103837	0.0540112	15367	27161364	0.0565767	13033	22945505	0.0567998	13197	22183832	0.0594893	16222	26358245	0.0615443	17194	28730741	0.0598453	16455	26223346	0.0627494	17510	26962296	0.0649425	13679	21374961	0.0639954	13202	20608942	0.0640596	13538	20367957	0.0664671	13128
K00886 polyphosphate glucokinase [EC:2.7.1.63]	0.00355574	0.000868377	0.00156071	0.000383868	0.000275562	0.00847785	0.00199503	0.00119133	0.00279873	1733	38517452	0.00449926	1004	28642163	0.00350532	1065	26103837	0.00407986	1082	27161364	0.0039836	1019	22945505	0.00444096	766	22183832	0.00345297	714	26358245	0.00270883	510	28730741	0.0017751	385	26223346	0.00146816	451	26962296	0.00167271	294	21374961	0.00137544	211	20608942	0.00102383	468	20367957	0.00229773	350
K02838 ribosome recycling factor	0.0317428	0.00147918	0.0351193	0.000717099	0.000275547	0.00850055	-0.00337649	-0.00475867	-0.00199431	12121	38517452	0.0314689	9058	28642163	0.0316247	8062	26103837	0.0308843	7882	27161364	0.0290192	7494	22945505	0.03266	7124	22183832	0.0321135	8318	26358245	0.0315575	9945	28730741	0.0346145	8865	26223346	0.0338058	9388	26962296	0.034819	7561	21374961	0.0353732	7248	20608942	0.0351692	7145	20367957	0.0350796	6329
K07794 putative tricarboxylic transport membrane protein	0.00837238	0.000900014	0.00619961	0.000768029	0.000271224	0.00850662	0.00217277	0.0012114	0.00313415	3073	38517452	0.0079782	2411	28642163	0.00841766	1997	26103837	0.00765022	2023	27161364	0.00744808	2265	22945505	0.00987121	2096	22183832	0.00944832	2349	26358245	0.00891182	2084	28730741	0.00725355	1286	26223346	0.00490403	1416	26962296	0.00525178	1402	21374961	0.00655908	1428	20608942	0.00692903	1423	20367957	0.00698646	1042
K05838 putative thioredoxin	0.00709826	0.00106738	0.00393232	0.00133618	0.000269743	0.00850747	0.00316595	0.00177322	0.00455867	2517	38517452	0.0065347	1712	28642163	0.0059772	2260	26103837	0.00865773	2252	27161364	0.00829119	1929	22945505	0.00840688	1349	22183832	0.00608101	1714	26358245	0.00650271	1820	28730741	0.00633468	870	26223346	0.00331765	1047	26962296	0.0038832	663	21374961	0.00310176	568	20608942	0.00275609	706	20367957	0.00346623	473
K02450 general secretion pathway protein A	0.0576286	0.00897405	0.0366202	0.00680093	0.000269126	0.00851178	0.0210084	0.0118175	0.0301993	24520	38517452	0.0636595	18508	28642163	0.064618	16407	26103837	0.0628528	18011	27161364	0.0663111	13224	22945505	0.0576322	13433	22183832	0.0605531	11529	26358245	0.0437396	11970	28730741	0.0416627	7852	26223346	0.0299428	8418	26962296	0.0312214	7306	21374961	0.0341802	6878	20608942	0.0333739	9993	20367957	0.0490624	8511
K00784 ribonuclease Z [EC:3.1.26.11]	0.0513173	0.00295407	0.0438451	0.0028391	0.000270688	0.00851348	0.00747227	0.00415038	0.0107942	19064	38517452	0.0494944	13745	28642163	0.0479887	14448	26103837	0.0553482	15339	27161364	0.0564736	11300	22945505	0.0492471	11472	22183832	0.0517133	13646	26358245	0.0517713	13935	28730741	0.0485021	10658	26223346	0.0406432	11573	26962296	0.0429229	9405	21374961	0.0440001	8476	20608942	0.0411278	9052	20367957	0.0444424	7436
K03313 Na+	0.0065121	0.00141061	0.00311174	0.00120442	0.000275309	0.00851647	0.00340036	0.00189326	0.00490747	2052	38517452	0.00532746	1427	28642163	0.00498217	2062	26103837	0.00789922	1962	27161364	0.0072235	2094	22945505	0.00912597	1518	22183832	0.00684282	1466	26358245	0.00556183	1475	28730741	0.00513387	497	26223346	0.00189526	489	26962296	0.00181364	511	21374961	0.00239065	392	20608942	0.00190209	846	20367957	0.00415358	590
K00305 sarcosine oxidase, subunit gamma [EC:1.5.3.1]	0.000593715	0.000178083	0.000163848	0.000151392	0.000268544	0.00851721	0.000429867	0.000239925	0.000619808	246	38517452	0.000638672	174	28642163	0.000607496	239	26103837	0.000915574	187	27161364	0.000688478	153	22945505	0.000666797	102	22183832	0.000459794	134	26358245	0.00050838	76	28730741	0.000264525	10	26223346	3.8134e-05	22	26962296	8.15954e-05	21	21374961	9.82458e-05	3	20608942	1.45568e-05	45	20367957	0.000220935	10
K10716 voltage-gated potassium channel	0.0427762	0.00397744	0.0337551	0.00237717	0.000280735	0.00852093	0.00902113	0.00518421	0.0128581	15118	38517452	0.0392497	10856	28642163	0.0379022	12371	26103837	0.0473915	12740	27161364	0.0469049	10854	22945505	0.0473034	9953	22183832	0.044866	10677	26358245	0.0405072	10942	28730741	0.0380846	8164	26223346	0.0311326	8516	26962296	0.0315848	6541	21374961	0.0306012	6790	20608942	0.0329469	7468	20367957	0.0366654	6258
K03975 membrane-associated protein	0.017154	0.00209846	0.012277	0.00156778	0.000279642	0.00853361	0.00487696	0.00273737	0.00701655	6721	38517452	0.0174492	5140	28642163	0.0179456	5228	26103837	0.0200277	5044	27161364	0.0185705	4367	22945505	0.0190321	3496	22183832	0.0157592	3513	26358245	0.0133279	4344	28730741	0.0151197	2894	26223346	0.011036	3293	26962296	0.0122134	2147	21374961	0.0100445	2434	20608942	0.0118104	2588	20367957	0.0127062	2034
K00350 Na+-transporting NADH	0.00327947	0.000571345	0.00194339	0.000202199	0.000280504	0.00853686	0.00133608	0.000815397	0.00185677	1210	38517452	0.00314143	1022	28642163	0.00356817	1028	26103837	0.00393812	998	27161364	0.00367434	833	22945505	0.00363034	778	22183832	0.00350706	703	26358245	0.0026671	606	28730741	0.00210924	528	26223346	0.00201347	509	26962296	0.00188782	381	21374961	0.00178246	365	20608942	0.00177108	484	20367957	0.00237628	379
K04091 alkanesulfonate monooxygenase [EC:1.14.14.5]	0.019038	0.0055933	0.00569137	0.00164123	0.000275269	0.00853862	0.0133467	0.00828719	0.0184061	4968	38517452	0.012898	3211	28642163	0.0112107	6375	26103837	0.0244217	6895	27161364	0.0253853	5560	22945505	0.0242313	3953	22183832	0.0178193	6134	26358245	0.0232717	3754	28730741	0.0130661	1339	26223346	0.00510614	904	26962296	0.00335283	810	21374961	0.00378948	994	20608942	0.00482315	1395	20367957	0.00684899	1056
K02988 small subunit ribosomal protein S5	0.031323	0.00171364	0.0353155	0.000653166	0.000273769	0.00853901	-0.00399256	-0.00556079	-0.00242432	12028	38517452	0.0312274	9148	28642163	0.0319389	7771	26103837	0.0297696	7878	27161364	0.0290044	7141	22945505	0.0311216	6803	22183832	0.0306665	8355	26358245	0.0316979	10101	28730741	0.0351575	9441	26223346	0.0360023	9560	26962296	0.0354569	7565	21374961	0.0353919	7528	20608942	0.0365278	7018	20367957	0.0344561	6349
K03076 preprotein translocase subunit SecY	0.0680801	0.00309223	0.0752546	0.00122502	0.000274868	0.00854968	-0.00717448	-0.0100115	-0.0043375	26970	38517452	0.0700202	20082	28642163	0.0701134	16909	26103837	0.0647759	17420	27161364	0.0641352	15677	22945505	0.0683227	14554	22183832	0.0656063	17821	26358245	0.0676107	21277	28730741	0.0740566	19889	26223346	0.0758446	20199	26962296	0.0749157	16347	21374961	0.0764773	15474	20608942	0.0750839	14861	20367957	0.0729626	13889
K03803 sigma-E factor negative regulatory protein RseC	0.00141955	0.000216838	0.000872879	0.000207413	0.000273553	0.00855591	0.000546674	0.000303381	0.000789968	517	38517452	0.00134225	334	28642163	0.00116611	469	26103837	0.00179667	354	27161364	0.00130332	378	22945505	0.00164738	296	22183832	0.00133431	420	26358245	0.00159343	337	28730741	0.00117296	247	26223346	0.000941909	205	26962296	0.000760321	131	21374961	0.000612867	109	20608942	0.000528897	199	20367957	0.000977025	166
K04096 DNA processing protein	0.057089	0.00244792	0.0643454	0.00308465	0.00028322	0.00857329	-0.00725635	-0.0104642	-0.00404852	21513	38517452	0.0558526	16795	28642163	0.0586373	14613	26103837	0.0559803	15296	27161364	0.0563153	12720	22945505	0.0554357	12220	22183832	0.0550852	14867	26358245	0.0564036	18101	28730741	0.0630022	16277	26223346	0.0620706	18288	26962296	0.0678281	13734	21374961	0.0642527	14314	20608942	0.0694553	12844	20367957	0.0630598	11451
K00700 1,4-alpha-glucan branching enzyme [EC:2.4.1.18]	0.0530418	0.00285533	0.0455737	0.00296835	0.000285202	0.00858725	0.00746806	0.00412873	0.0108074	19250	38517452	0.0499773	14574	28642163	0.050883	14295	26103837	0.0547621	15719	27161364	0.0578726	12887	22945505	0.0561635	11862	22183832	0.0534714	13663	26358245	0.0518358	14184	28730741	0.0493687	11000	26223346	0.0419474	11446	26962296	0.0424519	9694	21374961	0.0453521	8639	20608942	0.0419187	9951	20367957	0.0488562	8430
K03696 ATP-dependent Clp protease ATP-binding subunit ClpC	0.159037	0.0132971	0.226833	0.0296752	0.000285165	0.00860908	-0.0677963	-0.0952962	-0.0402965	62109	38517452	0.161249	47531	28642163	0.165948	36374	26103837	0.139343	37805	27161364	0.139187	35398	22945505	0.15427	36029	22183832	0.162411	44937	26358245	0.170486	51544	28730741	0.179404	66251	26223346	0.252641	67708	26962296	0.251121	55291	21374961	0.258672	51372	20608942	0.24927	43966	20367957	0.215859	40512
K01451 hippurate hydrolase [EC:3.5.1.32]	0.00622882	0.00197745	0.00171514	0.000859621	0.000292214	0.0087517	0.00451367	0.00268625	0.00634109	1995	38517452	0.00517947	1266	28642163	0.00442006	2560	26103837	0.00980699	2330	27161364	0.00857836	1597	22945505	0.00695997	1411	22183832	0.00636049	1226	26358245	0.0046513	1113	28730741	0.0038739	207	26223346	0.000789373	230	26962296	0.000853043	221	21374961	0.00103392	200	20608942	0.000970453	424	20367957	0.0020817	384
K07331 archaeal flagellar protein FlaH	0.00304263	0.000577259	0.00466626	0.000678918	0.000291953	0.00876714	-0.00162363	-0.00234781	-0.00089946	1091	38517452	0.00283248	907	28642163	0.00316666	580	26103837	0.0022219	724	27161364	0.00266555	580	22945505	0.00252773	785	22183832	0.00353861	1096	26358245	0.00415809	928	28730741	0.00322999	1305	26223346	0.00497648	1484	26962296	0.00550398	906	21374961	0.0042386	1056	20608942	0.00512399	1081	20367957	0.00530736	878
K11175 phosphoribosylglycinamide formyltransferase 1 [EC:2.1.2.2]	0.0296447	0.00234284	0.035128	0.00186696	0.000299012	0.00883808	-0.00548332	-0.00792323	-0.00304341	10284	38517452	0.0266996	7769	28642163	0.0271243	7220	26103837	0.0276588	7890	27161364	0.0290486	7056	22945505	0.0307511	6606	22183832	0.0297784	8633	26358245	0.0327526	9580	28730741	0.0333441	9190	26223346	0.0350451	9570	26962296	0.035494	8119	21374961	0.0379837	7663	20608942	0.0371829	6414	20367957	0.0314906	6120
K15781 putative phosphoserine phosphatase / 1-acylglycerol-3-phosphate O-acyltransferase [EC:3.1.3.3 2.3.1.51]	0.0106139	0.00278732	0.00404439	0.000822445	0.000298464	0.00884503	0.00656954	0.00404782	0.00909127	3081	38517452	0.00799897	1992	28642163	0.00695478	3565	26103837	0.013657	3248	27161364	0.0119582	3433	22945505	0.0149615	2480	22183832	0.0111793	2894	26358245	0.0109795	2075	28730741	0.00722223	848	26223346	0.00323376	835	26962296	0.00309692	720	21374961	0.00336843	730	20608942	0.00354215	1034	20367957	0.0050766	759
K02655 type IV pilus assembly protein PilE	0.00490145	0.000904955	0.00286137	0.000553844	0.000297367	0.00885902	0.00204008	0.00116298	0.00291718	2128	38517452	0.00552477	1472	28642163	0.00513928	1482	26103837	0.00567733	1448	27161364	0.0053311	1312	22945505	0.0057179	1065	22183832	0.00480079	1089	26358245	0.00413153	830	28730741	0.00288889	704	26223346	0.00268463	593	26962296	0.00219937	637	21374961	0.00298012	545	20608942	0.00264448	798	20367957	0.00391792	640
K07816 putative GTP pyrophosphokinase [EC:2.7.6.5]	0.00186031	0.000202752	0.00134115	0.000204395	0.000298443	0.0088677	0.000519162	0.000285775	0.00075255	555	38517452	0.00144091	501	28642163	0.00174917	487	26103837	0.00186563	531	27161364	0.00195498	462	22945505	0.00201347	485	22183832	0.00218628	489	26358245	0.00185521	522	28730741	0.00181687	405	26223346	0.00154443	361	26962296	0.00133891	318	21374961	0.00148772	198	20608942	0.000960748	306	20367957	0.00150236	189
K01881 prolyl-tRNA synthetase [EC:6.1.1.15]	0.0887018	0.00382993	0.0973356	0.00196892	0.000297107	0.00887469	-0.00863383	-0.0122391	-0.0050286	34347	38517452	0.0891726	25459	28642163	0.0888864	21574	26103837	0.0826469	22765	27161364	0.0838139	20214	22945505	0.0880957	19855	22183832	0.0895021	24311	26358245	0.092233	27370	28730741	0.0952638	24797	26223346	0.0945608	25895	26962296	0.0960415	20619	21374961	0.0964633	20008	20608942	0.0970841	19601	20367957	0.0962345	18309
K13529 AraC family transcriptional regulator, regulatory protein of adaptative response / DNA-3-methyladenine glycosylase II [EC:3.2.2.21]	0.00448721	0.00169201	0.000586773	0.000619719	0.000303571	0.00894941	0.00390044	0.00235563	0.00544524	1127	38517452	0.00292595	758	28642163	0.00264645	2037	26103837	0.00780345	1745	27161364	0.00642457	845	22945505	0.00368264	1110	22183832	0.00500364	1058	26358245	0.00401392	976	28730741	0.00339706	71	26223346	0.000270751	79	26962296	0.000293002	84	21374961	0.000392983	20	20608942	9.70453e-05	39	20367957	0.000191477	27
K03979 GTPase [EC:3.6.5.-]	0.0713316	0.00550035	0.0838548	0.00394185	0.000313141	0.00901957	-0.0125232	-0.0180625	-0.00698392	27356	38517452	0.0710224	20177	28642163	0.0704451	16901	26103837	0.0647453	18236	27161364	0.0671395	15750	22945505	0.0686409	15205	22183832	0.0685409	20435	26358245	0.0775279	23729	28730741	0.082591	22470	26223346	0.085687	23074	26962296	0.0855788	18229	21374961	0.085282	17419	20608942	0.0845216	15834	20367957	0.0777398	13862
K01491 methylenetetrahydrofolate dehydrogenase (NADP+) / methenyltetrahydrofolate cyclohydrolase [EC:1.5.1.5 3.5.4.9]	0.0466212	0.00315272	0.0541283	0.00270791	0.000312594	0.00902685	-0.00750702	-0.0108833	-0.00413072	17435	38517452	0.0452652	13300	28642163	0.046435	11167	26103837	0.0427792	11949	27161364	0.0439926	10719	22945505	0.046715	10214	22183832	0.0460425	12585	26358245	0.047746	15513	28730741	0.0539944	13477	26223346	0.0513931	14278	26962296	0.0529554	11393	21374961	0.0533007	11409	20608942	0.0553595	11138	20367957	0.0546839	10921
K03316 monovalent cation	0.00551489	0.00103377	0.00319878	0.000617194	0.000310342	0.0090311	0.00231611	0.00131907	0.00331315	2497	38517452	0.00648278	1819	28642163	0.00635078	1440	26103837	0.00551643	1304	27161364	0.00480094	1418	22945505	0.00617986	1469	22183832	0.00662194	1225	26358245	0.0046475	1011	28730741	0.00351888	942	26223346	0.00359222	884	26962296	0.00327865	535	21374961	0.00250293	704	20608942	0.00341599	775	20367957	0.003805	343
K13038 phosphopantothenoylcysteine decarboxylase / phosphopantothenate---cysteine ligase [EC:4.1.1.36 6.3.2.5]	0.0549154	0.00270381	0.0609986	0.00175394	0.000312079	0.0090351	-0.00608327	-0.00873723	-0.00342931	21241	38517452	0.0551464	15965	28642163	0.0557395	13440	26103837	0.0514867	14058	27161364	0.0517573	12332	22945505	0.0537447	12017	22183832	0.0541701	14986	26358245	0.0568551	17360	28730741	0.0604231	15794	26223346	0.0602288	16381	26962296	0.0607552	13418	21374961	0.0627744	13056	20608942	0.0633511	11761	20367957	0.0577427	10700
K07461 putative endonuclease	0.0323391	0.00218337	0.0389179	0.00284706	0.000308441	0.00904574	-0.00657879	-0.00950577	-0.0036518	12790	38517452	0.0332057	9385	28642163	0.0327664	7444	26103837	0.0285169	8416	27161364	0.0309852	7163	22945505	0.0312174	7246	22183832	0.0326634	8599	26358245	0.0326236	10554	28730741	0.0367342	10647	26223346	0.0406012	10898	26962296	0.0404194	9373	21374961	0.0438504	8462	20608942	0.0410598	7181	20367957	0.0352564	6853
K05563 multicomponent K+	0.000467548	0.000176514	4.67077e-05	4.18618e-05	0.000310051	0.00904597	0.000420841	0.000261962	0.000579719	156	38517452	0.000405011	98	28642163	0.000342153	185	26103837	0.000708708	193	27161364	0.000710568	123	22945505	0.000536053	116	22183832	0.000522903	44	26358245	0.000166931	100	28730741	0.000348059	10	26223346	3.8134e-05	5	26962296	1.85444e-05	0	21374961	0	10	20608942	4.85226e-05	6	20367957	2.9458e-05	2
K14347 solute carrier family 10 (sodium/bile acid cotransporter), member 7	0.00223932	0.000639586	0.000742607	0.00051576	0.000307779	0.00904984	0.00149672	0.000827841	0.00216559	530	38517452	0.001376	452	28642163	0.00157809	656	26103837	0.00251304	749	27161364	0.00275759	670	22945505	0.00291996	683	22183832	0.00307882	583	26358245	0.00221183	425	28730741	0.00147925	91	26223346	0.000347019	42	26962296	0.000155773	50	21374961	0.000233919	104	20608942	0.000504635	357	20367957	0.00175275	224
K09984 uncharacterized protein	0.000185735	7.27542e-05	9.31592e-06	1.25552e-05	0.000311979	0.0090554	0.00017642	0.000111179	0.00024166	90	38517452	0.00023366	65	28642163	0.000226938	79	26103837	0.000302638	51	27161364	0.000187767	14	22945505	6.10141e-05	44	22183832	0.000198343	24	26358245	9.10531e-05	53	28730741	0.000184471	0	26223346	0	0	26962296	0	7	21374961	3.27486e-05	0	20608942	0	0	20367957	0	0
K07341 death on curing protein	0.00927606	0.00171633	0.00542218	0.000854477	0.000309637	0.00905727	0.00385388	0.00224495	0.00546281	3152	38517452	0.0081833	2395	28642163	0.0083618	3019	26103837	0.0115653	3214	27161364	0.011833	2024	22945505	0.0088209	2225	22183832	0.0100298	2407	26358245	0.00913187	1805	28730741	0.00628247	1330	26223346	0.00507182	1429	26962296	0.00529999	946	21374961	0.00442574	1093	20608942	0.00530352	1535	20367957	0.00753635	896
K08177 MFS transporter, OFA family, oxalate/formate antiporter	0.036422	0.00226645	0.0305165	0.00239175	0.000317715	0.00910487	0.00590552	0.00323367	0.00857737	15040	38517452	0.0390472	11176	28642163	0.0390194	9329	26103837	0.035738	8911	27161364	0.0328076	8682	22945505	0.0378375	8463	22183832	0.0381494	8912	26358245	0.0338111	10046	28730741	0.034966	7576	26223346	0.0288903	7407	26962296	0.0274717	6079	21374961	0.0284398	5880	20608942	0.0285313	6385	20367957	0.0313483	5847
K07267 porin	0.00886909	0.00176534	0.00465866	0.00153059	0.000316921	0.00910522	0.00421043	0.00231278	0.00610808	3528	38517452	0.00915948	2746	28642163	0.00958726	2854	26103837	0.0109333	2991	27161364	0.011012	2029	22945505	0.00884269	1861	22183832	0.00838899	1337	26358245	0.00507242	2286	28730741	0.00795663	927	26223346	0.00353502	1014	26962296	0.00376081	632	21374961	0.00295673	630	20608942	0.00305693	917	20367957	0.00450217	1024
K04764 integration host factor subunit alpha	0.00816319	0.00173503	0.00428137	0.00108586	0.000319796	0.0091413	0.00388182	0.00219233	0.00557132	2443	38517452	0.00634258	1920	28642163	0.0067034	2460	26103837	0.0094239	2499	27161364	0.00920057	2474	22945505	0.0107821	2206	22183832	0.00994418	1642	26358245	0.00622955	1919	28730741	0.00667926	888	26223346	0.0033863	826	26962296	0.00306354	752	21374961	0.00351814	673	20608942	0.00326557	1239	20367957	0.00608308	990
K03801 lipoyl(octanoyl) transferase [EC:2.3.1.181]	0.0172565	0.00133726	0.0141727	0.00104047	0.000323138	0.0091903	0.00308383	0.00170247	0.00446519	6263	38517452	0.0162602	4778	28642163	0.0166817	4652	26103837	0.0178211	4806	27161364	0.0176943	4403	22945505	0.0191889	4027	22183832	0.0181529	4683	26358245	0.0177667	4162	28730741	0.0144862	3719	26223346	0.014182	3422	26962296	0.0126918	3012	21374961	0.0140913	2539	20608942	0.0123199	3078	20367957	0.015112	2729
K13640 MerR family transcriptional regulator, heat shock protein HspR	0.0100761	0.000702653	0.0116411	0.000386082	0.000322852	0.00920536	-0.00156502	-0.00223293	-0.000897116	3546	38517452	0.00920622	2891	28642163	0.0100935	2317	26103837	0.00887609	2681	27161364	0.00987064	2403	22945505	0.0104726	2264	22183832	0.0102056	2848	26358245	0.010805	3183	28730741	0.0110787	3172	26223346	0.0120961	3078	26962296	0.0114159	2573	21374961	0.0120374	2361	20608942	0.0114562	2230	20367957	0.0109486	2049
K00097 4-hydroxythreonine-4-phosphate dehydrogenase [EC:1.1.1.262]	0.0170916	0.00113416	0.0144903	0.000864067	0.000324917	0.00921769	0.00260132	0.00143779	0.00376484	6944	38517452	0.0180282	5314	28642163	0.0185531	4726	26103837	0.0181046	4694	27161364	0.0172819	3893	22945505	0.0169663	3764	22183832	0.0169673	3923	26358245	0.0148834	4582	28730741	0.0159481	3987	26223346	0.015204	3761	26962296	0.0139491	3035	21374961	0.0141989	2877	20608942	0.01396	2977	20367957	0.0146161	2329
K02050 NitT/TauT family transport system permease protein	0.0374001	0.00315748	0.0303229	0.00210638	0.00032954	0.00932541	0.00707716	0.00395712	0.0101972	14775	38517452	0.0383592	11424	28642163	0.0398853	10877	26103837	0.0416682	11268	27161364	0.0414854	7991	22945505	0.034826	7912	22183832	0.0356656	8820	26358245	0.033462	9725	28730741	0.0338488	7692	26223346	0.0293326	8600	26962296	0.0318964	6707	21374961	0.0313778	6436	20608942	0.0312292	5616	20367957	0.0275727	4787
K16052 MscS family membrane protein	0.0137176	0.00202231	0.00884637	0.00182685	0.000331852	0.00934398	0.00487127	0.00265989	0.00708265	5633	38517452	0.0146245	4727	28642163	0.0165036	4071	26103837	0.0155954	4109	27161364	0.0151281	3132	22945505	0.0136497	2765	22183832	0.012464	2681	26358245	0.0101714	3334	28730741	0.0116043	1750	26223346	0.00667344	1995	26962296	0.00739922	1514	21374961	0.00708305	1615	20608942	0.0078364	2396	20367957	0.0117636	2069
K16066 3-hydroxy acid dehydrogenase / malonic semialdehyde reductase [EC:1.1.1.381 1.1.1.-]	0.00551474	0.000888204	0.00352995	0.000578225	0.000331226	0.00934969	0.00198479	0.00111224	0.00285734	2233	38517452	0.00579737	1864	28642163	0.00650789	1781	26103837	0.00682275	1569	27161364	0.00577659	1322	22945505	0.00576148	957	22183832	0.00431395	1282	26358245	0.00486375	1228	28730741	0.00427417	877	26223346	0.00334435	827	26962296	0.00306725	617	21374961	0.00288655	561	20608942	0.00272212	903	20367957	0.00443343	671
K20035 3-(methylthio)propanoyl-CoA dehydrogenase [EC:1.3.8.-]	0.00929657	0.00232622	0.00414272	0.00137628	0.000339109	0.00950094	0.00515385	0.00291415	0.00739354	3632	38517452	0.00942949	2042	28642163	0.00712935	3323	26103837	0.0127299	3273	27161364	0.0120502	2304	22945505	0.0100412	2289	22183832	0.0103183	1726	26358245	0.00654824	1760	28730741	0.00612584	550	26223346	0.00209737	717	26962296	0.00265927	919	21374961	0.00429942	536	20608942	0.00260081	1037	20367957	0.00509133	942
K00347 Na+-transporting NADH	0.00483535	0.000913086	0.00272331	0.000269988	0.000338736	0.00951411	0.00211204	0.0012859	0.00293817	1976	38517452	0.00513014	1368	28642163	0.00477618	1545	26103837	0.00591867	1641	27161364	0.00604167	1139	22945505	0.00496394	1082	22183832	0.00487743	1021	26358245	0.00387355	891	28730741	0.00310121	690	26223346	0.00263124	868	26962296	0.00321931	595	21374961	0.00278363	600	20608942	0.00291136	582	20367957	0.00285743	451
K10533 limonene-1,2-epoxide hydrolase [EC:3.3.2.8]	0.0012398	0.00043272	0.000262501	0.000166233	0.000340806	0.00952484	0.000977303	0.000581107	0.0013735	271	38517452	0.000703577	174	28642163	0.000607496	387	26103837	0.00148254	435	27161364	0.00160154	402	22945505	0.00175198	316	22183832	0.00142446	414	26358245	0.00157067	223	28730741	0.000776172	46	26223346	0.000175416	25	26962296	9.27221e-05	13	21374961	6.08188e-05	35	20608942	0.000169829	52	20367957	0.000255303	60
K02956 small subunit ribosomal protein S15	0.0176661	0.000737367	0.0193083	0.000487928	0.000345175	0.00955237	-0.0016422	-0.00236938	-0.000915018	6698	38517452	0.0173895	5015	28642163	0.0175092	4367	26103837	0.0167293	4525	27161364	0.0166597	4380	22945505	0.0190887	4003	22183832	0.0180447	4762	26358245	0.0180665	5126	28730741	0.0178415	5061	26223346	0.0192996	5135	26962296	0.0190451	4116	21374961	0.0192562	4176	20608942	0.020263	3857	20367957	0.0189366	3597
K18139 outer membrane protein, multidrug efflux system	0.0182164	0.00400245	0.00890327	0.0033113	0.000344937	0.00956925	0.00931316	0.00508819	0.0135381	7200	38517452	0.0186928	5202	28642163	0.018162	6310	26103837	0.0241727	5893	27161364	0.0216963	4606	22945505	0.0200736	4146	22183832	0.0186893	2907	26358245	0.0110288	3797	28730741	0.0132158	1398	26223346	0.00533113	1575	26962296	0.00584149	1413	21374961	0.00661054	1303	20608942	0.0063225	2887	20367957	0.0141742	2507
K10819 histidine kinase [EC:2.7.13.3]	0.0109576	0.00158612	0.0073973	0.00112067	0.000346804	0.00957401	0.00356031	0.00196931	0.0051513	4202	38517452	0.0109093	2814	28642163	0.00982468	3270	26103837	0.0125269	3305	27161364	0.012168	2946	22945505	0.0128391	2662	22183832	0.0119997	2246	26358245	0.00852105	2549	28730741	0.00887203	1668	26223346	0.00636074	1539	26962296	0.00570797	1392	21374961	0.00651229	1546	20608942	0.0075016	1666	20367957	0.00817951	1283
K00351 Na+-transporting NADH	0.0131124	0.000962653	0.0164827	0.00151891	0.000344801	0.00958905	-0.00337037	-0.00485346	-0.00188727	4545	38517452	0.0117998	3649	28642163	0.01274	3098	26103837	0.011868	3498	27161364	0.0128786	3117	22945505	0.0135844	2987	22183832	0.0134648	3938	26358245	0.0149403	3914	28730741	0.013623	4540	26223346	0.0173128	3908	26962296	0.0144943	4225	21374961	0.0197661	3237	20608942	0.0157068	3381	20367957	0.0165996	3078
K02454 general secretion pathway protein E	0.0850938	0.00959178	0.106264	0.00493498	0.000350296	0.00959998	-0.0211706	-0.0302006	-0.0121406	30120	38517452	0.0781983	22989	28642163	0.0802628	19139	26103837	0.0733187	20089	27161364	0.0739617	19980	22945505	0.0870759	20954	22183832	0.0944562	24323	26358245	0.0922785	29075	28730741	0.101198	28338	26223346	0.108064	27795	26962296	0.103088	22718	21374961	0.106283	23240	20608942	0.112767	21951	20367957	0.107772	20394
K18608 pyridoxamine---pyruvate transaminase [EC:2.6.1.30]	0.000173934	6.59499e-05	2.32745e-05	2.18628e-05	0.00034474	0.00961102	0.00015066	9.074e-05	0.00021058	104	38517452	0.000270007	75	28642163	0.000261852	46	26103837	0.000176219	62	27161364	0.000228265	23	22945505	0.000100237	24	22183832	0.000108187	32	26358245	0.000121404	36	28730741	0.000125301	0	26223346	0	14	26962296	5.19244e-05	0	21374961	0	3	20608942	1.45568e-05	10	20367957	4.90967e-05	4
K02274 cytochrome c oxidase subunit I [EC:1.9.3.1]	0.021407	0.00367777	0.0132957	0.0019664	0.000349862	0.00961143	0.00811134	0.00463005	0.0115926	9042	38517452	0.0234751	6262	28642163	0.0218629	6906	26103837	0.0264559	6823	27161364	0.0251202	5358	22945505	0.023351	4017	22183832	0.0181078	4206	26358245	0.0159571	4863	28730741	0.0169261	3767	26223346	0.0143651	3567	26962296	0.0132296	2725	21374961	0.0127486	2617	20608942	0.0126984	2490	20367957	0.0122251	1700
K02825 pyrimidine operon attenuation protein / uracil phosphoribosyltransferase [EC:2.4.2.9]	0.0210717	0.00215193	0.0259508	0.000751723	0.00035182	0.0096184	-0.00487902	-0.00683887	-0.00291917	7615	38517452	0.0197703	5796	28642163	0.0202359	4797	26103837	0.0183766	5224	27161364	0.0192332	4754	22945505	0.0207187	4814	22183832	0.0217005	6072	26358245	0.0230364	7327	28730741	0.0255023	6709	26223346	0.0255841	7136	26962296	0.0264666	5742	21374961	0.0268632	5535	20608942	0.0268573	5288	20367957	0.0259623	4708
K19519 transforming growth factor-beta-induced protein	0.0144755	0.003328	0.00708799	0.00218807	0.000352845	0.00962313	0.0073875	0.00411053	0.0106645	4784	38517452	0.0124203	3230	28642163	0.0112771	4378	26103837	0.0167715	4605	27161364	0.0169542	4378	22945505	0.01908	3888	22183832	0.0175263	3344	26358245	0.0126867	2611	28730741	0.00908783	1485	26223346	0.00566289	1440	26962296	0.00534079	1015	21374961	0.00474855	901	20608942	0.00437189	2063	20367957	0.0101287	1553
K18828 tRNA(fMet)-specific endonuclease VapC [EC:3.1.-.-]	0.0295017	0.00364277	0.0196457	0.00416636	0.000349678	0.00962979	0.00985597	0.00536206	0.0143499	10965	38517452	0.0284676	8120	28642163	0.0283498	8884	26103837	0.0340333	8893	27161364	0.0327414	7449	22945505	0.0324639	6924	22183832	0.0312119	6965	26358245	0.0264244	6413	28730741	0.022321	4198	26223346	0.0160086	4433	26962296	0.0164415	3422	21374961	0.0160094	2890	20608942	0.014023	5208	20367957	0.0255696	4299
K02935 large subunit ribosomal protein L7/L12	0.025951	0.00133786	0.0292414	0.00129265	0.000355694	0.00967743	-0.00329043	-0.00479868	-0.00178218	9567	38517452	0.0248381	7316	28642163	0.0255428	6643	26103837	0.0254484	6729	27161364	0.0247742	6342	22945505	0.0276394	5710	22183832	0.0257395	6578	26358245	0.0249561	8237	28730741	0.0286696	7655	26223346	0.0291915	7719	26962296	0.0286289	6732	21374961	0.0314948	6423	20608942	0.0311661	5915	20367957	0.0290407	5111
K22130 3-dehydro-4-phosphotetronate decarboxylase [EC:4.1.1.104]	0.000741894	0.000258937	0.000158089	9.40803e-05	0.000357157	0.0096939	0.000583805	0.0003475	0.00082011	348	38517452	0.000903487	232	28642163	0.000809995	258	26103837	0.00098836	181	27161364	0.000666388	239	22945505	0.0010416	171	22183832	0.000770832	153	26358245	0.000580464	50	28730741	0.00017403	20	26223346	7.62679e-05	18	26962296	6.67599e-05	35	21374961	0.000163743	14	20608942	6.79317e-05	35	20367957	0.000171839	57
K05816 sn-glycerol 3-phosphate transport system ATP-binding protein [EC:3.6.3.20]	0.00309824	0.00108319	0.000701384	0.000493466	0.000359416	0.00973181	0.00239686	0.00139146	0.00340226	942	38517452	0.00244564	731	28642163	0.00255218	1055	26103837	0.00404155	1056	27161364	0.00388788	1069	22945505	0.00465886	836	22183832	0.00376851	576	26358245	0.00218527	358	28730741	0.00124605	48	26223346	0.000183043	32	26962296	0.000118684	49	21374961	0.00022924	70	20608942	0.000339658	278	20367957	0.00136489	215
K01442 choloylglycine hydrolase [EC:3.5.1.24]	0.0119772	0.00210947	0.00726928	0.00148321	0.000361851	0.00975099	0.00470788	0.00259475	0.006821	4169	38517452	0.0108237	3129	28642163	0.0109245	4032	26103837	0.015446	3855	27161364	0.014193	3181	22945505	0.0138633	2561	22183832	0.0115444	2403	26358245	0.00911669	2846	28730741	0.00990577	1620	26223346	0.0061777	1599	26962296	0.0059305	1283	21374961	0.00600235	1127	20608942	0.0054685	1740	20367957	0.00854283	1363
K20454 2,3-dimethylmalate lyase [EC:4.1.3.32]	0.00613979	0.000871451	0.00408801	0.000760049	0.000361722	0.00977081	0.00205178	0.00111277	0.00299079	2093	38517452	0.0054339	1708	28642163	0.00596324	1735	26103837	0.00664653	2060	27161364	0.0075843	1183	22945505	0.00515569	1261	22183832	0.00568432	1928	26358245	0.0073146	1533	28730741	0.00533575	899	26223346	0.00342824	892	26962296	0.00330832	647	21374961	0.00302691	861	20608942	0.0041778	780	20367957	0.00382954	893
K10206 LL-diaminopimelate aminotransferase [EC:2.6.1.83]	0.0445148	0.00519788	0.0560118	0.00342157	0.000363871	0.00978207	-0.0114971	-0.0166167	-0.00637741	16489	38517452	0.0428092	13049	28642163	0.0455587	9411	26103837	0.0360522	10168	27161364	0.0374355	10541	22945505	0.0459393	10574	22183832	0.0476653	12652	26358245	0.0480002	15129	28730741	0.0526579	14846	26223346	0.0566137	14972	26962296	0.0555294	13063	21374961	0.0611136	12050	20608942	0.0584698	10761	20367957	0.052833	10816
K10255 acyl-lipid omega-6 desaturase (Delta-12 desaturase) [EC:1.14.19.23 1.14.19.45]	0.00540242	0.00145574	0.00221208	0.000814922	0.000367089	0.00979858	0.00319034	0.0018024	0.00457827	2421	38517452	0.00628546	1618	28642163	0.00564901	1898	26103837	0.00727096	2014	27161364	0.00741494	1164	22945505	0.00507289	1045	22183832	0.00471064	868	26358245	0.00329309	1012	28730741	0.00352236	358	26223346	0.0013652	362	26962296	0.00134262	346	21374961	0.00161872	295	20608942	0.00143142	608	20367957	0.00298508	444
K00090 glyoxylate/hydroxypyruvate/2-ketogluconate reductase [EC:1.1.1.79 1.1.1.81 1.1.1.215]	0.00352055	0.00104954	0.00115304	0.00036512	0.000365502	0.00980256	0.00236751	0.00141184	0.00332318	1529	38517452	0.00396963	1220	28642163	0.00425945	1138	26103837	0.00435951	1044	27161364	0.0038437	1006	22945505	0.0043843	850	22183832	0.00383162	547	26358245	0.00207525	414	28730741	0.00144097	310	26223346	0.00118215	261	26962296	0.000968018	140	21374961	0.000654972	221	20608942	0.00107235	413	20367957	0.00202769	190
K10003 glutamate/aspartate transport system permease protein	0.00155226	0.000394757	0.00244381	0.000299495	0.000368276	0.00980708	-0.000891556	-0.00129599	-0.000487118	551	38517452	0.00143052	454	28642163	0.00158508	302	26103837	0.00115692	226	27161364	0.000832064	435	22945505	0.0018958	360	22183832	0.0016228	578	26358245	0.00219286	489	28730741	0.00170201	719	26223346	0.00274183	699	26962296	0.00259251	631	21374961	0.00295205	530	20608942	0.0025717	408	20367957	0.00200315	402
K01801 maleylpyruvate isomerase [EC:5.2.1.4]	0.000836154	0.000310464	0.000152373	0.000145984	0.000367038	0.00982045	0.000683781	0.000394667	0.000972895	318	38517452	0.0008256	274	28642163	0.000956632	303	26103837	0.00116075	328	27161364	0.0012076	253	22945505	0.00110261	114	22183832	0.000513888	166	26358245	0.000629784	84	28730741	0.00029237	7	26223346	2.66938e-05	3	26962296	1.11266e-05	10	21374961	4.67837e-05	4	20608942	1.94091e-05	34	20367957	0.000166929	36
K03098 apolipoprotein D and lipocalin family protein	0.0112015	0.00276801	0.00514262	0.00159228	0.000371661	0.00985077	0.00605891	0.00340749	0.00871033	4617	38517452	0.0119868	3427	28642163	0.0119649	3703	26103837	0.0141857	3522	27161364	0.0129669	2991	22945505	0.0130352	2723	22183832	0.0122747	1943	26358245	0.00737151	1674	28730741	0.00582651	956	26223346	0.00364561	1117	26962296	0.00414282	870	21374961	0.00407018	856	20608942	0.00415354	1675	20367957	0.0082237	1332
K14188 D-alanine--poly(phosphoribitol) ligase subunit 2 [EC:6.1.1.13]	0.0002597	9.11874e-05	5.56029e-05	6.66409e-05	0.000373059	0.00986466	0.000204097	0.000111741	0.000296454	132	38517452	0.000342702	125	28642163	0.00043642	51	26103837	0.000195374	82	27161364	0.000301899	62	22945505	0.000270205	47	22183832	0.000211866	41	26358245	0.000155549	47	28730741	0.000163588	41	26223346	0.000156349	0	26962296	0	0	21374961	0	8	20608942	3.88181e-05	0	20367957	0	3
K08227 MFS transporter, LPLT family, lysophospholipid transporter	0.00176393	0.000689013	0.000181673	0.000185267	0.000374099	0.00986906	0.00158226	0.000960486	0.00220403	689	38517452	0.0017888	435	28642163	0.00151874	684	26103837	0.0026203	649	27161364	0.00238942	574	22945505	0.00250158	396	22183832	0.00178508	168	26358245	0.000637372	250	28730741	0.000870148	6	26223346	2.28804e-05	5	26962296	1.85444e-05	0	21374961	0	14	20608942	6.79317e-05	41	20367957	0.000201297	34
K11325 L-cysteine/cystine lyase	0.00632869	0.00112014	0.00376891	0.000896119	0.000371639	0.00987336	0.00255978	0.00139163	0.00372793	2529	38517452	0.00656585	2363	28642163	0.00825008	1829	26103837	0.00700663	1923	27161364	0.00707991	1126	22945505	0.00490728	1210	22183832	0.00545442	1737	26358245	0.00658997	1372	28730741	0.00477537	655	26223346	0.00249777	956	26962296	0.00354569	699	21374961	0.00327018	653	20608942	0.00316853	749	20367957	0.00367734	660
K07104 catechol 2,3-dioxygenase [EC:1.13.11.2]	0.00145033	0.000231988	0.000920094	0.000187219	0.000378763	0.00992253	0.000530239	0.000287561	0.000772917	608	38517452	0.00157851	495	28642163	0.00172822	422	26103837	0.00161662	469	27161364	0.00172672	307	22945505	0.00133795	303	22183832	0.00136586	301	26358245	0.00114196	318	28730741	0.00110683	309	26223346	0.00117834	295	26962296	0.00109412	171	21374961	0.000800001	140	20608942	0.000679317	147	20367957	0.000721722	136
K06999 phospholipase/carboxylesterase	0.00731611	0.00100795	0.0043732	0.00130094	0.000378405	0.00993622	0.00294291	0.00160094	0.00428487	2665	38517452	0.00691894	1617	28642163	0.00564552	2351	26103837	0.00900634	2233	27161364	0.00822124	1740	22945505	0.00758318	1422	22183832	0.00641007	2088	26358245	0.00792162	1960	28730741	0.00682196	1017	26223346	0.00387822	1035	26962296	0.00383869	954	21374961	0.00446317	748	20608942	0.00362949	729	20367957	0.00357915	484
K00990 [protein-PII] uridylyltransferase [EC:2.7.7.59]	0.0334748	0.00503471	0.0224768	0.00263965	0.00037815	0.00995267	0.0109981	0.00624586	0.0157503	10553	38517452	0.027398	7516	28642163	0.026241	10079	26103837	0.0386112	10182	27161364	0.0374871	9274	22945505	0.0404175	8025	22183832	0.036175	8238	26358245	0.031254	8681	28730741	0.030215	5680	26223346	0.0216601	5481	26962296	0.0203284	4838	21374961	0.022634	4214	20608942	0.0204474	4397	20367957	0.0215878	3534
K03337 5-deoxy-glucuronate isomerase [EC:5.3.1.30]	0.00633857	0.00120019	0.00899421	0.000830833	0.000381631	0.00997452	-0.00265564	-0.00385287	-0.00145842	2227	38517452	0.00578179	1707	28642163	0.00595975	1522	26103837	0.00583056	1496	27161364	0.00550782	1194	22945505	0.00520363	1366	22183832	0.00615764	2430	26358245	0.00921913	2025	28730741	0.0070482	2608	26223346	0.00994534	2615	26962296	0.00969873	2109	21374961	0.00986668	1722	20608942	0.0083556	1675	20367957	0.0082237	1366
K22336 bacterioferritin B [EC:1.16.3.1]	0.000891343	0.000281921	0.000273394	0.000129921	0.000383778	0.00998442	0.000617949	0.000355969	0.000879928	435	38517452	0.00112936	313	28642163	0.00109279	305	26103837	0.00116841	289	27161364	0.00106401	208	22945505	0.000906496	203	22183832	0.000915081	117	26358245	0.000443884	118	28730741	0.00041071	49	26223346	0.000186856	34	26962296	0.000126102	28	21374961	0.000130994	38	20608942	0.000184386	61	20367957	0.00029949	90
K06173 tRNA pseudouridine38-40 synthase [EC:5.4.99.12]	0.0400914	0.00157603	0.0435429	0.000994829	0.000383206	0.00999255	-0.00345145	-0.00498895	-0.00191394	15617	38517452	0.0405453	11635	28642163	0.0406219	9715	26103837	0.0372168	10809	27161364	0.0397955	9233	22945505	0.0402388	8659	22183832	0.0390329	10555	26358245	0.0400444	12422	28730741	0.0432359	11399	26223346	0.0434689	12087	26962296	0.0448293	9570	21374961	0.044772	8849	20608942	0.0429377	8657	20367957	0.042503	7626
K04090 indolepyruvate ferredoxin oxidoreductase [EC:1.2.7.8]	0.0107551	0.00371938	0.00257983	0.00161999	0.0003862	0.0100013	0.00817522	0.00473746	0.011613	2968	38517452	0.0077056	1918	28642163	0.00669642	4462	26103837	0.0170933	4522	27161364	0.0166486	2530	22945505	0.0110261	2020	22183832	0.00910573	2421	26358245	0.00918498	2465	28730741	0.00857966	306	26223346	0.0011669	316	26962296	0.00117201	228	21374961	0.00106667	353	20608942	0.00171285	584	20367957	0.00286725	405
K20025 (R)-2-hydroxyisocaproyl-CoA dehydratase alpha subunit [EC:4.2.1.157]	0.00439706	0.00102765	0.00206006	0.000819998	0.000385329	0.0100017	0.002337	0.00126628	0.00340772	2000	38517452	0.00519245	1663	28642163	0.00580613	1233	26103837	0.00472344	1167	27161364	0.00429654	888	22945505	0.00387004	843	22183832	0.00380006	1370	26358245	0.00519761	658	28730741	0.00229023	467	26223346	0.00178086	431	26962296	0.00159853	291	21374961	0.00136141	291	20608942	0.00141201	748	20367957	0.00367244	579
K03654 ATP-dependent DNA helicase RecQ [EC:3.6.4.12]	0.04671	0.00448281	0.036956	0.00231552	0.000390877	0.0100993	0.00975405	0.00553153	0.0139766	19295	38517452	0.0500942	14076	28642163	0.0491443	12419	26103837	0.0475754	12887	27161364	0.0474461	11453	22945505	0.0499139	10712	22183832	0.0482874	12085	26358245	0.045849	10162	28730741	0.0353698	10475	26223346	0.0399453	10132	26962296	0.0375784	7680	21374961	0.0359299	7797	20608942	0.0378331	8080	20367957	0.0396702	6756
K02299 cytochrome o ubiquinol oxidase subunit III	0.000596145	0.000176928	0.000193596	0.000142511	0.000392238	0.0101113	0.000402549	0.000217594	0.000587505	209	38517452	0.000542611	126	28642163	0.000439911	240	26103837	0.000919405	186	27161364	0.000684796	163	22945505	0.000710379	137	22183832	0.000617567	150	26358245	0.000569082	82	28730741	0.000285409	49	26223346	0.000186856	8	26962296	2.96711e-05	8	21374961	3.7427e-05	0	20608942	0	54	20367957	0.000265122	58
K21196 2-amino-1-hydroxyethylphosphonate dioxygenase (glycine-forming) [EC:1.13.11.78]	0.000271894	0.000107267	3.48312e-05	4.17553e-05	0.0003949	0.0101337	0.000237063	0.000138766	0.00033536	114	38517452	0.00029597	76	28642163	0.000265343	101	26103837	0.000386916	98	27161364	0.000360807	76	22945505	0.00033122	76	22183832	0.000342592	25	26358245	9.4847e-05	28	28730741	9.74566e-05	0	26223346	0	0	26962296	0	6	21374961	2.80702e-05	3	20608942	1.45568e-05	20	20367957	9.81935e-05	20
K08226 MFS transporter, BCD family, chlorophyll transporter	0.00432065	0.000954997	0.00222706	0.000632907	0.000394102	0.0101362	0.00209359	0.00115143	0.00303574	1885	38517452	0.00489389	1241	28642163	0.00433277	1389	26103837	0.00532106	1642	27161364	0.00604535	869	22945505	0.00378723	738	22183832	0.00332675	971	26358245	0.00368386	912	28730741	0.0031743	655	26223346	0.00249777	520	26962296	0.00192862	396	21374961	0.00185263	355	20608942	0.00172255	407	20367957	0.00199824	255
K16165 fumarylpyruvate hydrolase [EC:3.7.1.20]	0.00152242	0.000497649	0.000434398	0.000221776	0.000397179	0.0101691	0.00108802	0.000627091	0.00154895	842	38517452	0.00218602	488	28642163	0.00170378	559	26103837	0.00214145	498	27161364	0.00183349	337	22945505	0.0014687	242	22183832	0.00109088	247	26358245	0.000937088	235	28730741	0.000817939	87	26223346	0.000331765	63	26962296	0.00023366	38	21374961	0.000177778	34	20608942	0.000164977	129	20367957	0.000633348	102
K02990 small subunit ribosomal protein S6	0.020711	0.00120119	0.0233436	0.000509824	0.000399786	0.0101896	-0.00263258	-0.00374037	-0.00152479	7854	38517452	0.0203908	5693	28642163	0.0198763	4971	26103837	0.0190432	5407	27161364	0.019907	4953	22945505	0.0215859	4435	22183832	0.019992	5934	26358245	0.0225129	6430	28730741	0.0223802	6099	26223346	0.0232579	6285	26962296	0.0233103	5108	21374961	0.0238971	4862	20608942	0.0235917	4591	20367957	0.0225403	4101
K02485 two-component system, response regulator	0.0313849	0.00459637	0.0453162	0.00627083	0.000399283	0.0101998	-0.0139313	-0.0202881	-0.00757448	10295	38517452	0.0267281	7354	28642163	0.0256754	7733	26103837	0.029624	7854	27161364	0.0289161	7042	22945505	0.0306901	7150	22183832	0.0322307	10192	26358245	0.0386672	11075	28730741	0.0385476	13059	26223346	0.0497991	13894	26962296	0.0515312	9304	21374961	0.0435276	11565	20608942	0.0561164	8198	20367957	0.0402495	6449
K19092 toxin ParE1/3/4	0.00734897	0.00117278	0.00475065	0.000853137	0.000403819	0.0102461	0.00259832	0.00141212	0.00378452	2941	38517452	0.0076355	1922	28642163	0.00671039	1963	26103837	0.00751997	2050	27161364	0.00754749	2156	22945505	0.00939618	1758	22183832	0.00792469	1880	26358245	0.00713249	1415	28730741	0.00492504	1270	26223346	0.00484301	1126	26962296	0.0041762	823	21374961	0.0038503	812	20608942	0.00394004	1054	20367957	0.00517479	1203
K19877 chitin biosynthesis protein CHS5	0.00062768	0.000234374	0.000110438	8.94269e-05	0.000403507	0.0102613	0.000517242	0.000302743	0.000731742	131	38517452	0.000340106	149	28642163	0.000520212	230	26103837	0.000881097	229	27161364	0.000843109	190	22945505	0.000828049	105	22183832	0.000473318	225	26358245	0.000853623	81	28730741	0.000281928	13	26223346	4.95741e-05	15	26962296	5.56332e-05	0	21374961	0	0	20608942	0	38	20367957	0.000186568	40
K05807 outer membrane protein assembly factor BamD	0.0163584	0.0015034	0.0129858	0.00116321	0.00040535	0.0102619	0.00337261	0.00182251	0.00492271	6063	38517452	0.0157409	4650	28642163	0.0162348	4411	26103837	0.0168979	4641	27161364	0.0170868	3982	22945505	0.0173542	4220	22183832	0.0190229	3743	26358245	0.0142005	4117	28730741	0.0143296	3075	26223346	0.0117262	3254	26962296	0.0120687	2547	21374961	0.0119158	2422	20608942	0.0117522	2975	20367957	0.0146063	2516
K10536 agmatine deiminase [EC:3.5.3.12]	0.00976037	0.00120975	0.00674276	0.00124011	0.000406525	0.0102686	0.00301761	0.00161312	0.0044221	3371	38517452	0.00875188	2318	28642163	0.00809296	3114	26103837	0.0119293	2575	27161364	0.00948038	2574	22945505	0.0112179	2099	22183832	0.00946185	2695	26358245	0.0102245	2564	28730741	0.00892424	1580	26223346	0.00602517	1698	26962296	0.00629768	1351	21374961	0.00632048	1257	20608942	0.00609929	1293	20367957	0.00634821	982
K01867 tryptophanyl-tRNA synthetase [EC:6.1.1.2]	0.0551506	0.00236484	0.0602801	0.0014702	0.000410689	0.0103276	-0.00512955	-0.00742907	-0.00283004	21813	38517452	0.0566315	16021	28642163	0.055935	13930	26103837	0.0533638	14670	27161364	0.0540105	12297	22945505	0.0535922	11487	22183832	0.051781	14745	26358245	0.0559408	17224	28730741	0.0599497	15840	26223346	0.0604042	16443	26962296	0.0609852	13019	21374961	0.0609077	12988	20608942	0.0630212	12005	20367957	0.0589406	10400
K21172 enediyne biosynthesis protein CalE5	0.00102652	0.000366512	0.000232269	0.000223765	0.000410093	0.0103356	0.000794254	0.000439199	0.00114931	327	38517452	0.000848966	188	28642163	0.000656375	431	26103837	0.0016511	414	27161364	0.00152422	283	22945505	0.00123336	195	22183832	0.000879019	197	26358245	0.000747394	193	28730741	0.000671754	37	26223346	0.000141096	9	26962296	3.33799e-05	77	21374961	0.000360235	37	20608942	0.000179534	0	20367957	0	4
K15269 probable blue pigment (indigoidine) exporter	0.00558515	0.000936298	0.00334837	0.000880441	0.000412799	0.0103576	0.00223678	0.00119453	0.00327903	2441	38517452	0.00633739	1623	28642163	0.00566647	1777	26103837	0.00680743	1633	27161364	0.00601222	1436	22945505	0.00625831	1116	22183832	0.00503069	1276	26358245	0.00484099	1071	28730741	0.00372771	985	26223346	0.00375619	872	26962296	0.00323415	320	21374961	0.00149708	514	20608942	0.00249406	807	20367957	0.00396211	668
K00389 putative membrane protein	0.00348593	0.000968828	0.00135479	0.000689836	0.000415674	0.0104066	0.00213114	0.00115723	0.00310504	1388	38517452	0.00360356	1031	28642163	0.00359959	1227	26103837	0.00470046	1035	27161364	0.00381056	964	22945505	0.00420126	920	22183832	0.00414716	510	26358245	0.00193488	543	28730741	0.00188996	171	26223346	0.000652091	191	26962296	0.000708397	141	21374961	0.00065965	184	20608942	0.000892816	509	20367957	0.00249902	401
K00246 fumarate reductase subunit C	0.00170714	0.000647032	0.000290519	0.000254925	0.000419303	0.0104742	0.00141662	0.000823222	0.00201002	783	38517452	0.00203284	513	28642163	0.00179107	722	26103837	0.00276588	557	27161364	0.00205071	464	22945505	0.00202218	330	22183832	0.00148757	166	26358245	0.000629784	252	28730741	0.000877109	12	26223346	4.57608e-05	42	26962296	0.000155773	8	21374961	3.7427e-05	9	20608942	4.36704e-05	142	20367957	0.000697174	61
K00450 gentisate 1,2-dioxygenase [EC:1.13.11.4]	0.00137205	0.000296351	0.000733759	0.000178384	0.000428185	0.0106023	0.000638296	0.000352019	0.000924573	524	38517452	0.00136042	315	28642163	0.00109978	497	26103837	0.00190393	446	27161364	0.00164204	297	22945505	0.00129437	273	22183832	0.00123063	406	26358245	0.00154031	260	28730741	0.000904954	207	26223346	0.000789373	166	26962296	0.000615675	85	21374961	0.000397662	190	20608942	0.00092193	132	20367957	0.000648077	117
K13277 minor extracellular protease Epr [EC:3.4.21.-]	0.00473845	0.00124521	0.00204725	0.000570387	0.000427328	0.0106043	0.0026912	0.00153478	0.00384762	2329	38517452	0.00604661	1348	28642163	0.00470635	1619	26103837	0.00620215	1360	27161364	0.00500711	1024	22945505	0.00446275	1284	22183832	0.005788	679	26358245	0.00257604	896	28730741	0.00311861	527	26223346	0.00200966	386	26962296	0.00143163	314	21374961	0.00146901	425	20608942	0.00206221	652	20367957	0.00320111	370
K00376 nitrous-oxide reductase [EC:1.7.2.4]	0.0024206	0.00089184	0.000502793	0.000508095	0.000427277	0.0106264	0.0019178	0.00106497	0.00277064	586	38517452	0.00152139	382	28642163	0.0013337	951	26103837	0.00364314	924	27161364	0.00340189	468	22945505	0.00203962	353	22183832	0.00159125	912	26358245	0.00346002	682	28730741	0.00237376	54	26223346	0.000205923	46	26962296	0.000170609	29	21374961	0.000135673	24	20608942	0.000116454	78	20367957	0.000382954	48
K07093 uncharacterized protein	0.01124	0.002477	0.00500044	0.00261265	0.000427102	0.0106455	0.00623959	0.0033203	0.00915888	3428	38517452	0.00889986	2203	28642163	0.00769146	4019	26103837	0.0153962	3659	27161364	0.0134713	3020	22945505	0.0131616	2454	22183832	0.0110621	2371	26358245	0.00899529	3230	28730741	0.0112423	914	26223346	0.00348544	1024	26962296	0.0037979	650	21374961	0.00304094	659	20608942	0.00319764	858	20367957	0.0042125	599
K22131 2-dehydrotetronate isomerase [EC:5.3.1.35]	0.00147561	0.000474556	0.000416768	0.000370591	0.000432689	0.010667	0.00105885	0.000568037	0.00154965	512	38517452	0.00132927	311	28642163	0.00108581	557	26103837	0.00213379	604	27161364	0.00222375	400	22945505	0.00174326	309	22183832	0.00139291	253	26358245	0.000959851	269	28730741	0.000936279	41	26223346	0.000156349	70	26962296	0.000259622	40	21374961	0.000187135	74	20608942	0.000359067	38	20367957	0.000186568	35
K21310 methanethiol S-methyltransferase [EC:2.1.1.334]	0.00950461	0.00194448	0.00508469	0.000438977	0.000431882	0.0106704	0.00441993	0.00267111	0.00616874	2947	38517452	0.00765108	2119	28642163	0.00739818	2812	26103837	0.0107724	3222	27161364	0.0118624	2510	22945505	0.010939	2362	22183832	0.0106474	2779	26358245	0.0105432	1788	28730741	0.0062233	1274	26223346	0.00485827	1321	26962296	0.00489943	1000	21374961	0.00467837	944	20608942	0.00458054	1132	20367957	0.00555775	1069
K22186 xylonate dehydratase [EC:4.2.1.82]	0.0019286	0.000634272	0.000487206	0.000131285	0.000446131	0.0107176	0.0014414	0.000871624	0.00201117	735	38517452	0.00190823	446	28642163	0.00155714	784	26103837	0.00300339	723	27161364	0.00266187	526	22945505	0.00229239	374	22183832	0.00168591	328	26358245	0.00124439	309	28730741	0.0010755	145	26223346	0.000552942	145	26962296	0.000537788	55	21374961	0.00025731	78	20608942	0.000378476	134	20367957	0.000657896	63
K09701 uncharacterized protein	0.00464545	0.00150262	0.00143958	0.000810283	0.000452827	0.0107188	0.00320587	0.00178171	0.00463004	1465	38517452	0.00380347	900	28642163	0.00314222	1701	26103837	0.00651628	1671	27161364	0.00615212	1423	22945505	0.00620165	1215	22183832	0.00547696	886	26358245	0.00336138	721	28730741	0.00250951	186	26223346	0.000709292	215	26962296	0.00079741	128	21374961	0.000598832	112	20608942	0.000543453	486	20367957	0.0023861	476
K11744 AI-2 transport protein TqsA	0.0159361	0.00189708	0.0114413	0.00179105	0.000450326	0.0107271	0.00449483	0.0023792	0.00661047	6859	38517452	0.0178075	5025	28642163	0.0175441	4776	26103837	0.0182962	4727	27161364	0.0174034	3379	22945505	0.0147262	3035	22183832	0.0136811	3503	26358245	0.01329	4235	28730741	0.0147403	2847	26223346	0.0108567	2703	26962296	0.0100251	1940	21374961	0.00907604	2001	20608942	0.00970938	2747	20367957	0.0134869	2273
K01075 4-hydroxybenzoyl-CoA thioesterase [EC:3.1.2.23]	0.0023567	0.00069534	0.000866354	0.000363514	0.000438126	0.0107308	0.00149034	0.000834285	0.0021464	610	38517452	0.0015837	472	28642163	0.00164792	722	26103837	0.00276588	774	27161364	0.00284964	771	22945505	0.00336014	646	22183832	0.00291203	632	26358245	0.00239773	384	28730741	0.00133655	119	26223346	0.000453794	170	26962296	0.00063051	110	21374961	0.000514621	92	20608942	0.000446408	243	20367957	0.00119305	223
K03046 DNA-directed RNA polymerase subunit beta' [EC:2.7.7.6]	0.216765	0.00960624	0.237374	0.00454389	0.000445817	0.0107329	-0.0206094	-0.0295608	-0.011658	84413	38517452	0.219155	64592	28642163	0.225514	52802	26103837	0.202277	55663	27161364	0.204934	49731	22945505	0.216735	47541	22183832	0.214305	57228	26358245	0.217116	67254	28730741	0.234084	61606	26223346	0.234928	63554	26962296	0.235714	50980	21374961	0.238503	49751	20608942	0.241405	47723	20367957	0.234304	44603
K01584 arginine decarboxylase [EC:4.1.1.19]	0.00778823	0.00258066	0.0022355	0.00107095	0.000462011	0.0107337	0.00555273	0.00317702	0.00792844	3795	38517452	0.00985268	2963	28642163	0.0103449	2438	26103837	0.00933962	2272	27161364	0.00836482	2162	22945505	0.00942232	1757	22183832	0.00792018	764	26358245	0.00289852	1196	28730741	0.00416279	284	26223346	0.001083	320	26962296	0.00118684	351	21374961	0.00164211	218	20608942	0.00105779	809	20367957	0.00397193	619
K04046 hypothetical chaperone protein	0.00237196	0.000657942	0.000967949	0.000348518	0.000452548	0.0107347	0.00140401	0.000782071	0.00202595	1344	38517452	0.00348933	822	28642163	0.00286989	680	26103837	0.00260498	711	27161364	0.00261769	435	22945505	0.0018958	310	22183832	0.00139741	668	26358245	0.00253431	450	28730741	0.00156627	380	26223346	0.00144909	371	26962296	0.001376	155	21374961	0.000725148	130	20608942	0.000630794	115	20367957	0.000564612	112
K04882 potassium voltage-gated channel Shaker-related subfamily A, beta member 1	0.00106594	0.000318588	0.00036011	0.000248005	0.000456464	0.0107374	0.000705833	0.000376683	0.00103498	415	38517452	0.00107743	290	28642163	0.00101249	151	26103837	0.000578459	436	27161364	0.00160522	214	22945505	0.000932645	197	22183832	0.000888034	401	26358245	0.00152135	262	28730741	0.000911915	224	26223346	0.000854201	167	26962296	0.000619383	39	21374961	0.000182456	27	20608942	0.000131011	40	20367957	0.000196387	46
K03410 chemotaxis protein CheC	0.00239619	0.000576084	0.00108575	0.000483959	0.000437492	0.0107385	0.00131044	0.000698806	0.00192207	670	38517452	0.00173947	691	28642163	0.00241253	860	26103837	0.00329453	783	27161364	0.00288277	595	22945505	0.0025931	554	22183832	0.00249731	637	26358245	0.0024167	383	28730741	0.00133307	189	26223346	0.000720732	206	26962296	0.00076403	188	21374961	0.000879534	166	20608942	0.000805476	367	20367957	0.00180185	350
K04518 prephenate dehydratase [EC:4.2.1.51]	0.0119778	0.00185488	0.0159547	0.00113831	0.00044798	0.0107391	-0.00397696	-0.00577575	-0.00217818	4224	38517452	0.0109665	3048	28642163	0.0106417	2471	26103837	0.00946604	2663	27161364	0.00980437	3322	22945505	0.0144778	2886	22183832	0.0130095	3527	26358245	0.013381	4044	28730741	0.0140755	4255	26223346	0.016226	4702	26962296	0.0174392	3681	21374961	0.0172211	2999	20608942	0.0145519	2998	20367957	0.0147192	3095
K03702 excinuclease ABC subunit B	0.0974112	0.00515089	0.108801	0.00152309	0.000458494	0.0107404	-0.0113903	-0.0160507	-0.00672989	38252	38517452	0.0993108	28307	28642163	0.0988298	24405	26103837	0.093492	24895	27161364	0.0916559	22051	22945505	0.0961016	20401	22183832	0.0919634	26214	26358245	0.0994528	31168	28730741	0.108483	28663	26223346	0.109303	29867	26962296	0.110773	23117	21374961	0.10815	22426	20608942	0.108817	21471	20367957	0.105416	19581
K03575 A/G-specific adenine glycosylase [EC:3.2.2.31]	0.0271375	0.00370772	0.0191162	0.00150112	0.000450008	0.0107422	0.00802127	0.00461436	0.0114282	10670	38517452	0.0277017	7957	28642163	0.0277807	8655	26103837	0.033156	8220	27161364	0.0302636	6487	22945505	0.0282713	5935	22183832	0.0267537	5609	26358245	0.0212799	6290	28730741	0.0218929	4585	26223346	0.0174844	4571	26962296	0.0169533	3832	21374961	0.0179275	3836	20608942	0.0186133	4153	20367957	0.0203899	3524
K09004 uncharacterized protein	0.00115976	0.000433665	0.000230563	0.000198396	0.000455718	0.0107422	0.000929202	0.00052651	0.00133189	466	38517452	0.00120984	282	28642163	0.000984563	482	26103837	0.00184647	411	27161364	0.00151318	346	22945505	0.00150792	235	22183832	0.00105933	104	26358245	0.000394563	219	28730741	0.00076225	19	26223346	7.24545e-05	36	26962296	0.00013352	23	21374961	0.000107603	10	20608942	4.85226e-05	50	20367957	0.000245484	24
K01153 type I restriction enzyme, R subunit [EC:3.1.21.3]	0.140611	0.00408251	0.121965	0.00870369	0.000451924	0.0107425	0.0186464	0.0105434	0.0267494	54792	38517452	0.142252	40202	28642163	0.14036	36487	26103837	0.139776	38706	27161364	0.142504	31246	22945505	0.136175	32507	22183832	0.146535	38033	26358245	0.144293	38211	28730741	0.132997	30762	26223346	0.117308	31161	26962296	0.115573	24451	21374961	0.114391	22433	20608942	0.108851	26546	20367957	0.130332	22270
K07089 uncharacterized protein	0.0545967	0.00382005	0.0627816	0.00173	0.000457653	0.0107429	-0.00818495	-0.0117286	-0.0046413	19797	38517452	0.0513975	15133	28642163	0.0528347	14296	26103837	0.0547659	14912	27161364	0.0549015	11402	22945505	0.0496916	11959	22183832	0.0539086	14734	26358245	0.055899	18208	28730741	0.0633746	16167	26223346	0.0616512	16683	26962296	0.0618753	13472	21374961	0.063027	13616	20608942	0.0660684	12182	20367957	0.0598096	11253
K03215 23S rRNA (uracil1939-C5)-methyltransferase [EC:2.1.1.190]	0.0374186	0.00337407	0.0301533	0.00216902	0.000445307	0.0107435	0.00726531	0.00396032	0.0105703	15306	38517452	0.0397378	11417	28642163	0.0398608	11054	26103837	0.0423463	10995	27161364	0.0404803	8099	22945505	0.0352967	7853	22183832	0.0353997	8851	26358245	0.0335796	9380	28730741	0.032648	7853	26223346	0.0299466	8010	26962296	0.0297082	6246	21374961	0.0292211	5300	20608942	0.025717	6515	20367957	0.0319865	5431
K03856 3-deoxy-7-phosphoheptulonate synthase [EC:2.5.1.54]	0.0401111	0.00598956	0.0528922	0.00357594	0.000459749	0.0107475	-0.0127812	-0.0185579	-0.00700441	16205	38517452	0.0420718	12417	28642163	0.0433522	8128	26103837	0.0311372	9377	27161364	0.0345233	8790	22945505	0.0383082	7925	22183832	0.0357242	11842	26358245	0.0449271	14608	28730741	0.0508445	14187	26223346	0.0541006	14464	26962296	0.0536453	11996	21374961	0.0561217	12019	20608942	0.0583193	9271	20367957	0.0455176	9121
K00635 diacylglycerol O-acyltransferase / wax synthase [EC:2.3.1.20 2.3.1.75]	0.0333246	0.0124679	0.00619771	0.0044886	0.000460733	0.0107482	0.0271269	0.0157543	0.0384995	7193	38517452	0.0186747	4493	28642163	0.0156867	12877	26103837	0.0493299	12282	27161364	0.0452186	10426	22945505	0.0454381	8029	22183832	0.036193	9335	26358245	0.0354159	5930	28730741	0.0206399	538	26223346	0.00205161	587	26962296	0.00217711	403	21374961	0.00188538	324	20608942	0.00157213	1885	20367957	0.00925473	1440
K06182 23S rRNA pseudouridine2604 synthase [EC:5.4.99.21]	0.0012251	0.000466934	0.000167741	0.00010877	0.000437182	0.0107543	0.00105736	0.000637208	0.00147752	531	38517452	0.0013786	358	28642163	0.00124991	493	26103837	0.00188861	451	27161364	0.00166045	358	22945505	0.00156022	213	22183832	0.000960159	143	26358245	0.000542525	161	28730741	0.000560375	6	26223346	2.28804e-05	15	26962296	5.56332e-05	37	21374961	0.0001731	9	20608942	4.36704e-05	49	20367957	0.000240574	34
K02259 cytochrome c oxidase assembly protein subunit 15	0.00668336	0.00176446	0.0029056	0.0010322	0.000444804	0.0107543	0.00377776	0.00208249	0.00547303	2277	38517452	0.00591161	1552	28642163	0.00541859	2588	26103837	0.00991425	2340	27161364	0.00861518	1813	22945505	0.00790133	1290	22183832	0.00581505	1208	26358245	0.00458301	1525	28730741	0.0053079	634	26223346	0.00241769	589	26962296	0.00218453	549	21374961	0.00256843	471	20608942	0.00228542	540	20367957	0.00265122	333
K07332 archaeal flagellar protein FlaI	0.00712895	0.000917319	0.00992306	0.00127698	0.000440081	0.0107553	-0.00279411	-0.004081	-0.00150721	2495	38517452	0.00647758	1982	28642163	0.00691987	1430	26103837	0.00547812	1992	27161364	0.00733395	1600	22945505	0.00697304	1833	22183832	0.00826277	2267	26358245	0.00860072	2007	28730741	0.00698555	3052	26223346	0.0116385	3101	26962296	0.0115012	2233	21374961	0.0104468	2187	20608942	0.0106119	1892	20367957	0.0092891	1688
K19736 TetR/AcrR family transcriptional regulator, regulator of autoinduction and epiphytic fitness	0.00444954	0.000979462	0.00235157	0.000624508	0.000462001	0.0107556	0.00209798	0.00114033	0.00305562	2343	38517452	0.00608296	1248	28642163	0.00435721	1360	26103837	0.00520996	1398	27161364	0.00514702	1018	22945505	0.0044366	813	22183832	0.00366483	1059	26358245	0.00401772	770	28730741	0.00268006	676	26223346	0.00257786	609	26962296	0.00225871	326	21374961	0.00152515	391	20608942	0.00189723	340	20367957	0.00166929	435
K01400 bacillolysin [EC:3.4.24.28]	0.0122242	0.00262156	0.00633655	0.00213406	0.000449873	0.0107617	0.00588766	0.00313674	0.00863858	4073	38517452	0.0105744	2916	28642163	0.0101808	4234	26103837	0.0162198	4261	27161364	0.0156877	2715	22945505	0.0118324	3180	22183832	0.0143348	2371	26358245	0.00899529	2864	28730741	0.00996842	1814	26223346	0.0069175	1287	26962296	0.00477333	970	21374961	0.00453802	991	20608942	0.00480859	1250	20367957	0.00613709	743
K01455 formamidase [EC:3.5.1.49]	0.00379853	0.000470776	0.00243138	0.000620723	0.000455671	0.0107636	0.00136716	0.000731276	0.00200303	1506	38517452	0.00390992	976	28642163	0.00340756	982	26103837	0.0037619	1074	27161364	0.00395415	1112	22945505	0.00484627	862	22183832	0.00388571	864	26358245	0.00327791	961	28730741	0.00334485	718	26223346	0.00273802	644	26962296	0.00238852	331	21374961	0.00154854	444	20608942	0.0021544	410	20367957	0.00201297	350
K03621 phosphate acyltransferase [EC:2.3.1.274]	0.0467681	0.00388577	0.0551102	0.00182776	0.000444533	0.0107709	-0.00834205	-0.0119607	-0.00472336	18388	38517452	0.0477394	13650	28642163	0.047657	10607	26103837	0.0406339	11285	27161364	0.041548	10463	22945505	0.0455993	10549	22183832	0.0475527	13285	26358245	0.0504017	15231	28730741	0.0530129	13939	26223346	0.0531549	14290	26962296	0.0529999	11885	21374961	0.0556024	11500	20608942	0.055801	11061	20367957	0.0543059	10686
K00799 glutathione S-transferase [EC:2.5.1.18]	0.025025	0.00736542	0.00831296	0.00634424	0.00048005	0.0107758	0.016712	0.00881537	0.0246087	6249	38517452	0.0162238	4369	28642163	0.0152537	9558	26103837	0.0366153	9535	27161364	0.035105	5515	22945505	0.0240352	4534	22183832	0.0204383	6953	26358245	0.0263788	7513	28730741	0.0261497	1420	26223346	0.00541502	1557	26962296	0.00577473	912	21374961	0.00426667	808	20608942	0.00392063	1044	20367957	0.0051257	642
K05834 homoserine/homoserine lactone efflux protein	0.00337589	0.0011161	0.000866034	0.000279426	0.000443921	0.0107792	0.00250986	0.00150426	0.00351546	1182	38517452	0.00306874	825	28642163	0.00288037	1381	26103837	0.00529041	1249	27161364	0.00459844	916	22945505	0.00399207	726	22183832	0.00327265	542	26358245	0.00205628	531	28730741	0.00184819	169	26223346	0.000644464	183	26962296	0.000678726	146	21374961	0.000683042	124	20608942	0.000601681	294	20367957	0.00144344	132
K01876 aspartyl-tRNA synthetase [EC:6.1.1.12]	0.0897089	0.00344247	0.0971707	0.00139883	0.000442993	0.0107798	-0.0074618	-0.0106258	-0.00429778	34355	38517452	0.0891933	26051	28642163	0.0909533	21946	26103837	0.0840719	23650	27161364	0.0870722	20447	22945505	0.0891111	19790	22183832	0.0892091	24032	26358245	0.0911745	27836	28730741	0.0968858	25294	26223346	0.096456	26242	26962296	0.0973285	20774	21374961	0.0971885	19846	20608942	0.096298	19645	20367957	0.0964505	18158
K05367 penicillin-binding protein 1C [EC:2.4.1.129]	0.0352701	0.00277906	0.0288384	0.00246352	0.000442364	0.0107878	0.00643166	0.00341701	0.0094463	15633	38517452	0.0405868	10891	28642163	0.0380244	8937	26103837	0.0342363	9832	27161364	0.0361985	7523	22945505	0.0327864	7275	22183832	0.0327942	9400	26358245	0.0356625	9157	28730741	0.0318718	7558	26223346	0.0288216	8453	26962296	0.0313512	5334	21374961	0.0249544	5690	20608942	0.0276094	5739	20367957	0.0281766	4827
K10221 2-pyrone-4,6-dicarboxylate lactonase [EC:3.1.1.57]	0.000733398	0.000128218	0.000287427	0.000209014	0.000465645	0.0107959	0.000445971	0.000243294	0.000648648	210	38517452	0.000545207	254	28642163	0.000886805	223	26103837	0.000854281	226	27161364	0.000832064	127	22945505	0.000553485	179	22183832	0.000806894	199	26358245	0.000754982	182	28730741	0.000633468	84	26223346	0.000320325	64	26962296	0.000237369	20	21374961	9.35674e-05	17	20608942	8.24885e-05	24	20367957	0.000117832	41
K10534 nitrate reductase (NAD(P)H) [EC:1.7.1.1 1.7.1.2 1.7.1.3]	0.00157543	0.000212722	0.00247984	0.000426593	0.000480022	0.0107967	-0.000904404	-0.00130438	-0.000504426	630	38517452	0.00163562	524	28642163	0.00182947	338	26103837	0.00129483	383	27161364	0.00141009	393	22945505	0.00171275	381	22183832	0.00171747	465	26358245	0.00176415	356	28730741	0.00123909	732	26223346	0.00279141	600	26962296	0.00222533	530	21374961	0.00247954	444	20608942	0.0021544	574	20367957	0.00281815	539
K18778 cell division protein ZapD	0.00172821	0.000689748	0.000248292	0.00027634	0.000479878	0.010815	0.00147992	0.000846612	0.00211323	631	38517452	0.00163822	496	28642163	0.00173171	702	26103837	0.00268926	627	27161364	0.00230843	525	22945505	0.00228803	403	22183832	0.00181664	165	26358245	0.00062599	209	28730741	0.000727444	0	26223346	0	10	26962296	3.70888e-05	0	21374961	0	7	20608942	3.39658e-05	62	20367957	0.0003044	41
K11071 spermidine/putrescine transport system permease protein	0.0116918	0.00207755	0.00728271	0.00101146	0.000479114	0.0108194	0.00440912	0.00246684	0.00635139	4917	38517452	0.0127656	3677	28642163	0.0128377	3902	26103837	0.014948	3629	27161364	0.0133609	2672	22945505	0.011645	2265	22183832	0.0102101	2185	26358245	0.00828963	2723	28730741	0.00947765	1894	26223346	0.00722257	1944	26962296	0.00721007	1411	21374961	0.00660118	1172	20608942	0.00568685	1448	20367957	0.00710921	1219
K21345 D-glycero-beta-D-manno-heptose 1-phosphate adenylyltransferase [EC:2.7.7.70]	0.000669481	0.000242449	0.00014544	8.86329e-05	0.000478279	0.0108221	0.000524041	0.000302709	0.000745374	207	38517452	0.000537419	174	28642163	0.000607496	292	26103837	0.00111861	226	27161364	0.000832064	200	22945505	0.00087163	141	22183832	0.000635598	115	26358245	0.000436296	91	28730741	0.000316734	13	26223346	4.95741e-05	14	26962296	5.19244e-05	37	21374961	0.0001731	18	20608942	8.73407e-05	54	20367957	0.000265122	13
K00937 polyphosphate kinase [EC:2.7.4.1]	0.0359485	0.00841126	0.0173275	0.0023493	0.000468036	0.0108291	0.018621	0.0110233	0.0262187	15530	38517452	0.0403194	10738	28642163	0.0374902	12569	26103837	0.04815	11746	27161364	0.0432453	9171	22945505	0.0399686	6882	22183832	0.0310226	6001	26358245	0.0227671	7075	28730741	0.0246252	4263	26223346	0.0162565	4118	26962296	0.0152732	2881	21374961	0.0134784	3346	20608942	0.0162357	4054	20367957	0.0199038	3135
K15228 methylamine dehydrogenase light chain [EC:1.4.9.1]	0.00047101	0.00019889	4.89842e-05	9.1212e-05	0.000489144	0.0108293	0.000422025	0.000237295	0.000606756	78	38517452	0.000202506	64	28642163	0.000223447	191	26103837	0.000731693	176	27161364	0.000647979	79	22945505	0.000344294	97	22183832	0.000437255	192	26358245	0.000728425	130	28730741	0.000452477	0	26223346	0	0	26962296	0	0	21374961	0	0	20608942	0	4	20367957	1.96387e-05	0
K02257 heme o synthase [EC:2.5.1.141]	0.0177261	0.000919224	0.0155543	0.000878515	0.00048368	0.0108358	0.00217183	0.00114087	0.00320279	7020	38517452	0.0182255	5324	28642163	0.018588	4551	26103837	0.0174342	4819	27161364	0.0177421	4462	22945505	0.0194461	3713	22183832	0.0167374	4375	26358245	0.0165982	4895	28730741	0.0170375	3699	26223346	0.0141058	4092	26962296	0.0151767	3161	21374961	0.0147883	3284	20608942	0.0159348	3101	20367957	0.0152249	2817
K07447 putative holliday junction resolvase [EC:3.1.-.-]	0.0218096	0.00103011	0.0239934	0.00047755	0.000490426	0.0108364	-0.00218386	-0.00314169	-0.00122602	7941	38517452	0.0206166	6023	28642163	0.0210284	5462	26103837	0.0209241	5817	27161364	0.0214165	5306	22945505	0.0231244	4955	22183832	0.0223361	5639	26358245	0.0213937	6791	28730741	0.0236367	6141	26223346	0.0234181	6277	26962296	0.0232807	5217	21374961	0.0244071	4847	20608942	0.0235189	4948	20367957	0.0242931	4341
K06988 8-hydroxy-5-deazaflavin	0.00685706	0.00078454	0.00475497	0.000933645	0.000478111	0.0108401	0.0021021	0.00111074	0.00309345	2932	38517452	0.00761213	1896	28642163	0.00661961	2028	26103837	0.00776897	2158	27161364	0.00794511	1302	22945505	0.00567431	1348	22183832	0.0060765	1799	26358245	0.00682519	1820	28730741	0.00633468	1512	26223346	0.00576585	1407	26962296	0.0052184	891	21374961	0.00416843	774	20608942	0.00375565	796	20367957	0.0039081	656
K01512 acylphosphatase [EC:3.6.1.7]	0.0155897	0.00092169	0.0176998	0.000818216	0.000487889	0.010844	-0.00211012	-0.00311055	-0.00110969	5896	38517452	0.0153073	4201	28642163	0.0146672	3652	26103837	0.0139903	4163	27161364	0.0153269	3709	22945505	0.0161644	3617	22183832	0.0163047	4175	26358245	0.0158394	4918	28730741	0.0171176	4396	26223346	0.0167637	4959	26962296	0.0183924	3886	21374961	0.0181802	3438	20608942	0.0166821	3456	20367957	0.0169678	3199
K07064 uncharacterized protein	0.028957	0.00480031	0.0185207	0.00354598	0.00048502	0.0108443	0.0104363	0.0055588	0.0153138	11244	38517452	0.029192	7896	28642163	0.0275678	8285	26103837	0.0317386	8864	27161364	0.0326346	7683	22945505	0.0334837	7505	22183832	0.0338309	6245	26358245	0.0236928	5607	28730741	0.0195157	4165	26223346	0.0158828	4296	26962296	0.0159334	3103	21374961	0.014517	3054	20608942	0.0148188	4966	20367957	0.0243814	4134
K07071 uncharacterized protein	0.0197469	0.00381331	0.0112387	0.000850126	0.000488899	0.0108451	0.00850812	0.00507918	0.0119371	8928	38517452	0.0231791	5998	28642163	0.0209412	6258	26103837	0.0239735	5963	27161364	0.021954	4895	22945505	0.0213332	4212	22183832	0.0189868	4119	26358245	0.015627	3442	28730741	0.0119802	2843	26223346	0.0108415	2928	26962296	0.0108596	2153	21374961	0.0100725	2117	20608942	0.0102722	2609	20367957	0.0128093	2079
K10941 sigma-54 dependent transcriptional regulator, flagellar regulatory protein	0.00369174	0.000895831	0.00178791	0.000404937	0.000486255	0.0108504	0.00190384	0.00107298	0.0027347	1241	38517452	0.00322192	843	28642163	0.00294321	1371	26103837	0.0052521	1274	27161364	0.00469049	1015	22945505	0.00442352	746	22183832	0.00336281	782	26358245	0.00296681	768	28730741	0.00267309	384	26223346	0.00146434	392	26962296	0.00145388	383	21374961	0.00179182	244	20608942	0.00118395	510	20367957	0.00250393	406
K17899 D-ornithine 4,5-aminomutase subunit alpha [EC:5.4.3.5]	0.000311114	0.000117364	5.44917e-05	3.56984e-05	0.000487298	0.0108522	0.000256622	0.000150337	0.000362907	162	38517452	0.000420589	89	28642163	0.000310731	75	26103837	0.000287314	74	27161364	0.000272446	93	22945505	0.000405308	103	22183832	0.000464302	70	26358245	0.000265572	18	28730741	6.26507e-05	14	26223346	5.33875e-05	0	26962296	0	9	21374961	4.21053e-05	13	20608942	6.30794e-05	11	20367957	5.40064e-05	24
K18022 glyceraldehyde dehydrogenase small subunit [EC:1.2.99.8]	0.00120041	0.000367728	0.00211168	0.00038943	0.000501793	0.0108539	-0.000911274	-0.0013456	-0.000476945	392	38517452	0.00101772	376	28642163	0.00131275	172	26103837	0.000658907	212	27161364	0.00078052	235	22945505	0.00102417	376	22183832	0.00169493	375	26358245	0.0014227	486	28730741	0.00169157	560	26223346	0.0021355	712	26962296	0.00264072	457	21374961	0.00213802	526	20608942	0.00255229	464	20367957	0.00227809	343
K03713 MerR family transcriptional regulator, glutamine synthetase repressor	0.000904366	0.000268994	0.000319583	9.15283e-05	0.000477799	0.0108548	0.000584783	0.000340103	0.000829462	163	38517452	0.000423185	258	28642163	0.00090077	318	26103837	0.00121821	213	27161364	0.000784202	262	22945505	0.00114184	273	22183832	0.00123063	237	26358245	0.000899149	183	28730741	0.000636948	73	26223346	0.000278378	54	26962296	0.00020028	82	21374961	0.000383626	38	20608942	0.000184386	70	20367957	0.000343677	68
K01778 diaminopimelate epimerase [EC:5.1.1.7]	0.0371737	0.00165356	0.0406989	0.000768663	0.000470113	0.0108549	-0.00352524	-0.00506322	-0.00198727	14011	38517452	0.0363757	10245	28642163	0.0357689	9474	26103837	0.0362935	9652	27161364	0.0355358	8497	22945505	0.0370312	8297	22183832	0.0374011	9993	26358245	0.0379122	11800	28730741	0.041071	10603	26223346	0.0404334	11081	26962296	0.0410981	8798	21374961	0.0411603	8472	20608942	0.0411084	8251	20367957	0.0405097	7517
K00919 4-diphosphocytidyl-2-C-methyl-D-erythritol kinase [EC:2.7.1.148]	0.0323244	0.00203437	0.037069	0.0019045	0.000500016	0.0108571	-0.0047446	-0.00700458	-0.00248462	11426	38517452	0.0296645	8956	28642163	0.0312686	7702	26103837	0.0295052	8536	27161364	0.031427	7647	22945505	0.0333268	7625	22183832	0.0343719	8880	26358245	0.0336896	10154	28730741	0.0353419	9411	26223346	0.0358879	9989	26962296	0.037048	8623	21374961	0.0403416	7955	20608942	0.0385997	7337	20367957	0.0360223	6973
K01495 GTP cyclohydrolase IA [EC:3.5.4.16]	0.0280814	0.00185381	0.0321246	0.00137742	0.000476984	0.0108581	-0.00404318	-0.00593014	-0.00215622	10075	38517452	0.026157	7290	28642163	0.025452	7016	26103837	0.0268773	7399	27161364	0.0272409	6954	22945505	0.0303066	6321	22183832	0.0284937	7677	26358245	0.0291256	8906	28730741	0.0309982	8178	26223346	0.031186	8629	26962296	0.032004	7253	21374961	0.0339322	7027	20608942	0.0340968	6072	20367957	0.0298115	5965
K01430 urease subunit gamma [EC:3.5.1.5]	0.000547945	0.000186611	0.000145238	6.38199e-05	0.000501124	0.0108602	0.000402707	0.000232924	0.00057249	176	38517452	0.000456936	103	28642163	0.00035961	165	26103837	0.000632091	187	27161364	0.000688478	193	22945505	0.000841123	160	22183832	0.000721246	106	26358245	0.000402151	81	28730741	0.000281928	15	26223346	5.72009e-05	25	26962296	9.27221e-05	44	21374961	0.000205848	35	20608942	0.000169829	25	20367957	0.000122742	22
K00574 cyclopropane-fatty-acyl-phospholipid synthase [EC:2.1.1.79]	0.044056	0.00484641	0.0325999	0.00465852	0.000492664	0.0108646	0.0114561	0.0060058	0.0169063	14679	38517452	0.03811	11336	28642163	0.039578	12875	26103837	0.0493223	13297	27161364	0.0489556	11805	22945505	0.051448	9180	22183832	0.0413815	10465	26358245	0.0397029	12627	28730741	0.0439494	6907	26223346	0.0263391	7676	26962296	0.0284694	6159	21374961	0.0288141	6061	20608942	0.0294096	7324	20367957	0.0359584	6152
K09732 uncharacterized protein	0.000245957	9.12436e-05	0.000499359	0.000114189	0.000476624	0.0108718	-0.000253402	-0.000372436	-0.000134369	104	38517452	0.000270007	50	28642163	0.000174568	32	26103837	0.000122587	35	27161364	0.00012886	74	22945505	0.000322503	51	22183832	0.000229897	96	26358245	0.000364212	102	28730741	0.00035502	178	26223346	0.000678784	180	26962296	0.000667599	111	21374961	0.000519299	69	20608942	0.000334806	79	20367957	0.000387864	80
K05802 potassium-dependent mechanosensitive channel	0.0195975	0.00666296	0.00522155	0.00234639	0.000494044	0.0108738	0.0143759	0.00830527	0.0204466	4765	38517452	0.012371	3166	28642163	0.0110536	7822	26103837	0.0299649	7441	27161364	0.0273955	5397	22945505	0.0235209	4741	22183832	0.0213714	4699	26358245	0.0178274	3814	28730741	0.013275	793	26223346	0.00302402	896	26962296	0.00332316	853	21374961	0.00399065	810	20608942	0.00393033	992	20367957	0.0048704	770
K04754 phospholipid-binding lipoprotein MlaA	0.00860603	0.00170532	0.00500358	0.000807509	0.000499949	0.0108765	0.00360245	0.00201319	0.00519171	2888	38517452	0.0074979	2149	28642163	0.00750292	2927	26103837	0.0112129	3181	27161364	0.0117115	1983	22945505	0.00864222	1729	22183832	0.00779396	1924	26358245	0.00729942	2065	28730741	0.00718742	1116	26223346	0.00425575	1092	26962296	0.0040501	941	21374961	0.00440235	931	20608942	0.00451746	1319	20367957	0.00647586	1075
K00451 homogentisate 1,2-dioxygenase [EC:1.13.11.5]	0.00207673	0.000644631	0.00071309	0.000304603	0.000495214	0.0108783	0.00136364	0.000763022	0.00196426	986	38517452	0.00255988	641	28642163	0.00223796	646	26103837	0.00247473	520	27161364	0.00191448	701	22945505	0.00305506	467	22183832	0.00210514	369	26358245	0.00139994	249	28730741	0.000866668	126	26223346	0.000480488	74	26962296	0.000274457	94	21374961	0.000439767	125	20608942	0.000606533	258	20367957	0.0012667	139
K18356 phenylglyoxylate dehydrogenase beta subunit [EC:1.2.1.58]	0.0050952	0.000850987	0.00727331	0.000950377	0.00049723	0.0108803	-0.00217811	-0.00321343	-0.00114279	1909	38517452	0.00495619	1232	28642163	0.00430135	1083	26103837	0.00414882	1216	27161364	0.00447695	1140	22945505	0.00496829	1196	22183832	0.00539131	1841	26358245	0.00698453	1590	28730741	0.00553414	2031	26223346	0.00774501	2110	26962296	0.00782574	1691	21374961	0.00791113	1835	20608942	0.0089039	1468	20367957	0.0072074	1060
K03620 Ni/Fe-hydrogenase 1 B-type cytochrome subunit	0.00336034	0.000984618	0.00116954	0.000808949	0.000498401	0.0108848	0.00219079	0.00115411	0.00322748	1247	38517452	0.00323749	838	28642163	0.00292576	1216	26103837	0.00465832	1026	27161364	0.00377742	1018	22945505	0.0044366	743	22183832	0.00334929	325	26358245	0.00123301	938	28730741	0.0032648	159	26223346	0.00060633	189	26962296	0.000700979	151	21374961	0.000706434	146	20608942	0.00070843	169	20367957	0.000829735	121
K07148 uncharacterized protein	0.00319739	0.00106008	0.000874586	0.000291861	0.000504203	0.0108852	0.00232281	0.00136562	0.00328	1451	38517452	0.00376712	1019	28642163	0.00355769	1198	26103837	0.00458936	1209	27161364	0.00445118	736	22945505	0.0032076	595	22183832	0.00268213	478	26358245	0.00181347	434	28730741	0.00151058	113	26223346	0.000430914	173	26962296	0.000641637	155	21374961	0.000725148	122	20608942	0.000591976	256	20367957	0.00125688	190
K08194 MFS transporter, ACS family, D-galactonate transporter	0.00691874	0.00127773	0.0041997	0.00077942	0.000474335	0.0108856	0.00271904	0.00148146	0.00395661	2368	38517452	0.00614786	2370	28642163	0.00827451	2396	26103837	0.00917873	1837	27161364	0.00676328	1787	22945505	0.00778802	1161	22183832	0.00523354	1648	26358245	0.00625231	1641	28730741	0.00571165	905	26223346	0.00345112	818	26962296	0.00303387	791	21374961	0.00370059	820	20608942	0.00397886	878	20367957	0.00431069	1003
K17230 cytochrome subunit of sulfide dehydrogenase	0.000795368	0.000309421	0.000110958	8.42865e-05	0.000476283	0.0108861	0.00068441	0.000405097	0.000963724	212	38517452	0.0005504	197	28642163	0.000687797	360	26103837	0.00137911	319	27161364	0.00117446	209	22945505	0.000910854	145	22183832	0.000653629	147	26358245	0.0005577	129	28730741	0.000448996	29	26223346	0.000110588	4	26962296	1.48355e-05	3	21374961	1.40351e-05	0	20608942	0	32	20367957	0.00015711	30
K22025 D-erythronate 2-dehydrogenase [EC:1.1.1.410]	0.00174883	0.000584918	0.000486807	0.000197242	0.000505474	0.0108918	0.00126202	0.000730192	0.00179385	760	38517452	0.00197313	495	28642163	0.00172822	609	26103837	0.00233299	677	27161364	0.00249251	380	22945505	0.0016561	470	22183832	0.00211866	203	26358245	0.000770157	264	28730741	0.000918876	81	26223346	0.000308885	120	26962296	0.000445066	137	21374961	0.000640937	90	20608942	0.000436704	112	20367957	0.000549883	18
K01812 glucuronate isomerase [EC:5.3.1.12]	0.0175577	0.00143252	0.0246861	0.00335572	0.000499873	0.0108959	-0.00712841	-0.0102247	-0.00403213	7183	38517452	0.0186487	5395	28642163	0.0188359	4372	26103837	0.0167485	4325	27161364	0.0159234	3536	22945505	0.0154104	3728	22183832	0.016805	5172	26358245	0.0196219	5306	28730741	0.018468	7571	26223346	0.0288712	7672	26962296	0.0284546	5643	21374961	0.0264	5617	20608942	0.0272552	4570	20367957	0.0224372	4321
K18855 UDP-N-acetylglucosamine 3-dehydrogenase [EC:1.1.1.374]	0.0443388	0.00679621	0.0604523	0.00651156	0.000473931	0.0108985	-0.0161135	-0.0237448	-0.00848217	15121	38517452	0.0392575	11212	28642163	0.0391451	10416	26103837	0.0399022	10802	27161364	0.0397697	9194	22945505	0.0400689	12282	22183832	0.0553646	14756	26358245	0.0559825	12992	28730741	0.0452199	15820	26223346	0.0603279	16882	26962296	0.0626134	13532	21374961	0.0633077	13935	20608942	0.0676163	13235	20367957	0.0649795	11792
K01256 aminopeptidase N [EC:3.4.11.2]	0.0311753	0.00469212	0.0211195	0.00309724	0.000473011	0.0108995	0.0100558	0.00543122	0.0146804	12228	38517452	0.0317466	9549	28642163	0.033339	9781	26103837	0.0374696	10119	27161364	0.0372551	7205	22945505	0.0314005	6040	22183832	0.027227	7416	26358245	0.0281354	6559	28730741	0.0228292	6527	26223346	0.02489	6598	26962296	0.0244712	3566	21374961	0.0166831	3937	20608942	0.0191034	3700	20367957	0.0181658	3340
K04077 chaperonin GroEL	0.146587	0.00632163	0.162863	0.00712736	0.000497223	0.0109012	-0.016276	-0.0240094	-0.00854263	55453	38517452	0.143969	41982	28642163	0.146574	37235	26103837	0.142642	38152	27161364	0.140464	33414	22945505	0.145623	31779	22183832	0.143253	38984	26358245	0.147901	46622	28730741	0.162272	42940	26223346	0.163747	44899	26962296	0.166525	36798	21374961	0.172155	35430	20608942	0.171916	30647	20367957	0.150467	27968
K18707 threonylcarbamoyladenosine tRNA methylthiotransferase MtaB [EC:2.8.4.5]	0.0498097	0.00483444	0.0605178	0.00129193	0.000476152	0.0109051	-0.0107081	-0.0150701	-0.00634608	19000	38517452	0.0493283	14715	28642163	0.0513753	11216	26103837	0.0429669	12290	27161364	0.0452481	10762	22945505	0.0469024	11036	22183832	0.0497479	14049	26358245	0.0533002	17126	28730741	0.0596086	15890	26223346	0.0605949	16747	26962296	0.0621127	13394	21374961	0.0626621	12516	20608942	0.0607309	11913	20367957	0.0584889	10770
K01657 anthranilate synthase component I [EC:4.1.3.27]	0.0421765	0.00460633	0.0525104	0.0039308	0.0005147	0.010965	-0.0103339	-0.0152542	-0.00541352	15446	38517452	0.0401013	11669	28642163	0.0407406	10124	26103837	0.0387836	10494	27161364	0.0386358	9317	22945505	0.0406049	8869	22183832	0.0399796	11952	26358245	0.0453444	15291	28730741	0.0532217	13931	26223346	0.0531244	14991	26962296	0.0555999	11677	21374961	0.0546293	11595	20608942	0.056262	9117	20367957	0.0447615	8518
K00556 tRNA (guanosine-2'-O-)-methyltransferase [EC:2.1.1.34]	0.00359916	0.000568771	0.00237303	0.000416875	0.000513792	0.0109664	0.00122613	0.000649568	0.00180269	1663	38517452	0.00431752	1159	28642163	0.00404648	1131	26103837	0.0043327	924	27161364	0.00340189	850	22945505	0.00370443	635	22183832	0.00286245	884	26358245	0.00335379	797	28730741	0.00277403	637	26223346	0.00242913	597	26962296	0.0022142	383	21374961	0.00179182	356	20608942	0.00172741	578	20367957	0.00283779	425
K19416 modulator of FtsH protease	0.00135609	0.000536898	0.000202393	0.000186213	0.000512159	0.010973	0.00115369	0.000664887	0.0016425	460	38517452	0.00119426	311	28642163	0.00108581	616	26103837	0.00235981	509	27161364	0.00187399	388	22945505	0.00169096	261	22183832	0.00117653	173	26358245	0.000656341	233	28730741	0.000810978	7	26223346	2.66938e-05	40	26962296	0.000148355	8	21374961	3.7427e-05	0	20608942	0	48	20367957	0.000235664	32
K02018 molybdate transport system permease protein	0.0199964	0.00198775	0.0156211	0.0015918	0.00051326	0.0109758	0.00437528	0.00230161	0.00644895	8659	38517452	0.0224807	6322	28642163	0.0220724	5016	26103837	0.0192156	5305	27161364	0.0195314	4824	22945505	0.0210237	4736	22183832	0.0213489	4725	26358245	0.0179261	4704	28730741	0.0163727	4049	26223346	0.0154404	4041	26962296	0.0149876	2878	21374961	0.0134644	3124	20608942	0.0151585	3730	20367957	0.0183131	3268
K00598 trans-aconitate 2-methyltransferase [EC:2.1.1.144]	0.00851029	0.00108636	0.00618665	0.00076889	0.000520258	0.0109799	0.00232365	0.00123343	0.00341386	3094	38517452	0.00803272	2096	28642163	0.00731788	2187	26103837	0.00837808	2236	27161364	0.00823228	2040	22945505	0.00889063	1914	22183832	0.00862791	2919	26358245	0.0110743	2163	28730741	0.00752852	1599	26223346	0.00609762	1759	26962296	0.00652393	1216	21374961	0.0056889	1234	20608942	0.00598769	1370	20367957	0.00672625	1400
K21400 2-amino-4-ketopentanoate thiolase beta subunit [EC:2.3.1.263]	0.00185277	0.000471305	0.000852417	0.000311174	0.000511742	0.0109849	0.00100036	0.000535811	0.0014649	828	38517452	0.00214967	551	28642163	0.00192374	489	26103837	0.00187329	508	27161364	0.0018703	527	22945505	0.00229675	550	22183832	0.00247928	305	26358245	0.00115713	308	28730741	0.00107202	122	26223346	0.000465234	151	26962296	0.000560041	169	21374961	0.000790645	191	20608942	0.000926782	229	20367957	0.00112432	263
K03580 ATP-dependent helicase HepA [EC:3.6.4.-]	0.0348275	0.00242749	0.0280903	0.00308916	0.000531708	0.0109954	0.00673721	0.00353551	0.00993891	13953	38517452	0.0362251	10568	28642163	0.0368967	8067	26103837	0.0309035	10031	27161364	0.0369311	7813	22945505	0.0340502	7936	22183832	0.0357738	9730	26358245	0.0369144	8885	28730741	0.0309251	5945	26223346	0.0226706	6955	26962296	0.0257953	5258	21374961	0.0245989	6217	20608942	0.0301665	6228	20367957	0.0305774	5164
K00371 nitrate reductase / nitrite oxidoreductase, beta subunit [EC:1.7.5.1 1.7.99.-]	0.00333828	0.00121054	0.000768541	0.000466147	0.000527879	0.0109968	0.00256974	0.00146121	0.00367828	1826	38517452	0.00474071	1093	28642163	0.00381605	1247	26103837	0.00477708	1074	27161364	0.00395415	856	22945505	0.00373058	569	22183832	0.00256493	391	26358245	0.00148341	471	28730741	0.00163936	111	26223346	0.000423287	98	26962296	0.000363471	103	21374961	0.000481872	79	20608942	0.000383329	143	20367957	0.000702083	131
K02458 general secretion pathway protein I	0.00594719	0.0010071	0.00383545	0.000571493	0.000520144	0.010998	0.00211174	0.00114935	0.00307414	2609	38517452	0.00677355	1752	28642163	0.00611686	1603	26103837	0.00614086	1601	27161364	0.0058944	1617	22945505	0.00704713	1527	22183832	0.00688339	1241	26358245	0.0047082	1153	28730741	0.00401312	1064	26223346	0.00405745	962	26962296	0.00356795	813	21374961	0.00380352	756	20608942	0.00366831	944	20367957	0.00463473	851
K19804 lipopolysaccharide assembly protein B	0.00652286	0.00161099	0.00315331	0.000938027	0.000533804	0.0109985	0.00336955	0.00182306	0.00491605	2095	38517452	0.00543909	1436	28642163	0.00501359	2511	26103837	0.00961928	2136	27161364	0.00786411	1794	22945505	0.00781852	1392	22183832	0.00627484	1335	26358245	0.00506483	1462	28730741	0.00508863	687	26223346	0.0026198	681	26962296	0.00252575	479	21374961	0.00224094	566	20608942	0.00274638	710	20367957	0.00348587	982
K02553 regulator of ribonuclease activity A	0.000829881	0.000310865	0.000158173	9.14931e-05	0.000535855	0.0110006	0.000671708	0.000390487	0.000952929	254	38517452	0.000659441	218	28642163	0.000761116	357	26103837	0.00136762	251	27161364	0.000924107	276	22945505	0.00120285	143	22183832	0.000644614	201	26358245	0.00076257	91	28730741	0.000316734	9	26223346	3.43206e-05	19	26962296	7.04688e-05	55	21374961	0.00025731	14	20608942	6.79317e-05	32	20367957	0.00015711	46
K05559 multicomponent K+	0.00502357	0.0015889	0.00161583	0.000549865	0.000519473	0.0110044	0.00340774	0.00196132	0.00485416	1451	38517452	0.00376712	889	28642163	0.00310382	1893	26103837	0.00725181	1719	27161364	0.00632884	1534	22945505	0.00668541	1269	22183832	0.00572038	1181	26358245	0.00448057	819	28730741	0.00285061	563	26223346	0.00214694	446	26962296	0.00165416	213	21374961	0.000996493	257	20608942	0.00124703	322	20367957	0.00158091	136
K02656 type IV pilus assembly protein PilF	0.00376891	0.00126469	0.000964581	0.000245949	0.000531179	0.0110047	0.00280432	0.00166903	0.00393962	1300	38517452	0.00337509	1186	28642163	0.00414075	1465	26103837	0.0056122	1274	27161364	0.00469049	1018	22945505	0.0044366	935	22183832	0.00421478	563	26358245	0.00213595	444	28730741	0.00154538	96	26223346	0.000366086	248	26962296	0.000919803	236	21374961	0.0011041	238	20608942	0.00115484	241	20367957	0.00118323	169
K17759 NAD(P)H-hydrate epimerase [EC:5.1.99.6]	0.0345725	0.00144858	0.0375974	0.000748409	0.000535093	0.011005	-0.00302487	-0.00438938	-0.00166036	12818	38517452	0.0332784	9877	28642163	0.0344841	8598	26103837	0.0329377	9322	27161364	0.0343208	7800	22945505	0.0339936	7594	22183832	0.0342321	9334	26358245	0.0354121	10895	28730741	0.0379211	9556	26223346	0.0364408	9968	26962296	0.0369701	8205	21374961	0.038386	8022	20608942	0.0389249	7648	20367957	0.0375492	6844
K01730 oligogalacturonide lyase [EC:4.2.2.6]	0.00546401	0.000380634	0.00653696	0.00049152	0.000511718	0.0110054	-0.00107294	-0.00157988	-0.000566008	2057	38517452	0.00534044	1472	28642163	0.00513928	1390	26103837	0.00532489	1560	27161364	0.00574345	1260	22945505	0.00549127	1065	22183832	0.00480079	1521	26358245	0.00577049	1753	28730741	0.00610148	1809	26223346	0.00689843	1724	26962296	0.00639411	1266	21374961	0.00592282	1216	20608942	0.00590035	1467	20367957	0.00720249	1279
K01235 alpha-glucuronidase [EC:3.2.1.139]	0.00530892	0.00248498	0.0131966	0.00372548	0.00052733	0.0110057	-0.00788772	-0.0115689	-0.00420653	1689	38517452	0.00438503	1257	28642163	0.00438864	881	26103837	0.00337498	958	27161364	0.00352707	881	22945505	0.00383953	969	22183832	0.00436805	1994	26358245	0.007565	3167	28730741	0.011023	4530	26223346	0.0172747	4676	26962296	0.0173427	3471	21374961	0.0162386	3004	20608942	0.0145762	1579	20367957	0.00775237	1304
K07776 two-component system, OmpR family, response regulator RegX3	0.0120095	0.00120207	0.00906191	0.00125779	0.000518852	0.011012	0.00294758	0.00153691	0.00435824	4277	38517452	0.0111041	3218	28642163	0.0112352	2984	26103837	0.0114313	3730	27161364	0.0137327	3101	22945505	0.0135146	2538	22183832	0.0114408	3493	26358245	0.013252	2978	28730741	0.0103652	2079	26223346	0.00792805	2476	26962296	0.00918319	1600	21374961	0.00748539	1516	20608942	0.00735603	2152	20367957	0.0105656	1666
K16886 quinone-modifying oxidoreductase, subunit QmoB	0.00521879	0.00104489	0.00284835	0.000927248	0.000526895	0.011017	0.00237044	0.00123646	0.00350443	1587	38517452	0.00412021	1382	28642163	0.00482505	1250	26103837	0.00478857	1399	27161364	0.0051507	1602	22945505	0.00698176	1531	22183832	0.00690142	1264	26358245	0.00479546	1203	28730741	0.00418715	575	26223346	0.0021927	401	26962296	0.00148726	509	21374961	0.00238129	535	20608942	0.00259596	843	20367957	0.00413885	783
K01756 adenylosuccinate lyase [EC:4.3.2.2]	0.0656777	0.00260325	0.0711145	0.0014166	0.00053377	0.0110179	-0.00543679	-0.00790755	-0.00296602	25360	38517452	0.0658403	19177	28642163	0.0669537	16552	26103837	0.0634083	16879	27161364	0.0621434	14982	22945505	0.0652938	14223	22183832	0.0641143	17487	26358245	0.0663436	20492	28730741	0.0713243	18404	26223346	0.0701817	18988	26962296	0.0704243	15501	21374961	0.0725194	15221	20608942	0.0738563	14096	20367957	0.0692067	12971
K03928 carboxylesterase [EC:3.1.1.1]	0.0159202	0.00372322	0.00776868	0.000919406	0.00053101	0.0110214	0.00815154	0.00479784	0.0115052	6925	38517452	0.0179789	4828	28642163	0.0168563	5422	26103837	0.0207709	5534	27161364	0.0203745	3635	22945505	0.0158419	3160	22183832	0.0142446	3179	26358245	0.0120607	2653	28730741	0.00923401	2122	26223346	0.00809203	2037	26962296	0.00755499	1354	21374961	0.00633451	1311	20608942	0.00636132	1710	20367957	0.00839554	1616
K13633 AraC family transcriptional regulator, transcriptional activator FtrA	0.00236694	0.00085192	0.000576469	0.000508388	0.000518489	0.011025	0.00179047	0.000968894	0.00261206	503	38517452	0.0013059	345	28642163	0.00120452	891	26103837	0.00341329	895	27161364	0.00329512	468	22945505	0.00203962	424	22183832	0.0019113	895	26358245	0.00339552	681	28730741	0.00237028	44	26223346	0.000167789	107	26962296	0.00039685	88	21374961	0.000411697	41	20608942	0.000198943	58	20367957	0.000284761	47
K07735 putative transcriptional regulator	0.00453133	0.000750516	0.00251631	0.000911733	0.000530215	0.0110252	0.00201502	0.00105439	0.00297565	1558	38517452	0.00404492	981	28642163	0.00342502	1467	26103837	0.00561986	1550	27161364	0.00570664	1093	22945505	0.00476346	898	22183832	0.00404799	1079	26358245	0.0040936	1307	28730741	0.00454913	584	26223346	0.00222702	651	26962296	0.00241448	446	21374961	0.00208655	293	20608942	0.00142171	467	20367957	0.00229282	305
K15357 N-formylmaleamate deformylase [EC:3.5.1.106]	0.00254701	0.000447786	0.00159469	0.000308556	0.000526813	0.0110357	0.000952327	0.000506191	0.00139846	1118	38517452	0.00290258	713	28642163	0.00248934	778	26103837	0.0029804	875	27161364	0.00322149	505	22945505	0.00220087	586	22183832	0.00264156	555	26358245	0.0021056	527	28730741	0.00183427	384	26223346	0.00146434	534	26962296	0.00198054	337	21374961	0.00157661	216	20608942	0.00104809	410	20367957	0.00201297	325
K01781 mandelate racemase [EC:5.1.2.2]	0.00255633	0.000758776	0.000881853	0.000169138	0.000524368	0.011046	0.00167448	0.000992185	0.00235677	1133	38517452	0.00294152	956	28642163	0.00333774	781	26103837	0.0029919	903	27161364	0.00332458	561	22945505	0.00244492	600	22183832	0.00270467	425	26358245	0.0016124	314	28730741	0.00109291	166	26223346	0.000633024	195	26962296	0.000723232	206	21374961	0.000963744	194	20608942	0.000941339	135	20367957	0.000662806	196
K01167 ribonuclease T1 [EC:3.1.27.3]	0.000700927	0.00029315	4.19666e-05	4.0208e-05	0.000526409	0.0110477	0.00065896	0.000396437	0.000921483	427	38517452	0.00110859	228	28642163	0.000796029	260	26103837	0.000996022	237	27161364	0.000872563	135	22945505	0.000588351	159	22183832	0.000716738	78	26358245	0.000295923	67	28730741	0.0002332	2	26223346	7.62679e-06	6	26962296	2.22533e-05	23	21374961	0.000107603	4	20608942	1.94091e-05	0	20367957	0	3
K07755 arsenite methyltransferase [EC:2.1.1.137]	0.0669564	0.0034308	0.0743808	0.00259549	0.000525738	0.0110542	-0.00742447	-0.0109362	-0.0039127	25598	38517452	0.0664582	18295	28642163	0.0638744	16561	26103837	0.0634428	16858	27161364	0.0620661	15845	22945505	0.0690549	15026	22183832	0.067734	18608	26358245	0.0705965	20808	28730741	0.0724242	19077	26223346	0.0727482	19873	26962296	0.0737066	16799	21374961	0.078592	15867	20608942	0.0769909	14455	20367957	0.0709693	13030
K00479 glycine betaine catabolism A	0.0030601	0.00107626	0.000777008	0.00039564	0.000543008	0.011067	0.00228309	0.00130026	0.00326592	1822	38517452	0.00473032	871	28642163	0.00304097	936	26103837	0.00358568	657	27161364	0.00241888	961	22945505	0.00418818	722	22183832	0.00325462	547	26358245	0.00207525	341	28730741	0.00118688	97	26223346	0.000369899	91	26962296	0.000337508	93	21374961	0.000435089	95	20608942	0.000460965	205	20367957	0.00100648	199
K07574 RNA-binding protein	0.00121524	0.000461798	0.000204057	0.00010781	0.000542088	0.0110682	0.00101118	0.000595629	0.00142673	464	38517452	0.00120465	197	28642163	0.000687797	433	26103837	0.00165876	516	27161364	0.00189976	396	22945505	0.00172583	223	22183832	0.00100524	249	26358245	0.000944676	171	28730741	0.000595181	8	26223346	3.05072e-05	36	26962296	0.00013352	39	21374961	0.000182456	53	20608942	0.00025717	60	20367957	0.00029458	18
K07140 uncharacterized protein	0.00314605	0.00101134	0.00103211	0.000479726	0.000540312	0.011072	0.00211393	0.00117124	0.00305662	1027	38517452	0.00266632	670	28642163	0.00233921	1267	26103837	0.00485369	1162	27161364	0.00427814	884	22945505	0.00385261	700	22183832	0.00315545	498	26358245	0.00188935	613	28730741	0.0021336	270	26223346	0.00102962	217	26962296	0.000804828	186	21374961	0.000870177	116	20608942	0.000562862	186	20367957	0.000913199	89
K00927 phosphoglycerate kinase [EC:2.7.2.3]	0.0636948	0.00312478	0.0713238	0.00327374	0.000541727	0.0110809	-0.00762899	-0.0112985	-0.0039595	24106	38517452	0.0625846	18529	28642163	0.0646913	15687	26103837	0.0600946	16582	27161364	0.06105	14590	22945505	0.0635854	14108	22183832	0.0635959	16562	26358245	0.0628342	20434	28730741	0.0711224	17968	26223346	0.0685191	17980	26962296	0.0666857	16133	21374961	0.0754762	14572	20608942	0.0707072	15441	20367957	0.0758103	13468
K01684 galactonate dehydratase [EC:4.2.1.6]	0.0236751	0.00145706	0.0188422	0.00230922	0.000552491	0.0111996	0.00483288	0.0025803	0.00708547	9493	38517452	0.024646	6861	28642163	0.0239542	6084	26103837	0.0233069	6653	27161364	0.0244944	5124	22945505	0.0223312	4808	22183832	0.0216734	6984	26358245	0.0264965	6464	28730741	0.0224985	4682	26223346	0.0178543	5079	26962296	0.0188374	3271	21374961	0.015303	3667	20608942	0.0177932	3705	20367957	0.0181903	3213
K13816 DSF synthase	0.000582464	0.000237963	7.17968e-05	7.24094e-05	0.000551934	0.0112084	0.000510667	0.000295165	0.00072617	313	38517452	0.000812619	263	28642163	0.000918227	164	26103837	0.00062826	138	27161364	0.000508075	172	22945505	0.000749602	129	22183832	0.000581505	73	26358245	0.000276953	53	28730741	0.000184471	6	26223346	2.28804e-05	0	26962296	0	0	21374961	0	0	20608942	0	35	20367957	0.000171839	21
K00782 L-lactate dehydrogenase complex protein LldG	0.0132074	0.00163527	0.0181797	0.00234744	0.000551893	0.0112278	-0.00497223	-0.00731781	-0.00262665	5158	38517452	0.0133913	3830	28642163	0.0133719	2896	26103837	0.0110942	2925	27161364	0.010769	3150	22945505	0.0137282	2797	22183832	0.0126083	3848	26358245	0.0145988	4625	28730741	0.0160977	4685	26223346	0.0178658	5393	26962296	0.020002	4606	21374961	0.0215486	4290	20608942	0.0208162	3331	20367957	0.0163541	3361
K10190 lactose/L-arabinose transport system permease protein	0.000660491	0.000283268	0.00217934	0.000721681	0.000555406	0.0112385	-0.00151885	-0.00218055	-0.000857156	147	38517452	0.000381645	119	28642163	0.000415471	111	26103837	0.000425225	162	27161364	0.000596435	113	22945505	0.000492471	203	22183832	0.000915081	324	26358245	0.00122922	238	28730741	0.000828381	679	26223346	0.0025893	721	26962296	0.0026741	686	21374961	0.00320936	442	20608942	0.0021447	510	20367957	0.00250393	402
K00294 1-pyrroline-5-carboxylate dehydrogenase [EC:1.2.1.88]	0.0245015	0.00359372	0.0168843	0.00254408	0.000560666	0.0112642	0.00761722	0.00401051	0.0112239	11496	38517452	0.0298462	8717	28642163	0.0304342	6595	26103837	0.0252645	6617	27161364	0.0243618	5118	22945505	0.022305	4612	22183832	0.0207899	5957	26358245	0.0226001	5864	28730741	0.0204102	4401	26223346	0.0167828	4371	26962296	0.0162115	2933	21374961	0.0137217	2916	20608942	0.0141492	3279	20367957	0.0160988	2931
K05946 N-acetylglucosaminyldiphosphoundecaprenol N-acetyl-beta-D-mannosaminyltransferase [EC:2.4.1.187]	0.0169305	0.0020111	0.0223968	0.00250841	0.000559814	0.0112671	-0.00546633	-0.00808424	-0.00284842	6435	38517452	0.0167067	4458	28642163	0.0155645	4933	26103837	0.0188976	5227	27161364	0.0192442	3036	22945505	0.0132313	3387	22183832	0.0152679	5019	26358245	0.0190415	5025	28730741	0.01749	6298	26223346	0.0240168	6505	26962296	0.0241263	5839	21374961	0.027317	4422	20608942	0.0214567	3996	20367957	0.0196191	3480
K15916 glucose/mannose-6-phosphate isomerase [EC:5.3.1.9 5.3.1.8]	0.02258	0.00250834	0.0284953	0.00247479	0.000558692	0.0112848	-0.00591529	-0.00877182	-0.00305875	9187	38517452	0.0238515	7297	28642163	0.0254764	4818	26103837	0.0184571	5350	27161364	0.0196971	4893	22945505	0.0213244	4968	22183832	0.0223947	6900	26358245	0.0261778	6683	28730741	0.0232608	7877	26223346	0.0300381	7633	26962296	0.0283099	6500	21374961	0.0304094	5736	20608942	0.0278326	5982	20367957	0.0293697	5832
K00958 sulfate adenylyltransferase [EC:2.7.7.4]	0.020049	0.00309093	0.0136313	0.00156604	0.000559803	0.011287	0.0064177	0.00351372	0.00932168	8502	38517452	0.0220731	6168	28642163	0.0215347	6193	26103837	0.0237245	6384	27161364	0.023504	4263	22945505	0.0185788	3663	22183832	0.016512	5243	26358245	0.0198913	4187	28730741	0.0145732	3164	26223346	0.0120656	3504	26962296	0.0129959	2597	21374961	0.0121497	2454	20608942	0.0119075	3010	20367957	0.0147781	2413
K04094 methylenetetrahydrofolate--tRNA-(uracil-5-)-methyltransferase [EC:2.1.1.74]	0.0192781	0.00127481	0.0154735	0.00179483	0.000563005	0.0112911	0.00380452	0.00200154	0.00560751	8418	38517452	0.021855	5977	28642163	0.0208678	4739	26103837	0.0181544	5184	27161364	0.0190859	4277	22945505	0.0186398	4201	22183832	0.0189372	4740	26358245	0.017983	5373	28730741	0.0187012	3554	26223346	0.0135528	3932	26962296	0.0145833	3080	21374961	0.0144094	2810	20608942	0.0136349	3268	20367957	0.0160448	2697
K11927 ATP-dependent RNA helicase RhlE [EC:3.6.4.13]	0.0502991	0.00451083	0.0408606	0.00294593	0.00056858	0.0113827	0.00943846	0.00500384	0.0138731	21172	38517452	0.0549673	15809	28642163	0.0551949	13420	26103837	0.0514101	14658	27161364	0.0539664	11505	22945505	0.0501405	10509	22183832	0.0473723	10747	26358245	0.0407728	13954	28730741	0.0485682	9743	26223346	0.0371539	10283	26962296	0.0381384	7899	21374961	0.0369545	8727	20608942	0.0423457	8312	20367957	0.0408092	7601
K22211 D-lactate dehydratase [EC:4.2.1.130]	0.00149646	0.000554362	0.000349422	0.000302099	0.000573169	0.0113938	0.00114704	0.000620775	0.00167331	556	38517452	0.0014435	334	28642163	0.00116611	533	26103837	0.00204185	554	27161364	0.00203966	544	22945505	0.00237083	285	22183832	0.00128472	232	26358245	0.00088018	214	28730741	0.000744847	12	26223346	4.57608e-05	8	26962296	2.96711e-05	8	21374961	3.7427e-05	34	20608942	0.000164977	177	20367957	0.000869012	102
K03726 helicase [EC:3.6.4.-]	0.00732566	0.00297224	0.0202117	0.00621618	0.000573041	0.0114113	-0.0128861	-0.0186855	-0.00708669	2192	38517452	0.00569093	1855	28642163	0.00647647	739	26103837	0.002831	951	27161364	0.0035013	1955	22945505	0.00852019	2344	22183832	0.0105663	2677	26358245	0.0101562	3121	28730741	0.0108629	5975	26223346	0.022785	6529	26962296	0.0242153	6540	21374961	0.0305965	4234	20608942	0.0205445	4085	20367957	0.020056	3932
K06954 uncharacterized protein	0.00810314	0.00270642	0.0025007	0.00155744	0.000576585	0.0114214	0.00560244	0.00300984	0.00819503	2867	38517452	0.00744338	1984	28642163	0.00692685	3116	26103837	0.0119369	3080	27161364	0.0113396	2277	22945505	0.00992351	1894	22183832	0.00853775	1194	26358245	0.00452989	1203	28730741	0.00418715	329	26223346	0.00125461	241	26962296	0.000893841	188	21374961	0.000879534	221	20608942	0.00107235	1033	20367957	0.00507169	730
K13049 carboxypeptidase PM20D1 [EC:3.4.17.-]	0.0199276	0.00282111	0.0139807	0.00101687	0.000572613	0.0114229	0.00594696	0.00337353	0.00852039	9063	38517452	0.0235296	6198	28642163	0.0216394	5960	26103837	0.0228319	5688	27161364	0.0209415	4112	22945505	0.0179207	3902	22183832	0.0175894	5374	26358245	0.0203883	4189	28730741	0.0145802	3825	26223346	0.0145862	3388	26962296	0.0125657	2821	21374961	0.0131977	2597	20608942	0.0126013	2825	20367957	0.0138698	2733
K09456 putative acyl-CoA dehydrogenase	0.00617774	0.00200221	0.00203615	0.00101265	0.000575904	0.011428	0.00414159	0.00226091	0.00602227	1600	38517452	0.00415396	1022	28642163	0.00356817	2336	26103837	0.00894888	2231	27161364	0.00821387	1931	22945505	0.00841559	1451	22183832	0.0065408	1373	26358245	0.005209	1256	28730741	0.00437162	237	26223346	0.000903775	265	26962296	0.000982854	289	21374961	0.00135205	255	20608942	0.00123733	531	20367957	0.00260704	394
K00982 [glutamine synthetase] adenylyltransferase / [glutamine synthetase]-adenylyl-L-tyrosine phosphorylase [EC:2.7.7.42 2.7.7.89]	0.0269318	0.00519466	0.0160304	0.00353175	0.000578	0.0114294	0.0109015	0.00574393	0.016059	7780	38517452	0.0201986	5598	28642163	0.0195446	8932	26103837	0.0342172	8669	27161364	0.0319167	7491	22945505	0.0326469	5790	22183832	0.0261001	6755	26358245	0.0256277	7241	28730741	0.025203	3964	26223346	0.0151163	3714	26962296	0.0137748	2769	21374961	0.0129544	3033	20608942	0.0147169	2992	20367957	0.0146897	2341
K07182 CBS domain-containing protein	0.0337863	0.00716547	0.0174181	0.00665254	0.000579176	0.0114327	0.0163682	0.00843793	0.0242985	13212	38517452	0.0343013	9632	28642163	0.0336287	11861	26103837	0.0454378	12002	27161364	0.0441878	7242	22945505	0.0315617	6677	22183832	0.0300985	6089	26358245	0.0231009	8037	28730741	0.0279735	2796	26223346	0.0106623	3075	26962296	0.0114048	2390	21374961	0.0111813	2366	20608942	0.0114805	5903	20367957	0.0289818	4263
K02864 large subunit ribosomal protein L10	0.0303741	0.00123556	0.0329359	0.000722674	0.000572289	0.0114367	-0.0025618	-0.00374888	-0.00137473	11565	38517452	0.0300254	8387	28642163	0.029282	7874	26103837	0.0301641	8429	27161364	0.0310331	7387	22945505	0.0321937	6655	22183832	0.0299993	7458	26358245	0.0282948	9194	28730741	0.0320006	8367	26223346	0.0319067	8842	26962296	0.0327939	7066	21374961	0.0330574	6762	20608942	0.032811	6550	20367957	0.0321584	6176
K03814 monofunctional glycosyltransferase [EC:2.4.1.129]	0.0117179	0.00166721	0.00824622	0.00107139	0.00058304	0.0114688	0.00347164	0.00183869	0.00510458	4568	38517452	0.0118596	3425	28642163	0.0119579	3743	26103837	0.0143389	3667	27161364	0.0135008	2759	22945505	0.0120241	2437	22183832	0.0109855	2252	26358245	0.00854382	3026	28730741	0.0105323	1816	26223346	0.00692513	2048	26962296	0.00759579	1462	21374961	0.00683978	1638	20608942	0.00794801	1771	20367957	0.00869503	1544
K03723 transcription-repair coupling factor (superfamily II helicase) [EC:3.6.4.-]	0.147475	0.00616689	0.160242	0.00366059	0.000582075	0.0114698	-0.0127675	-0.0187088	-0.00682633	54495	38517452	0.141481	41124	28642163	0.143579	37389	26103837	0.143232	40109	27161364	0.147669	33503	22945505	0.146011	31922	22183832	0.143898	40193	26358245	0.152487	46383	28730741	0.16144	40886	26223346	0.155915	42308	26962296	0.156915	34882	21374961	0.163191	32910	20608942	0.159688	31665	20367957	0.155465	29169
K11293 protein HIRA/HIR1	0.00307199	0.000705603	0.00144974	0.000666689	0.000584755	0.0114826	0.00162225	0.000835069	0.00240942	1145	38517452	0.00297268	915	28642163	0.00319459	1045	26103837	0.00400324	1180	27161364	0.00434441	651	22945505	0.00283716	481	22183832	0.00216825	650	26358245	0.00246602	744	28730741	0.00258956	433	26223346	0.0016512	408	26962296	0.00151322	291	21374961	0.00136141	174	20608942	0.000844294	145	20367957	0.000711903	186
K02549 O-succinylbenzoate synthase [EC:4.2.1.113]	0.0140337	0.00234684	0.00915512	0.00151463	0.000593036	0.0115249	0.00487855	0.00257768	0.00717942	5854	38517452	0.0151983	4226	28642163	0.0147545	4690	26103837	0.0179667	4502	27161364	0.016575	3068	22945505	0.0133708	2558	22183832	0.0115309	3062	26358245	0.0116169	3234	28730741	0.0112562	2052	26223346	0.00782509	2226	26962296	0.00825597	1679	21374961	0.00785499	1620	20608942	0.00786067	1955	20367957	0.00959841	1566
K02033 peptide/nickel transport system permease protein	0.165023	0.0170179	0.200786	0.0118673	0.000589299	0.0115317	-0.035763	-0.0527722	-0.0187537	64502	38517452	0.167462	47818	28642163	0.16695	35441	26103837	0.135769	38195	27161364	0.140623	38717	22945505	0.168735	39390	22183832	0.177562	50051	26358245	0.189887	49761	28730741	0.173198	56877	26223346	0.216895	57354	26962296	0.212719	45534	21374961	0.213025	42491	20608942	0.206177	38339	20367957	0.188232	34840
K01082 3'(2'), 5'-bisphosphate nucleotidase [EC:3.1.3.7]	0.012141	0.00220028	0.00759823	0.00103634	0.00059265	0.0115373	0.00454273	0.00249338	0.00659207	4550	38517452	0.0118128	3075	28642163	0.0107359	3735	26103837	0.0143082	3314	27161364	0.0122012	3441	22945505	0.0149964	3210	22183832	0.01447	2731	26358245	0.0103611	2368	28730741	0.00824204	1835	26223346	0.00699758	1841	26962296	0.00682805	1413	21374961	0.00661054	1279	20608942	0.00620604	1932	20367957	0.00948549	1477
K02669 twitching motility protein PilT	0.111407	0.0048869	0.122923	0.00487826	0.000590613	0.0115374	-0.0115156	-0.0171132	-0.00591801	40951	38517452	0.106318	31415	28642163	0.109681	29858	26103837	0.114382	31781	27161364	0.117008	23588	22945505	0.1028	24192	22183832	0.109052	30592	26358245	0.116062	33314	28730741	0.115952	32923	26223346	0.125548	33599	26962296	0.124615	27025	21374961	0.126433	27037	20608942	0.131191	24495	20367957	0.120262	22189
K04487 cysteine desulfurase [EC:2.8.1.7]	0.0927401	0.00466097	0.102383	0.00209909	0.000591949	0.0115435	-0.00964298	-0.0139644	-0.0053216	35204	38517452	0.0913975	27450	28642163	0.0958377	22822	26103837	0.0874278	24332	27161364	0.0895831	20648	22945505	0.0899871	20284	22183832	0.091436	24458	26358245	0.0927907	29725	28730741	0.103461	26103	26223346	0.0995411	26700	26962296	0.0990272	22000	21374961	0.102924	21086	20608942	0.102315	21490	20367957	0.105509	18856
K15532 unsaturated rhamnogalacturonyl hydrolase [EC:3.2.1.172]	0.00906599	0.00300342	0.0198703	0.00523461	0.000589294	0.0115516	-0.0108043	-0.0158161	-0.00579245	3643	38517452	0.00945805	2892	28642163	0.010097	2070	26103837	0.00792987	2005	27161364	0.00738181	1392	22945505	0.00606655	1600	22183832	0.00721246	2113	26358245	0.00801647	4702	28730741	0.0163657	6462	26223346	0.0246422	7185	26962296	0.0266483	4932	21374961	0.0230737	5056	20608942	0.024533	2533	20367957	0.0124362	2310
K02611 ring-1,2-phenylacetyl-CoA epoxidase subunit PaaC [EC:1.14.13.149]	0.00106329	0.000388623	0.000207099	4.96144e-05	0.000601396	0.0116673	0.00085619	0.000508269	0.00120411	494	38517452	0.00128254	267	28642163	0.000932192	429	26103837	0.00164344	389	27161364	0.00143218	293	22945505	0.00127694	200	22183832	0.000901557	123	26358245	0.000466647	164	28730741	0.000570817	41	26223346	0.000156349	47	26962296	0.000174317	44	21374961	0.000205848	43	20608942	0.000208647	47	20367957	0.000230755	26
K03579 ATP-dependent helicase HrpB [EC:3.6.4.13]	0.0105534	0.00241434	0.00545695	0.000751982	0.000608997	0.0116942	0.0050964	0.00290817	0.00728464	4080	38517452	0.0105926	2957	28642163	0.0103239	3695	26103837	0.014155	3450	27161364	0.0127019	2745	22945505	0.0119631	2411	22183832	0.0108683	1935	26358245	0.00734116	1862	28730741	0.00648086	1305	26223346	0.00497648	1266	26962296	0.00469545	1141	21374961	0.00533802	1134	20608942	0.00550247	1412	20367957	0.00693246	1127
K06958 RNase adapter protein RapZ	0.0181934	0.00191398	0.01426	0.000971173	0.000604284	0.0117032	0.0039334	0.00213484	0.00573196	7361	38517452	0.0191108	5358	28642163	0.0187067	5185	26103837	0.019863	5194	27161364	0.0191228	4561	22945505	0.0198775	4137	22183832	0.0186487	4276	26358245	0.0162226	4021	28730741	0.0139955	3345	26223346	0.0127558	3862	26962296	0.0143237	3047	21374961	0.014255	2647	20608942	0.0128439	3194	20367957	0.0156815	2711
K15789 threonine 3-dehydrogenase [EC:1.1.1.103]	0.00830558	0.00184568	0.00449401	0.000809011	0.000605511	0.0117069	0.00381157	0.00210467	0.00551846	4206	38517452	0.0109197	2832	28642163	0.00988752	2559	26103837	0.00980316	2465	27161364	0.00907539	1829	22945505	0.00797106	1650	22183832	0.00743785	1610	26358245	0.00610815	1506	28730741	0.00524177	1013	26223346	0.00386297	1071	26962296	0.00397221	936	21374961	0.00437896	610	20608942	0.00295988	977	20367957	0.00479675	965
K10216 2-hydroxymuconate-semialdehyde hydrolase [EC:3.7.1.9]	0.0107166	0.000871149	0.00887376	0.00064389	0.000608735	0.0117091	0.00184286	0.000957551	0.00272817	3953	38517452	0.0102629	2594	28642163	0.00905658	2748	26103837	0.0105272	3076	27161364	0.0113249	2439	22945505	0.0106295	2344	22183832	0.0105663	2912	26358245	0.0110478	3539	28730741	0.0123178	2254	26223346	0.00859539	2465	26962296	0.0091424	1835	21374961	0.00858481	1752	20608942	0.00850116	1569	20367957	0.00770328	1705
K10439 ribose transport system substrate-binding protein	0.0613656	0.00560526	0.0761138	0.00677161	0.000608261	0.0117199	-0.0147482	-0.0218977	-0.0075987	25926	38517452	0.0673097	19114	28642163	0.0667338	16938	26103837	0.064887	17576	27161364	0.0647096	11875	22945505	0.0517531	11753	22183832	0.05298	15976	26358245	0.060611	17796	28730741	0.0619406	21659	26223346	0.0825943	22310	26962296	0.0827452	18475	21374961	0.0864329	16130	20608942	0.078267	14384	20367957	0.0706207	12832
K19126 CRISPR system Cascade subunit CasE	0.00165429	0.000477617	0.000659721	0.000321031	0.000607659	0.0117283	0.000994571	0.000521736	0.00146741	897	38517452	0.00232881	677	28642163	0.00236365	446	26103837	0.00170856	288	27161364	0.00106033	343	22945505	0.00149485	290	22183832	0.00130726	495	26358245	0.00187797	314	28730741	0.00109291	130	26223346	0.000495741	176	26962296	0.000652763	68	21374961	0.000318129	86	20608942	0.000417295	102	20367957	0.000500787	93
K07178 RIO kinase 1 [EC:2.7.11.1]	0.00313083	0.00117225	0.000573892	0.000190766	0.000614106	0.0117723	0.00255694	0.00150619	0.00360769	1773	38517452	0.00460311	1006	28642163	0.0035123	1166	26103837	0.00446678	1186	27161364	0.0043665	592	22945505	0.00258003	386	22183832	0.00174001	538	26358245	0.00204111	499	28730741	0.00173682	117	26223346	0.000446167	182	26962296	0.000675017	47	21374961	0.000219883	76	20608942	0.000368772	155	20367957	0.000760999	141
K00370 nitrate reductase / nitrite oxidoreductase, alpha subunit [EC:1.7.5.1 1.7.99.-]	0.00733337	0.00281945	0.00140401	0.000900504	0.000616993	0.0118076	0.00592936	0.00337157	0.00848716	3931	38517452	0.0102058	2691	28642163	0.00939524	2813	26103837	0.0107762	2248	27161364	0.00827646	1862	22945505	0.00811488	1223	22183832	0.00551302	773	26358245	0.00293267	992	28730741	0.00345275	336	26223346	0.0012813	323	26962296	0.00119797	138	21374961	0.000645615	112	20608942	0.000543453	231	20367957	0.00113413	115
K03698 3'-5' exoribonuclease [EC:3.1.-.-]	0.0217011	0.00211397	0.0263996	0.00187158	0.000622031	0.0118838	-0.00469849	-0.00699047	-0.00240652	7369	38517452	0.0191316	5191	28642163	0.0181236	5756	26103837	0.0220504	5582	27161364	0.0205513	5539	22945505	0.0241398	5381	22183832	0.0242564	6112	26358245	0.0231882	6369	28730741	0.0221679	7137	26223346	0.0272162	7311	26962296	0.0271156	6203	21374961	0.0290199	5696	20608942	0.0276385	5461	20367957	0.0268117	4806
K00102 D-lactate dehydrogenase (cytochrome) [EC:1.1.2.4]	0.0278872	0.00495712	0.0177114	0.00296773	0.000624358	0.0119082	0.0101757	0.00539217	0.0149593	11164	38517452	0.0289843	8565	28642163	0.0299035	8778	26103837	0.0336272	8950	27161364	0.0329512	6963	22945505	0.0303458	5695	22183832	0.0256718	4620	26358245	0.0175277	6920	28730741	0.0240857	4110	26223346	0.0156731	4217	26962296	0.0156404	3347	21374961	0.0156585	3187	20608942	0.0154642	3601	20367957	0.0176797	2912
K22133 oxalate---CoA ligase [EC:6.2.1.8]	0.00614119	0.00196747	0.00211715	0.0010071	0.000625668	0.011913	0.00402404	0.00217307	0.00587501	2304	38517452	0.0059817	1656	28642163	0.00578169	2417	26103837	0.00925918	2294	27161364	0.00844582	1616	22945505	0.00704277	1239	22183832	0.00558515	752	26358245	0.002853	1201	28730741	0.00418019	288	26223346	0.00109826	292	26962296	0.00108299	211	21374961	0.000987136	292	20608942	0.00141686	653	20367957	0.00320602	465
K15523 protein-ribulosamine 3-kinase [EC:2.7.1.172]	0.00187324	0.000507623	0.000706041	0.000488556	0.000626791	0.0119143	0.00116719	0.000595983	0.0017384	661	38517452	0.00171611	412	28642163	0.00143844	629	26103837	0.00240961	653	27161364	0.00240415	521	22945505	0.0022706	428	22183832	0.00192933	217	26358245	0.000823272	573	28730741	0.00199438	80	26223346	0.000305072	125	26962296	0.00046361	83	21374961	0.000388305	61	20608942	0.000295988	148	20367957	0.000726632	78
K01424 L-asparaginase [EC:3.5.1.1]	0.0161763	0.00247561	0.0108805	0.00195173	0.000629001	0.0119362	0.00529575	0.00272708	0.00786441	7106	38517452	0.0184488	5128	28642163	0.0179037	4972	26103837	0.019047	4924	27161364	0.0181287	3732	22945505	0.0162646	3204	22183832	0.014443	3275	26358245	0.012425	3663	28730741	0.0127494	2336	26223346	0.00890809	2729	26962296	0.0101215	1804	21374961	0.00843978	1909	20608942	0.00926297	2522	20367957	0.0123822	1925
K00038 3alpha(or 20beta)-hydroxysteroid dehydrogenase [EC:1.1.1.53]	0.00847663	0.00150243	0.00534451	0.000514409	0.000633093	0.0119536	0.00313212	0.00176511	0.00449913	2936	38517452	0.00762252	1600	28642163	0.00558617	2623	26103837	0.0100483	2558	27161364	0.00941779	2372	22945505	0.0103375	1975	22183832	0.00890288	2317	26358245	0.00879042	2042	28730741	0.00710737	1364	26223346	0.00520147	1332	26962296	0.00494023	1038	21374961	0.00485615	962	20608942	0.00466788	1149	20367957	0.00564121	978
K06951 uncharacterized protein	0.0191942	0.0012708	0.0228928	0.00176656	0.000634228	0.011955	-0.00369864	-0.00547963	-0.00191765	7288	38517452	0.0189213	5273	28642163	0.0184099	4698	26103837	0.0179974	4910	27161364	0.0180771	4395	22945505	0.0191541	4113	22183832	0.0185405	5422	26358245	0.0205704	6287	28730741	0.0218825	5831	26223346	0.0222359	5672	26962296	0.0210368	4499	21374961	0.021048	4262	20608942	0.0206803	5109	20367957	0.0250835	4578
K00986 RNA-directed DNA polymerase [EC:2.7.7.49]	0.190002	0.0198437	0.148318	0.00603527	0.00063587	0.011966	0.0416836	0.0237132	0.059654	74960	38517452	0.194613	59437	28642163	0.207516	55159	26103837	0.211306	58164	27161364	0.214142	43110	22945505	0.18788	40685	22183832	0.183399	42778	26358245	0.162295	45642	28730741	0.158861	40724	26223346	0.155297	41036	26962296	0.152198	29382	21374961	0.13746	28830	20608942	0.139891	31041	20367957	0.152401	26609
K07226 heme iron utilization protein	0.00321278	0.000680204	0.00151359	0.000764726	0.000632783	0.0119678	0.00169919	0.000868455	0.00252993	830	38517452	0.00215487	657	28642163	0.00229382	1113	26103837	0.00426374	988	27161364	0.00363752	846	22945505	0.003687	729	22183832	0.00328618	753	26358245	0.00285679	1012	28730741	0.00352236	300	26223346	0.00114402	304	26962296	0.0011275	224	21374961	0.00104796	195	20608942	0.000946191	254	20367957	0.00124706	171
K05919 superoxide reductase [EC:1.15.1.2]	0.0107318	0.0023955	0.0157013	0.000882218	0.00063241	0.0119808	-0.00496951	-0.00715728	-0.00278174	3099	38517452	0.0080457	2623	28642163	0.00915783	2264	26103837	0.00867305	2348	27161364	0.00864463	2583	22945505	0.0112571	2604	22183832	0.0117383	3428	26358245	0.0130054	4405	28730741	0.015332	4278	26223346	0.0163137	4156	26962296	0.0154141	3580	21374961	0.0167486	3399	20608942	0.0164928	2797	20367957	0.0137324	2764
K00954 pantetheine-phosphate adenylyltransferase [EC:2.7.7.3]	0.0283891	0.00100988	0.030523	0.000271652	0.000644963	0.0120968	-0.00213391	-0.00304525	-0.00122257	10907	38517452	0.028317	8103	28642163	0.0282905	7164	26103837	0.0274442	7410	27161364	0.0272814	6503	22945505	0.0283411	6212	22183832	0.0280024	7548	26358245	0.0286362	8849	28730741	0.0307998	7866	26223346	0.0299962	8222	26962296	0.0304944	6581	21374961	0.0307884	6264	20608942	0.0303946	6214	20367957	0.0305087	5520
K09921 uncharacterized protein	0.00134172	0.000522782	0.000273863	0.000238833	0.000646039	0.0120969	0.00106786	0.000582482	0.00155323	562	38517452	0.00145908	334	28642163	0.00116611	548	26103837	0.00209931	507	27161364	0.00186662	409	22945505	0.00178248	250	22183832	0.00112695	159	26358245	0.000603227	181	28730741	0.000629987	6	26223346	2.28804e-05	0	26962296	0	25	21374961	0.000116959	4	20608942	1.94091e-05	113	20367957	0.000554793	101
K00260 glutamate dehydrogenase [EC:1.4.1.2]	0.00212072	0.000817834	0.00516976	0.00149648	0.00064452	0.0121086	-0.00304905	-0.00447032	-0.00162777	557	38517452	0.0014461	307	28642163	0.00107185	428	26103837	0.00163961	411	27161364	0.00151318	564	22945505	0.002458	516	22183832	0.00232602	985	26358245	0.00373697	797	28730741	0.00277403	1315	26223346	0.00501462	1051	26962296	0.00389804	1191	21374961	0.00557194	951	20608942	0.0046145	1064	20367957	0.00522389	1013
K00231 protoporphyrinogen/coproporphyrinogen III oxidase [EC:1.3.3.4 1.3.3.15]	0.020185	0.00363918	0.0126639	0.00133974	0.000649018	0.0121325	0.00752115	0.00419762	0.0108447	7332	38517452	0.0190355	4675	28642163	0.0163221	6278	26103837	0.0240501	6164	27161364	0.022694	5713	22945505	0.0248981	5047	22183832	0.0227508	4467	26358245	0.0169473	4247	28730741	0.0147821	3145	26223346	0.0119931	2947	26962296	0.0109301	2452	21374961	0.0114714	2822	20608942	0.0136931	2898	20367957	0.0142282	2606
K16887 quinone-modifying oxidoreductase, subunit QmoC	0.00494512	0.00100424	0.00290233	0.000523678	0.000650995	0.0121494	0.00204278	0.00109561	0.00298995	2012	38517452	0.00522361	1574	28642163	0.0054954	1370	26103837	0.00524827	1646	27161364	0.00606008	1194	22945505	0.00520363	1223	22183832	0.00551302	1106	26358245	0.00419603	753	28730741	0.00262089	818	26223346	0.00311936	615	26962296	0.00228096	645	21374961	0.00301755	751	20608942	0.00364405	669	20367957	0.00328457	588
K01875 seryl-tRNA synthetase [EC:6.1.1.11]	0.0643782	0.00203463	0.0689229	0.00185556	0.000657398	0.0122486	-0.00454471	-0.00677877	-0.00231065	24895	38517452	0.064633	19058	28642163	0.0665383	16401	26103837	0.0628298	17011	27161364	0.0626294	14795	22945505	0.0644789	13806	22183832	0.0622345	16656	26358245	0.0631909	19678	28730741	0.0684911	17668	26223346	0.0673751	18549	26962296	0.0687961	14974	21374961	0.0700539	14911	20608942	0.0723521	13969	20367957	0.0685832	12731
K06163 alpha-D-ribose 1-methylphosphonate 5-phosphate C-P lyase [EC:4.7.1.1]	0.000678436	0.000247733	0.000153651	6.04821e-05	0.000658608	0.012251	0.000524785	0.000301687	0.000747882	173	38517452	0.000449147	134	28642163	0.000467842	258	26103837	0.00098836	290	27161364	0.00106769	202	22945505	0.000880347	150	22183832	0.000676168	122	26358245	0.000462853	125	28730741	0.000435074	22	26223346	8.38947e-05	49	26962296	0.000181735	15	21374961	7.01756e-05	21	20608942	0.000101898	32	20367957	0.00015711	29
K06186 outer membrane protein assembly factor BamE	0.000957429	0.000379045	0.000184148	0.000231104	0.000661258	0.01228	0.000773281	0.000406185	0.00114038	333	38517452	0.000864543	267	28642163	0.000932192	441	26103837	0.00168941	323	27161364	0.00118919	270	22945505	0.0011767	162	22183832	0.000730262	83	26358245	0.000314892	219	28730741	0.00076225	0	26223346	0	14	26962296	5.19244e-05	0	21374961	0	9	20608942	4.36704e-05	54	20367957	0.000265122	0
K03762 MFS transporter, MHS family, proline/betaine transporter	0.00206543	0.000521785	0.000998917	0.000330263	0.000667463	0.0123142	0.00106651	0.000557175	0.00157584	825	38517452	0.00214189	666	28642163	0.00232524	789	26103837	0.00302254	631	27161364	0.00232315	382	22945505	0.00166481	368	22183832	0.00165887	312	26358245	0.00118369	633	28730741	0.00220322	245	26223346	0.000934282	274	26962296	0.00101623	185	21374961	0.000865499	176	20608942	0.000853998	121	20367957	0.00059407	127
K17263 cullin-associated NEDD8-dissociated protein 1	0.00250271	0.00106055	0.000275833	0.000290851	0.00066652	0.012317	0.00222687	0.00126935	0.00318439	1020	38517452	0.00264815	771	28642163	0.00269184	1206	26103837	0.00462001	841	27161364	0.00309631	476	22945505	0.00207448	586	22183832	0.00264156	236	26358245	0.000895356	389	28730741	0.00135395	8	26223346	3.05072e-05	15	26962296	5.56332e-05	0	21374961	0	31	20608942	0.00015042	77	20367957	0.000378045	21
K11168 dehydrogenase/reductase SDR family member 12 [EC:1.1.-.-]	0.00399573	0.00153082	0.00081492	0.000492696	0.000666018	0.0123279	0.00318081	0.00179164	0.00456998	979	38517452	0.0025417	552	28642163	0.00192723	1653	26103837	0.0063324	1444	27161364	0.00531638	1212	22945505	0.00528208	925	22183832	0.0041697	1119	26358245	0.00424535	618	28730741	0.00215101	62	26223346	0.000236431	79	26962296	0.000293002	62	21374961	0.000290059	106	20608942	0.00051434	300	20367957	0.0014729	226
K11962 urea transport system ATP-binding protein	0.00124803	0.000346973	0.000527851	0.000113505	0.000665874	0.0123455	0.000720176	0.000405104	0.00103525	471	38517452	0.00122282	235	28642163	0.000820469	428	26103837	0.00163961	442	27161364	0.00162731	338	22945505	0.00147306	333	22183832	0.00150109	182	26358245	0.000690486	290	28730741	0.00100937	98	26223346	0.000373713	116	26962296	0.00043023	125	21374961	0.000584796	118	20608942	0.000572567	104	20367957	0.000510606	72
K13409 ATP-binding cassette, subfamily B, bacterial RaxB	0.00231951	0.000859714	0.00057405	0.000506414	0.000675057	0.012434	0.00174546	0.000918401	0.00257252	646	38517452	0.00167716	450	28642163	0.00157111	958	26103837	0.00366996	853	27161364	0.00314049	715	22945505	0.00311608	534	22183832	0.00240716	272	26358245	0.00103194	558	28730741	0.00194217	147	26223346	0.000560569	57	26962296	0.000211406	38	21374961	0.000177778	56	20608942	0.000271727	90	20367957	0.000441871	17
K07236 tRNA 2-thiouridine synthesizing protein C	0.000493225	0.00011951	0.000245274	8.55431e-05	0.000677614	0.0124608	0.000247951	0.000127637	0.000368266	231	38517452	0.000599728	162	28642163	0.0005656	173	26103837	0.000662738	125	27161364	0.000460213	129	22945505	0.000562202	67	22183832	0.000302022	88	26358245	0.000333861	132	28730741	0.000459438	81	26223346	0.000308885	61	26962296	0.000226242	45	21374961	0.000210527	36	20608942	0.000174681	15	20367957	7.36451e-05	55
K09720 HTH-type transcriptional regulator, global nitrogen regulator NrpRI	0.0221359	0.00605589	0.0343842	0.00320306	0.000679519	0.0124755	-0.0122482	-0.0179715	-0.00652495	7254	38517452	0.018833	6307	28642163	0.02202	3380	26103837	0.0129483	3994	27161364	0.0147047	5269	22945505	0.0229631	5825	22183832	0.0262579	7196	26358245	0.0273008	9211	28730741	0.0320597	8173	26223346	0.0311669	8799	26962296	0.0326345	7243	21374961	0.0338854	7732	20608942	0.0375177	7554	20367957	0.0370877	7237
K02867 large subunit ribosomal protein L11	0.0274636	0.00149742	0.0305216	0.000594584	0.000681245	0.0124869	-0.00305809	-0.00443212	-0.00168406	10477	38517452	0.0272007	7997	28642163	0.0279204	6650	26103837	0.0254752	7060	27161364	0.0259928	6269	22945505	0.0273213	6034	22183832	0.0272	7318	26358245	0.0277636	8859	28730741	0.0308346	7849	26223346	0.0299313	8275	26962296	0.030691	6668	21374961	0.0311954	6530	20608942	0.0316853	6079	20367957	0.0298459	5460
K00611 ornithine carbamoyltransferase [EC:2.1.3.3]	0.0480134	0.00262881	0.0536465	0.00216391	0.000686343	0.01256	-0.00563309	-0.00840285	-0.00286332	18031	38517452	0.0468125	13735	28642163	0.0479538	11624	26103837	0.0445299	12080	27161364	0.0444749	10977	22945505	0.0478394	10903	22183832	0.0491484	13428	26358245	0.0509442	15056	28730741	0.0524038	13776	26223346	0.0525333	14399	26962296	0.0534042	11696	21374961	0.0547182	10729	20608942	0.0520599	10803	20367957	0.0530392	10630
K03043 DNA-directed RNA polymerase subunit beta [EC:2.7.7.6]	0.201692	0.00907147	0.220691	0.00238667	0.000688666	0.0125821	-0.0189995	-0.0271815	-0.0108175	78004	38517452	0.202516	60099	28642163	0.209827	49865	26103837	0.191026	51905	27161364	0.191099	45909	22945505	0.200078	43691	22183832	0.19695	53217	26358245	0.201899	63248	28730741	0.220141	57545	26223346	0.219442	59123	26962296	0.21928	46776	21374961	0.218835	45632	20608942	0.221418	44334	20367957	0.217665	39942
K19147 5-methylcytosine-specific restriction enzyme subunit McrC	0.00231511	0.000694243	0.000904212	0.000290034	0.000690638	0.0125977	0.0014109	0.000771455	0.00205034	1054	38517452	0.00273642	755	28642163	0.00263597	666	26103837	0.00255135	819	27161364	0.00301531	592	22945505	0.00258003	601	22183832	0.00270918	352	26358245	0.00133545	275	28730741	0.000957163	133	26223346	0.000507182	180	26962296	0.000667599	178	21374961	0.00083275	161	20608942	0.000781214	208	20367957	0.00102121	262
K15635 2,3-bisphosphoglycerate-independent phosphoglycerate mutase [EC:5.4.2.12]	0.0685349	0.00655795	0.0817612	0.00334617	0.00069427	0.0126029	-0.0132263	-0.0193933	-0.00705927	26516	38517452	0.0688415	20382	28642163	0.0711608	15088	26103837	0.0577999	16116	27161364	0.0593343	15691	22945505	0.0683838	15879	22183832	0.0715792	18932	26358245	0.0718257	22799	28730741	0.079354	20641	26223346	0.0787123	21154	26962296	0.0784577	18191	21374961	0.0851042	17422	20608942	0.0845361	16638	20367957	0.0816871	15817
K05562 multicomponent K+	0.000687899	0.000277062	0.000119086	9.78113e-05	0.000692054	0.0126032	0.000568813	0.000316349	0.000821278	256	38517452	0.000664634	134	28642163	0.000467842	301	26103837	0.00115309	250	27161364	0.000920425	209	22945505	0.000910854	156	22183832	0.000703215	103	26358245	0.00039077	84	28730741	0.00029237	4	26223346	1.52536e-05	14	26962296	5.19244e-05	28	21374961	0.000130994	3	20608942	1.45568e-05	26	20367957	0.000127651	12
K08683 3-hydroxyacyl-CoA dehydrogenase / 3-hydroxy-2-methylbutyryl-CoA dehydrogenase [EC:1.1.1.35 1.1.1.178]	0.00551857	0.00169805	0.00208968	0.000812851	0.000693859	0.0126157	0.00342889	0.00184449	0.00501329	1807	38517452	0.00469138	1192	28642163	0.0041617	1680	26103837	0.00643584	1709	27161364	0.00629203	1884	22945505	0.00821076	1598	22183832	0.00720344	1169	26358245	0.00443504	781	28730741	0.00271834	314	26223346	0.00119741	356	26962296	0.00132036	359	21374961	0.00167954	292	20608942	0.00141686	743	20367957	0.00364789	510
K02203 phosphoserine / homoserine phosphotransferase [EC:3.1.3.3 2.7.1.39]	0.00153229	0.000453565	0.000593256	0.000136666	0.000702202	0.0126452	0.000939036	0.000528415	0.00134966	657	38517452	0.00170572	351	28642163	0.00122547	592	26103837	0.00226787	575	27161364	0.00211698	281	22945505	0.00122464	246	22183832	0.00110892	439	26358245	0.00166551	271	28730741	0.000943241	174	26223346	0.000663531	211	26962296	0.000782574	80	21374961	0.00037427	131	20608942	0.000635646	92	20367957	0.00045169	82
K06148 ATP-binding cassette, subfamily C, bacterial	0.00784031	0.000963064	0.00402206	0.00189462	0.000698317	0.012656	0.00381825	0.00203746	0.00559903	3587	38517452	0.00931266	2214	28642163	0.00772986	2265	26103837	0.00867689	2053	27161364	0.00755853	2023	22945505	0.00881654	1437	22183832	0.00647769	1994	26358245	0.007565	1892	28730741	0.00658528	941	26223346	0.00358841	1065	26962296	0.00394996	560	21374961	0.00261989	682	20608942	0.00330924	567	20367957	0.00278378	312
K00794 6,7-dimethyl-8-ribityllumazine synthase [EC:2.5.1.78]	0.022185	0.000891001	0.0242794	0.000921036	0.000701689	0.0126562	-0.00209445	-0.00313339	-0.00105551	8313	38517452	0.0215824	5957	28642163	0.020798	5595	26103837	0.0214336	5978	27161364	0.0220092	5338	22945505	0.0232638	4979	22183832	0.0224443	5870	26358245	0.0222701	6803	28730741	0.0236785	6159	26223346	0.0234867	6337	26962296	0.0235032	5313	21374961	0.0248562	5102	20608942	0.0247562	4854	20367957	0.0238316	4749
K07062 toxin FitB [EC:3.1.-.-]	0.00777231	0.00219573	0.00334973	0.00115174	0.00070065	0.0126577	0.00442259	0.00234992	0.00649525	2868	38517452	0.00744598	1921	28642163	0.0067069	2883	26103837	0.0110444	2807	27161364	0.0103345	2094	22945505	0.00912597	1755	22183832	0.00791117	1410	26358245	0.00534937	1224	28730741	0.00426025	761	26223346	0.00290199	719	26962296	0.00266669	384	21374961	0.00179649	507	20608942	0.0024601	1147	20367957	0.00563139	827
K11529 glycerate 2-kinase [EC:2.7.1.165]	0.0320099	0.0028724	0.025934	0.00227976	0.000700178	0.0126694	0.00607593	0.0030887	0.00906316	13615	38517452	0.0353476	9726	28642163	0.0339569	9204	26103837	0.0352592	9440	27161364	0.0347553	6505	22945505	0.0283498	6527	22183832	0.0294223	7685	26358245	0.029156	8571	28730741	0.0298322	6727	26223346	0.0256527	6582	26962296	0.0244119	4936	21374961	0.0230924	4984	20608942	0.0241837	5144	20367957	0.0252554	4621
K07814 putative two-component system response regulator	0.200509	0.00687599	0.216123	0.00664088	0.000705694	0.0126879	-0.0156136	-0.0233637	-0.00786338	75612	38517452	0.196306	57616	28642163	0.201158	52373	26103837	0.200633	57027	27161364	0.209956	43036	22945505	0.187557	43303	22183832	0.195201	54483	26358245	0.206702	59346	28730741	0.206559	57837	26223346	0.220555	57771	26962296	0.214266	47466	21374961	0.222064	44571	20608942	0.21627	45071	20367957	0.221284	40098
K02357 elongation factor Ts	0.036562	0.00143626	0.0394485	0.000737878	0.000712376	0.0127877	-0.00288647	-0.00423834	-0.0015346	14228	38517452	0.0369391	10383	28642163	0.0362508	9327	26103837	0.0357304	9500	27161364	0.0349762	8491	22945505	0.0370051	7918	22183832	0.0356927	9468	26358245	0.0359204	11487	28730741	0.0399816	10163	26223346	0.0387555	10793	26962296	0.04003	8342	21374961	0.039027	8157	20608942	0.0395799	7991	20367957	0.0392332	6944
K17317 glucose/mannose transport system permease protein	0.00360293	0.000420428	0.00527208	0.000830815	0.000714681	0.0128087	-0.00166915	-0.00244959	-0.000888713	1265	38517452	0.00328423	929	28642163	0.00324347	884	26103837	0.00338648	829	27161364	0.00305213	963	22945505	0.0041969	832	22183832	0.00375048	1128	26358245	0.0042795	1043	28730741	0.00363026	1507	26223346	0.00574679	1494	26962296	0.00554107	1392	21374961	0.00651229	918	20608942	0.00445438	1186	20367957	0.00582287	1042
K10590 E3 ubiquitin-protein ligase TRIP12 [EC:2.3.2.26]	0.00138844	0.000605598	0.000108503	0.000116621	0.000717933	0.0128466	0.00127994	0.000736353	0.00182352	438	38517452	0.00113715	333	28642163	0.00116262	568	26103837	0.00217593	548	27161364	0.00201757	462	22945505	0.00201347	332	22183832	0.00149659	136	26358245	0.000515968	169	28730741	0.00058822	0	26223346	0	0	26962296	0	4	21374961	1.87135e-05	15	20608942	7.27839e-05	26	20367957	0.000127651	14
K01939 adenylosuccinate synthase [EC:6.3.4.4]	0.0625472	0.00328364	0.0691361	0.00178079	0.000722269	0.0128833	-0.00658897	-0.00970387	-0.00347407	24503	38517452	0.0636153	18232	28642163	0.0636544	15275	26103837	0.0585163	16021	27161364	0.0589845	14088	22945505	0.0613976	13516	22183832	0.0609273	16786	26358245	0.0636841	19996	28730741	0.0695979	18468	26223346	0.0704258	18098	26962296	0.0671234	14974	21374961	0.0700539	13877	20608942	0.0673348	14033	20367957	0.0688974	13109
K13695 probable lipoprotein NlpC	0.0016091	0.000354748	0.000805283	0.00034296	0.000721162	0.0128839	0.000803819	0.00040378	0.00120386	472	38517452	0.00122542	403	28642163	0.00140702	483	26103837	0.0018503	512	27161364	0.00188503	366	22945505	0.00159508	501	22183832	0.0022584	409	26358245	0.0015517	316	28730741	0.00109987	171	26223346	0.000652091	147	26962296	0.000545206	160	21374961	0.000748539	182	20608942	0.000883112	288	20367957	0.00141399	231
K04075 tRNA(Ile)-lysidine synthase [EC:6.3.4.19]	0.0596895	0.00393944	0.0678708	0.00101821	0.000731734	0.0129296	-0.00818134	-0.0117331	-0.00462957	21949	38517452	0.0569846	16117	28642163	0.0562702	14402	26103837	0.055172	15789	27161364	0.0581304	13621	22945505	0.0593624	13431	22183832	0.0605441	16591	26358245	0.0629443	19568	28730741	0.0681082	17466	26223346	0.0666048	18117	26962296	0.0671938	14955	21374961	0.069965	13785	20608942	0.0668884	13991	20367957	0.0686912	12283
K11392 16S rRNA (cytosine1407-C5)-methyltransferase [EC:2.1.1.178]	0.00360478	0.000995431	0.00158662	0.000372056	0.000734724	0.0129419	0.00201816	0.00110827	0.00292804	2061	38517452	0.00535082	1248	28642163	0.00435721	1152	26103837	0.00441314	932	27161364	0.00343134	708	22945505	0.00308557	744	22183832	0.00335379	771	26358245	0.00292508	552	28730741	0.00192129	455	26223346	0.0017351	649	26962296	0.00240707	297	21374961	0.00138948	227	20608942	0.00110146	356	20367957	0.00174784	268
K13853 3-deoxy-7-phosphoheptulonate synthase / chorismate mutase [EC:2.5.1.54 5.4.99.5]	0.000309568	0.00010796	0.000662341	0.000174872	0.000726751	0.0129428	-0.000352773	-0.000522566	-0.00018298	62	38517452	0.000160966	75	28642163	0.000261852	50	26103837	0.000191543	76	27161364	0.000279809	61	22945505	0.000265847	105	22183832	0.000473318	114	26358245	0.000432502	118	28730741	0.00041071	216	26223346	0.000823694	169	26962296	0.000626801	170	21374961	0.000795323	195	20608942	0.000946191	140	20367957	0.000687354	70
K07154 serine/threonine-protein kinase HipA [EC:2.7.11.1]	0.00788539	0.00232854	0.0029175	0.000293018	0.000731644	0.0129483	0.00496789	0.00288334	0.00705244	2880	38517452	0.00747713	2117	28642163	0.0073912	2937	26103837	0.0112512	3232	27161364	0.0118993	1652	22945505	0.00719967	1392	22183832	0.00627484	1887	26358245	0.00715905	1273	28730741	0.00443079	859	26223346	0.00327571	765	26962296	0.0028373	535	21374961	0.00250293	592	20608942	0.00287254	691	20367957	0.00339258	459
K02670 twitching motility protein PilU	0.00748522	0.00198002	0.00347482	0.00129056	0.000734464	0.0129576	0.0040104	0.00206473	0.00595607	2540	38517452	0.00659441	2066	28642163	0.00721314	2744	26103837	0.0105119	2532	27161364	0.00932206	2102	22945505	0.00916084	1641	22183832	0.00739728	1075	26358245	0.00407842	1610	28730741	0.00560375	644	26223346	0.00245583	683	26962296	0.00253317	548	21374961	0.00256375	440	20608942	0.002135	1164	20367957	0.00571486	976
K07714 two-component system, NtrC family, response regulator AtoC	0.119408	0.00570998	0.107902	0.00240141	0.000731579	0.0129674	0.0115051	0.00624304	0.0167672	45034	38517452	0.116918	33094	28642163	0.115543	31943	26103837	0.122369	32724	27161364	0.12048	26982	22945505	0.117592	29091	22183832	0.131136	31918	26358245	0.121093	31641	28730741	0.110129	27817	26223346	0.106077	29487	26962296	0.109364	23022	21374961	0.107705	21671	20608942	0.105153	21626	20367957	0.106177	19853
K00899 5-methylthioribose kinase [EC:2.7.1.100]	0.00127022	0.000542128	0.000113134	5.99015e-05	0.000740111	0.0129761	0.00115709	0.00067196	0.00164221	581	38517452	0.00150841	359	28642163	0.0012534	530	26103837	0.00203035	529	27161364	0.00194762	282	22945505	0.001229	262	22183832	0.00118104	186	26358245	0.000705662	88	28730741	0.000306292	28	26223346	0.000106775	16	26962296	5.93421e-05	27	21374961	0.000126316	3	20608942	1.45568e-05	29	20367957	0.000142381	30
K05815 sn-glycerol 3-phosphate transport system permease protein	0.00714697	0.000897809	0.00532748	0.00033414	0.000738112	0.0129814	0.00181949	0.000999043	0.00263994	2379	38517452	0.00617642	1964	28642163	0.00685702	2045	26103837	0.0078341	2175	27161364	0.0080077	1813	22945505	0.00790133	1680	22183832	0.00757308	1978	26358245	0.00750429	1529	28730741	0.00532183	1439	26223346	0.00548748	1342	26962296	0.00497732	1018	21374961	0.00476258	1057	20608942	0.00512884	1160	20367957	0.00569522	955
K00928 aspartate kinase [EC:2.7.2.4]	0.0603723	0.0051866	0.0708292	0.00215739	0.000731399	0.0129846	-0.0104569	-0.0152325	-0.00568136	22266	38517452	0.0578076	16476	28642163	0.0575236	13840	26103837	0.053019	14517	27161364	0.0534472	15012	22945505	0.0654246	14253	22183832	0.0642495	17308	26358245	0.0656645	18917	28730741	0.0658424	18852	26223346	0.0718901	18996	26962296	0.0704539	15946	21374961	0.0746013	14814	20608942	0.0718814	13874	20367957	0.0681168	13055
K10220 4-oxalmesaconate hydratase [EC:4.2.1.83]	0.000754942	0.000185422	0.000291352	0.00021451	0.000730614	0.0129911	0.00046359	0.000233284	0.000693896	346	38517452	0.000898294	213	28642163	0.000743659	277	26103837	0.00106115	210	27161364	0.000773157	135	22945505	0.000588351	88	22183832	0.000396685	216	26358245	0.000819478	218	28730741	0.000758769	23	26223346	8.77081e-05	0	26962296	0	35	21374961	0.000163743	73	20608942	0.000354215	49	20367957	0.000240574	51
K21832 glycine betaine catabolism B	0.00618878	0.0017597	0.00266916	0.000836334	0.000744453	0.0129917	0.00351962	0.00187902	0.00516022	1736	38517452	0.00450705	1225	28642163	0.00427691	2123	26103837	0.0081329	2021	27161364	0.00744072	2043	22945505	0.0089037	1499	22183832	0.00675717	1445	26358245	0.00548216	1152	28730741	0.00400964	396	26223346	0.0015101	506	26962296	0.00187669	483	21374961	0.00225965	382	20608942	0.00185356	783	20367957	0.00384427	621
K19967 D-threonine aldolase [EC:4.1.2.42]	0.00685344	0.00138643	0.00407971	0.00076085	0.00073986	0.0129918	0.00277372	0.00145611	0.00409133	1951	38517452	0.00506524	1271	28642163	0.00443751	1964	26103837	0.0075238	2036	27161364	0.00749594	1975	22945505	0.00860735	1585	22183832	0.00714484	2179	26358245	0.00826686	1806	28730741	0.00628595	1110	26223346	0.00423287	917	26962296	0.00340105	828	21374961	0.00387369	780	20608942	0.00378476	663	20367957	0.00325511	657
K09769 uncharacterized protein	0.0306166	0.00344893	0.0378692	0.0006574	0.00074251	0.012998	-0.00725259	-0.010348	-0.00415716	12185	38517452	0.031635	9395	28642163	0.0328013	7351	26103837	0.0281606	7673	27161364	0.0282497	6030	22945505	0.0262797	6181	22183832	0.0278626	8536	26358245	0.0323846	10791	28730741	0.0375591	10049	26223346	0.0383208	10039	26962296	0.0372335	7953	21374961	0.0372071	7798	20608942	0.0378379	7514	20367957	0.0368913	6972
K07116 acyl-homoserine-lactone acylase [EC:3.5.1.97]	0.00584927	0.001347	0.00313737	0.000549791	0.000743866	0.0130015	0.0027119	0.00147344	0.00395036	1652	38517452	0.00428896	1537	28642163	0.00536621	2005	26103837	0.00768086	2200	27161364	0.00809974	1228	22945505	0.00535181	1235	22183832	0.00556712	1659	26358245	0.00629405	1191	28730741	0.00414539	897	26223346	0.00342062	743	26962296	0.0027557	462	21374961	0.00216141	546	20608942	0.00264934	783	20367957	0.00384427	574
K01420 CRP/FNR family transcriptional regulator, anaerobic regulatory protein	0.00801829	0.00175789	0.00438022	0.00131937	0.000747332	0.0130218	0.00363807	0.00184317	0.00543297	2982	38517452	0.00774195	2010	28642163	0.00701763	2775	26103837	0.0106306	3023	27161364	0.0111298	1818	22945505	0.00792312	1530	22183832	0.00689691	1537	26358245	0.00583119	2004	28730741	0.00697511	1336	26223346	0.0050947	1165	26962296	0.00432085	798	21374961	0.00373334	879	20608942	0.00426514	557	20367957	0.00273469	448
K09941 uncharacterized protein	0.000939015	0.000402304	0.000123541	0.000144359	0.000748692	0.0130254	0.000815473	0.000448577	0.00118237	312	38517452	0.000810022	210	28642163	0.000733185	440	26103837	0.00168558	358	27161364	0.00131805	239	22945505	0.0010416	234	22183832	0.00105482	107	26358245	0.000405945	133	28730741	0.000462919	0	26223346	0	14	26962296	5.19244e-05	0	21374961	0	2	20608942	9.70453e-06	37	20367957	0.000181658	7
K08762 diazepam-binding inhibitor (GABA receptor modulator, acyl-CoA-binding protein)	0.000684189	0.00028882	8.67136e-05	7.38712e-05	0.000753	0.0130802	0.000597476	0.000337136	0.000857816	266	38517452	0.000690596	208	28642163	0.000726202	288	26103837	0.00110329	273	27161364	0.0010051	186	22945505	0.000810616	139	22183832	0.000626582	65	26358245	0.000246602	76	28730741	0.000264525	25	26223346	9.53349e-05	2	26962296	7.41777e-06	6	21374961	2.80702e-05	0	20608942	0	8	20367957	3.92774e-05	31
K18930 D-lactate dehydrogenase	0.00641413	0.00217389	0.00192074	0.000554264	0.000757782	0.0131229	0.00449339	0.002534	0.00645279	2606	38517452	0.00676576	1954	28642163	0.00682211	2610	26103837	0.00999853	2201	27161364	0.00810342	1681	22945505	0.00732605	1269	22183832	0.00572038	684	26358245	0.00259501	1144	28730741	0.0039818	599	26223346	0.00228422	414	26962296	0.00153548	347	21374961	0.00162339	257	20608942	0.00124703	356	20367957	0.00174784	271
K01678 fumarate hydratase subunit beta [EC:4.2.1.2]	0.0191701	0.00393469	0.0273627	0.000875632	0.000756871	0.0131272	-0.00819262	-0.0117306	-0.00465464	6466	38517452	0.0167872	5221	28642163	0.0182284	3474	26103837	0.0133084	4032	27161364	0.0148446	4428	22945505	0.0192979	4881	22183832	0.0220025	6310	26358245	0.0239394	7169	28730741	0.0249524	6821	26223346	0.0260112	7167	26962296	0.0265816	6110	21374961	0.0285848	5840	20608942	0.0283372	5402	20367957	0.0265221	5071
K03379 cyclohexanone monooxygenase [EC:1.14.13.22]	0.0199425	0.00788924	0.0041508	0.0034042	0.000759443	0.0131315	0.0157917	0.00850576	0.0230777	3240	38517452	0.00841177	2144	28642163	0.00748547	7681	26103837	0.0294248	6970	27161364	0.0256615	5370	22945505	0.0234033	4496	22183832	0.020267	7390	26358245	0.0280368	4841	28730741	0.0168495	316	26223346	0.00120503	259	26962296	0.000960601	187	21374961	0.000874855	235	20608942	0.00114028	1268	20367957	0.00622546	824
K09768 uncharacterized protein	0.00510923	0.000740296	0.00341917	0.000737485	0.000763798	0.0131665	0.00169006	0.000842969	0.00253716	2144	38517452	0.00556631	1586	28642163	0.00553729	1454	26103837	0.00557006	1434	27161364	0.00527956	1255	22945505	0.00546948	1278	22183832	0.00576095	1016	26358245	0.00385458	1102	28730741	0.00383561	782	26223346	0.00298208	869	26962296	0.00322302	565	21374961	0.00264328	782	20608942	0.00379447	849	20367957	0.00416831	880
K16171 fumarylacetoacetate (FAA) hydrolase [EC:3.7.1.2]	0.00551476	0.00124261	0.00239934	0.00145527	0.000762673	0.0131672	0.00311543	0.00156057	0.00467028	1955	38517452	0.00507562	1916	28642163	0.00668944	1799	26103837	0.00689171	1614	27161364	0.00594226	1504	22945505	0.00655466	1290	22183832	0.00581505	934	26358245	0.00354348	1036	28730741	0.00360589	279	26223346	0.00106394	316	26962296	0.00117201	184	21374961	0.00086082	274	20608942	0.00132952	972	20367957	0.0047722	804
K00108 choline dehydrogenase [EC:1.1.99.1]	0.0130846	0.00360104	0.00591594	0.00171987	0.000769468	0.0132238	0.00716866	0.00380949	0.0105278	3902	38517452	0.0101305	2533	28642163	0.00884361	4812	26103837	0.0184341	4832	27161364	0.01779	3690	22945505	0.0160816	2822	22183832	0.012721	2993	26358245	0.0113551	2678	28730741	0.00932103	1259	26223346	0.00480107	1328	26962296	0.0049254	697	21374961	0.00326082	939	20608942	0.00455627	1444	20367957	0.00708957	1127
K18372 methyl acetate hydrolase [EC:3.1.1.-]	0.00692973	0.00136549	0.00420136	0.000821962	0.000770922	0.0132287	0.00272837	0.00140929	0.00404745	2610	38517452	0.00677615	2000	28642163	0.00698271	2356	26103837	0.00902549	2319	27161364	0.00853786	1671	22945505	0.00728247	1387	22183832	0.0062523	1655	26358245	0.00627887	1236	28730741	0.00430201	1205	26223346	0.00459514	1275	26962296	0.00472883	928	21374961	0.00434153	913	20608942	0.00443012	657	20367957	0.00322565	453
K00285 D-amino-acid dehydrogenase [EC:1.4.5.1]	0.00487321	0.00173991	0.00138031	0.000685999	0.000768894	0.0132341	0.0034929	0.00189713	0.00508867	1535	38517452	0.00398521	999	28642163	0.00348787	1917	26103837	0.00734375	1887	27161364	0.00694737	1482	22945505	0.00645878	1124	22183832	0.00506675	861	26358245	0.00326653	698	28730741	0.00242945	105	26223346	0.000400407	155	26962296	0.000574877	208	21374961	0.000973101	193	20608942	0.000936487	456	20367957	0.00223881	352
K19706 dihydroceramide fatty acyl 2-hydroxylase [EC:1.14.18.7]	0.00106932	0.000381629	0.000306706	0.000158956	0.000777631	0.0133236	0.000762611	0.000411189	0.00111403	432	38517452	0.00112157	313	28642163	0.00109279	483	26103837	0.0018503	306	27161364	0.0011266	123	22945505	0.000536053	144	22183832	0.000649121	342	26358245	0.00129751	253	28730741	0.00088059	88	26223346	0.000335579	84	26962296	0.000311546	75	21374961	0.000350878	58	20608942	0.000281431	18	20367957	8.83741e-05	10
K08151 MFS transporter, DHA1 family, tetracycline resistance protein	0.0211511	0.0027223	0.0142143	0.00328017	0.000780963	0.0133402	0.00693679	0.00347019	0.0104034	9785	38517452	0.0254041	6164	28642163	0.0215207	5889	26103837	0.0225599	6549	27161364	0.0241115	4817	22945505	0.0209932	4318	22183832	0.0194646	4890	26358245	0.0185521	4770	28730741	0.0166024	3100	26223346	0.0118215	3604	26962296	0.0133668	2364	21374961	0.0110597	1986	20608942	0.00963659	3111	20367957	0.015274	3268
K13017 UDP-2-acetamido-2-deoxy-ribo-hexuluronate aminotransferase [EC:2.6.1.98]	0.0487794	0.00194575	0.0545373	0.00284646	0.000780108	0.0133458	-0.00575784	-0.00858789	-0.0029278	17818	38517452	0.0462596	13224	28642163	0.0461697	12328	26103837	0.0472268	13376	27161364	0.0492464	11166	22945505	0.0486631	11480	22183832	0.0517494	13279	26358245	0.0503789	14521	28730741	0.0505417	14475	26223346	0.0551989	15597	26962296	0.0578474	12259	21374961	0.0573522	11672	20608942	0.0566356	11325	20367957	0.055602	9629
K01637 isocitrate lyase [EC:4.1.3.1]	0.00605471	0.00194652	0.00216708	0.000794922	0.000786062	0.013407	0.00388763	0.00209789	0.00567736	2296	38517452	0.00596093	1579	28642163	0.00551285	1773	26103837	0.0067921	1514	27161364	0.00557409	2270	22945505	0.00989301	1673	22183832	0.00754153	989	26358245	0.00375215	980	28730741	0.00341098	405	26223346	0.00154443	458	26962296	0.00169867	279	21374961	0.00130527	288	20608942	0.00139745	740	20367957	0.00363316	563
K00481 p-hydroxybenzoate 3-monooxygenase [EC:1.14.13.2]	0.000892379	0.000279095	0.000267876	0.000268924	0.000790166	0.0134162	0.000624503	0.000310273	0.000938732	301	38517452	0.000781464	219	28642163	0.000764607	310	26103837	0.00118756	404	27161364	0.00148741	156	22945505	0.000679872	128	22183832	0.000576997	225	26358245	0.000853623	232	28730741	0.000807497	18	26223346	6.86411e-05	18	26962296	6.67599e-05	9	21374961	4.21053e-05	18	20608942	8.73407e-05	50	20367957	0.000245484	42
K10670 glycine/sarcosine/betaine reductase complex component A [EC:1.21.4.2 1.21.4.3 1.21.4.4]	0.00149015	0.00028835	0.000917779	0.000162295	0.000788992	0.0134164	0.000572375	0.000297206	0.000847545	680	38517452	0.00176543	417	28642163	0.0014559	437	26103837	0.00167408	425	27161364	0.00156472	298	22945505	0.00129873	433	22183832	0.00195187	301	26358245	0.00114196	307	28730741	0.00106854	209	26223346	0.000797	239	26962296	0.000886423	164	21374961	0.000767253	183	20608942	0.000887964	174	20367957	0.000854283	166
K01644 citrate lyase subunit beta / citryl-CoA lyase [EC:4.1.3.34]	0.0167672	0.00178878	0.0130489	0.0014043	0.000788243	0.0134239	0.00371824	0.0018649	0.00557159	5670	38517452	0.0147206	4159	28642163	0.0145206	4320	26103837	0.0165493	4888	27161364	0.0179962	4624	22945505	0.0201521	4041	22183832	0.018216	4176	26358245	0.0158432	4637	28730741	0.0161395	3009	26223346	0.0114745	3378	26962296	0.0125286	2719	21374961	0.0127205	2511	20608942	0.012184	2497	20367957	0.0122595	2239
K01524 exopolyphosphatase / guanosine-5'-triphosphate,3'-diphosphate pyrophosphatase [EC:3.6.1.11 3.6.1.40]	0.0293346	0.00591359	0.0174143	0.00192366	0.000809839	0.0134271	0.0119203	0.00655165	0.017289	11052	38517452	0.0286935	7964	28642163	0.0278052	10237	26103837	0.0392165	9422	27161364	0.034689	7425	22945505	0.0323593	6581	22183832	0.0296657	5089	26358245	0.0193071	6591	28730741	0.0229406	3993	26223346	0.0152269	4181	26962296	0.0155068	3615	21374961	0.0169123	3259	20608942	0.0158135	3982	20367957	0.0195503	2981
K02518 translation initiation factor IF-1	0.0166585	0.000600371	0.0182227	0.000751639	0.000811081	0.013428	-0.00156423	-0.00234766	-0.000780813	6626	38517452	0.0172026	4841	28642163	0.0169017	4042	26103837	0.0154843	4404	27161364	0.0162142	3932	22945505	0.0171363	3777	22183832	0.0170259	4246	26358245	0.0161088	4940	28730741	0.0171941	4638	26223346	0.0176865	5132	26962296	0.019034	4221	21374961	0.0197474	3776	20608942	0.0183221	3531	20367957	0.0173361	3198
K06176 tRNA pseudouridine13 synthase [EC:5.4.99.27]	0.00734824	0.000970387	0.00542522	0.000475645	0.000792089	0.0134287	0.00192302	0.00101509	0.00283095	2958	38517452	0.00767964	2317	28642163	0.00808947	2239	26103837	0.00857728	1997	27161364	0.00735236	1492	22945505	0.00650236	1416	22183832	0.00638303	2225	26358245	0.00844138	1655	28730741	0.00576038	1345	26223346	0.00512902	1520	26962296	0.0056375	1085	21374961	0.00507603	1111	20608942	0.00539086	1088	20367957	0.00534172	835
K07063 uncharacterized protein	0.0251952	0.0031747	0.0186518	0.00242357	0.000797336	0.0134369	0.0065434	0.00328437	0.00980242	11585	38517452	0.0300773	7597	28642163	0.0265238	6778	26103837	0.0259655	7018	27161364	0.0258382	5999	22945505	0.0261446	5773	22183832	0.0260235	5937	26358245	0.0225243	5305	28730741	0.0184645	4261	26223346	0.0162489	4758	26962296	0.0176469	3467	21374961	0.0162199	3349	20608942	0.0162502	4660	20367957	0.0228791	3946
K01414 oligopeptidase A [EC:3.4.24.70]	0.00465498	0.00179305	0.000976576	0.000432475	0.000809768	0.0134457	0.0036784	0.00206402	0.00529279	1668	38517452	0.0043305	1154	28642163	0.00402903	1819	26103837	0.00696832	1715	27161364	0.00631412	1468	22945505	0.00639777	1142	22183832	0.00514789	558	26358245	0.00211698	556	28730741	0.00193521	76	26223346	0.000289818	125	26962296	0.00046361	145	21374961	0.000678364	211	20608942	0.00102383	283	20367957	0.00138944	195
K02437 glycine cleavage system H protein	0.0384692	0.00244389	0.0320063	0.00311823	0.000804025	0.0134493	0.00646297	0.00323402	0.00969192	15493	38517452	0.0402233	11167	28642163	0.038988	9594	26103837	0.0367532	10581	27161364	0.0389561	9181	22945505	0.0400122	9053	22183832	0.040809	10350	26358245	0.0392667	9408	28730741	0.0327454	7629	26223346	0.0290924	7854	26962296	0.0291296	6472	21374961	0.0302784	5665	20608942	0.0274881	7300	20367957	0.0358406	6371
K02427 23S rRNA (uridine2552-2'-O)-methyltransferase [EC:2.1.1.166]	0.00485135	0.000855865	0.00280114	0.000940085	0.000797191	0.0134545	0.00205021	0.00101876	0.00308166	1719	38517452	0.00446291	1066	28642163	0.00372179	1718	26103837	0.00658141	1457	27161364	0.00536424	1102	22945505	0.00480268	942	22183832	0.00424634	1102	26358245	0.00418085	1566	28730741	0.00545061	535	26223346	0.00204017	480	26962296	0.00178026	418	21374961	0.00195556	374	20608942	0.00181475	759	20367957	0.00372644	564
K01940 argininosuccinate synthase [EC:6.3.4.5]	0.0553943	0.00373802	0.0627847	0.00191849	0.000803356	0.013458	-0.00739041	-0.0109083	-0.00387249	20434	38517452	0.0530513	15604	28642163	0.0544791	13053	26103837	0.0500041	13645	27161364	0.0502368	13625	22945505	0.0593798	12918	22183832	0.0582316	15294	26358245	0.0580236	17166	28730741	0.0597478	16872	26223346	0.0643396	17382	26962296	0.0644678	13954	21374961	0.065282	13224	20608942	0.0641663	12164	20367957	0.0597213	11235
K01874 methionyl-tRNA synthetase [EC:6.1.1.10]	0.0902248	0.00358126	0.0973322	0.00214383	0.000809395	0.0134593	-0.00710741	-0.0105632	-0.00365161	35217	38517452	0.0914313	26651	28642163	0.0930481	23102	26103837	0.0885004	23770	27161364	0.087514	20096	22945505	0.0875814	19068	22183832	0.0859545	23711	26358245	0.0899567	28102	28730741	0.0978116	25190	26223346	0.0960594	25768	26962296	0.0955705	21040	21374961	0.0984329	20559	20608942	0.0997577	19403	20367957	0.0952624	18306
K17235 arabinosaccharide transport system permease protein	0.000514194	0.000182282	0.00122998	0.000362248	0.000807146	0.0134616	-0.000715789	-0.00105583	-0.000375753	138	38517452	0.000358279	85	28642163	0.000296765	140	26103837	0.00053632	160	27161364	0.000589072	74	22945505	0.000322503	102	22183832	0.000459794	184	26358245	0.000698074	245	28730741	0.000852745	374	26223346	0.00142621	450	26962296	0.001669	314	21374961	0.00146901	304	20608942	0.00147509	148	20367957	0.000726632	103
K05808 putative sigma-54 modulation protein	0.0227086	0.00144668	0.0257174	0.0011513	0.000808484	0.013464	-0.0030088	-0.00451472	-0.00150288	9347	38517452	0.0242669	6804	28642163	0.0237552	5461	26103837	0.0209203	5499	27161364	0.0202457	5350	22945505	0.0233161	5152	22183832	0.0232241	5722	26358245	0.0217086	6962	28730741	0.0242319	6489	26223346	0.0247451	6874	26962296	0.0254949	5404	21374961	0.0252819	5508	20608942	0.0267263	5637	20367957	0.0276758	4854
K03520 aerobic carbon-monoxide dehydrogenase large subunit [EC:1.2.5.3]	0.0176264	0.00404367	0.00962383	0.00222568	0.000802702	0.013467	0.0080026	0.00415785	0.0118474	7884	38517452	0.0204686	5809	28642163	0.0202813	6073	26103837	0.0232648	5933	27161364	0.0218435	3544	22945505	0.0154453	3264	22183832	0.0147134	3201	26358245	0.0121442	3692	28730741	0.0128503	2085	26223346	0.00795093	2147	26962296	0.00796297	1369	21374961	0.00640469	1665	20608942	0.00807902	2193	20367957	0.0107669	1872
K08740 DNA mismatch repair protein MSH4	0.000510011	0.000422414	0.00269619	0.00109343	0.000796904	0.0134698	-0.00218617	-0.00318768	-0.00118467	13	38517452	3.37509e-05	0	28642163	0	32	26103837	0.000122587	70	27161364	0.000257719	170	22945505	0.000740886	188	22183832	0.000847464	277	26358245	0.0010509	295	28730741	0.00102677	803	26223346	0.00306216	735	26962296	0.00272603	1002	21374961	0.00468773	558	20608942	0.00270756	631	20367957	0.003098	559
K08086 pilus assembly protein FimV	0.00488603	0.00207866	0.000675686	0.000615904	0.000815038	0.0134738	0.00421034	0.00232951	0.00609117	1503	38517452	0.00390213	1058	28642163	0.00369386	2081	26103837	0.00797201	1899	27161364	0.00699155	1566	22945505	0.00682487	1169	22183832	0.0052696	633	26358245	0.00240153	584	28730741	0.00203267	17	26223346	6.48277e-05	13	26962296	4.82155e-05	14	21374961	6.54972e-05	23	20608942	0.000111602	282	20367957	0.00138453	255
K00122 formate dehydrogenase [EC:1.17.1.9]	0.025421	0.0044916	0.013341	0.00585915	0.000801914	0.0134738	0.0120799	0.00605705	0.0181028	6932	38517452	0.017997	5049	28642163	0.0176279	7246	26103837	0.0277584	7408	27161364	0.027274	6409	22945505	0.0279314	6179	22183832	0.0278536	7956	26358245	0.0301841	7683	28730741	0.0267414	2752	26223346	0.0104945	2582	26962296	0.00957634	1699	21374961	0.00794855	1751	20608942	0.00849631	2342	20367957	0.0114985	2215
K19746 D-arginine dehydrogenase [EC:1.4.99.6]	0.00139482	0.000556478	0.000223548	6.81109e-05	0.000796025	0.0134751	0.00117128	0.000673155	0.0016694	490	38517452	0.00127215	386	28642163	0.00134766	566	26103837	0.00216826	526	27161364	0.00193657	414	22945505	0.00180427	334	22183832	0.0015056	155	26358245	0.000588051	154	28730741	0.000536011	58	26223346	0.000221177	49	26962296	0.000181735	43	21374961	0.00020117	42	20608942	0.000203795	46	20367957	0.000225845	28
K01870 isoleucyl-tRNA synthetase [EC:6.1.1.5]	0.145451	0.00703064	0.159687	0.0021475	0.000807135	0.0134813	-0.0142354	-0.0206032	-0.00786749	56266	38517452	0.146079	43161	28642163	0.15069	36084	26103837	0.138233	37771	27161364	0.139061	32819	22945505	0.14303	31040	22183832	0.139922	38407	26358245	0.145712	46223	28730741	0.160883	41063	26223346	0.156589	43803	26962296	0.16246	34707	21374961	0.162372	33157	20608942	0.160886	31921	20367957	0.156722	28843
K08984 putative membrane protein	0.00396628	0.00115267	0.00168162	0.000659265	0.000801731	0.0134908	0.00228465	0.00118165	0.00338766	1124	38517452	0.00291816	891	28642163	0.0031108	1582	26103837	0.00606041	1378	27161364	0.00507338	1059	22945505	0.00461528	958	22183832	0.00431846	740	26358245	0.00280747	812	28730741	0.00282624	247	26223346	0.000941909	235	26962296	0.000871587	301	21374961	0.00140819	271	20608942	0.00131496	588	20367957	0.00288689	435
K01772 protoporphyrin/coproporphyrin ferrochelatase [EC:4.99.1.1 4.99.1.9]	0.0130972	0.00290351	0.00734234	0.00122755	0.000818903	0.0135179	0.00575485	0.00307797	0.00843174	4442	38517452	0.0115324	3248	28642163	0.0113399	3954	26103837	0.0151472	3515	27161364	0.0129412	4174	22945505	0.0181909	3580	22183832	0.0161379	2567	26358245	0.00973889	2801	28730741	0.00974914	1504	26223346	0.00573535	1622	26962296	0.00601581	1501	21374961	0.00702224	1342	20608942	0.00651174	1700	20367957	0.00834644	1266
K02168 choline/glycine/proline betaine transport protein	0.000300988	9.16369e-05	7.60146e-05	0.000105372	0.000821818	0.0135462	0.000224973	0.000111566	0.000338381	140	38517452	0.000363472	76	28642163	0.000265343	98	26103837	0.000375424	33	27161364	0.000121496	73	22945505	0.000318145	84	22183832	0.000378654	102	26358245	0.000386976	57	28730741	0.000198394	0	26223346	0	2	26962296	7.41777e-06	0	21374961	0	4	20608942	1.94091e-05	64	20367957	0.000314219	26
K04780 nonribosomal peptide synthetase DhbF	0.00984141	0.00306768	0.00379525	0.00164771	0.000824281	0.013567	0.00604615	0.00314037	0.00895193	3072	38517452	0.00797561	1714	28642163	0.00598418	2738	26103837	0.0104889	3334	27161364	0.0122748	3425	22945505	0.0149267	2402	22183832	0.0108277	2930	26358245	0.0111161	1476	28730741	0.00513735	712	26223346	0.00271514	491	26962296	0.00182106	601	21374961	0.0028117	594	20608942	0.00288224	974	20367957	0.00478202	589
K02879 large subunit ribosomal protein L17	0.0264878	0.000841993	0.028337	0.000788713	0.000830401	0.013628	-0.00184916	-0.00278478	-0.000913534	9879	38517452	0.0256481	7671	28642163	0.0267822	6869	26103837	0.0263141	7295	27161364	0.026858	6315	22945505	0.0275217	5689	22183832	0.0256448	6684	26358245	0.0253583	7980	28730741	0.0277751	7333	26223346	0.0279636	7598	26962296	0.0281801	6263	21374961	0.0293006	5943	20608942	0.028837	5539	20367957	0.0271947	4975
K01890 phenylalanyl-tRNA synthetase beta chain [EC:6.1.1.20]	0.108629	0.00546363	0.119645	0.00166954	0.000829471	0.0136325	-0.0110158	-0.0159644	-0.00606713	41474	38517452	0.107676	31140	28642163	0.108721	26582	26103837	0.101832	27784	27161364	0.102292	24941	22945505	0.108697	24302	22183832	0.109548	28833	26358245	0.109389	34730	28730741	0.120881	30886	26223346	0.117781	32293	26962296	0.119771	25669	21374961	0.120089	24540	20608942	0.119075	24641	20367957	0.120979	22219
K09711 uncharacterized protein	0.00433617	0.000687376	0.00252105	0.000880756	0.000834339	0.0136332	0.00181512	0.000904387	0.00272585	1707	38517452	0.00443176	1226	28642163	0.0042804	1090	26103837	0.00417563	1185	27161364	0.00436281	1238	22945505	0.00539539	1161	22183832	0.00523354	950	26358245	0.00360419	921	28730741	0.00320563	395	26223346	0.00150629	534	26962296	0.00198054	357	21374961	0.00167018	302	20608942	0.00146538	664	20367957	0.00326002	594
K07000 uncharacterized protein	0.0017768	0.000568921	0.000645797	0.000215887	0.000834177	0.0136503	0.001131	0.000610501	0.00165151	402	38517452	0.00104368	377	28642163	0.00131624	733	26103837	0.00280802	627	27161364	0.00230843	465	22945505	0.00202654	401	22183832	0.00180762	470	26358245	0.00178312	322	28730741	0.00112075	81	26223346	0.000308885	117	26962296	0.000433939	100	21374961	0.000467837	136	20608942	0.000659908	172	20367957	0.000844464	115
K16559 endo-1,3-1,4-beta-glycanase ExoK [EC:3.2.1.-]	9.66205e-05	8.9517e-05	0.000970599	0.000425285	0.000834066	0.0136683	-0.000873979	-0.0012561	-0.000491861	42	38517452	0.000109041	53	28642163	0.000185042	16	26103837	6.12937e-05	11	27161364	4.04987e-05	0	22945505	0	0	22183832	0	26	26358245	9.86409e-05	80	28730741	0.000278447	297	26223346	0.00113258	276	26962296	0.00102365	263	21374961	0.00123041	223	20608942	0.00108205	279	20367957	0.0013698	252
K01868 threonyl-tRNA synthetase [EC:6.1.1.3]	0.0911305	0.0023954	0.100859	0.00144435	1.21104e-06	0.0136739	-0.00972847	-0.0120432	-0.00741372	35824	38517452	0.0930072	26755	28642163	0.0934112	23101	26103837	0.0884966	24373	27161364	0.0897341	20570	22945505	0.0896472	19609	22183832	0.0883932	23964	26358245	0.0909165	27420	28730741	0.0954378	26032	26223346	0.0992703	26970	26962296	0.100029	22086	21374961	0.103327	20740	20608942	0.100636	20390	20367957	0.100108	18478
K00304 sarcosine oxidase, subunit delta [EC:1.5.3.1]	0.000489674	0.000186297	0.000124509	9.57353e-05	0.000855454	0.013838	0.000365166	0.000189808	0.000540523	217	38517452	0.000563381	178	28642163	0.000621461	213	26103837	0.000815972	173	27161364	0.000636934	85	22945505	0.000370443	82	22183832	0.000369639	78	26358245	0.000295923	70	28730741	0.000243641	18	26223346	6.86411e-05	21	26962296	7.78865e-05	14	21374961	6.54972e-05	25	20608942	0.000121307	15	20367957	7.36451e-05	9
K14457 2-acylglycerol O-acyltransferase 2 [EC:2.3.1.22]	0.000752714	0.000308125	0.0001466	0.000136922	0.000850782	0.0138418	0.000606114	0.0003208	0.000891427	167	38517452	0.00043357	106	28642163	0.000370084	179	26103837	0.000685723	179	27161364	0.000659024	321	22945505	0.00139897	212	22183832	0.000955651	237	26358245	0.000899149	178	28730741	0.000619545	6	26223346	2.28804e-05	0	26962296	0	0	21374961	0	14	20608942	6.79317e-05	39	20367957	0.000191477	68
K20074 PPM family protein phosphatase [EC:3.1.3.16]	0.0353429	0.00383532	0.0275781	0.00101692	0.000852203	0.0138449	0.0077648	0.00430492	0.0112247	15400	38517452	0.0399819	10510	28642163	0.0366942	9853	26103837	0.0377454	9988	27161364	0.0367728	8506	22945505	0.0370704	7551	22183832	0.0340383	8975	26358245	0.0340501	7582	28730741	0.0263899	7605	26223346	0.0290009	7743	26962296	0.0287179	5882	21374961	0.0275182	5348	20608942	0.0259499	5731	20367957	0.0281373	4725
K13617 protein phosphatase methylesterase 1 [EC:3.1.1.89]	0.00110887	0.000463564	0.000199133	0.000226	0.0008502	0.0138523	0.000909733	0.000476281	0.00134318	584	38517452	0.0015162	227	28642163	0.000792538	409	26103837	0.00156682	258	27161364	0.000949879	429	22945505	0.00186965	214	22183832	0.000964667	222	26358245	0.000842241	106	28730741	0.000368943	0	26223346	0	13	26962296	4.82155e-05	0	21374961	0	22	20608942	0.00010675	122	20367957	0.00059898	51
K06023 HPr kinase/phosphorylase [EC:2.7.11.- 2.7.4.-]	0.0140954	0.00181992	0.0105273	0.000895106	0.000855371	0.0138565	0.00356811	0.00186462	0.0052716	6120	38517452	0.0158889	4450	28642163	0.0155365	4365	26103837	0.0167217	4090	27161364	0.0150582	3030	22945505	0.0132052	2852	22183832	0.0128562	3063	26358245	0.0116207	3412	28730741	0.0118758	2746	26223346	0.0104716	2615	26962296	0.00969873	1978	21374961	0.00925382	1981	20608942	0.00961233	2285	20367957	0.0112186	1907
K07789 multidrug efflux pump	0.0017038	0.000412178	0.000840348	0.000343084	0.000849871	0.0138669	0.000863452	0.000427367	0.00129954	821	38517452	0.0021315	541	28642163	0.00188882	445	26103837	0.00170473	460	27161364	0.00169358	537	22945505	0.00234033	367	22183832	0.00165436	322	26358245	0.00122163	286	28730741	0.000995449	221	26223346	0.00084276	168	26962296	0.000623092	148	21374961	0.000692399	156	20608942	0.000756953	115	20367957	0.000564612	80
K16928 energy-coupling factor transport system substrate-specific component	0.00182478	0.000268946	0.00128474	0.000189736	0.000861098	0.0138697	0.000540046	0.000270386	0.000809706	705	38517452	0.00183034	590	28642163	0.0020599	467	26103837	0.00178901	457	27161364	0.00168254	397	22945505	0.00173019	515	22183832	0.00232151	489	26358245	0.00185521	382	28730741	0.00132959	316	26223346	0.00120503	323	26962296	0.00119797	275	21374961	0.00128655	270	20608942	0.00131011	242	20367957	0.00118814	308
K07080 uncharacterized protein	0.0399668	0.00408351	0.0302154	0.00453418	0.000862609	0.0138742	0.00975141	0.00479979	0.014703	14772	38517452	0.0383514	11182	28642163	0.0390403	9504	26103837	0.0364084	9457	27161364	0.0348178	10104	22945505	0.0440348	10761	22183832	0.0485083	10462	26358245	0.0396916	11171	28730741	0.0388817	6597	26223346	0.025157	6742	26962296	0.0250053	5678	21374961	0.0265638	5411	20608942	0.0262556	6887	20367957	0.0338129	6121
K00349 Na+-transporting NADH	0.00342447	0.000680789	0.00203339	0.000148672	0.000855354	0.0138762	0.00139107	0.000779087	0.00200306	1270	38517452	0.00329721	1005	28642163	0.00350881	1166	26103837	0.00446678	1098	27161364	0.00404251	849	22945505	0.00370007	784	22183832	0.00353411	704	26358245	0.00267089	625	28730741	0.00217537	558	26223346	0.00212787	487	26962296	0.00180623	408	21374961	0.00190878	409	20608942	0.00198458	463	20367957	0.00227318	391
K03981 thiol	0.00481832	0.00121881	0.00241675	0.00073892	0.000860758	0.013884	0.00240157	0.00122253	0.00358062	2417	38517452	0.00627508	1568	28642163	0.00547445	1419	26103837	0.00543598	1320	27161364	0.00485984	1296	22945505	0.00564817	1150	22183832	0.00518396	653	26358245	0.0024774	917	28730741	0.0031917	446	26223346	0.00170077	568	26962296	0.00210665	390	21374961	0.00182456	423	20608942	0.00205251	768	20367957	0.00377063	638
K07050 misacylated tRNA(Ala) deacylase [EC:3.1.1.-]	0.006705	0.000989469	0.00450664	0.000961655	0.000865852	0.0138868	0.00219835	0.00107973	0.00331697	3112	38517452	0.00807945	1844	28642163	0.00643806	2135	26103837	0.00817887	1840	27161364	0.00677433	1528	22945505	0.00665926	1423	22183832	0.00641458	1642	26358245	0.00622955	1398	28730741	0.00486587	1054	26223346	0.00401932	1050	26962296	0.00389433	698	21374961	0.0032655	665	20608942	0.00322675	1154	20367957	0.00566576	1034
K10763 DnaA-homolog protein	0.00196534	0.000626839	0.000720499	0.000224159	0.000859889	0.0138899	0.00124485	0.000673279	0.00181641	845	38517452	0.00219381	782	28642163	0.00273024	728	26103837	0.00278886	639	27161364	0.00235261	414	22945505	0.00180427	297	22183832	0.00133881	237	26358245	0.000899149	464	28730741	0.00161499	204	26223346	0.000777933	110	26962296	0.000407977	94	21374961	0.000439767	125	20608942	0.000606533	200	20367957	0.000981935	188
K17222 L-cysteine S-thiosulfotransferase [EC:2.8.5.2]	0.00135242	0.000545657	0.00026669	0.000185979	0.000865325	0.0138981	0.00108573	0.00058936	0.00158211	551	38517452	0.00143052	346	28642163	0.00120801	520	26103837	0.00199204	589	27161364	0.00216852	350	22945505	0.00152535	301	22183832	0.00135684	122	26358245	0.000462853	194	28730741	0.000675235	40	26223346	0.000152536	31	26962296	0.000114975	23	21374961	0.000107603	19	20608942	9.2193e-05	54	20367957	0.000265122	53
K01591 orotidine-5'-phosphate decarboxylase [EC:4.1.1.23]	0.0355871	0.00261055	0.0406945	0.00138686	0.000868991	0.0139174	-0.00510746	-0.00757621	-0.0026387	12398	38517452	0.032188	9788	28642163	0.0341734	8973	26103837	0.0343743	9366	27161364	0.0344828	8158	22945505	0.0355538	7979	22183832	0.0359676	9549	26358245	0.0362278	11989	28730741	0.0417288	10459	26223346	0.0398843	10809	26962296	0.0400893	9101	21374961	0.0425779	8847	20608942	0.042928	8064	20367957	0.0395916	7533
K00962 polyribonucleotide nucleotidyltransferase [EC:2.7.7.8]	0.105187	0.00562131	0.11638	0.00182315	0.00087873	0.013935	-0.0111926	-0.0162953	-0.00608994	41208	38517452	0.106985	31048	28642163	0.1084	25096	26103837	0.0961391	27641	27161364	0.101766	24151	22945505	0.105254	22588	22183832	0.101822	27513	26358245	0.104381	33543	28730741	0.11675	30580	26223346	0.116614	30945	26962296	0.114771	24622	21374961	0.115191	24098	20608942	0.11693	23145	20367957	0.113634	21682
K19175 DNA phosphorothioation-dependent restriction protein DptH	0.00181661	0.00153241	0.00830056	0.00331181	0.000871526	0.0139382	-0.00648395	-0.00956278	-0.00340512	77	38517452	0.000199909	28	28642163	9.7758e-05	109	26103837	0.000417563	138	27161364	0.000508075	806	22945505	0.00351267	830	22183832	0.00374146	764	26358245	0.00289852	907	28730741	0.0031569	2436	26223346	0.00928943	2425	26962296	0.00899404	2994	21374961	0.014007	1749	20608942	0.00848661	1961	20367957	0.00962787	1705
K07119 uncharacterized protein	0.00530842	0.00107764	0.00281656	0.00113622	0.000878423	0.0139498	0.00249187	0.00122206	0.00376167	1822	38517452	0.00473032	1178	28642163	0.00411282	1938	26103837	0.0074242	1594	27161364	0.00586863	1467	22945505	0.00639341	1114	22183832	0.00502168	1208	26358245	0.00458301	1245	28730741	0.00433334	503	26223346	0.00191814	614	26962296	0.00227725	449	21374961	0.00210059	615	20608942	0.00298414	413	20367957	0.00202769	334
K16885 quinone-modifying oxidoreductase, subunit QmoA	0.00276953	0.000689955	0.00141494	0.000411412	0.000876649	0.0139609	0.00135458	0.000689301	0.00201987	877	38517452	0.00227689	583	28642163	0.00203546	667	26103837	0.00255518	768	27161364	0.00282755	806	22945505	0.00351267	917	22183832	0.00413364	737	26358245	0.00279609	580	28730741	0.00201874	220	26223346	0.000838947	224	26962296	0.00083079	299	21374961	0.00139883	348	20608942	0.00168859	427	20367957	0.00209643	297
K19870 sperm-associated antigen 1	0.000181688	0.000215595	0.000895861	0.000363799	0.00087458	0.0139673	-0.000714173	-0.00106455	-0.000363795	22	38517452	5.7117e-05	7	28642163	2.44395e-05	0	26103837	0	82	27161364	0.000301899	0	22945505	0	8	22183832	3.60623e-05	123	26358245	0.000466647	163	28730741	0.000567337	256	26223346	0.000976229	373	26962296	0.00138341	281	21374961	0.00131462	230	20608942	0.00111602	64	20367957	0.000314219	78
K09013 Fe-S cluster assembly ATP-binding protein	0.0203924	0.00153785	0.0233967	0.000750175	0.000878372	0.0139686	-0.00300426	-0.00444231	-0.00156621	7611	38517452	0.0197599	5611	28642163	0.01959	5340	26103837	0.0204568	5343	27161364	0.0196713	4542	22945505	0.0197947	4213	22183832	0.0189913	5433	26358245	0.0206121	6971	28730741	0.0242632	6080	26223346	0.0231854	6292	26962296	0.0233363	5214	21374961	0.024393	4818	20608942	0.0233782	4421	20367957	0.0217057	4293
K02366 glucuronyl/N-acetylglucosaminyl transferase EXT1 [EC:2.4.1.224 2.4.1.225]	0.00253364	0.000846834	0.00086773	0.00034162	0.000875917	0.0139689	0.00166591	0.00088798	0.00244383	532	38517452	0.00138119	402	28642163	0.00140353	922	26103837	0.00353205	1066	27161364	0.00392469	581	22945505	0.00253209	592	22183832	0.00266861	709	26358245	0.00268986	614	28730741	0.00213708	164	26223346	0.000625397	198	26962296	0.000734359	149	21374961	0.000697077	94	20608942	0.000456113	197	20367957	0.000967205	117
K20976 histidine phosphotransfer protein HptB	0.000637251	0.000159375	0.000245014	0.000186551	0.000884688	0.0140098	0.000392238	0.000192879	0.000591596	284	38517452	0.000737328	225	28642163	0.000785555	211	26103837	0.00080831	188	27161364	0.00069216	105	22945505	0.000457606	164	22183832	0.000739277	91	26358245	0.000345243	153	28730741	0.000532531	44	26223346	0.000167789	89	26962296	0.000330091	64	21374961	0.000299416	13	20608942	6.30794e-05	137	20367957	0.000672625	43
K07300 Ca2+	0.0156713	0.00165519	0.0119619	0.0016478	0.000886917	0.0140255	0.00370948	0.00181613	0.00560282	6600	38517452	0.0171351	4895	28642163	0.0170902	4423	26103837	0.0169439	4037	27161364	0.014863	4020	22945505	0.0175198	3326	22183832	0.0149929	3314	26358245	0.0125729	4095	28730741	0.014253	2904	26223346	0.0110741	2982	26962296	0.0110599	2274	21374961	0.0106386	2413	20608942	0.0117085	2263	20367957	0.0111106	1915
K02283 pilus assembly protein CpaF	0.0405642	0.00331379	0.0330725	0.0033741	0.000906531	0.0141572	0.0074917	0.00365781	0.0113256	16370	38517452	0.0425002	11670	28642163	0.0407441	11275	26103837	0.0431929	11882	27161364	0.043746	9558	22945505	0.0416552	8960	22183832	0.0403898	10490	26358245	0.0397978	9334	28730741	0.0324878	9418	26223346	0.0359146	9198	26962296	0.0341143	5738	21374961	0.0268445	5812	20608942	0.0282014	7036	20367957	0.0345445	6525
K21084 diguanylate cyclase [EC:2.7.7.65]	0.00715616	0.00115065	0.00486642	0.000799953	0.000906071	0.0141696	0.00228974	0.00114062	0.00343885	2975	38517452	0.00772377	1768	28642163	0.00617272	2273	26103837	0.00870753	2343	27161364	0.00862622	1610	22945505	0.00701662	1670	22183832	0.00752801	1374	26358245	0.00521279	1799	28730741	0.00626159	1326	26223346	0.00505656	1486	26962296	0.0055114	1069	21374961	0.00500118	809	20608942	0.00392548	1257	20367957	0.00617146	916
K02474 UDP-N-acetyl-D-galactosamine dehydrogenase [EC:1.1.1.-]	0.00705689	0.00100888	0.00499413	0.000795712	0.000909233	0.0141798	0.00206276	0.00101581	0.0031097	2418	38517452	0.00627767	1854	28642163	0.00647297	2021	26103837	0.00774216	2188	27161364	0.00805556	1889	22945505	0.00823255	1665	22183832	0.00750547	1324	26358245	0.0050231	2053	28730741	0.00714566	1381	26223346	0.0052663	1231	26962296	0.00456563	962	21374961	0.00450059	1053	20608942	0.00510943	793	20367957	0.00389337	774
K14591 protein AroM	0.00105898	0.000546523	0.00216056	0.000405825	0.000905644	0.0141826	-0.00110158	-0.00165777	-0.000545388	341	38517452	0.000885313	209	28642163	0.000729693	144	26103837	0.000551643	149	27161364	0.000548573	189	22945505	0.000823691	221	22183832	0.000996221	545	26358245	0.00206766	537	28730741	0.00186908	661	26223346	0.00252065	691	26962296	0.00256284	520	21374961	0.00243275	539	20608942	0.00261537	304	20367957	0.00149254	304
K05561 multicomponent K+	0.00179976	0.000761897	0.000300823	0.000280196	0.000905451	0.0141992	0.00149893	0.000803162	0.00219471	610	38517452	0.0015837	313	28642163	0.00109279	760	26103837	0.00291145	692	27161364	0.00254774	609	22945505	0.00265411	394	22183832	0.00177607	260	26358245	0.000986409	243	28730741	0.000845784	37	26223346	0.000141096	17	26962296	6.3051e-05	15	21374961	7.01756e-05	36	20608942	0.000174681	47	20367957	0.000230755	31
K17231 iodotyrosine deiodinase [EC:1.21.1.1]	0.00420402	0.000523274	0.00529033	0.000433046	0.000900898	0.0142068	-0.00108631	-0.00163874	-0.000533881	1426	38517452	0.00370222	1052	28642163	0.00367291	969	26103837	0.0037121	1015	27161364	0.00373693	1122	22945505	0.00488985	1080	22183832	0.00486841	1245	26358245	0.00472338	1243	28730741	0.00432638	1518	26223346	0.00578873	1542	26962296	0.0057191	1163	21374961	0.00544095	974	20608942	0.0047261	1043	20367957	0.00512079	1053
K08974 putative membrane protein	0.000723312	0.00038397	0.00179747	0.000536862	0.000903489	0.0142079	-0.00107416	-0.00161451	-0.000533801	100	38517452	0.000259623	32	28642163	0.000111723	240	26103837	0.000919405	266	27161364	0.000979332	253	22945505	0.00110261	225	22183832	0.00101425	90	26358245	0.000341449	304	28730741	0.0010581	478	26223346	0.0018228	540	26962296	0.0020028	652	21374961	0.0030503	391	20608942	0.00189723	320	20367957	0.0015711	260
K14287 methionine transaminase [EC:2.6.1.88]	0.00213725	0.000907732	0.000298288	0.000195763	0.000904841	0.0142094	0.00183896	0.00102311	0.00265482	1039	38517452	0.00269748	810	28642163	0.002828	835	26103837	0.00319876	729	27161364	0.00268396	572	22945505	0.00249286	394	22183832	0.00177607	147	26358245	0.0005577	248	28730741	0.000863187	15	26223346	5.72009e-05	27	26962296	0.00010014	35	21374961	0.000163743	30	20608942	0.000145568	87	20367957	0.000427142	116
K09131 uncharacterized protein	0.0144492	0.000790987	0.0162336	0.000803485	0.0009137	0.0142102	-0.00178433	-0.00269836	-0.000870301	5334	38517452	0.0138483	3712	28642163	0.0129599	3657	26103837	0.0140094	3961	27161364	0.0145832	3417	22945505	0.0148918	3266	22183832	0.0147224	3894	26358245	0.0147734	4541	28730741	0.0158054	3878	26223346	0.0147883	4219	26962296	0.0156478	3720	21374961	0.0174035	3310	20608942	0.016061	3186	20367957	0.0156422	2981
K03808 paraquat-inducible protein A	0.00291392	0.000936407	0.000902183	0.000855675	0.000912525	0.0142115	0.00201174	0.000982665	0.00304082	665	38517452	0.00172649	360	28642163	0.00125689	1084	26103837	0.00415265	1068	27161364	0.00393206	756	22945505	0.00329476	597	22183832	0.00269115	831	26358245	0.00315271	892	28730741	0.00310469	82	26223346	0.000312698	106	26962296	0.000393142	89	21374961	0.000416375	111	20608942	0.000538601	110	20367957	0.000540064	57
K14267 N-succinyldiaminopimelate aminotransferase [EC:2.6.1.17]	0.010255	0.00187003	0.00661673	0.000965351	0.000903173	0.0142228	0.00363826	0.00187696	0.00539957	3135	38517452	0.00813917	2096	28642163	0.00731788	3306	26103837	0.0126648	3332	27161364	0.0122674	2823	22945505	0.0123031	2239	22183832	0.0100929	2522	26358245	0.00956816	2783	28730741	0.00968649	1539	26223346	0.00586882	1687	26962296	0.00625689	1305	21374961	0.00610527	1112	20608942	0.00539572	1444	20367957	0.00708957	1088
K15513 benzoyl-CoA-dihydrodiol lyase [EC:4.1.2.44]	0.00207679	0.000855618	0.000394793	0.000323518	0.000900809	0.0142252	0.00168199	0.000899365	0.00246462	758	38517452	0.00196794	325	28642163	0.00113469	918	26103837	0.00351672	936	27161364	0.00344607	454	22945505	0.0019786	388	22183832	0.00174902	384	26358245	0.00145685	392	28730741	0.00136439	39	26223346	0.000148722	42	26962296	0.000155773	31	21374961	0.00014503	27	20608942	0.000131011	103	20367957	0.000505696	44
K18900 LysR family transcriptional regulator, regulator for bpeEF and oprC	0.00486934	0.00179414	0.00138651	0.000852616	0.000921618	0.0142939	0.00348282	0.00181013	0.00515552	1696	38517452	0.0044032	1083	28642163	0.00378114	2159	26103837	0.00827081	1883	27161364	0.00693264	1253	22945505	0.00546076	960	22183832	0.00432748	725	26358245	0.00275056	870	28730741	0.00302812	317	26223346	0.00120885	308	26962296	0.00114234	166	21374961	0.00077661	128	20608942	0.00062109	214	20367957	0.00105067	120
K07494 putative transposase	0.118454	0.00793915	0.0994946	0.00893169	0.000920473	0.0142958	0.0189591	0.00925922	0.028659	44582	38517452	0.115745	36968	28642163	0.129068	28864	26103837	0.110574	31196	27161364	0.114854	28807	22945505	0.125545	27186	22183832	0.122549	32940	26358245	0.12497	29973	28730741	0.104324	22860	26223346	0.0871742	22711	26962296	0.0842324	20864	21374961	0.0976095	20786	20608942	0.100859	20818	20367957	0.10221	18733
K07395 putative proteasome-type protease	0.00368955	0.000982587	0.00153934	0.000940125	0.000923528	0.0143039	0.00215021	0.00104761	0.00325281	1110	38517452	0.00288181	769	28642163	0.00268485	1334	26103837	0.00511036	1202	27161364	0.0044254	1143	22945505	0.00498137	819	22183832	0.00369188	626	26358245	0.00237497	967	28730741	0.00336573	268	26223346	0.00102199	251	26962296	0.00093093	205	21374961	0.000959066	208	20608942	0.00100927	212	20367957	0.00104085	186
K00130 betaine-aldehyde dehydrogenase [EC:1.2.1.8]	0.0153316	0.00414027	0.00728072	0.00179017	0.000928574	0.0143624	0.00805087	0.00422653	0.0118752	4703	38517452	0.01221	3141	28642163	0.0109664	4163	26103837	0.0159478	4341	27161364	0.0159823	5272	22945505	0.0229762	4472	22183832	0.0201588	3683	26358245	0.0139729	2999	28730741	0.0104383	1607	26223346	0.00612813	1472	26962296	0.00545948	1034	21374961	0.00483744	1216	20608942	0.00590035	1902	20367957	0.0093382	1425
K07088 uncharacterized protein	0.0164155	0.00330243	0.00923206	0.00312364	0.000929894	0.0143631	0.00718344	0.0034974	0.0108695	7914	38517452	0.0205465	5460	28642163	0.0190628	4953	26103837	0.0189742	4852	27161364	0.0178636	3831	22945505	0.0166961	3480	22183832	0.0156871	3095	26358245	0.0117421	3089	28730741	0.0107516	1746	26223346	0.00665819	1544	26962296	0.00572652	1362	21374961	0.00637194	1399	20608942	0.00678832	2872	20367957	0.0141006	2433
K07152 protein SCO1/2	0.00875833	0.00203579	0.00481199	0.00110621	0.00093304	0.014392	0.00394634	0.00201458	0.00587809	3984	38517452	0.0103434	2774	28642163	0.00968502	3140	26103837	0.0120289	2898	27161364	0.0106696	1692	22945505	0.00737399	1396	22183832	0.00629287	1759	26358245	0.00667343	2011	28730741	0.00699947	1429	26223346	0.00544934	1432	26962296	0.00531112	968	21374961	0.00452866	1035	20608942	0.00502209	707	20367957	0.00347114	539
K00034 glucose 1-dehydrogenase [EC:1.1.1.47]	0.0156802	0.00181807	0.0121593	0.000986933	0.000939429	0.0144708	0.00352091	0.00179602	0.00524581	5725	38517452	0.0148634	4428	28642163	0.0154597	4872	26103837	0.0186639	4832	27161364	0.01779	3576	22945505	0.0155848	3021	22183832	0.013618	4351	26358245	0.0165072	3722	28730741	0.0129548	2921	26223346	0.0111389	3448	26962296	0.0127882	2470	21374961	0.0115556	2420	20608942	0.0117425	2646	20367957	0.012991	2557
K11997 tripartite motif-containing protein 2/3	0.014573	0.0020131	0.0103103	0.00179137	0.000942058	0.0144718	0.00426275	0.00207549	0.00645001	5439	38517452	0.0141209	3795	28642163	0.0132497	4177	26103837	0.0160015	4514	27161364	0.0166192	2884	22945505	0.0125689	3032	22183832	0.0136676	4806	26358245	0.0182334	3483	28730741	0.0121229	2780	26223346	0.0106012	2340	26962296	0.00867879	2023	21374961	0.00946434	1716	20608942	0.00832648	2127	20367957	0.0104429	1612
K00605 aminomethyltransferase [EC:2.1.2.10]	0.0517544	0.00393198	0.0434403	0.00348927	0.000944917	0.0144763	0.00831408	0.00404687	0.0125813	21226	38517452	0.0551075	15793	28642163	0.055139	14360	26103837	0.0550111	15516	27161364	0.0571253	11246	22945505	0.0490118	10653	22183832	0.0480215	12330	26358245	0.0467785	13745	28730741	0.0478407	10560	26223346	0.0402695	10839	26962296	0.0402006	8710	21374961	0.0407486	8025	20608942	0.0389394	9400	20367957	0.0461509	8321
K02338 DNA polymerase III subunit beta [EC:2.7.7.7]	0.0719731	0.00398623	0.0808581	0.00398314	0.000941212	0.0144785	-0.00888502	-0.0134532	-0.00431682	27804	38517452	0.0721855	21400	28642163	0.074715	17051	26103837	0.0653199	18254	27161364	0.0672058	16418	22945505	0.0715521	17239	22183832	0.0777097	18676	26358245	0.0708545	21905	28730741	0.0762424	21513	26223346	0.0820376	22449	26962296	0.0832607	18450	21374961	0.0863159	17344	20608942	0.0841576	16430	20367957	0.0806659	14663
K03216 tRNA (cytidine/uridine-2'-O-)-methyltransferase [EC:2.1.1.207]	0.00337059	0.00111142	0.00121555	0.000485687	0.000944439	0.0144887	0.00215504	0.00112747	0.0031826	971	38517452	0.00252094	759	28642163	0.00264994	1278	26103837	0.00489583	1192	27161364	0.00438859	1078	22945505	0.00469809	804	22183832	0.00362426	633	26358245	0.00240153	513	28730741	0.00178554	221	26223346	0.00084276	220	26962296	0.000815954	121	21374961	0.000566083	166	20608942	0.000805476	411	20367957	0.00201788	276
K08259 lysostaphin [EC:3.4.24.75]	0.00250672	0.000804848	0.000856301	0.000653864	0.000950171	0.0145371	0.00165042	0.000806468	0.00249436	913	38517452	0.00237035	613	28642163	0.0021402	990	26103837	0.00379255	886	27161364	0.00326199	659	22945505	0.00287202	592	22183832	0.00266861	522	26358245	0.0019804	278	28730741	0.000967605	145	26223346	0.000552942	198	26962296	0.000734359	183	21374961	0.000856142	19	20608942	9.2193e-05	143	20367957	0.000702083	441
K11161 retinol dehydrogenase 13 [EC:1.1.1.300]	0.00278087	0.00103286	0.000695714	0.0001937	0.000955873	0.0146045	0.00208516	0.00115831	0.00301201	1270	38517452	0.00329721	721	28642163	0.00251727	819	26103837	0.00313747	1175	27161364	0.004326	802	22945505	0.00349524	685	22183832	0.00308783	350	26358245	0.00132786	304	28730741	0.0010581	164	26223346	0.000625397	211	26962296	0.000782574	85	21374961	0.000397662	115	20608942	0.00055801	212	20367957	0.00104085	104
K07175 PhoH-like ATPase	0.0125053	0.00250921	0.00726169	0.00216973	0.000961824	0.0146361	0.0052436	0.00254923	0.00793797	5003	38517452	0.0129889	3722	28642163	0.0129948	3949	26103837	0.015128	3816	27161364	0.0140494	3486	22945505	0.0151925	2848	22183832	0.0128382	2236	26358245	0.00848311	2404	28730741	0.00836734	1940	26223346	0.00739799	1587	26962296	0.005886	1218	21374961	0.00569826	1221	20608942	0.00592461	2324	20367957	0.0114101	1867
K03786 3-dehydroquinate dehydratase II [EC:4.2.1.10]	0.0118684	0.000806731	0.0140502	0.00109162	0.00096003	0.0146482	-0.0021818	-0.00329111	-0.00107248	4859	38517452	0.0126151	3449	28642163	0.0120417	2651	26103837	0.0101556	3027	27161364	0.0111445	2843	22945505	0.0123902	2693	22183832	0.0121395	3085	26358245	0.0117041	3665	28730741	0.0127564	3673	26223346	0.0140066	3949	26962296	0.0146464	3210	21374961	0.0150176	2717	20608942	0.0131836	2932	20367957	0.0143952	2863
K06933 uncharacterized protein	0.00932049	0.0021886	0.0143074	0.0022925	0.000961463	0.0146503	-0.00498688	-0.00755674	-0.00241702	3386	38517452	0.00879082	2574	28642163	0.00898675	1994	26103837	0.00763872	2115	27161364	0.0077868	1832	22945505	0.00798413	1989	22183832	0.00896599	2515	26358245	0.00954161	4272	28730741	0.0148691	4250	26223346	0.0162069	4331	26962296	0.0160632	3360	21374961	0.0157193	3368	20608942	0.0163424	2156	20367957	0.0105853	1878
K03564 peroxiredoxin Q/BCP [EC:1.11.1.15]	0.0250825	0.00188007	0.0213999	0.00124172	0.000964534	0.0146575	0.0036826	0.00182934	0.00553586	10435	38517452	0.0270916	7343	28642163	0.025637	7007	26103837	0.0268428	6852	27161364	0.025227	5964	22945505	0.025992	4986	22183832	0.0224758	6816	26358245	0.0258591	6187	28730741	0.0215344	5817	26223346	0.0221825	5407	26962296	0.0200539	4409	21374961	0.0206269	3951	20608942	0.0191713	4576	20367957	0.0224667	3858
K17828 dihydroorotate dehydrogenase (NAD+) catalytic subunit [EC:1.3.1.14]	0.0439138	0.00388215	0.0515463	0.00121765	0.000966237	0.0146637	-0.00763249	-0.011152	-0.00411302	16400	38517452	0.0425781	12402	28642163	0.0432998	10226	26103837	0.0391743	10781	27161364	0.0396924	9812	22945505	0.0427622	9762	22183832	0.044005	12730	26358245	0.0482961	14797	28730741	0.0515023	13604	26223346	0.0518774	14085	26962296	0.0522396	11259	21374961	0.0526738	10818	20608942	0.0524918	10556	20367957	0.0518265	9429
K03600 stringent starvation protein B	0.000923202	0.000420764	7.70494e-05	8.0128e-05	0.000975402	0.0147829	0.000846152	0.000468518	0.00122379	391	38517452	0.00101512	208	28642163	0.000726202	405	26103837	0.0015515	354	27161364	0.00130332	292	22945505	0.00127258	190	22183832	0.00085648	86	26358245	0.000326274	96	28730741	0.000334137	13	26223346	4.95741e-05	0	26962296	0	0	21374961	0	0	20608942	0	14	20367957	6.87354e-05	16
K02610 ring-1,2-phenylacetyl-CoA epoxidase subunit PaaB	0.000496447	0.000201092	9.91874e-05	5.59323e-05	0.000978515	0.0147904	0.00039726	0.000215637	0.000578882	221	38517452	0.000573766	119	28642163	0.000415471	186	26103837	0.000712539	178	27161364	0.000655343	160	22945505	0.000697304	122	22183832	0.00054995	50	26358245	0.000189694	51	28730741	0.00017751	7	26223346	2.66938e-05	24	26962296	8.90132e-05	28	21374961	0.000130994	9	20608942	4.36704e-05	6	20367957	2.9458e-05	26
K06166 alpha-D-ribose 1-methylphosphonate 5-triphosphate synthase subunit PhnG [EC:2.7.8.37]	0.000405805	0.000177724	6.26308e-05	7.59745e-05	0.000977472	0.0147944	0.000343174	0.000179171	0.000507177	103	38517452	0.000267411	47	28642163	0.000164094	169	26103837	0.000647414	185	27161364	0.000681115	115	22945505	0.000501187	72	22183832	0.000324561	109	26358245	0.000413533	71	28730741	0.000247122	4	26223346	1.52536e-05	29	26962296	0.000107558	2	21374961	9.35674e-06	0	20608942	0	0	20367957	0	4
K02381 FdrA protein	0.0129533	0.00246084	0.00802772	0.00185518	0.000983214	0.0148415	0.0049256	0.00240947	0.00744174	6229	38517452	0.0161719	4602	28642163	0.0160672	3544	26103837	0.0135765	3677	27161364	0.0135376	2944	22945505	0.0128304	2718	22183832	0.0122522	2929	26358245	0.0111123	2321	28730741	0.00807846	1769	26223346	0.0067459	1895	26962296	0.00702833	1292	21374961	0.00604446	1394	20608942	0.00676405	2225	20367957	0.010924	2038
K01525 bis(5'-nucleosyl)-tetraphosphatase (symmetrical) [EC:3.6.1.41]	0.00253834	0.00112693	0.00033404	0.000359281	0.000992568	0.0148832	0.0022043	0.00118202	0.00322657	670	38517452	0.00173947	409	28642163	0.00142796	1200	26103837	0.00459703	1099	27161364	0.00404619	658	22945505	0.00286766	476	22183832	0.00214571	551	26358245	0.00209043	400	28730741	0.00139224	17	26223346	6.48277e-05	0	26962296	0	18	21374961	8.42107e-05	19	20608942	9.2193e-05	52	20367957	0.000255303	58
K01975 RNA 2',3'-cyclic 3'-phosphodiesterase [EC:3.1.4.58]	0.0275289	0.00192838	0.0312322	0.000956736	0.000991476	0.0148866	-0.00370326	-0.0055102	-0.00189633	9984	38517452	0.0259207	7867	28642163	0.0274665	6685	26103837	0.0256093	7602	27161364	0.0279883	6212	22945505	0.0270728	5773	22183832	0.0260235	7406	26358245	0.0280975	9209	28730741	0.0320528	8258	26223346	0.031491	8309	26962296	0.0308171	6747	21374961	0.031565	6696	20608942	0.0324908	6134	20367957	0.0301159	5446
K06945 uncharacterized protein	0.00303405	0.000527607	0.00194292	0.000447416	0.000990364	0.0148897	0.00109113	0.000528931	0.00165332	1515	38517452	0.00393328	977	28642163	0.00341106	746	26103837	0.00285782	973	27161364	0.00358229	654	22945505	0.00285023	586	22183832	0.00264156	738	26358245	0.00279988	631	28730741	0.00219625	558	26223346	0.00212787	492	26962296	0.00182477	258	21374961	0.00120702	311	20608942	0.00150905	375	20367957	0.00184113	340
K18928 L-lactate dehydrogenase complex protein LldE	0.00802903	0.000758345	0.00553269	0.0012934	0.000987959	0.0148933	0.00249633	0.00125314	0.00373953	3231	38517452	0.00838841	2396	28642163	0.00836529	2437	26103837	0.00933579	2097	27161364	0.00772053	1850	22945505	0.00806258	1459	22183832	0.00657686	1961	26358245	0.0074398	2397	28730741	0.00834298	1297	26223346	0.00494597	1440	26962296	0.00534079	1128	21374961	0.0052772	867	20608942	0.00420691	892	20367957	0.00437943	858
K02881 large subunit ribosomal protein L18	0.023917	0.00115111	0.0261303	0.00053022	0.000990262	0.0149081	-0.00221333	-0.00328297	-0.0011437	9122	38517452	0.0236828	6878	28642163	0.0240135	5944	26103837	0.0227706	6265	27161364	0.0230659	5737	22945505	0.0250027	5087	22183832	0.0229311	6187	26358245	0.0234727	7584	28730741	0.0263968	6869	26223346	0.0261942	6988	26962296	0.0259177	5667	21374961	0.0265123	5438	20608942	0.0263866	5391	20367957	0.026468	4486
K04101 protocatechuate 4,5-dioxygenase, beta chain [EC:1.13.11.8]	0.000439063	0.000174228	0.000104805	8.30389e-05	0.00100116	0.0149723	0.000334258	0.00017177	0.000496746	250	38517452	0.000649056	129	28642163	0.000450385	144	26103837	0.000551643	191	27161364	0.000703205	77	22945505	0.000335578	74	22183832	0.000333576	39	26358245	0.000147961	98	28730741	0.000341098	18	26223346	6.86411e-05	5	26962296	1.85444e-05	12	21374961	5.61405e-05	26	20608942	0.000126159	13	20367957	6.38257e-05	5
K02665 type IV pilus assembly protein PilP	0.00511148	0.000779668	0.00358537	0.000530636	0.00100265	0.0149748	0.00152611	0.000751804	0.00230041	2121	38517452	0.00550659	1536	28642163	0.00536272	1428	26103837	0.00547046	1707	27161364	0.00628466	1179	22945505	0.00513826	1188	22183832	0.00535525	972	26358245	0.00368765	1174	28730741	0.00408622	910	26223346	0.00347019	974	26962296	0.00361245	912	21374961	0.00426667	853	20608942	0.00413898	781	20367957	0.00383445	436
K01759 lactoylglutathione lyase [EC:4.4.1.5]	0.0154731	0.00197328	0.0114238	0.00164089	0.00100069	0.0149852	0.00404933	0.00196237	0.0061363	4801	38517452	0.0124645	3426	28642163	0.0119614	4389	26103837	0.0168136	4560	27161364	0.0167886	3728	22945505	0.0162472	3822	22183832	0.0172288	4495	26358245	0.0170535	4375	28730741	0.0152276	2927	26223346	0.0111618	2896	26962296	0.0107409	2406	21374961	0.0112562	1937	20608942	0.00939883	2368	20367957	0.0116261	1688
K22438 trans-aconitate 3-methyltransferase [EC:2.1.1.145]	0.00150957	0.000223118	0.000749447	0.000395592	0.00100513	0.014992	0.000760127	0.000382486	0.00113777	677	38517452	0.00175764	406	28642163	0.00141749	511	26103837	0.00195757	376	27161364	0.00138432	296	22945505	0.00129001	342	22183832	0.00154166	386	26358245	0.00146444	363	28730741	0.00126346	136	26223346	0.000518622	113	26962296	0.000419104	350	21374961	0.00163743	55	20608942	0.000266874	147	20367957	0.000721722	176
K04015 protein NrfD	0.00394862	0.000770608	0.00245631	0.000489306	0.00101441	0.0151105	0.00149231	0.000739564	0.00224506	1742	38517452	0.00452263	1119	28642163	0.00390683	944	26103837	0.00361633	1005	27161364	0.00370011	1227	22945505	0.00534745	1010	22183832	0.00455287	760	26358245	0.00288335	879	28730741	0.00305944	502	26223346	0.00191432	620	26962296	0.00229951	716	21374961	0.00334971	649	20608942	0.00314912	490	20367957	0.00240574	352
K00341 NADH-quinone oxidoreductase subunit L [EC:7.1.1.2]	0.101003	0.0086828	0.0841058	0.00575383	0.00101742	0.0151353	0.016897	0.00833109	0.0254628	42380	38517452	0.110028	32114	28642163	0.112121	28488	26103837	0.109133	27966	27161364	0.102962	22716	22945505	0.0989998	21591	22183832	0.0973276	23948	26358245	0.0908558	24879	28730741	0.0865937	22600	26223346	0.0861827	22650	26962296	0.0840062	16672	21374961	0.0779978	16646	20608942	0.0807708	16408	20367957	0.0805579	13982
K09767 cyclic-di-GMP-binding protein	0.00556207	0.0012397	0.00313586	0.000854839	0.00102013	0.0151358	0.00242621	0.00119085	0.00366157	2384	38517452	0.0061894	2018	28642163	0.00704556	1726	26103837	0.00661205	1815	27161364	0.00668229	1284	22945505	0.00559587	986	22183832	0.00444468	860	26358245	0.00326274	1340	28730741	0.00466399	697	26223346	0.00265794	835	26962296	0.00309692	477	21374961	0.00223158	550	20608942	0.00266874	617	20367957	0.00302927	421
K03667 ATP-dependent HslUV protease ATP-binding subunit HslU	0.0298833	0.00230461	0.0254484	0.00137577	0.00101925	0.0151425	0.00443496	0.00221227	0.00665764	11553	38517452	0.0299942	8958	28642163	0.0312756	8816	26103837	0.0337728	8837	27161364	0.0325352	6115	22945505	0.0266501	6350	22183832	0.0286245	7441	26358245	0.0282303	8040	28730741	0.027984	6308	26223346	0.0240549	6831	26962296	0.0253354	5509	21374961	0.0257731	4928	20608942	0.023912	5254	20367957	0.0257954	4300
K00324 H+-translocating NAD(P) transhydrogenase subunit alpha [EC:1.6.1.2 7.1.1.1]	0.0122701	0.00266178	0.00714833	0.00160938	0.00102761	0.0152067	0.00512177	0.00254821	0.00769533	4229	38517452	0.0109794	2910	28642163	0.0101598	4582	26103837	0.017553	4095	27161364	0.0150766	3031	22945505	0.0132096	2398	22183832	0.0108097	2358	26358245	0.00894597	3283	28730741	0.0114268	1930	26223346	0.00735985	2008	26962296	0.00744744	1431	21374961	0.00669475	1495	20608942	0.00725413	1000	20367957	0.00490967	868
K09003 uncharacterized protein	0.0119201	0.00416134	0.020141	0.000995576	0.00102634	0.0152079	-0.0082209	-0.011967	-0.00447475	3709	38517452	0.0096294	2934	28642163	0.0102436	1813	26103837	0.00694534	2038	27161364	0.00750331	2746	22945505	0.0119675	2781	22183832	0.0125362	4388	26358245	0.0166475	5714	28730741	0.0198881	5185	26223346	0.0197725	5476	26962296	0.0203098	4359	21374961	0.020393	4358	20608942	0.0211462	3770	20367957	0.0185095	3901
K01647 citrate synthase [EC:2.3.3.1]	0.0427031	0.0028094	0.0328311	0.00516241	0.00103078	0.0152337	0.00987195	0.00497222	0.0147717	16137	38517452	0.0418953	11739	28642163	0.040985	12347	26103837	0.0472996	12800	27161364	0.0471258	9701	22945505	0.0422784	8672	22183832	0.0390915	10631	26358245	0.0403327	12244	28730741	0.0426164	8350	26223346	0.0318419	8693	26962296	0.0322413	5988	21374961	0.0280141	5837	20608942	0.0283227	6177	20367957	0.030327	5251
K03110 fused signal recognition particle receptor	0.0432684	0.00157384	0.046302	0.000990103	0.00104294	0.0152537	-0.00303359	-0.00456784	-0.00149935	15819	38517452	0.0410697	12308	28642163	0.0429716	11065	26103837	0.0423884	11340	27161364	0.0417505	9924	22945505	0.0432503	9858	22183832	0.0444378	11552	26358245	0.0438269	13346	28730741	0.046452	11809	26223346	0.0450324	12510	26962296	0.0463981	10177	21374961	0.0476118	9864	20608942	0.0478627	9486	20367957	0.0465732	8347
K17829 crotonyl-CoA reductase [EC:1.3.1.86]	0.000391438	0.000169862	6.02239e-05	5.09853e-05	0.00103498	0.0152558	0.000331214	0.000177454	0.000484973	76	38517452	0.000197313	63	28642163	0.000219955	134	26103837	0.000513334	162	27161364	0.000596435	146	22945505	0.00063629	100	22183832	0.000450779	85	26358245	0.00032248	56	28730741	0.000194913	9	26223346	3.43206e-05	0	26962296	0	0	21374961	0	21	20608942	0.000101898	16	20367957	7.85548e-05	13
K01819 galactose-6-phosphate isomerase [EC:5.3.1.26]	0.000280179	0.000234588	0.00150288	0.000634917	0.00104177	0.0152563	-0.0012227	-0.00180267	-0.000642738	9	38517452	2.3366e-05	0	28642163	0	0	26103837	0	58	27161364	0.000213539	139	22945505	0.000605783	105	22183832	0.000473318	132	26358245	0.000500792	122	28730741	0.000424632	401	26223346	0.00152917	428	26962296	0.0015874	569	21374961	0.00266199	314	20608942	0.00152361	351	20367957	0.0017233	327
K02961 small subunit ribosomal protein S17	0.0201606	0.000704186	0.0217933	0.00077317	0.00103699	0.0152655	-0.00163274	-0.0024812	-0.000784275	7427	38517452	0.0192822	5862	28642163	0.0204663	4987	26103837	0.0191045	5379	27161364	0.0198039	4752	22945505	0.0207099	4469	22183832	0.0201453	5373	26358245	0.0203845	6145	28730741	0.0213882	5454	26223346	0.0207983	5908	26962296	0.0219121	4701	21374961	0.021993	4706	20608942	0.0228347	4582	20367957	0.0224961	4064
K22441 diamine N-acetyltransferase [EC:2.3.1.57]	0.006181	0.000980823	0.004295	0.000598127	0.00103846	0.0152673	0.001886	0.000936058	0.00283594	2113	38517452	0.00548582	1440	28642163	0.00502755	1436	26103837	0.00550111	1621	27161364	0.00596804	1434	22945505	0.00624959	1610	22183832	0.00725754	2159	26358245	0.00819099	1657	28730741	0.00576734	1074	26223346	0.00409559	1116	26962296	0.00413911	835	21374961	0.00390644	668	20608942	0.00324131	976	20367957	0.00479184	962
K00150 glyceraldehyde-3-phosphate dehydrogenase (NAD(P)) [EC:1.2.1.59]	0.00210482	0.000416976	0.00366373	0.000817341	0.00104137	0.0152703	-0.00155891	-0.00232751	-0.00079031	883	38517452	0.00229247	708	28642163	0.00247188	365	26103837	0.00139826	414	27161364	0.00152422	539	22945505	0.00234904	588	22183832	0.00265058	577	26358245	0.00218907	564	28730741	0.00196305	894	26223346	0.00340918	1059	26962296	0.00392771	1122	21374961	0.00524913	718	20608942	0.00348392	785	20367957	0.00385409	747
K00055 aryl-alcohol dehydrogenase [EC:1.1.1.90]	0.0039921	0.00148771	0.00704836	0.00125722	0.00103472	0.0152719	-0.00305626	-0.00463937	-0.00147315	1440	38517452	0.00373857	1085	28642163	0.00378812	629	26103837	0.00240961	637	27161364	0.00234524	799	22945505	0.00348216	775	22183832	0.00349354	1499	26358245	0.00568703	2009	28730741	0.00699251	2020	26223346	0.00770306	2047	26962296	0.00759208	1561	21374961	0.00730294	1487	20608942	0.00721531	1041	20367957	0.00511097	876
K03169 DNA topoisomerase III [EC:5.99.1.2]	0.0125872	0.00442051	0.00412262	0.00184682	0.00104135	0.0152899	0.0084646	0.00439301	0.0125362	3312	38517452	0.0085987	2215	28642163	0.00773335	5061	26103837	0.019388	5329	27161364	0.0196198	3116	22945505	0.01358	2630	22183832	0.0118555	3076	26358245	0.01167	2371	28730741	0.00825248	645	26223346	0.00245964	647	26962296	0.00239965	535	21374961	0.00250293	395	20608942	0.00191664	1179	20367957	0.0057885	930
K00101 L-lactate dehydrogenase (cytochrome) [EC:1.1.2.3]	0.00374607	0.00136869	0.00113983	0.000670138	0.00105339	0.0153073	0.00260624	0.0013258	0.00388668	945	38517452	0.00245343	716	28642163	0.00249981	1518	26103837	0.00581524	1221	27161364	0.00449536	1294	22945505	0.00563945	901	22183832	0.00406152	729	26358245	0.00276574	643	28730741	0.00223802	138	26223346	0.000526249	139	26962296	0.000515535	90	21374961	0.000421053	91	20608942	0.000441556	384	20367957	0.00188531	288
K09781 uncharacterized protein	0.00338681	0.000803832	0.00163023	0.000793297	0.00105105	0.0153127	0.00175657	0.000841036	0.00267211	1166	38517452	0.0030272	732	28642163	0.00255567	1146	26103837	0.00439016	1004	27161364	0.00369643	1035	22945505	0.00451069	845	22183832	0.00380908	553	26358245	0.00209802	864	28730741	0.00300723	345	26223346	0.00131562	320	26962296	0.00118684	205	21374961	0.000959066	167	20608942	0.000810328	309	20367957	0.00151709	242
K08720 outer membrane protein OmpU	0.000225304	9.35911e-05	4.28534e-05	2.70451e-05	0.00105025	0.0153209	0.000182451	9.78312e-05	0.000267071	78	38517452	0.000202506	68	28642163	0.000237412	72	26103837	0.000275822	17	27161364	6.25889e-05	55	22945505	0.000239698	91	22183832	0.000410209	39	26358245	0.000147961	65	28730741	0.000226239	12	26223346	4.57608e-05	19	26962296	7.04688e-05	6	21374961	2.80702e-05	12	20608942	5.82272e-05	0	20367957	0	5
K08998 uncharacterized protein	0.0101826	0.00117207	0.00789042	0.000824232	0.00105329	0.0153256	0.00229214	0.00111799	0.00346628	3785	38517452	0.00982671	2623	28642163	0.00915783	2931	26103837	0.0112282	3117	27161364	0.0114759	2596	22945505	0.0113138	2464	22183832	0.0111072	2400	26358245	0.00910531	2369	28730741	0.00824552	1841	26223346	0.00702046	1977	26962296	0.00733246	1563	21374961	0.00731229	1468	20608942	0.00712312	1782	20367957	0.00874904	1399
K04033 AraC family transcriptional regulator, ethanolamine operon transcriptional activator	0.0036159	0.00151478	0.000659583	0.000420741	0.00105682	0.0153374	0.00295632	0.00158825	0.0043244	696	38517452	0.00180697	551	28642163	0.00192374	1508	26103837	0.00577693	1532	27161364	0.00564036	1125	22945505	0.00490292	703	22183832	0.00316897	875	26358245	0.00331964	686	28730741	0.00238769	192	26223346	0.000732172	82	26962296	0.000304128	78	21374961	0.000364913	33	20608942	0.000160125	168	20367957	0.000824825	56
K10210 diapolycopene oxygenase [EC:1.14.99.44]	0.00336323	0.000985281	0.00148312	0.000543082	0.00105022	0.0153402	0.00188011	0.00094308	0.00281713	1315	38517452	0.00341404	1052	28642163	0.00367291	1262	26103837	0.00483454	1125	27161364	0.00414191	850	22945505	0.00370443	690	22183832	0.00311037	724	26358245	0.00274677	368	28730741	0.00128086	323	26223346	0.00123173	274	26962296	0.00101623	218	21374961	0.00101988	194	20608942	0.000941339	402	20367957	0.00197369	409
K07001 NTE family protein	0.0850317	0.0132799	0.0597982	0.00658089	0.00106904	0.015396	0.0252335	0.0127918	0.0376752	32821	38517452	0.0852107	22559	28642163	0.0787615	26888	26103837	0.103004	29288	27161364	0.10783	18451	22945505	0.0804123	19002	22183832	0.085657	17247	26358245	0.065433	21245	28730741	0.0739452	14886	26223346	0.0567662	15554	26962296	0.057688	11895	21374961	0.0556492	9953	20608942	0.0482946	13311	20367957	0.0653527	10434
K06169 tRNA-(ms[2]io[6]A)-hydroxylase [EC:1.-.-.-]	0.000946481	0.000345386	0.000263295	6.6291e-05	0.0010759	0.0153966	0.000683186	0.000373179	0.000993192	193	38517452	0.000501072	130	28642163	0.000453876	407	26103837	0.00155916	331	27161364	0.00121864	231	22945505	0.00100673	220	22183832	0.000991713	287	26358245	0.00108884	216	28730741	0.000751808	89	26223346	0.000339392	94	26962296	0.000348635	44	21374961	0.000205848	49	20608942	0.000237761	42	20367957	0.000206206	31
K07274 MipA family protein	0.000876863	0.000237918	0.000412372	0.000167078	0.00106512	0.0153986	0.000464491	0.000226242	0.000702741	280	38517452	0.000726943	169	28642163	0.000590039	314	26103837	0.00120289	265	27161364	0.000975651	265	22945505	0.00115491	113	22183832	0.00050938	222	26358245	0.000842241	291	28730741	0.00101285	93	26223346	0.000354646	118	26962296	0.000437648	44	21374961	0.000205848	82	20608942	0.000397886	37	20367957	0.000181658	80
K00242 succinate dehydrogenase / fumarate reductase, membrane anchor subunit	0.00428063	0.000625403	0.00285519	0.000670392	0.00106398	0.0154017	0.00142544	0.000681881	0.00216899	1760	38517452	0.00456936	1009	28642163	0.00352278	1296	26103837	0.00496479	1174	27161364	0.00432232	1160	22945505	0.00505546	1051	22183832	0.00473768	878	26358245	0.00333103	1075	28730741	0.00374164	764	26223346	0.00291343	667	26962296	0.00247382	418	21374961	0.00195556	514	20608942	0.00249406	614	20367957	0.00301454	403
K10715 two-component system, sensor histidine kinase RpfC [EC:2.7.13.3]	0.00319281	0.00115361	0.00100123	0.000584832	0.00107084	0.0154023	0.00219158	0.00110766	0.0032755	1127	38517452	0.00292595	620	28642163	0.00216464	1372	26103837	0.00525593	1031	27161364	0.00379583	997	22945505	0.00434508	731	22183832	0.00329519	558	26358245	0.00211698	472	28730741	0.00164284	72	26223346	0.000274565	189	26962296	0.000700979	257	21374961	0.00120234	147	20608942	0.000713283	186	20367957	0.000913199	221
K03189 urease accessory protein	0.000965297	0.000336623	0.000324642	0.000184414	0.00106879	0.0154122	0.000640655	0.000320827	0.000960482	256	38517452	0.000664634	155	28642163	0.00054116	328	26103837	0.00125652	344	27161364	0.0012665	306	22945505	0.00133359	292	22183832	0.00131627	145	26358245	0.000550112	228	28730741	0.000793575	58	26223346	0.000221177	89	26962296	0.000330091	24	21374961	0.000112281	25	20608942	0.000121307	61	20367957	0.00029949	50
K06142 outer membrane protein	0.0100629	0.00169895	0.00676744	0.000502321	0.00107564	0.0154126	0.00329544	0.00175828	0.00483259	3839	38517452	0.00996691	3264	28642163	0.0113958	3055	26103837	0.0117033	3322	27161364	0.0122306	2302	22945505	0.0100325	2263	22183832	0.0102011	2120	26358245	0.00804302	1991	28730741	0.00692986	1907	26223346	0.00727215	1926	26962296	0.00714331	1340	21374961	0.00626902	1383	20608942	0.00671068	1499	20367957	0.0073596	1267
K01638 malate synthase [EC:2.3.3.9]	0.00630434	0.00229653	0.00192989	0.00130457	0.00107429	0.0154126	0.00437445	0.00217946	0.00656944	2154	38517452	0.00559227	1572	28642163	0.00548841	2427	26103837	0.00929748	1751	27161364	0.00644666	2379	22945505	0.010368	1366	22183832	0.00615764	1026	26358245	0.00389252	917	28730741	0.0031917	203	26223346	0.000774119	145	26962296	0.000537788	153	21374961	0.000715791	127	20608942	0.000616237	783	20367957	0.00384427	500
K03455 monovalent cation	0.0370241	0.00471708	0.0273629	0.00399167	0.00106385	0.0154197	0.00966115	0.00463895	0.0146833	15819	38517452	0.0410697	11662	28642163	0.0407162	10852	26103837	0.0415724	10897	27161364	0.0401195	8774	22945505	0.0382384	7199	22183832	0.0324516	7279	26358245	0.0276156	9886	28730741	0.0344091	7573	26223346	0.0288788	7811	26962296	0.0289701	5773	21374961	0.0270082	5683	20608942	0.0275754	4182	20367957	0.0205323	3932
K02313 chromosomal replication initiator protein	0.0884171	0.00296774	0.0980495	0.00504623	0.00107396	0.0154275	-0.00963241	-0.0144855	-0.00477931	32776	38517452	0.0850939	25543	28642163	0.0891797	22307	26103837	0.0854549	23234	27161364	0.0855406	20930	22945505	0.0912161	20573	22183832	0.0927387	22765	26358245	0.0863677	26359	28730741	0.0917449	26469	26223346	0.100937	26576	26962296	0.0985673	22841	21374961	0.106859	21379	20608942	0.103737	18801	20367957	0.0923068	17211
K12405 (3R)-3-hydroxyacyl-CoA dehydrogenase / 3a,7a,12a-trihydroxy-5b-cholest-24-enoyl-CoA hydratase / enoyl-CoA hydratase 2 [EC:1.1.1.- 4.2.1.107 4.2.1.119]	0.0186097	0.00265107	0.0134046	0.00192166	0.00106867	0.0154301	0.00520509	0.00252648	0.00788371	5545	38517452	0.0143961	4440	28642163	0.0155016	4852	26103837	0.0185873	5222	27161364	0.0192258	4922	22945505	0.0214508	4813	22183832	0.021696	5615	26358245	0.0213026	4803	28730741	0.0167173	3421	26223346	0.0130456	3375	26962296	0.0125175	2047	21374961	0.00957663	2522	20608942	0.0122374	3321	20367957	0.016305	2696
K06944 uncharacterized protein	0.0286416	0.00282682	0.0342796	0.00220414	0.00108022	0.0154389	-0.00563799	-0.00856013	-0.00271586	10571	38517452	0.0274447	8392	28642163	0.0292995	6539	26103837	0.02505	7125	27161364	0.0262321	6129	22945505	0.0267111	6628	22183832	0.0298776	7859	26358245	0.0298161	9970	28730741	0.0347015	9139	26223346	0.0348506	9224	26962296	0.0342107	7301	21374961	0.0341568	7200	20608942	0.0349363	6125	20367957	0.0300717	5774
K18700 fluoroacetyl-CoA thioesterase [EC:3.1.2.29]	0.00598152	0.000316417	0.00517232	0.000405797	0.00108181	0.0154422	0.0008092	0.000389718	0.00122868	2341	38517452	0.00607776	1798	28642163	0.00627746	1510	26103837	0.00578459	1648	27161364	0.00606744	1389	22945505	0.00605347	1442	22183832	0.00650023	1473	26358245	0.00558838	1581	28730741	0.00550282	1390	26223346	0.00530062	1554	26962296	0.0057636	1113	21374961	0.00520703	910	20608942	0.00441556	969	20367957	0.00475747	918
K09773 [pyruvate, water dikinase]-phosphate phosphotransferase / [pyruvate, water dikinase] kinase [EC:2.7.4.28 2.7.11.33]	0.00614214	0.000759546	0.00399774	0.00110525	0.00108571	0.0154587	0.0021444	0.00104401	0.0032448	2422	38517452	0.00628806	1697	28642163	0.00592483	1939	26103837	0.00742803	1834	27161364	0.00675224	1313	22945505	0.00572225	1048	22183832	0.00472416	1513	26358245	0.00574014	1884	28730741	0.00655744	1050	26223346	0.00400407	1129	26962296	0.00418733	886	21374961	0.00414504	485	20608942	0.00235335	638	20367957	0.00313237	539
K20023 L-talarate/galactarate dehydratase [EC:4.2.1.156 4.2.1.42]	0.00359958	0.000596366	0.00246724	0.000324617	0.0010854	0.0154738	0.00113233	0.000566292	0.00169837	1521	38517452	0.00394886	1327	28642163	0.00463303	968	26103837	0.00370827	859	27161364	0.00316258	757	22945505	0.00329912	731	22183832	0.00329519	1091	26358245	0.00413912	750	28730741	0.00261044	741	26223346	0.00282573	793	26962296	0.00294114	556	21374961	0.00260117	474	20608942	0.00229997	409	20367957	0.00200806	366
K07641 two-component system, OmpR family, sensor histidine kinase CreC [EC:2.7.13.3]	0.00159847	0.000603957	0.000401641	0.000101201	0.00109185	0.0155071	0.00119683	0.000655357	0.00173829	557	38517452	0.0014461	388	28642163	0.00135465	682	26103837	0.00261264	573	27161364	0.00210961	496	22945505	0.00216164	320	22183832	0.00144249	190	26358245	0.000720837	270	28730741	0.00093976	93	26223346	0.000354646	131	26962296	0.000485864	49	21374961	0.00022924	79	20608942	0.000383329	114	20367957	0.000559703	53
K12583 phosphatidylinositol alpha 1,6-mannosyltransferase [EC:2.4.1.-]	0.0104296	0.00265625	0.00539162	0.00121068	0.00109089	0.0155128	0.00503796	0.00257234	0.00750357	3292	38517452	0.00854678	2357	28642163	0.00822913	3830	26103837	0.0146722	3470	27161364	0.0127755	2983	22945505	0.0130004	2492	22183832	0.0112334	1996	26358245	0.00757258	2128	28730741	0.0074067	1139	26223346	0.00434346	1426	26962296	0.00528887	913	21374961	0.00427135	685	20608942	0.0033238	1350	20367957	0.00662806	1090
K03113 translation initiation factor 1	0.00128959	0.000452314	0.000401511	9.73994e-05	0.00109613	0.0155482	0.000888082	0.000481558	0.00129461	732	38517452	0.00190044	398	28642163	0.00138956	471	26103837	0.00180433	448	27161364	0.0016494	267	22945505	0.00116363	176	22183832	0.000793371	281	26358245	0.00106608	158	28730741	0.000549934	84	26223346	0.000320325	132	26962296	0.000489573	88	21374961	0.000411697	115	20608942	0.00055801	53	20367957	0.000260213	80
K08963 methylthioribose-1-phosphate isomerase [EC:5.3.1.23]	0.0475114	0.0028178	0.0529926	0.000718783	0.00110813	0.0156791	-0.0054812	-0.008021	-0.00294141	18532	38517452	0.0481133	14299	28642163	0.0499229	11745	26103837	0.0449934	12370	27161364	0.0455426	10054	22945505	0.0438169	10251	22183832	0.0462093	12762	26358245	0.0484175	15249	28730741	0.0530756	13943	26223346	0.0531702	13991	26962296	0.051891	11262	21374961	0.0526878	10969	20608942	0.0532245	10656	20367957	0.0523175	9672
K05814 sn-glycerol 3-phosphate transport system permease protein	0.00691173	0.00093641	0.0051338	0.000540796	0.00110746	0.0156893	0.00177793	0.00088033	0.00267552	2477	38517452	0.00643085	1764	28642163	0.00615875	2033	26103837	0.00778813	1961	27161364	0.00721981	1861	22945505	0.00811052	1633	22183832	0.00736122	1902	26358245	0.00721596	1439	28730741	0.00500857	1334	26223346	0.00508707	1405	26962296	0.00521098	935	21374961	0.00437428	915	20608942	0.00443982	1270	20367957	0.00623528	923
K06917 tRNA 2-selenouridine synthase [EC:2.9.1.-]	0.00208707	0.000660473	0.000812003	0.000193134	0.00111242	0.0157004	0.00127507	0.000677694	0.00187244	871	38517452	0.00226131	714	28642163	0.00249283	710	26103837	0.00271991	731	27161364	0.00269132	585	22945505	0.00254952	432	22183832	0.00194736	283	26358245	0.00107367	276	28730741	0.000960644	271	26223346	0.00103343	282	26962296	0.0010459	171	21374961	0.000800001	174	20608942	0.000844294	125	20367957	0.000613709	98
K04113 benzoyl-CoA reductase subunit B [EC:1.3.7.8]	0.00391719	0.000991484	0.00192042	0.000810225	0.00111196	0.0157136	0.00199677	0.000954911	0.00303864	1688	38517452	0.00438243	1459	28642163	0.00509389	1269	26103837	0.00486135	1361	27161364	0.00501079	717	22945505	0.0031248	716	22183832	0.00322758	894	26358245	0.00339173	645	28730741	0.00224498	318	26223346	0.00121266	330	26962296	0.00122393	302	21374961	0.00141287	379	20608942	0.00183901	304	20367957	0.00149254	291
K02043 GntR family transcriptional regulator, phosphonate transport system regulatory protein	0.000304847	0.000127752	6.32416e-05	6.9382e-05	0.00111633	0.015736	0.000241605	0.000120392	0.000362819	44	38517452	0.000114234	32	28642163	0.000111723	87	26103837	0.000333284	121	27161364	0.000445486	108	22945505	0.00047068	55	22183832	0.000247928	95	26358245	0.000360419	102	28730741	0.00035502	0	26223346	0	0	26962296	0	19	21374961	8.88891e-05	0	20608942	0	17	20367957	8.34644e-05	0
K18476 TetR/AcrR family transcriptional regulator, tetracycline repressor protein	0.00278125	0.00114134	0.000575402	0.00032027	0.0011198	0.0157651	0.00220584	0.00117476	0.00323693	1013	38517452	0.00262998	708	28642163	0.00247188	916	26103837	0.00350906	1053	27161364	0.00387683	1022	22945505	0.00445403	687	22183832	0.00309685	337	26358245	0.00127854	268	28730741	0.000932799	104	26223346	0.000396593	75	26962296	0.000278166	30	21374961	0.000140351	57	20608942	0.000276579	205	20367957	0.00100648	130
K04488 nitrogen fixation protein NifU and related proteins	0.0383089	0.00335134	0.0446357	0.00176242	0.00112373	0.0158007	-0.00632686	-0.00949151	-0.0031622	14786	38517452	0.0383878	11195	28642163	0.0390857	8716	26103837	0.0333897	9180	27161364	0.033798	8524	22945505	0.0371489	8747	22183832	0.0394296	10816	26358245	0.0410346	12698	28730741	0.0441966	11466	26223346	0.0437244	11127	26962296	0.0412687	9802	21374961	0.0458574	8978	20608942	0.0435636	9625	20367957	0.0472556	8372
K02659 twitching motility protein PilI	0.00102482	0.000445946	0.000157919	0.000108921	0.00112666	0.0158223	0.000866904	0.000465301	0.00126851	328	38517452	0.000851562	259	28642163	0.000904261	480	26103837	0.00183881	325	27161364	0.00119655	319	22945505	0.00139025	256	22183832	0.00115399	111	26358245	0.000421121	127	28730741	0.000442035	0	26223346	0	12	26962296	4.45066e-05	39	21374961	0.000182456	31	20608942	0.00015042	32	20367957	0.00015711	31
K02221 YggT family protein	0.00739918	0.000871699	0.00559699	0.000773357	0.0011305	0.0158564	0.00180218	0.000856263	0.0027481	3118	38517452	0.00809503	2102	28642163	0.00733883	2127	26103837	0.00814823	2186	27161364	0.0080482	1934	22945505	0.00842867	1530	22183832	0.00689691	1588	26358245	0.00602468	1785	28730741	0.00621286	1534	26223346	0.00584975	1479	26962296	0.00548544	1047	21374961	0.00489825	872	20608942	0.00423117	1148	20367957	0.0056363	1000
K09758 aspartate 4-decarboxylase [EC:4.1.1.12]	0.00187238	0.000624888	0.000651434	0.000130818	0.00113663	0.0159227	0.00122095	0.000659525	0.00178237	835	38517452	0.00216785	609	28642163	0.00212624	703	26103837	0.00269309	665	27161364	0.00244833	473	22945505	0.00206141	369	22183832	0.00166337	206	26358245	0.000781539	298	28730741	0.00103722	189	26223346	0.000720732	149	26962296	0.000552624	141	21374961	0.00065965	171	20608942	0.000829737	170	20367957	0.000834644	78
K03192 urease accessory protein	0.00162805	0.000518431	0.000565601	0.000451462	0.00114689	0.0160267	0.00106245	0.000504173	0.00162072	367	38517452	0.000952815	322	28642163	0.00112422	618	26103837	0.00236747	593	27161364	0.00218325	498	22945505	0.00217036	343	22183832	0.00154617	289	26358245	0.00109643	455	28730741	0.00158367	59	26223346	0.00022499	91	26962296	0.000337508	83	21374961	0.000388305	62	20608942	0.00030084	55	20367957	0.000270032	57
K09889 ribosome-associated protein	0.00102427	0.000459114	0.000132203	0.000105623	0.00114857	0.0160303	0.000892071	0.000479036	0.00130511	451	38517452	0.0011709	242	28642163	0.000844908	474	26103837	0.00181583	389	27161364	0.00143218	290	22945505	0.00126386	186	22183832	0.000838448	99	26358245	0.000375594	130	28730741	0.000452477	0	26223346	0	5	26962296	1.85444e-05	9	21374961	4.21053e-05	12	20608942	5.82272e-05	47	20367957	0.000230755	42
K07390 monothiol glutaredoxin	0.00241538	0.00070043	0.000917437	0.000678308	0.00116185	0.0160372	0.00149794	0.000707449	0.00228844	563	38517452	0.00146168	459	28642163	0.00160253	873	26103837	0.00334434	964	27161364	0.00354916	523	22945505	0.00227931	454	22183832	0.00204654	632	26358245	0.00239773	759	28730741	0.00264177	164	26223346	0.000625397	155	26962296	0.000574877	133	21374961	0.000622223	73	20608942	0.000354215	132	20367957	0.000648077	65
K03686 molecular chaperone DnaJ	0.087741	0.00470601	0.0966264	0.00195926	0.0011463	0.0160383	-0.00888546	-0.0132188	-0.0045521	32909	38517452	0.0854392	24202	28642163	0.0844978	21580	26103837	0.0826698	22543	27161364	0.0829966	20500	22945505	0.0893421	19764	22183832	0.0890919	23712	26358245	0.0899605	28136	28730741	0.0979299	25517	26223346	0.0973064	25518	26962296	0.0946433	21345	21374961	0.0998598	20129	20608942	0.0976712	18922	20367957	0.0929008	17394
K01713 cyclohexadienyl dehydratase [EC:4.2.1.51 4.2.1.91]	0.00147014	0.000468622	0.000572425	0.000139587	0.0011609	0.0160437	0.000897715	0.000473621	0.00132181	451	38517452	0.0011709	344	28642163	0.00120103	590	26103837	0.0022602	582	27161364	0.00214275	337	22945505	0.0014687	235	22183832	0.00105933	414	26358245	0.00157067	255	28730741	0.000887551	122	26223346	0.000465234	141	26962296	0.000522952	129	21374961	0.00060351	106	20608942	0.00051434	122	20367957	0.00059898	83
K03669 membrane glycosyltransferase [EC:2.4.1.-]	0.00700359	0.00253801	0.00223973	0.00131161	0.00116821	0.0160466	0.00476386	0.00237306	0.00715466	1215	38517452	0.00315441	926	28642163	0.003233	2478	26103837	0.00949286	2724	27161364	0.010029	2050	22945505	0.00893421	1691	22183832	0.00762267	2107	26358245	0.0079937	1600	28730741	0.00556895	286	26223346	0.00109063	204	26962296	0.000756612	179	21374961	0.000837428	229	20608942	0.00111117	733	20367957	0.00359879	557
K14938 cholesterol 7-desaturase [EC:1.14.19.21]	0.0015721	0.000648928	0.000351484	0.000290456	0.00115836	0.0160479	0.00122062	0.000619321	0.00182191	241	38517452	0.00062569	238	28642163	0.000830943	664	26103837	0.00254369	620	27161364	0.00228265	285	22945505	0.00124207	275	22183832	0.00123964	536	26358245	0.00203352	511	28730741	0.00177858	50	26223346	0.00019067	124	26962296	0.000459901	61	21374961	0.000285381	33	20608942	0.000160125	14	20367957	6.87354e-05	13
K07478 putative ATPase	0.0814594	0.0038687	0.088823	0.00124941	0.00117706	0.0160509	-0.00736357	-0.0108748	-0.00385238	31489	38517452	0.0817526	24064	28642163	0.084016	19764	26103837	0.075713	20954	27161364	0.0771463	18320	22945505	0.0798413	18310	22183832	0.0825376	21512	26358245	0.0816139	25586	28730741	0.0890544	23723	26223346	0.0904652	23729	26962296	0.0880081	18773	21374961	0.0878271	18749	20608942	0.0909751	17981	20367957	0.0882808	16157
K06606 2-keto-myo-inositol isomerase [EC:5.3.99.11]	0.007921	0.00153136	0.0116135	0.00182801	0.00115577	0.0160514	-0.00369249	-0.00563122	-0.00175376	3061	38517452	0.00794705	1974	28642163	0.00689194	1796	26103837	0.00688021	1858	27161364	0.0068406	1884	22945505	0.00821076	1813	22183832	0.00817262	3073	26358245	0.0116586	1944	28730741	0.00676627	3617	26223346	0.0137931	3382	26962296	0.0125434	2739	21374961	0.0128141	2715	20608942	0.0131739	2252	20367957	0.0110566	2173
K21495 antitoxin FitA	0.00405286	0.00101805	0.00212196	0.000626549	0.00115742	0.0160546	0.0019309	0.000943053	0.00291874	1469	38517452	0.00381386	981	28642163	0.00342502	1495	26103837	0.00572713	1511	27161364	0.00556305	993	22945505	0.00432765	816	22183832	0.00367835	829	26358245	0.00314513	788	28730741	0.00274271	350	26223346	0.00133469	444	26962296	0.00164674	310	21374961	0.0014503	337	20608942	0.00163521	602	20367957	0.00295562	490
K06596 chemosensory pili system protein ChpA (sensor histidine kinase/response regulator)	0.00626371	0.00242077	0.00157706	0.000571914	0.00116597	0.0160548	0.00468665	0.00250788	0.00686542	2474	38517452	0.00642306	1704	28642163	0.00594927	2626	26103837	0.0100598	2300	27161364	0.00846791	1758	22945505	0.00766163	1367	22183832	0.00616215	682	26358245	0.00258743	804	28730741	0.0027984	210	26223346	0.000800813	256	26962296	0.000949474	258	21374961	0.00120702	246	20608942	0.00119366	387	20367957	0.00190004	346
K16216 benzil reductase ((S)-benzoin forming) [EC:1.1.1.320]	0.00163991	0.000669626	0.000357808	0.000198017	0.0011675	0.0160564	0.0012821	0.000676238	0.00188796	293	38517452	0.000760694	179	28642163	0.000624953	623	26103837	0.00238662	688	27161364	0.00253301	469	22945505	0.00204397	442	22183832	0.00199244	389	26358245	0.00147582	374	28730741	0.00130174	81	26223346	0.000308885	90	26962296	0.000333799	35	21374961	0.000163743	12	20608942	5.82272e-05	64	20367957	0.000314219	72
K06883 uncharacterized protein	0.0238241	0.00292997	0.0183208	0.00135056	0.00116478	0.0160581	0.00550333	0.00278055	0.00822611	9349	38517452	0.0242721	7029	28642163	0.0245407	7538	26103837	0.028877	7505	27161364	0.0276312	4770	22945505	0.0207884	4877	22183832	0.0219845	5870	26358245	0.0222701	5812	28730741	0.0202292	4322	26223346	0.0164815	4800	26962296	0.0178026	3849	21374961	0.0180071	3953	20608942	0.019181	3788	20367957	0.0185978	2951
K09583 protein disulfide-isomerase A5 [EC:5.3.4.1]	0.000112142	0.00012721	0.000665092	0.000293786	0.00116058	0.016059	-0.00055295	-0.000824352	-0.000281548	46	38517452	0.000119426	18	28642163	6.28444e-05	13	26103837	4.98011e-05	24	27161364	8.83608e-05	0	22945505	0	0	22183832	0	41	26358245	0.000155549	121	28730741	0.000421152	201	26223346	0.000766493	277	26962296	0.00102736	187	21374961	0.000874855	137	20608942	0.00066476	181	20367957	0.000888651	112
K00332 NADH-quinone oxidoreductase subunit C [EC:7.1.1.2]	0.0251657	0.00175598	0.0216483	0.00143229	0.00115503	0.016061	0.00351735	0.0016734	0.00536131	10362	38517452	0.0269021	7608	28642163	0.0265622	6958	26103837	0.0266551	6814	27161364	0.0250871	6149	22945505	0.0267983	5388	22183832	0.024288	5946	26358245	0.0225584	6457	28730741	0.0224742	5940	26223346	0.0226516	6175	26962296	0.0229024	4329	21374961	0.0202527	4401	20608942	0.0213548	3924	20367957	0.0192656	3692
K02121 V/A-type H+/Na+-transporting ATPase subunit E	0.00359538	0.000840922	0.00583203	0.00114776	0.00115235	0.0160632	-0.00223665	-0.00339999	-0.0010733	937	38517452	0.00243266	736	28642163	0.00256964	872	26103837	0.00334051	862	27161364	0.00317363	850	22945505	0.00370443	895	22183832	0.00403447	1318	26358245	0.00500033	1295	28730741	0.00450737	1740	26223346	0.00663531	1736	26962296	0.00643862	1499	21374961	0.00701288	1496	20608942	0.00725898	1107	20367957	0.00543501	1014
K19286 FMN reductase [NAD(P)H] [EC:1.5.1.39]	0.00735787	0.00102205	0.00969186	0.00112315	0.00117532	0.016066	-0.00233399	-0.00356605	-0.00110193	3570	38517452	0.00926853	2208	28642163	0.00770892	1477	26103837	0.00565817	1683	27161364	0.0061963	1628	22945505	0.00709507	1723	22183832	0.00776692	2013	26358245	0.00763708	2164	28730741	0.007532	2753	26223346	0.0104983	3039	26962296	0.0112713	2216	21374961	0.0103673	1840	20608942	0.00892816	2076	20367957	0.0101925	1774
K03978 GTP-binding protein	0.00657436	0.00098033	0.00473522	0.000519664	0.00117681	0.0160669	0.00183914	0.000912352	0.00276592	2374	38517452	0.00616344	1822	28642163	0.00636125	2231	26103837	0.00854664	2048	27161364	0.00754012	1576	22945505	0.00686845	1242	22183832	0.00559867	1419	26358245	0.00538351	1762	28730741	0.0061328	1109	26223346	0.00422906	1080	26962296	0.00400559	1026	21374961	0.00480001	883	20608942	0.00428455	1118	20367957	0.00548901	829
K18300 outer membrane protein, multidrug efflux system	0.00823353	0.0029813	0.0144622	0.00273361	0.0011547	0.0160761	-0.00622862	-0.00950989	-0.00294735	1962	38517452	0.00509379	1461	28642163	0.00510087	1851	26103837	0.00709091	1884	27161364	0.00693632	1761	22945505	0.00767471	1732	22183832	0.00780749	3268	26358245	0.0123984	3955	28730741	0.0137657	4238	26223346	0.0161612	4495	26962296	0.0166714	3455	21374961	0.0161638	3536	20608942	0.0171576	2072	20367957	0.0101728	1751
K06195 ApaG protein	0.0019775	0.000713847	0.000632805	0.00028847	0.00117333	0.0160777	0.0013447	0.000688852	0.00200054	665	38517452	0.00172649	546	28642163	0.00190628	865	26103837	0.00331369	772	27161364	0.00284227	498	22945505	0.00217036	278	22183832	0.00125316	358	26358245	0.00135821	359	28730741	0.00124953	71	26223346	0.000270751	88	26962296	0.000326382	83	21374961	0.000388305	112	20608942	0.000543453	211	20367957	0.00103594	120
K19710 ATP adenylyltransferase [EC:2.7.7.53]	0.0211678	0.00119212	0.0236755	0.00111644	0.00117482	0.0160787	-0.00250766	-0.00383222	-0.00118311	8848	38517452	0.0229714	6282	28642163	0.0219327	5321	26103837	0.020384	5450	27161364	0.0200653	4468	22945505	0.0194722	4898	22183832	0.0220791	5330	26358245	0.0202214	6383	28730741	0.0222166	5960	26223346	0.0227278	6140	26962296	0.0227725	5433	21374961	0.0254176	4882	20608942	0.0236887	5071	20367957	0.0248969	4461
K08660 cytosolic nonspecific dipeptidase [EC:3.4.13.18]	0.00125481	0.00046927	0.000368416	0.000178269	0.00117296	0.0160922	0.000886394	0.000457033	0.00131576	375	38517452	0.000973585	370	28642163	0.0012918	535	26103837	0.00204951	387	27161364	0.00142482	369	22945505	0.00160816	195	22183832	0.000879019	372	26358245	0.00141132	115	28730741	0.000400268	79	26223346	0.000301258	61	26962296	0.000226242	44	21374961	0.000205848	56	20608942	0.000271727	120	20367957	0.000589161	42
K05794 tellurite resistance protein TerC	0.0205286	0.00478849	0.0112344	0.000990897	0.00118619	0.0161364	0.00929416	0.00499262	0.0135957	8513	38517452	0.0221017	6760	28642163	0.0236016	6965	26103837	0.0266819	7167	27161364	0.0263867	4572	22945505	0.0199255	3804	22183832	0.0171476	4242	26358245	0.0160936	3531	28730741	0.01229	3325	26223346	0.0126795	3342	26962296	0.0123951	2469	21374961	0.0115509	2480	20608942	0.0120336	2138	20367957	0.0104969	1797
K09937 uncharacterized protein	0.000981239	0.000255127	0.000455094	0.000228557	0.001188	0.0161417	0.000526145	0.000248158	0.000804132	293	38517452	0.000760694	289	28642163	0.001009	353	26103837	0.00135229	350	27161364	0.0012886	241	22945505	0.00105031	205	22183832	0.000924096	132	26358245	0.000500792	277	28730741	0.000964124	73	26223346	0.000278378	85	26962296	0.000315255	78	21374961	0.000364913	81	20608942	0.000393033	52	20367957	0.000255303	63
K13889 glutathione transport system substrate-binding protein	0.00328712	0.000888389	0.00500154	0.000631866	0.00118567	0.0161488	-0.00171442	-0.00260719	-0.000821649	1141	38517452	0.00296229	820	28642163	0.00286291	603	26103837	0.00231001	537	27161364	0.00197707	742	22945505	0.00323375	1005	22183832	0.00453033	1170	26358245	0.00443884	1144	28730741	0.0039818	1415	26223346	0.00539596	1287	26962296	0.00477333	1114	21374961	0.00521171	1176	20608942	0.00570626	1135	20367957	0.00557248	965
K01479 formiminoglutamase [EC:3.5.3.8]	0.00134063	0.000482979	0.000435158	0.000263482	0.0011901	0.0161507	0.00090547	0.000446892	0.00136405	372	38517452	0.000965796	223	28642163	0.000778572	462	26103837	0.00176985	468	27161364	0.00172304	476	22945505	0.00207448	320	22183832	0.00144249	358	26358245	0.00135821	176	28730741	0.000612584	36	26223346	0.000137282	60	26962296	0.000222533	42	21374961	0.000196492	29	20608942	0.000140716	137	20367957	0.000672625	136
K00791 tRNA dimethylallyltransferase [EC:2.5.1.75]	0.0468562	0.00252882	0.0516172	0.00150205	0.00119493	0.0161774	-0.00476102	-0.0071976	-0.00232444	17611	38517452	0.0457221	12912	28642163	0.0450804	11351	26103837	0.043484	12384	27161364	0.0455942	10928	22945505	0.0476259	10533	22183832	0.0474805	12467	26358245	0.0472983	15102	28730741	0.0525639	13227	26223346	0.0504398	13734	26962296	0.0509378	11706	21374961	0.054765	10176	20608942	0.0493766	10605	20367957	0.0520671	9299
K00493 unspecific monooxygenase [EC:1.14.14.1]	0.00602897	0.00247869	0.00138774	0.00111338	0.00119424	0.0161874	0.00464123	0.0023437	0.00693875	765	38517452	0.00198611	634	28642163	0.00221352	1990	26103837	0.0076234	2199	27161364	0.00809606	1879	22945505	0.00818897	1307	22183832	0.00589168	2266	26358245	0.00859693	1619	28730741	0.00563508	199	26223346	0.000758866	289	26962296	0.00107187	58	21374961	0.000271346	72	20608942	0.000349363	242	20367957	0.00118814	243
K10211 4,4'-diaponeurosporenoate glycosyltransferase [EC:2.4.1.-]	0.00729951	0.00174824	0.00354291	0.00172592	0.00120358	0.0162361	0.0037566	0.00176507	0.00574812	3095	38517452	0.00803532	2470	28642163	0.00862365	1714	26103837	0.00656608	2304	27161364	0.00848264	1972	22945505	0.00859428	1964	22183832	0.00885329	1466	26358245	0.00556183	1057	28730741	0.00367899	424	26223346	0.00161688	649	26962296	0.00240707	496	21374961	0.00232047	665	20608942	0.00322675	1475	20367957	0.00724177	960
K00278 L-aspartate oxidase [EC:1.4.3.16]	0.0587124	0.00554917	0.0691472	0.00328233	0.00120279	0.0162449	-0.0104348	-0.0157773	-0.00509226	21636	38517452	0.0561719	17044	28642163	0.0595067	13825	26103837	0.0529616	15001	27161364	0.0552292	12863	22945505	0.0560589	12062	22183832	0.0543729	17363	26358245	0.0658731	19975	28730741	0.0695248	18493	26223346	0.0705211	18862	26962296	0.069957	14900	21374961	0.0697077	14696	20608942	0.0713089	12573	20367957	0.0617293	12031
K15372 taurine---2-oxoglutarate transaminase [EC:2.6.1.55]	0.0178491	0.00288235	0.0123424	0.00196077	0.0012057	0.0162454	0.0055067	0.00264454	0.00836887	8228	38517452	0.0213617	6280	28642163	0.0219257	4281	26103837	0.0163999	4333	27161364	0.0159528	4460	22945505	0.0194374	4091	22183832	0.0184414	4395	26358245	0.0166741	3620	28730741	0.0125997	3002	26223346	0.0114478	3006	26962296	0.0111489	2218	21374961	0.0103766	1982	20608942	0.00961718	2930	20367957	0.0143853	2849
K21003 polysaccharide biosynthesis protein PslJ	0.000415046	0.000184963	6.04677e-05	4.8629e-05	0.00120184	0.0162515	0.000354579	0.000187754	0.000521403	185	38517452	0.000480302	101	28642163	0.000352627	146	26103837	0.000559305	172	27161364	0.000633252	118	22945505	0.000514262	105	22183832	0.000473318	81	26358245	0.000307304	0	28730741	0	6	26223346	2.28804e-05	31	26962296	0.000114975	5	21374961	2.33919e-05	10	20608942	4.85226e-05	32	20367957	0.00015711	11
K00387 sulfite oxidase [EC:1.8.3.1]	0.00767339	0.00133919	0.00515103	0.000819213	0.00121348	0.0163306	0.00252235	0.00122451	0.00382019	3330	38517452	0.00864543	2329	28642163	0.00813137	2199	26103837	0.00842405	1839	27161364	0.00677065	2146	22945505	0.00935259	1846	22183832	0.00832138	1816	26358245	0.00688968	1394	28730741	0.00485195	1309	26223346	0.00499174	1625	26962296	0.00602693	953	21374961	0.00445849	711	20608942	0.00344996	1162	20367957	0.00570504	1094
K03430 2-aminoethylphosphonate-pyruvate transaminase [EC:2.6.1.37]	0.00395883	0.00101255	0.00204418	0.000649111	0.00122339	0.0163665	0.00191465	0.000923457	0.00290585	1269	38517452	0.00329461	1060	28642163	0.00370084	1308	26103837	0.00501076	1432	27161364	0.00527219	1038	22945505	0.00452376	991	22183832	0.00446722	909	26358245	0.00344864	561	28730741	0.00195261	307	26223346	0.00117071	314	26962296	0.00116459	438	21374961	0.00204913	423	20608942	0.00205251	604	20367957	0.00296544	540
K01965 propionyl-CoA carboxylase alpha chain [EC:6.4.1.3]	0.014687	0.00179439	0.00824803	0.00345438	0.00122797	0.0163696	0.00643896	0.00318263	0.00969528	4804	38517452	0.0124723	3361	28642163	0.0117344	4201	26103837	0.0160934	4592	27161364	0.0169064	3636	22945505	0.0158462	2961	22183832	0.0133476	4244	26358245	0.0161012	4308	28730741	0.0149944	1617	26223346	0.00616626	1738	26962296	0.00644604	934	21374961	0.0043696	970	20608942	0.00470669	1881	20367957	0.00923509	1398
[truncated: 1,152 more rows]
[truncated: 8 more columns]
