# Supplementary material for: Lake microbiome and trophy fluctuations of the ancient hemp rettery
Source: Sci Rep. 2022 May 25;12:8846. doi: 10.1038/s41598-022-12761-w (PMC9132974; doi:10.1038/s41598-022-12761-w)
Supplement: Supplementary file 6 — Dataset S5. [file 41598_2022_12761_MOESM6_ESM.xlsx]

## Sheet: nHR
KEGG Level 2	Pathway	Naive reconstruction	minPath reconstrucion	KO in pathway	KO found
09101 Carbohydrate metabolism	00010 Glycolysis / Gluconeogenesis	1	1	105	12
09101 Carbohydrate metabolism	00020 Citrate cycle (TCA cycle)	1	0	62	13
09101 Carbohydrate metabolism	00030 Pentose phosphate pathway	1	1	84	10
09101 Carbohydrate metabolism	00040 Pentose and glucuronate interconversions	1	1	85	4
09101 Carbohydrate metabolism	00051 Fructose and mannose metabolism	1	1	111	6
09101 Carbohydrate metabolism	00052 Galactose metabolism	1	1	77	3
09101 Carbohydrate metabolism	00053 Ascorbate and aldarate metabolism	1	1	61	4
09103 Lipid metabolism	00062 Fatty acid elongation	1	0	24	1
09103 Lipid metabolism	00071 Fatty acid degradation	1	1	58	12
09103 Lipid metabolism	00072 Synthesis and degradation of ketone bodies	1	0	8	1
09103 Lipid metabolism	00120 Primary bile acid biosynthesis	1	0	18	4
09103 Lipid metabolism	00121 Secondary bile acid biosynthesis	1	1	15	2
09108 Metabolism of cofactors and vitamins	00130 Ubiquinone and other terpenoid-quinone biosynthesis	1	1	59	6
09103 Lipid metabolism	00140 Steroid hormone biosynthesis	1	1	46	1
09102 Energy metabolism	00190 Oxidative phosphorylation	1	1	218	36
09102 Energy metabolism	00195 Photosynthesis	1	1	63	1
09105 Amino acid metabolism	00220 Arginine biosynthesis	1	1	59	8
09104 Nucleotide metabolism	00230 Purine metabolism	1	1	213	18
09104 Nucleotide metabolism	00240 Pyrimidine metabolism	1	1	102	9
09105 Amino acid metabolism	00250 Alanine, aspartate and glutamate metabolism	1	1	70	8
09105 Amino acid metabolism	00260 Glycine, serine and threonine metabolism	1	1	99	25
09110 Biosynthesis of other secondary metabolites	00261 Monobactam biosynthesis	1	1	28	2
09105 Amino acid metabolism	00270 Cysteine and methionine metabolism	1	1	117	11
09105 Amino acid metabolism	00280 Valine, leucine and isoleucine degradation	1	1	70	19
09109 Metabolism of terpenoids and polyketides	00281 Geraniol degradation	1	1	16	6
09105 Amino acid metabolism	00290 Valine, leucine and isoleucine biosynthesis	1	0	19	1
09105 Amino acid metabolism	00300 Lysine biosynthesis	1	1	47	2
09105 Amino acid metabolism	00310 Lysine degradation	1	1	89	8
09105 Amino acid metabolism	00330 Arginine and proline metabolism	1	1	112	15
09110 Biosynthesis of other secondary metabolites	00332 Carbapenem biosynthesis	1	1	19	1
09110 Biosynthesis of other secondary metabolites	00333 Prodigiosin biosynthesis	1	1	20	1
09105 Amino acid metabolism	00340 Histidine metabolism	1	1	47	9
09105 Amino acid metabolism	00350 Tyrosine metabolism	1	1	81	11
09105 Amino acid metabolism	00360 Phenylalanine metabolism	1	1	77	18
09111 Xenobiotics biodegradation and metabolism	00361 Chlorocyclohexane and chlorobenzene degradation	1	1	41	5
09111 Xenobiotics biodegradation and metabolism	00362 Benzoate degradation	1	1	106	28
09111 Xenobiotics biodegradation and metabolism	00363 Bisphenol degradation	1	1	2	1
09111 Xenobiotics biodegradation and metabolism	00364 Fluorobenzoate degradation	1	0	18	5
09105 Amino acid metabolism	00380 Tryptophan metabolism	1	1	80	15
09105 Amino acid metabolism	00400 Phenylalanine, tyrosine and tryptophan biosynthesis	1	1	71	4
09110 Biosynthesis of other secondary metabolites	00401 Novobiocin biosynthesis	1	0	30	1
09110 Biosynthesis of other secondary metabolites	00405 Phenazine biosynthesis	1	0	16	1
09106 Metabolism of other amino acids	00410 beta-Alanine metabolism	1	0	44	11
09106 Metabolism of other amino acids	00430 Taurine and hypotaurine metabolism	1	1	24	5
09106 Metabolism of other amino acids	00440 Phosphonate and phosphinate metabolism	1	1	43	11
09106 Metabolism of other amino acids	00450 Selenocompound metabolism	1	1	33	4
09106 Metabolism of other amino acids	00460 Cyanoamino acid metabolism	1	1	36	4
09106 Metabolism of other amino acids	00471 D-Glutamine and D-glutamate metabolism	1	1	10	2
09106 Metabolism of other amino acids	00472 D-Arginine and D-ornithine metabolism	1	1	9	3
09106 Metabolism of other amino acids	00473 D-Alanine metabolism	1	0	6	1
09106 Metabolism of other amino acids	00480 Glutathione metabolism	1	1	56	10
09101 Carbohydrate metabolism	00500 Starch and sucrose metabolism	1	1	105	5
09107 Glycan biosynthesis and metabolism	00510 N-Glycan biosynthesis	1	1	45	1
09107 Glycan biosynthesis and metabolism	00513 Various types of N-glycan biosynthesis	1	0	52	1
09107 Glycan biosynthesis and metabolism	00514 Other types of O-glycan biosynthesis	1	0	31	1
09101 Carbohydrate metabolism	00520 Amino sugar and nucleotide sugar metabolism	1	1	147	6
09109 Metabolism of terpenoids and polyketides	00523 Polyketide sugar unit biosynthesis	1	1	59	2
09107 Glycan biosynthesis and metabolism	00531 Glycosaminoglycan degradation	1	1	15	1
09107 Glycan biosynthesis and metabolism	00534 Glycosaminoglycan biosynthesis - heparan sulfate / heparin	1	1	22	1
09107 Glycan biosynthesis and metabolism	00540 Lipopolysaccharide biosynthesis	1	1	62	6
09107 Glycan biosynthesis and metabolism	00541 O-Antigen nucleotide sugar biosynthesis	1	0	96	3
09107 Glycan biosynthesis and metabolism	00550 Peptidoglycan biosynthesis	1	1	51	5
09103 Lipid metabolism	00561 Glycerolipid metabolism	1	1	90	13
09101 Carbohydrate metabolism	00562 Inositol phosphate metabolism	1	0	76	1
09103 Lipid metabolism	00564 Glycerophospholipid metabolism	1	1	113	16
09107 Glycan biosynthesis and metabolism	00571 Lipoarabinomannan (LAM) biosynthesis	1	1	14	2
09103 Lipid metabolism	00590 Arachidonic acid metabolism	1	1	45	3
09103 Lipid metabolism	00592 alpha-Linolenic acid metabolism	1	0	25	1
09103 Lipid metabolism	00600 Sphingolipid metabolism	1	1	47	2
09101 Carbohydrate metabolism	00620 Pyruvate metabolism	1	1	126	21
09111 Xenobiotics biodegradation and metabolism	00621 Dioxin degradation	1	0	31	1
09111 Xenobiotics biodegradation and metabolism	00622 Xylene degradation	1	0	34	4
09111 Xenobiotics biodegradation and metabolism	00623 Toluene degradation	1	0	46	2
09111 Xenobiotics biodegradation and metabolism	00624 Polycyclic aromatic hydrocarbon degradation	1	0	43	2
09111 Xenobiotics biodegradation and metabolism	00625 Chloroalkane and chloroalkene degradation	1	1	43	5
09111 Xenobiotics biodegradation and metabolism	00626 Naphthalene degradation	1	1	29	2
09111 Xenobiotics biodegradation and metabolism	00627 Aminobenzoate degradation	1	1	81	14
09101 Carbohydrate metabolism	00630 Glyoxylate and dicarboxylate metabolism	1	1	100	21
09111 Xenobiotics biodegradation and metabolism	00633 Nitrotoluene degradation	1	1	22	1
09101 Carbohydrate metabolism	00640 Propanoate metabolism	1	1	110	17
09111 Xenobiotics biodegradation and metabolism	00642 Ethylbenzene degradation	1	0	16	1
09111 Xenobiotics biodegradation and metabolism	00643 Styrene degradation	1	0	25	11
09101 Carbohydrate metabolism	00650 Butanoate metabolism	1	1	99	18
09101 Carbohydrate metabolism	00660 C5-Branched dibasic acid metabolism	1	1	29	3
09108 Metabolism of cofactors and vitamins	00670 One carbon pool by folate	1	0	37	3
09102 Energy metabolism	00680 Methane metabolism	1	1	190	20
09102 Energy metabolism	00710 Carbon fixation in photosynthetic organisms	1	0	36	6
09102 Energy metabolism	00720 Carbon fixation pathways in prokaryotes	1	1	106	13
09108 Metabolism of cofactors and vitamins	00740 Riboflavin metabolism	1	1	49	2
09108 Metabolism of cofactors and vitamins	00750 Vitamin B6 metabolism	1	1	24	4
09108 Metabolism of cofactors and vitamins	00760 Nicotinate and nicotinamide metabolism	1	1	97	11
09108 Metabolism of cofactors and vitamins	00770 Pantothenate and CoA biosynthesis	1	0	44	1
09108 Metabolism of cofactors and vitamins	00780 Biotin metabolism	1	1	23	1
09108 Metabolism of cofactors and vitamins	00785 Lipoic acid metabolism	1	1	13	2
09108 Metabolism of cofactors and vitamins	00790 Folate biosynthesis	1	1	82	5
09111 Xenobiotics biodegradation and metabolism	00791 Atrazine degradation	1	0	16	3
09108 Metabolism of cofactors and vitamins	00830 Retinol metabolism	1	1	50	5
09108 Metabolism of cofactors and vitamins	00860 Porphyrin and chlorophyll metabolism	1	1	131	17
09109 Metabolism of terpenoids and polyketides	00902 Monoterpenoid biosynthesis	1	1	41	2
09109 Metabolism of terpenoids and polyketides	00903 Limonene and pinene degradation	1	1	12	5
09109 Metabolism of terpenoids and polyketides	00906 Carotenoid biosynthesis	1	1	52	8
09109 Metabolism of terpenoids and polyketides	00908 Zeatin biosynthesis	1	1	10	1
09102 Energy metabolism	00910 Nitrogen metabolism	1	1	65	12
09102 Energy metabolism	00920 Sulfur metabolism	1	1	109	26
09111 Xenobiotics biodegradation and metabolism	00930 Caprolactam degradation	1	1	22	6
09110 Biosynthesis of other secondary metabolites	00940 Phenylpropanoid biosynthesis	1	0	38	1
09110 Biosynthesis of other secondary metabolites	00950 Isoquinoline alkaloid biosynthesis	1	0	62	2
09110 Biosynthesis of other secondary metabolites	00960 Tropane, piperidine and pyridine alkaloid biosynthesis	1	0	26	1
09122 Translation	00970 Aminoacyl-tRNA biosynthesis	1	1	66	2
09111 Xenobiotics biodegradation and metabolism	00980 Metabolism of xenobiotics by cytochrome P450	1	0	34	4
09109 Metabolism of terpenoids and polyketides	00981 Insect hormone biosynthesis	1	1	18	2
09111 Xenobiotics biodegradation and metabolism	00982 Drug metabolism - cytochrome P450	1	0	25	4
09111 Xenobiotics biodegradation and metabolism	00983 Drug metabolism - other enzymes	1	1	32	5
09111 Xenobiotics biodegradation and metabolism	00984 Steroid degradation	1	1	15	9
09110 Biosynthesis of other secondary metabolites	00997 Biosynthesis of various secondary metabolites - part 3	1	1	33	1
09103 Lipid metabolism	01040 Biosynthesis of unsaturated fatty acids	1	0	32	3
09109 Metabolism of terpenoids and polyketides	01051 Biosynthesis of ansamycins	1	1	32	1
09109 Metabolism of terpenoids and polyketides	01052 Type I polyketide structures	1	1	126	2
09109 Metabolism of terpenoids and polyketides	01053 Biosynthesis of siderophore group nonribosomal peptides	1	1	37	3
09109 Metabolism of terpenoids and polyketides	01055 Biosynthesis of vancomycin group antibiotics	1	1	29	3
09109 Metabolism of terpenoids and polyketides	01057 Biosynthesis of type II polyketide products	1	1	72	1
09109 Metabolism of terpenoids and polyketides	01059 Biosynthesis of enediyne antibiotics	1	1	73	2
09175 Drug resistance: antimicrobial	01501 beta-Lactam resistance	1	1	112	6
09175 Drug resistance: antimicrobial	01502 Vancomycin resistance	1	0	22	1
09175 Drug resistance: antimicrobial	01503 Cationic antimicrobial peptide (CAMP) resistance	1	1	54	7
09176 Drug resistance: antineoplastic	01524 Platinum drug resistance	1	0	46	1
09131 Membrane transport	02010 ABC transporters	1	1	512	56
09132 Signal transduction	02020 Two-component system	1	1	495	61
09145 Cellular community - prokaryotes	02024 Quorum sensing	1	1	282	19
09145 Cellular community - prokaryotes	02025 Biofilm formation - Pseudomonas aeruginosa	1	1	90	16
09145 Cellular community - prokaryotes	02026 Biofilm formation - Escherichia coli	1	1	61	6
09142 Cell motility	02030 Bacterial chemotaxis	1	1	26	1
09142 Cell motility	02040 Flagellar assembly	1	1	55	4
09131 Membrane transport	02060 Phosphotransferase system (PTS)	1	1	71	2
09122 Translation	03008 Ribosome biogenesis in eukaryotes	1	1	82	3
09122 Translation	03010 Ribosome	1	1	143	1
09122 Translation	03013 RNA transport	1	1	142	3
09122 Translation	03015 mRNA surveillance pathway	1	0	63	2
09123 Folding, sorting and degradation	03018 RNA degradation	1	1	79	7
09121 Transcription	03040 Spliceosome	1	1	123	2
09123 Folding, sorting and degradation	03050 Proteasome	1	1	49	4
09123 Folding, sorting and degradation	03060 Protein export	1	0	39	2
09131 Membrane transport	03070 Bacterial secretion system	1	1	74	13
09152 Endocrine system	03320 PPAR signaling pathway	1	1	63	4
09124 Replication and repair	03410 Base excision repair	1	1	43	6
09124 Replication and repair	03440 Homologous recombination	1	1	72	2
09132 Signal transduction	04020 Calcium signaling pathway	1	1	185	1
09132 Signal transduction	04022 cGMP-PKG signaling pathway	1	0	121	1
09132 Signal transduction	04024 cAMP signaling pathway	1	0	163	1
09132 Signal transduction	04070 Phosphatidylinositol signaling system	1	0	55	1
09132 Signal transduction	04071 Sphingolipid signaling pathway	1	0	82	1
09132 Signal transduction	04072 Phospholipase D signaling pathway	1	0	108	3
09143 Cell growth and death	04110 Cell cycle	1	0	110	1
09143 Cell growth and death	04111 Cell cycle - yeast	1	0	126	1
09143 Cell growth and death	04112 Cell cycle - Caulobacter	1	1	31	2
09143 Cell growth and death	04113 Meiosis - yeast	1	0	103	3
09143 Cell growth and death	04114 Oocyte meiosis	1	0	79	2
09143 Cell growth and death	04115 p53 signaling pathway	1	1	67	1
09123 Folding, sorting and degradation	04120 Ubiquitin mediated proteolysis	1	1	131	3
09123 Folding, sorting and degradation	04122 Sulfur relay system	1	1	29	3
09141 Transport and catabolism	04137 Mitophagy - animal	1	1	60	1
09141 Transport and catabolism	04138 Autophagy - yeast	1	1	82	1
09123 Folding, sorting and degradation	04141 Protein processing in endoplasmic reticulum	1	0	144	1
09141 Transport and catabolism	04142 Lysosome	1	0	105	1
09141 Transport and catabolism	04146 Peroxisome	1	1	73	7
09132 Signal transduction	04151 PI3K-Akt signaling pathway	1	1	263	1
09132 Signal transduction	04152 AMPK signaling pathway	1	0	84	3
09149 Aging	04212 Longevity regulating pathway - worm	1	0	57	3
09149 Aging	04213 Longevity regulating pathway - multiple species	1	0	58	1
09143 Cell growth and death	04217 Necroptosis	1	0	97	1
09143 Cell growth and death	04218 Cellular senescence	1	0	117	1
09153 Circulatory system	04260 Cardiac muscle contraction	1	0	67	2
09153 Circulatory system	04261 Adrenergic signaling in cardiomyocytes	1	0	95	1
09153 Circulatory system	04270 Vascular smooth muscle contraction	1	0	95	1
09158 Development and regeneration	04361 Axon regeneration	1	0	59	1
09132 Signal transduction	04390 Hippo signaling pathway	1	0	115	1
09132 Signal transduction	04391 Hippo signaling pathway - fly	1	1	53	1
09132 Signal transduction	04392 Hippo signaling pathway - multiple species	1	0	25	1
09144 Cellular community - eukaryotes	04510 Focal adhesion	1	0	149	2
09133 Signaling molecules and interaction	04512 ECM-receptor interaction	1	0	65	1
09151 Immune system	04611 Platelet activation	1	0	90	1
09151 Immune system	04612 Antigen processing and presentation	1	1	46	1
09151 Immune system	04613 Neutrophil extracellular trap formation	1	0	90	1
09152 Endocrine system	04614 Renin-angiotensin system	1	0	22	1
09159 Environmental adaptation	04626 Plant-pathogen interaction	1	1	86	2
09151 Immune system	04640 Hematopoietic cell lineage	1	0	80	2
09132 Signal transduction	04668 TNF signaling pathway	1	0	92	1
09159 Environmental adaptation	04714 Thermogenesis	1	1	188	6
09156 Nervous system	04720 Long-term potentiation	1	0	43	1
09156 Nervous system	04723 Retrograde endocannabinoid signaling	1	1	119	1
09156 Nervous system	04724 Glutamatergic synapse	1	0	88	1
09156 Nervous system	04725 Cholinergic synapse	1	1	90	1
09156 Nervous system	04726 Serotonergic synapse	1	0	85	1
09156 Nervous system	04727 GABAergic synapse	1	0	69	2
09156 Nervous system	04728 Dopaminergic synapse	1	0	84	2
09157 Sensory system	04750 Inflammatory mediator regulation of TRP channels	1	0	68	1
09142 Cell motility	04810 Regulation of actin cytoskeleton	1	0	163	2
09152 Endocrine system	04910 Insulin signaling pathway	1	0	88	3
09152 Endocrine system	04914 Progesterone-mediated oocyte maturation	1	0	64	1
09152 Endocrine system	04918 Thyroid hormone synthesis	1	0	53	1
09152 Endocrine system	04921 Oxytocin signaling pathway	1	0	112	1
09152 Endocrine system	04922 Glucagon signaling pathway	1	0	57	3
09167 Endocrine and metabolic disease	04931 Insulin resistance	1	1	74	2
09167 Endocrine and metabolic disease	04932 Non-alcoholic fatty liver disease	1	0	125	2
09167 Endocrine and metabolic disease	04934 Cushing syndrome	1	0	122	1
09155 Excretory system	04964 Proximal tubule bicarbonate reclamation	1	0	14	1
09154 Digestive system	04970 Salivary secretion	1	0	64	1
09154 Digestive system	04972 Pancreatic secretion	1	0	69	1
09154 Digestive system	04973 Carbohydrate digestion and absorption	1	0	22	1
09154 Digestive system	04975 Fat digestion and absorption	1	0	28	2
09154 Digestive system	04978 Mineral absorption	1	1	36	1
09164 Neurodegenerative disease	05010 Alzheimer disease	1	0	287	4
09164 Neurodegenerative disease	05012 Parkinson disease	1	0	194	4
09164 Neurodegenerative disease	05014 Amyotrophic lateral sclerosis	1	0	280	4
09164 Neurodegenerative disease	05016 Huntington disease	1	0	229	4
09164 Neurodegenerative disease	05017 Spinocerebellar ataxia	1	0	116	1
09164 Neurodegenerative disease	05020 Prion disease	1	0	209	3
09164 Neurodegenerative disease	05022 Pathways of neurodegeneration - multiple diseases	1	0	368	5
09165 Substance dependence	05030 Cocaine addiction	1	0	39	1
09165 Substance dependence	05031 Amphetamine addiction	1	0	46	2
09165 Substance dependence	05034 Alcoholism	1	0	86	3
09145 Cellular community - prokaryotes	05111 Biofilm formation - Vibrio cholerae	1	1	106	12
09171 Infectious disease: bacterial	05120 Epithelial cell signaling in Helicobacter pylori infection	1	0	91	1
09171 Infectious disease: bacterial	05133 Pertussis	1	0	79	3
09171 Infectious disease: bacterial	05150 Staphylococcus aureus infection	1	0	74	1
09172 Infectious disease: viral	05165 Human papillomavirus infection	1	0	231	2
09172 Infectious disease: viral	05166 Human T-cell leukemia virus 1 infection	1	0	184	1
09172 Infectious disease: viral	05168 Herpes simplex virus 1 infection	1	0	148	1
09172 Infectious disease: viral	05169 Epstein-Barr virus infection	1	0	172	1
09161 Cancer: overview	05200 Pathways in cancer	1	0	417	3
09161 Cancer: overview	05203 Viral carcinogenesis	1	1	174	2
09161 Cancer: overview	05204 Chemical carcinogenesis	1	0	38	3
09161 Cancer: overview	05205 Proteoglycans in cancer	1	0	165	1
09161 Cancer: overview	05206 MicroRNAs in cancer	1	0	245	1
09162 Cancer: specific types	05211 Renal cell carcinoma	1	0	56	1
09162 Cancer: specific types	05219 Bladder cancer	1	0	38	1
09162 Cancer: specific types	05222 Small cell lung cancer	1	0	74	1
09162 Cancer: specific types	05225 Hepatocellular carcinoma	1	0	116	1
09161 Cancer: overview	05230 Central carbon metabolism in cancer	1	0	49	3
09161 Cancer: overview	05231 Choline metabolism in cancer	1	0	61	2
09166 Cardiovascular disease	05410 Hypertrophic cardiomyopathy	1	0	79	1
09166 Cardiovascular disease	05412 Arrhythmogenic right ventricular cardiomyopathy	1	0	68	1
09166 Cardiovascular disease	05414 Dilated cardiomyopathy	1	0	87	1
09166 Cardiovascular disease	05415 Diabetic cardiomyopathy	1	0	160	3
09166 Cardiovascular disease	05418 Fluid shear stress and atherosclerosis	1	0	99	1

## Sheet: HR
KEGG Level 2	Pathway	Naive reconstruction	minPath reconstrucion	KO in pathway	KO found
09101 Carbohydrate metabolism	00010 Glycolysis / Gluconeogenesis	1	0	105	12
09101 Carbohydrate metabolism	00020 Citrate cycle (TCA cycle)	1	1	62	4
09101 Carbohydrate metabolism	00030 Pentose phosphate pathway	1	1	84	10
09101 Carbohydrate metabolism	00040 Pentose and glucuronate interconversions	1	1	85	16
09101 Carbohydrate metabolism	00051 Fructose and mannose metabolism	1	1	111	15
09101 Carbohydrate metabolism	00052 Galactose metabolism	1	1	77	6
09101 Carbohydrate metabolism	00053 Ascorbate and aldarate metabolism	1	0	61	3
09103 Lipid metabolism	00061 Fatty acid biosynthesis	1	0	39	1
09103 Lipid metabolism	00072 Synthesis and degradation of ketone bodies	1	1	8 f	n
09108 Metabolism of cofactors and vitamins	00130 Ubiquinone and other terpenoid-quinone biosynthesis	1	1	59	1
09102 Energy metabolism	00190 Oxidative phosphorylation	1	1	218	6
09102 Energy metabolism	00195 Photosynthesis	1	0	63	3
09105 Amino acid metabolism	00220 Arginine biosynthesis	1	1	59	10
09104 Nucleotide metabolism	00230 Purine metabolism	1	1	213	24
09104 Nucleotide metabolism	00240 Pyrimidine metabolism	1	1	102	19
09105 Amino acid metabolism	00250 Alanine, aspartate and glutamate metabolism	1	1	70	12
09105 Amino acid metabolism	00260 Glycine, serine and threonine metabolism	1	1	99	11
09110 Biosynthesis of other secondary metabolites	00261 Monobactam biosynthesis	1	0	28	4
09105 Amino acid metabolism	00270 Cysteine and methionine metabolism	1	1	117	6
09105 Amino acid metabolism	00280 Valine, leucine and isoleucine degradation	1	0	70	1
09105 Amino acid metabolism	00290 Valine, leucine and isoleucine biosynthesis	1	0	19	5
09105 Amino acid metabolism	00300 Lysine biosynthesis	1	1	47	10
09105 Amino acid metabolism	00330 Arginine and proline metabolism	1	1	112	3
09110 Biosynthesis of other secondary metabolites	00332 Carbapenem biosynthesis	1	0	19	1
09110 Biosynthesis of other secondary metabolites	00333 Prodigiosin biosynthesis	1	1	20	1
09105 Amino acid metabolism	00340 Histidine metabolism	1	1	47	6
09105 Amino acid metabolism	00350 Tyrosine metabolism	1	0	81	1
09105 Amino acid metabolism	00360 Phenylalanine metabolism	1	1	77	3
09105 Amino acid metabolism	00380 Tryptophan metabolism	1	0	80	1
09105 Amino acid metabolism	00400 Phenylalanine, tyrosine and tryptophan biosynthesis	1	1	71	15
09110 Biosynthesis of other secondary metabolites	00401 Novobiocin biosynthesis	1	0	30	1
09110 Biosynthesis of other secondary metabolites	00405 Phenazine biosynthesis	1	0	16	2
09106 Metabolism of other amino acids	00410 beta-Alanine metabolism	1	0	44	1
09106 Metabolism of other amino acids	00430 Taurine and hypotaurine metabolism	1	0	24	1
09106 Metabolism of other amino acids	00450 Selenocompound metabolism	1	1	33	2
09106 Metabolism of other amino acids	00460 Cyanoamino acid metabolism	1	0	36	3
09106 Metabolism of other amino acids	00473 D-Alanine metabolism	1	1	6 f	n
09106 Metabolism of other amino acids	00480 Glutathione metabolism	1	0	56	2
09101 Carbohydrate metabolism	00500 Starch and sucrose metabolism	1	1	105	9
09107 Glycan biosynthesis and metabolism	00510 N-Glycan biosynthesis	1	1	45	3
09107 Glycan biosynthesis and metabolism	00511 Other glycan degradation	1	1	22	2
09107 Glycan biosynthesis and metabolism	00513 Various types of N-glycan biosynthesis	1	1	52	2
09101 Carbohydrate metabolism	00520 Amino sugar and nucleotide sugar metabolism	1	1	147	15
09110 Biosynthesis of other secondary metabolites	00521 Streptomycin biosynthesis	1	0	20	1
09109 Metabolism of terpenoids and polyketides	00523 Polyketide sugar unit biosynthesis	1	0	59	1
09107 Glycan biosynthesis and metabolism	00540 Lipopolysaccharide biosynthesis	1	1	62	4
09107 Glycan biosynthesis and metabolism	00541 O-Antigen nucleotide sugar biosynthesis	1	1	96	6
09107 Glycan biosynthesis and metabolism	00542 O-Antigen repeat unit biosynthesis	1	1	35	1
09107 Glycan biosynthesis and metabolism	00550 Peptidoglycan biosynthesis	1	0	51	2
09103 Lipid metabolism	00561 Glycerolipid metabolism	1	1	90	4
09101 Carbohydrate metabolism	00562 Inositol phosphate metabolism	1	1	76	5
09107 Glycan biosynthesis and metabolism	00563 Glycosylphosphatidylinositol (GPI)-anchor biosynthesis	1	1	27	1
09103 Lipid metabolism	00564 Glycerophospholipid metabolism	1	1	113	2
09103 Lipid metabolism	00600 Sphingolipid metabolism	1	0	47	1
09101 Carbohydrate metabolism	00620 Pyruvate metabolism	1	1	126	7
09111 Xenobiotics biodegradation and metabolism	00622 Xylene degradation	1	1	34	2
09111 Xenobiotics biodegradation and metabolism	00623 Toluene degradation	1	1	46	2
09111 Xenobiotics biodegradation and metabolism	00625 Chloroalkane and chloroalkene degradation	1	0	43	2
09111 Xenobiotics biodegradation and metabolism	00627 Aminobenzoate degradation	1	0	81	1
09101 Carbohydrate metabolism	00630 Glyoxylate and dicarboxylate metabolism	1	1	100	6
09111 Xenobiotics biodegradation and metabolism	00633 Nitrotoluene degradation	1	0	22	1
09101 Carbohydrate metabolism	00640 Propanoate metabolism	1	1	110	4
09101 Carbohydrate metabolism	00650 Butanoate metabolism	1	0	99	3
09101 Carbohydrate metabolism	00660 C5-Branched dibasic acid metabolism	1	1	29	3
09108 Metabolism of cofactors and vitamins	00670 One carbon pool by folate	1	0	37	7
09102 Energy metabolism	00680 Methane metabolism	1	1	190	13
09102 Energy metabolism	00710 Carbon fixation in photosynthetic organisms	1	1	36	7
09102 Energy metabolism	00720 Carbon fixation pathways in prokaryotes	1	1	106	8
09108 Metabolism of cofactors and vitamins	00730 Thiamine metabolism	1	1	36	9
09108 Metabolism of cofactors and vitamins	00740 Riboflavin metabolism	1	1	49	3
09108 Metabolism of cofactors and vitamins	00750 Vitamin B6 metabolism	1	1	24	4
09108 Metabolism of cofactors and vitamins	00760 Nicotinate and nicotinamide metabolism	1	1	97	10
09108 Metabolism of cofactors and vitamins	00770 Pantothenate and CoA biosynthesis	1	1	44	7
09108 Metabolism of cofactors and vitamins	00780 Biotin metabolism	1	1	23	1
09108 Metabolism of cofactors and vitamins	00790 Folate biosynthesis	1	1	82	7
09108 Metabolism of cofactors and vitamins	00860 Porphyrin and chlorophyll metabolism	1	1	131	8
09109 Metabolism of terpenoids and polyketides	00900 Terpenoid backbone biosynthesis	1	1	59	6
09109 Metabolism of terpenoids and polyketides	00908 Zeatin biosynthesis	1	1	10	1
09102 Energy metabolism	00910 Nitrogen metabolism	1	1	65	4
09111 Xenobiotics biodegradation and metabolism	00930 Caprolactam degradation	1	1	22	1
09110 Biosynthesis of other secondary metabolites	00940 Phenylpropanoid biosynthesis	1	0	38	1
09110 Biosynthesis of other secondary metabolites	00966 Glucosinolate biosynthesis	1	0	21	1
09122 Translation	00970 Aminoacyl-tRNA biosynthesis	1	1	66	19
09111 Xenobiotics biodegradation and metabolism	00983 Drug metabolism - other enzymes	1	0	32	4
09109 Metabolism of terpenoids and polyketides	01051 Biosynthesis of ansamycins	1	0	32	1
09109 Metabolism of terpenoids and polyketides	01052 Type I polyketide structures	1	1	126	1
09175 Drug resistance: antimicrobial	01501 beta-Lactam resistance	1	0	112	2
09175 Drug resistance: antimicrobial	01502 Vancomycin resistance	1	0	22	2
09176 Drug resistance: antineoplastic	01523 Antifolate resistance	1	0	26	3
09176 Drug resistance: antineoplastic	01524 Platinum drug resistance	1	1	46	1
09131 Membrane transport	02010 ABC transporters	1	1	512	28
09132 Signal transduction	02020 Two-component system	1	1	495	18
09145 Cellular community - prokaryotes	02024 Quorum sensing	1	1	282	18
09145 Cellular community - prokaryotes	02025 Biofilm formation - Pseudomonas aeruginosa	1	0	90	4
09145 Cellular community - prokaryotes	02026 Biofilm formation - Escherichia coli	1	0	61	2
09142 Cell motility	02030 Bacterial chemotaxis	1	0	26	1
09142 Cell motility	02040 Flagellar assembly	1	1	55	4
09122 Translation	03008 Ribosome biogenesis in eukaryotes	1	1	82	2
09122 Translation	03010 Ribosome	1	1	143	39
09122 Translation	03013 RNA transport	1	1	142	3
09122 Translation	03015 mRNA surveillance pathway	1	1	63	2
09123 Folding, sorting and degradation	03018 RNA degradation	1	1	79	8
09121 Transcription	03020 RNA polymerase	1	1	51	8
09124 Replication and repair	03030 DNA replication	1	1	60	11
09121 Transcription	03040 Spliceosome	1	1	123	1
09123 Folding, sorting and degradation	03060 Protein export	1	1	39	7
09131 Membrane transport	03070 Bacterial secretion system	1	0	74	6
09124 Replication and repair	03410 Base excision repair	1	1	43	8
09124 Replication and repair	03420 Nucleotide excision repair	1	1	47	7
09124 Replication and repair	03430 Mismatch repair	1	1	44	13
09124 Replication and repair	03440 Homologous recombination	1	1	72	14
09124 Replication and repair	03450 Non-homologous end-joining	1	0	19	1
09124 Replication and repair	03460 Fanconi anemia pathway	1	0	54	1
09132 Signal transduction	04011 MAPK signaling pathway - yeast	1	0	91	1
09132 Signal transduction	04016 MAPK signaling pathway - plant	1	0	54	2
09132 Signal transduction	04066 HIF-1 signaling pathway	1	0	76	3
09132 Signal transduction	04068 FoxO signaling pathway	1	0	102	1
09132 Signal transduction	04075 Plant hormone signal transduction	1	1	45	1
09143 Cell growth and death	04110 Cell cycle	1	0	110	1
09143 Cell growth and death	04112 Cell cycle - Caulobacter	1	1	31	3
09143 Cell growth and death	04115 p53 signaling pathway	1	0	67	2
09123 Folding, sorting and degradation	04120 Ubiquitin mediated proteolysis	1	1	131	2
09123 Folding, sorting and degradation	04122 Sulfur relay system	1	0	29	1
09123 Folding, sorting and degradation	04141 Protein processing in endoplasmic reticulum	1	1	144	4
09141 Transport and catabolism	04142 Lysosome	1	0	105	1
09141 Transport and catabolism	04144 Endocytosis	1	0	169	1
09141 Transport and catabolism	04146 Peroxisome	1	0	73	1
09143 Cell growth and death	04210 Apoptosis	1	1	110	1
09149 Aging	04211 Longevity regulating pathway	1	0	68	1
09149 Aging	04212 Longevity regulating pathway - worm	1	0	57	3
09149 Aging	04213 Longevity regulating pathway - multiple species	1	0	58	1
09143 Cell growth and death	04217 Necroptosis	1	1	97	3
09143 Cell growth and death	04218 Cellular senescence	1	1	117	1
09144 Cellular community - eukaryotes	04530 Tight junction	1	0	106	1
09151 Immune system	04613 Neutrophil extracellular trap formation	1	0	90	1
09151 Immune system	04621 NOD-like receptor signaling pathway	1	1	142	2
09151 Immune system	04623 Cytosolic DNA-sensing pathway	1	0	51	2
09159 Environmental adaptation	04626 Plant-pathogen interaction	1	1	86	1
09151 Immune system	04657 IL-17 signaling pathway	1	0	81	1
09156 Nervous system	04724 Glutamatergic synapse	1	0	88	1
09156 Nervous system	04727 GABAergic synapse	1	0	69	1
09152 Endocrine system	04918 Thyroid hormone synthesis	1	1	53	1
09167 Endocrine and metabolic disease	04940 Type I diabetes mellitus	1	0	25	1
09155 Excretory system	04962 Vasopressin-regulated water reabsorption	1	1	33	1
09154 Digestive system	04976 Bile secretion	1	0	62	1
09164 Neurodegenerative disease	05010 Alzheimer disease	1	0	287	1
09164 Neurodegenerative disease	05012 Parkinson disease	1	0	194	1
09164 Neurodegenerative disease	05014 Amyotrophic lateral sclerosis	1	1	280	3
09164 Neurodegenerative disease	05016 Huntington disease	1	0	229	4
09164 Neurodegenerative disease	05022 Pathways of neurodegeneration - multiple diseases	1	0	368	2
09165 Substance dependence	05034 Alcoholism	1	0	86	1
09145 Cellular community - prokaryotes	05111 Biofilm formation - Vibrio cholerae	1	1	106	3
09171 Infectious disease: bacterial	05130 Pathogenic Escherichia coli infection	1	0	152	1
09171 Infectious disease: bacterial	05132 Salmonella infection	1	0	217	2
09171 Infectious disease: bacterial	05133 Pertussis	1	0	79	1
09171 Infectious disease: bacterial	05134 Legionellosis	1	0	69	2
09174 Infectious disease: parasitic	05143 African trypanosomiasis	1	1	41	1
09171 Infectious disease: bacterial	05152 Tuberculosis	1	0	131	2
09172 Infectious disease: viral	05161 Hepatitis B	1	0	132	1
09172 Infectious disease: viral	05162 Measles	1	0	117	1
09172 Infectious disease: viral	05168 Herpes simplex virus 1 infection	1	0	148	1
09161 Cancer: overview	05205 Proteoglycans in cancer	1	0	165	1
09163 Immune disease	05322 Systemic lupus erythematosus	1	0	45	1
09163 Immune disease	05340 Primary immunodeficiency	1	0	37	1
09166 Cardiovascular disease	05415 Diabetic cardiomyopathy	1	0	160	1
09166 Cardiovascular disease	05417 Lipid and atherosclerosis	1	0	159	1
09166 Cardiovascular disease	05418 Fluid shear stress and atherosclerosis	1	0	99	2
